# Supplementary material for: Epidemiological and Multi-Omics Investigation of Phytosterol Intake and Type 2 Diabetes Risk
Source: Research Square preprint supplement (doi:10.21203/rs.3.rs-9222420/v1), 2026-04-02
Supplement: Supplementary file 1 [file a9aca4db7f48244863e4ec3a.xlsx]

## Sheet: Table S1
Table S1. Study-specific hazard ratios of type 2 diabetes according to quintiles of phytosterol intake
	Quintile 1	Quintile 2	Quintile 3	Quintile 4	Quintile 5	P for trend	Continuous, comparing the 90th to 10th percentiles
Total phytosterol
NHS
Cases/PYs	2017/397333	1821/397966	1765/398215	1672/398338	1392/398189		8667/1990042
Age-adjusted	Reference	0.90 (0.84, 0.96)	0.86 (0.81, 0.92)	0.82 (0.76, 0.87)	0.68 (0.63, 0.72)	<0.001	0.71 (0.67, 0.75)
Multivariable-adjusted	Reference	0.91 (0.85, 0.98)	0.91 (0.85, 0.97)	0.91 (0.84, 0.98)	0.85 (0.78, 0.92)	<0.001	0.85 (0.79, 0.91)
NHS2
Cases/PYs	1993/449995	1780/451366	1551/451737	1470/451811	1191/451806		7985/2256714
Age-adjusted	Reference	0.87 (0.82, 0.93)	0.74 (0.69, 0.79)	0.68 (0.64, 0.73)	0.54 (0.50, 0.58)	<0.001	0.56 (0.53, 0.60)
Multivariable-adjusted	Reference	0.97 (0.91, 1.04)	0.89 (0.83, 0.96)	0.90 (0.84, 0.98)	0.90 (0.82, 0.98)	0.004	0.89 (0.83, 0.96)
HPFS
Cases/PYs	983/201118	848/201808	833/202153	773/202142	619/202503		4056/1009724
Age-adjusted	Reference	0.85 (0.78, 0.93)	0.83 (0.75, 0.91)	0.75 (0.69, 0.83)	0.60 (0.54, 0.66)	<0.001	0.65 (0.60, 0.71)
Multivariable-adjusted	Reference	0.93 (0.84, 1.02)	0.96 (0.87, 1.06)	0.93 (0.83, 1.04)	0.85 (0.75, 0.97)	0.03	0.88 (0.79, 0.98)
β-Sitosterol
NHS
Cases/PYs	2053/397379	1827/397734	1753/398271	1691/398299	1343/398359		8667/1990042
Age-adjusted	Reference	0.88 (0.83, 0.94)	0.84 (0.79, 0.90)	0.81 (0.76, 0.86)	0.64 (0.59, 0.68)	<0.001	0.67 (0.63, 0.71)
Multivariable-adjusted	Reference	0.92 (0.86, 0.98)	0.92 (0.86, 0.99)	0.95 (0.88, 1.02)	0.84 (0.77, 0.92)	<0.001	0.84 (0.78, 0.90)
NHS2
Cases/PYs	2089/449879	1793/451434	1537/451732	1427/451773	1139/451897		7985/2256714
Age-adjusted	Reference	0.84 (0.78, 0.89)	0.70 (0.65, 0.75)	0.63 (0.59, 0.67)	0.49 (0.45, 0.52)	<0.001	0.51 (0.49, 0.55)
Multivariable-adjusted	Reference	0.95 (0.89, 1.02)	0.87 (0.81, 0.94)	0.90 (0.84, 0.97)	0.89 (0.81, 0.97)	0.003	0.88 (0.81, 0.95)
HPFS
Cases/PYs	988/201277	879/201651	813/202099	766/202196	610/202502		4056/1009724
Age-adjusted	Reference	0.87 (0.80, 0.96)	0.80 (0.73, 0.88)	0.74 (0.67, 0.81)	0.58 (0.53, 0.64)	<0.001	0.63 (0.58, 0.68)
Multivariable-adjusted	Reference	0.96 (0.88, 1.06)	0.95 (0.85, 1.05)	0.94 (0.84, 1.05)	0.85 (0.75, 0.97)	0.02	0.88 (0.79, 0.98)
Campesterol
NHS
Cases/PYs	1906/397430	1803/398038	1735/398288	1719/398322	1504/397964		8667/1990042
Age-adjusted	Reference	0.94 (0.89, 1.01)	0.91 (0.85, 0.97)	0.90 (0.84, 0.96)	0.79 (0.73, 0.84)	<0.001	0.81 (0.77, 0.86)
Multivariable-adjusted	Reference	0.92 (0.86, 0.98)	0.88 (0.82, 0.95)	0.89 (0.83, 0.96)	0.85 (0.79, 0.93)	<0.001	0.87 (0.81, 0.94)
NHS2
Cases/PYs	1787/450247	1632/451504	1676/451589	1493/452052	1397/451322		7985/2256714
Age-adjusted	Reference	0.90 (0.84, 0.96)	0.91 (0.86, 0.98)	0.80 (0.75, 0.86)	0.73 (0.68, 0.79)	<0.001	0.73 (0.69, 0.77)
Multivariable-adjusted	Reference	0.95 (0.88, 1.02)	0.98 (0.92, 1.06)	0.88 (0.81, 0.95)	0.93 (0.85, 1.01)	0.02	0.91 (0.84, 0.97)
HPFS
Cases/PYs	927/201090	867/202028	822/202137	798/202189	642/202281		4056/1009724
Age-adjusted	Reference	0.93 (0.85, 1.02)	0.87 (0.79, 0.96)	0.84 (0.77, 0.93)	0.67 (0.61, 0.74)	<0.001	0.70 (0.65, 0.76)
Multivariable-adjusted	Reference	0.97 (0.88, 1.07)	0.95 (0.86, 1.05)	0.96 (0.86, 1.07)	0.88 (0.78, 1.00)	0.06	0.87 (0.79, 0.97)
Stigmasterol
NHS
Cases/PYs	1719/397740	1711/398437	1758/398228	1790/397925	1689/397713		8667/1990042
Age-adjusted	Reference	0.99 (0.93, 1.06)	1.02 (0.95, 1.09)	1.04 (0.97, 1.11)	0.98 (0.92, 1.05)	0.89	0.98 (0.93, 1.04)
Multivariable-adjusted	Reference	0.97 (0.91, 1.04)	0.99 (0.92, 1.06)	1.00 (0.93, 1.07)	0.97 (0.90, 1.05)	0.61	0.96 (0.90, 1.03)
NHS2
Cases/PYs	1524/450998	1507/451648	1634/451600	1687/451655	1633/450813		7985/2256714
Age-adjusted	Reference	0.97 (0.90, 1.04)	1.03 (0.96, 1.10)	1.04 (0.97, 1.12)	0.99 (0.92, 1.06)	0.83	0.97 (0.91, 1.02)
Multivariable-adjusted	Reference	0.96 (0.90, 1.04)	0.99 (0.92, 1.07)	0.98 (0.91, 1.06)	1.01 (0.94, 1.10)	0.54	1.01 (0.95, 1.08)
HPFS
Cases/PYs	866/201418	795/202036	821/202033	806/202224	768/202013		4056/1009724
Age-adjusted	Reference	0.92 (0.83, 1.01)	0.94 (0.86, 1.04)	0.92 (0.83, 1.01)	0.87 (0.79, 0.96)	0.01	0.88 (0.82, 0.95)
Multivariable-adjusted	Reference	0.96 (0.87, 1.06)	1.00 (0.90, 1.11)	0.97 (0.87, 1.08)	0.99 (0.89, 1.11)	0.99	0.99 (0.90, 1.09)
Age-adjusted models were stratified by age and calendar year, and multivariable-adjusted models were further adjusted for body mass index, race, family history of diabetes, menopausal status and postmenopausal hormone use (NHS and NHS2 only), multivitamin use, smoking status, alcohol drinking, physical activity, baseline history of hypertension, baseline history of hypercholesterolemia, intakes o…

## Sheet: Table S2
Table S2. Sensitivity analysis adjusting for total fiber intake
	Main model	Main model + total fiber
Total phytosterol	0.87 (0.83, 0.91)	0.94 (0.89, 1.00)
β-Sitosterol	0.86 (0.82, 0.90)	0.93 (0.87, 0.99)
Campesterol	0.89 (0.85, 0.93)	0.94 (0.90, 0.99)
Stigmasterol	0.99 (0.95, 1.03)	1.07 (1.02, 1.12)
Results from the main model were stratified by age and calendar year, and adjusted for body mass index, race, family history of diabetes, menopausal status and postmenopausal hormone use (NHS and NHS2 only), multivitamin use, smoking status, alcohol drinking, physical activity, baseline history of hypertension, baseline history of hypercholesterolemia, intakes of total energy, and trans fat, rati…

## Sheet: Table S3
Table S3. Association between phytosterol intake and plasma metabolic and metabolomic biomarkers for T2D
			Phytosterol-metabolite association			Metabolite-T2D association			Weights in T2D metabolomic score
Phytosterol	HMDB	Metabolite name	Beta	P	FDR	HR (95% CI)	P	FDR	No. of iteration	Mean weight
Total phytosterol	HMDB0000658	C16:1 CE	-0.167659	<0.001	<0.001	1.01 (0.94, 1.09)	0.8	0.84	0	/
Total phytosterol	HMDB0011252	C38:4 PC plasmalogen	-0.15806	<0.001	<0.001	0.92 (0.86, 1.00)	0.04	0.07	0	/
Total phytosterol	HMDB0008038	C36:1 PC	-0.155027	<0.001	<0.001	1.09 (1.02, 1.17)	0.008	0.01	0	/
Total phytosterol	HMDB0010368	C18:0 CE	-0.137233	<0.001	<0.001	0.83 (0.77, 0.89)	<0.001	<0.001	420	0.0117376
Total phytosterol	HMDB0011386	C38:5 PE plasmalogen	-0.136965	<0.001	<0.001	1.09 (1.01, 1.17)	0.02	0.03	700	0.0196335
Total phytosterol	HMDB0011387	C38:6 PE plasmalogen	-0.135691	<0.001	<0.001	1.07 (1.00, 1.15)	0.05	0.07	0	/
Total phytosterol	HMDB0011512	C20:1 LPE	-0.134076	<0.001	<0.001	0.83 (0.76, 0.90)	<0.001	<0.001	0	/
Total phytosterol	HMDB0005376	C48:2 TAG	-0.133447	<0.001	<0.001	1.56 (1.43, 1.71)	<0.001	<0.001	0	/
Total phytosterol	HMDB0007873	C32:1 PC	-0.133134	<0.001	<0.001	1.31 (1.21, 1.41)	<0.001	<0.001	0	/
Total phytosterol	HMDB0010412	C46:1 TAG	-0.131429	<0.001	<0.001	1.52 (1.39, 1.65)	<0.001	<0.001	0	/
Total phytosterol	HMDB0007870	C30:1 PC	-0.131082	<0.001	<0.001	1.25 (1.16, 1.36)	<0.001	<0.001	0	/
Total phytosterol	HMDB0010383	C16:1 LPC	-0.12979	<0.001	<0.001	1.02 (0.95, 1.10)	0.61	0.67	14	0.012788
Total phytosterol	HMDB0010419	C46:2 TAG	-0.12844	<0.001	<0.001	1.47 (1.35, 1.60)	<0.001	<0.001	0	/
Total phytosterol	HMDB0004952	C22:0 Ceramide	-0.128108	<0.001	<0.001	1.28 (1.20, 1.37)	<0.001	<0.001	1000	0.0798117
Total phytosterol	HMDB0042063	C44:0 TAG	-0.127643	<0.001	<0.001	1.46 (1.35, 1.58)	<0.001	<0.001	0	/
Total phytosterol	HMDB0005432	C48:3 TAG	-0.125177	<0.001	<0.001	1.34 (1.25, 1.43)	<0.001	<0.001	1	-0.0144964
Total phytosterol	HMDB0008048	C38:4 PC	-0.121283	<0.001	<0.001	1.13 (1.06, 1.22)	<0.001	0.001	0	/
Total phytosterol	HMDB0010411	C46:0 TAG	-0.121005	<0.001	0.001	1.56 (1.43, 1.69)	<0.001	<0.001	0	/
Total phytosterol	HMDB0011517	C20:4 LPE	-0.11915	<0.001	0.002	0.92 (0.85, 0.99)	0.02	0.03	272	-0.00622381
Total phytosterol	HMDB0010403	C22:5 LPC	-0.11665	<0.001	0.002	0.89 (0.82, 0.97)	0.005	0.01	800	-0.0128627
Total phytosterol	HMDB0000725	4-Hydroxyproline	-0.113428	<0.001	0.004	1.02 (0.95, 1.10)	0.52	0.59	0	/
Total phytosterol	HMDB0008047	C38:3 PC	-0.112489	<0.001	0.002	1.30 (1.22, 1.39)	<0.001	<0.001	1000	0.0846193
Total phytosterol	HMDB0031106	C51:0 TAG	-0.111996	<0.001	0.003	1.54 (1.42, 1.67)	<0.001	<0.001	21	0.00462189
Total phytosterol	HMDB0005377	C50:2 TAG	-0.111481	<0.001	0.002	1.68 (1.54, 1.83)	<0.001	<0.001	0	/
Total phytosterol	HMDB0006344	Phenylacetylglutamine	-0.110884	<0.001	0.004	0.88 (0.82, 0.94)	<0.001	<0.001	978	-0.0281718
Total phytosterol	HMDB0007972	C34:1 PC	-0.110764	<0.001	0.002	1.14 (1.06, 1.23)	<0.001	0.001	18	-0.00581946
Total phytosterol	HMDB0042104	C51:1 TAG	-0.110523	<0.001	0.003	1.64 (1.51, 1.79)	<0.001	<0.001	1000	0.0398514
Total phytosterol	HMDB0009082	C36:2 PE plasmalogen	-0.110426	<0.001	0.004	1.02 (0.95, 1.10)	0.52	0.59	0	/
Total phytosterol	HMDB0005362	C51:2 TAG	-0.109352	<0.001	0.003	1.40 (1.28, 1.52)	<0.001	<0.001	0	/
Total phytosterol	HMDB0011705	C49:1 TAG	-0.10903	<0.001	0.005	1.42 (1.31, 1.54)	<0.001	<0.001	0	/
Total phytosterol	HMDB0005365	C52:0 TAG	-0.108963	<0.001	0.003	1.57 (1.45, 1.69)	<0.001	<0.001	0	/
Total phytosterol	HMDB0042099	C45:1 TAG	-0.108587	<0.001	0.004	1.40 (1.29, 1.51)	<0.001	<0.001	0	/
Total phytosterol	HMDB0042093	C45:0 TAG	-0.107407	<0.001	0.005	1.30 (1.21, 1.40)	<0.001	<0.001	2	0.00622676
Total phytosterol	HMDB0007883	C34:4 PC	-0.107286	<0.001	0.003	1.25 (1.16, 1.36)	<0.001	<0.001	0	/
Total phytosterol	HMDB0042076	C47:2 TAG	-0.104447	<0.001	0.005	1.41 (1.30, 1.53)	<0.001	<0.001	0	/
Total phytosterol	HMDB0005357	C50:0 TAG	-0.103892	<0.001	0.004	1.69 (1.56, 1.84)	<0.001	<0.001	473	0.000857686
Total phytosterol	HMDB0005356	C48:0 TAG	-0.102418	0.001	0.005	1.68 (1.54, 1.83)	<0.001	<0.001	889	0.0334043
Total phytosterol	HMDB0005359	C48:1 TAG	-0.100941	0.001	0.006	1.65 (1.52, 1.80)	<0.001	<0.001	0	/
Total phytosterol	HMDB0011103	1,7-Dimethyluric acid	-0.0985702	0.002	0.01	1.02 (0.94, 1.10)	0.62	0.69	0	/
Total phytosterol	HMDB0005433	C50:3 TAG	-0.0985423	0.002	0.007	1.48 (1.37, 1.60)	<0.001	<0.001	0	/
Total phytosterol	HMDB0008138	C36:4 PC-B	-0.0969482	0.001	0.006	1.13 (1.05, 1.22)	0.001	0.002	0	/
Total phytosterol	HMDB0042062	C43:0 TAG	-0.0962076	0.003	0.01	1.31 (1.22, 1.41)	<0.001	<0.001	0	/
Total phytosterol	HMDB0043170	C45:2 TAG	-0.0951965	0.003	0.01	1.49 (1.37, 1.62)	<0.001	<0.001	0	/
Total phytosterol	HMDB0011410	C36:5 PE plasmalogen	-0.0950803	0.004	0.02	1.13 (1.06, 1.21)	<0.001	<0.001	1000	0.106275
Total phytosterol	HMDB0005360	C50:1 TAG	-0.0931113	0.002	0.01	1.84 (1.69, 2.01)	<0.001	<0.001	1000	0.0319092
Total phytosterol	HMDB0042100	C47:1 TAG	-0.0930227	0.004	0.02	1.41 (1.29, 1.53)	<0.001	<0.001	0	/
Total phytosterol	HMDB0000062	L-Carnitine	-0.092936	0.004	0.02	1.09 (1.01, 1.17)	0.03	0.05	0	/
Total phytosterol	HMDB0011214	C34:5 PC plasmalogen	-0.0921681	0.005	0.02	1.07 (1.00, 1.15)	0.04	0.07	680	0.00916731
Total phytosterol	HMDB0005923	N4-Acetylcytidine	-0.0919886	0.004	0.01	1.15 (1.07, 1.24)	<0.001	<0.001	1000	0.0357271
Total phytosterol	HMDB0042098	C43:1 TAG	-0.0907195	0.006	0.02	1.43 (1.32, 1.55)	<0.001	<0.001	0	/
Total phytosterol	HMDB0004949	C16:0 Ceramide	-0.087185	0.007	0.02	1.11 (1.04, 1.19)	0.003	0.005	225	0.0030579
Total phytosterol	HMDB0007099	C32:1 DAG	-0.0866982	0.006	0.02	1.75 (1.61, 1.91)	<0.001	<0.001	0	/
Total phytosterol	HMDB0002000	Myristoleic acid	-0.0865852	0.007	0.02	1.03 (0.96, 1.11)	0.39	0.46	733	0.00490896
Total phytosterol	HMDB0010370	C18:3 CE	-0.0864774	0.007	0.02	0.81 (0.75, 0.87)	<0.001	<0.001	0	/
Total phytosterol	HMDB0005435	C50:4 TAG	-0.0860533	0.005	0.02	1.36 (1.25, 1.49)	<0.001	<0.001	0	/
Total phytosterol	HMDB0005367	C52:1 TAG	-0.0845293	0.006	0.02	1.58 (1.48, 1.69)	<0.001	<0.001	1000	0.0687752
Total phytosterol	HMDB0011220	C36:5 PC plasmalogen-B	-0.0842437	0.008	0.03	0.93 (0.86, 1.00)	0.06	0.09	0	/
Total phytosterol	HMDB0009069	C38:5 PE	-0.0840167	0.007	0.02	1.12 (1.05, 1.19)	<0.001	0.002	0	/
Total phytosterol	HMDB0000767	Pseudouridine	-0.0836037	0.008	0.03	0.97 (0.90, 1.04)	0.41	0.49	686	-0.0452872
Total phytosterol	HMDB0013238	C7 carnitine	-0.0832374	0.01	0.03	1.04 (0.96, 1.12)	0.32	0.39	0	/
Total phytosterol	HMDB0000688	C5 carnitine	-0.0809498	0.01	0.04	1.26 (1.18, 1.35)	<0.001	<0.001	1000	0.061755
Total phytosterol	HMDB0010471	C50:5 TAG	-0.0808059	0.01	0.03	1.35 (1.24, 1.46)	<0.001	<0.001	0	/
Total phytosterol	HMDB0000182	L-Lysine	-0.0796321	0.01	0.03	1.20 (1.12, 1.29)	<0.001	<0.001	0	/
Total phytosterol	HMDB0008952	C34:2 PE plasmalogen	-0.078565	0.02	0.05	1.02 (0.95, 1.10)	0.57	0.63	0	/
Total phytosterol	HMDB0010497	C50:6 TAG	-0.0785294	0.01	0.04	1.33 (1.23, 1.44)	<0.001	<0.001	0	/
Total phytosterol	HMDB0007100	C34:0 DAG	-0.0784484	0.01	0.04	1.52 (1.43, 1.63)	<0.001	<0.001	0	/
Total phytosterol	HMDB0000064	Creatine	-0.0777739	0.01	0.04	1.04 (0.97, 1.12)	0.29	0.36	14	-0.00580657
Total phytosterol	HMDB0010379	C14:0 LPC	-0.0774924	0.01	0.04	1.18 (1.10, 1.26)	<0.001	<0.001	0	/
Total phytosterol	HMDB0001859	Acetaminophen	-0.0752526	0.02	0.06	1.03 (0.96, 1.10)	0.37	0.44	407	0.007133
Total phytosterol	HMDB0011706	C49:2 TAG	-0.075222	0.02	0.05	1.35 (1.24, 1.46)	<0.001	<0.001	0	/
Total phytosterol	HMDB0005395	C54:1 TAG	-0.073908	0.02	0.05	1.50 (1.39, 1.62)	<0.001	<0.001	0	/
Total phytosterol	HMDB0006736	C20:3 CE	-0.0734163	0.03	0.06	0.83 (0.77, 0.89)	<0.001	<0.001	7	0.00507073
Total phytosterol	HMDB0011441	C36:3 PE plasmalogen	-0.0733004	0.02	0.06	0.95 (0.88, 1.02)	0.16	0.21	0	/
Total phytosterol	HMDB0007869	C30:0 PC	-0.0732811	0.02	0.05	1.17 (1.09, 1.24)	<0.001	<0.001	0	/
Total phytosterol	HMDB0000705	Hexanoylcarnitine	-0.071365	0.02	0.05	1.13 (1.04, 1.23)	0.004	0.008	27	0.0135372
Total phytosterol	HMDB0001847	Caffeine	-0.0713094	0.02	0.06	1.06 (0.98, 1.15)	0.15	0.21	0	/
Total phytosterol	HMDB0001886	3-Methylxanthine	-0.0699134	0.03	0.06	0.97 (0.90, 1.05)	0.45	0.52	1	-0.0043781
Total phytosterol	HMDB0000167	L-Threonine	-0.0686148	0.02	0.06	1.03 (0.95, 1.12)	0.43	0.5	13	0.00428015
Total phytosterol	HMDB0011442	C36:4 PE plasmalogen	-0.0685287	0.04	0.09	0.95 (0.88, 1.02)	0.19	0.25	0	/
Total phytosterol	HMDB0007216	C36:1 DAG	-0.0668426	0.03	0.08	1.60 (1.48, 1.71)	<0.001	<0.001	12	0.00193567
Total phytosterol	HMDB0010395	C20:4 LPC	-0.0656199	0.04	0.09	0.90 (0.83, 0.96)	0.003	0.007	0	/
Total phytosterol	HMDB0008937	C36:4 PE	-0.0652357	0.03	0.08	1.21 (1.13, 1.29)	<0.001	<0.001	0	/
Total phytosterol	HMDB0042103	C49:3 TAG	-0.0626479	0.05	0.1	1.22 (1.14, 1.31)	<0.001	<0.001	14	-0.00797038
Total phytosterol	HMDB0012101	C18:1 SM	-0.0623674	0.04	0.09	0.85 (0.79, 0.92)	<0.001	<0.001	976	0.0215911
Total phytosterol	HMDB0005369	C52:2 TAG	-0.0621985	0.04	0.09	1.58 (1.46, 1.70)	<0.001	<0.001	0	/
Total phytosterol	HMDB0042196	C53:2 TAG	-0.0601724	0.06	0.11	1.22 (1.14, 1.31)	<0.001	<0.001	0	/
Total phytosterol	HMDB0008006	C34:3 PC	-0.0594219	0.05	0.11	1.11 (1.03, 1.19)	0.009	0.02	0	/
Total phytosterol	HMDB0000884	Ribothymidine	-0.0570027	0.08	0.16	0.92 (0.86, 0.99)	0.03	0.05	1	-0.00767878
Total phytosterol	HMDB0007199	C38:5 DAG	-0.0564546	0.08	0.15	1.38 (1.28, 1.48)	<0.001	<0.001	0	/
Total phytosterol	HMDB0001325	N6,N6,N6-Trimethyl-L-lysine	-0.0563486	0.09	0.16	1.03 (0.96, 1.11)	0.41	0.49	0	/
Total phytosterol	HMDB0000824	Propionylcarnitine	-0.0556192	0.09	0.17	1.10 (1.03, 1.18)	0.003	0.006	421	-0.0122942
Total phytosterol	HMDB0000206	N6-Acetyl-L-lysine	-0.0554298	0.08	0.16	0.95 (0.88, 1.03)	0.22	0.28	993	-0.0332684
Total phytosterol	HMDB0001991	7-Methylxanthine	-0.0550038	0.08	0.15	0.97 (0.90, 1.05)	0.44	0.51	0	/
Total phytosterol	HMDB0007011	C30:0 DAG	-0.0547428	0.09	0.17	1.60 (1.49, 1.73)	<0.001	<0.001	890	0.00562473
Total phytosterol	HMDB0007102	C34:1 DAG	-0.053418	0.09	0.17	1.70 (1.58, 1.84)	<0.001	<0.001	1000	0.16587
Total phytosterol	HMDB0004824	N2,N2-Dimethylguanosine	-0.0527166	0.1	0.17	1.11 (1.04, 1.19)	0.002	0.003	977	0.03856
Total phytosterol	HMDB0005458	C58:6 TAG	-0.0527029	0.09	0.17	1.07 (0.99, 1.15)	0.11	0.15	0	/
Total phytosterol	HMDB0004953	C24:1 Ceramide	-0.0518408	0.11	0.19	1.06 (0.99, 1.14)	0.08	0.12	4	-0.00559745
Total phytosterol	HMDB0011343	C34:3 PE plasmalogen	-0.0515566	0.12	0.21	0.98 (0.92, 1.06)	0.65	0.71	0	/
Total phytosterol	HMDB0009003	C38:4 PE	-0.0509296	0.1	0.18	1.27 (1.20, 1.35)	<0.001	<0.001	0	/
Total phytosterol	HMDB0011384	C38:3 PE plasmalogen	-0.0501931	0.1	0.18	0.77 (0.72, 0.83)	<0.001	<0.001	0	/
Total phytosterol	HMDB0007103	C34:2 DAG	-0.0493205	0.12	0.21	1.61 (1.49, 1.74)	<0.001	<0.001	0	/
Total phytosterol	HMDB0007874	C32:2 PC	-0.0476765	0.13	0.22	1.20 (1.12, 1.28)	<0.001	<0.001	0	/
Total phytosterol	HMDB0000479	3-Methylhistidine	-0.0472932	0.12	0.21	0.98 (0.91, 1.07)	0.67	0.73	2	-0.00496824
Total phytosterol	HMDB0007218	C36:2 DAG	-0.0471724	0.14	0.23	1.48 (1.38, 1.60)	<0.001	<0.001	0	/
Total phytosterol	HMDB0007098	C32:0 DAG	-0.0451549	0.15	0.25	1.66 (1.55, 1.79)	<0.001	<0.001	894	0.0149688
Total phytosterol	HMDB0008105	C36:3 PC	-0.0449201	0.15	0.25	1.07 (0.99, 1.16)	0.07	0.1	0	/
Total phytosterol	HMDB0012097	C14:0 SM	-0.0446441	0.13	0.23	0.95 (0.88, 1.03)	0.19	0.25	5	-0.011929
Total phytosterol	HMDB0006725	C14:0 CE	-0.0435127	0.16	0.26	0.91 (0.84, 0.99)	0.02	0.03	887	-0.0322855
Total phytosterol	HMDB0042226	C55:2 TAG	-0.0421551	0.18	0.29	1.42 (1.32, 1.53)	<0.001	<0.001	0	/
Total phytosterol	HMDB0005396	C56:1 TAG	-0.0415649	0.19	0.3	1.39 (1.29, 1.49)	<0.001	<0.001	0	/
Total phytosterol	HMDB0008923	C32:0 PE	-0.040808	0.2	0.32	1.12 (1.04, 1.21)	0.004	0.008	0	/
Total phytosterol	HMDB0000898	1-Methylhistamine	-0.0395919	0.21	0.33	1.07 (0.99, 1.15)	0.1	0.14	182	0.007491
Total phytosterol	HMDB0008270	C38:2 PC	-0.0391443	0.21	0.33	1.04 (0.97, 1.12)	0.24	0.3	0	/
Total phytosterol	HMDB0002013	C4 carnitine	-0.0382114	0.25	0.38	1.08 (1.01, 1.16)	0.03	0.05	0	/
Total phytosterol	HMDB0002250	C12 carnitine	-0.0375875	0.25	0.38	1.00 (0.92, 1.08)	0.97	0.97	55	-0.0117085
Total phytosterol	HMDB0010375	C22:5 CE	-0.0372889	0.27	0.4	0.76 (0.73, 0.80)	<0.001	<0.001	990	-0.00759042
Total phytosterol	HMDB0005384	C52:3 TAG	-0.0356693	0.26	0.4	1.37 (1.27, 1.49)	<0.001	<0.001	0	/
Total phytosterol	HMDB0000562	Creatinine	-0.0355185	0.27	0.4	0.87 (0.81, 0.94)	<0.001	<0.001	1000	-0.0791286
Total phytosterol	HMDB0001348	C18:0 SM	-0.0354531	0.26	0.39	0.97 (0.90, 1.04)	0.34	0.41	838	0.00426888
Total phytosterol	HMDB0000904	Citrulline	-0.0344577	0.29	0.43	0.93 (0.86, 1.00)	0.06	0.09	4	0.00930729
Total phytosterol	HMDB0005456	C56:6 TAG	-0.0324639	0.33	0.47	1.00 (0.93, 1.07)	0.96	0.97	0	/
Total phytosterol	HMDB0000925	Trimethylamine N-oxide	-0.0320124	0.34	0.49	1.02 (0.95, 1.10)	0.53	0.6	171	0.00975267
Total phytosterol	HMDB0000162	L-Proline	-0.0305296	0.34	0.49	1.19 (1.11, 1.28)	<0.001	<0.001	255	0.00589416
Total phytosterol	HMDB0000715	Kynurenic acid	-0.0301273	0.32	0.47	1.07 (0.99, 1.15)	0.11	0.16	0	/
Total phytosterol	HMDB0000158	L-Tyrosine	-0.0299918	0.36	0.51	1.31 (1.23, 1.40)	<0.001	<0.001	1000	0.0916082
Total phytosterol	HMDB0001046	Cotinine	-0.0298834	0.15	0.25	1.02 (0.91, 1.14)	0.76	0.81	2	0.00256929
Total phytosterol	HMDB0011507	C18:2 LPE	-0.0294793	0.36	0.51	0.90 (0.84, 0.97)	0.006	0.01	1	-0.0133346
Total phytosterol	HMDB0008928	C34:2 PE	-0.0284599	0.37	0.53	1.25 (1.17, 1.33)	<0.001	<0.001	1	0.00157532
Total phytosterol	HMDB0005436	C52:6 TAG	-0.0261627	0.41	0.56	1.21 (1.12, 1.31)	<0.001	<0.001	0	/
Total phytosterol	HMDB0000897	7-Methylguanine	-0.0255958	0.43	0.58	1.12 (1.04, 1.20)	0.002	0.004	0	/
Total phytosterol	HMDB0000161	L-Alanine	-0.0254984	0.43	0.58	1.45 (1.35, 1.57)	<0.001	<0.001	1000	0.254442
Total phytosterol	HMDB0007132	C34:3 DAG	-0.0254845	0.44	0.58	1.59 (1.45, 1.73)	<0.001	<0.001	0	/
Total phytosterol	HMDB0011701	C51:3 TAG	-0.0248922	0.42	0.58	1.23 (1.13, 1.34)	<0.001	<0.001	0	/
Total phytosterol	HMDB0011221	C36:5 PC plasmalogen-A	-0.0245207	0.43	0.58	0.95 (0.87, 1.03)	0.19	0.25	0	/
Total phytosterol	HMDB0004620	N-a-Acetyl-L-arginine	-0.0244938	0.43	0.58	1.02 (0.95, 1.10)	0.6	0.66	1	0.00106136
Total phytosterol	HMDB0000791	L-Octanoylcarnitine	-0.0238646	0.45	0.6	0.99 (0.92, 1.08)	0.89	0.92	1	-0.0301821
Total phytosterol	HMDB0011244	C36:3 PC plasmalogen-A	-0.0237155	0.46	0.6	0.71 (0.67, 0.77)	<0.001	<0.001	1000	-0.047628
Total phytosterol	HMDB0003282	1-Methylguanine	-0.023415	0.45	0.6	1.01 (0.93, 1.08)	0.89	0.91	0	/
Total phytosterol	HMDB0004956	C24:0 Ceramide	-0.0232696	0.47	0.61	1.20 (1.12, 1.28)	<0.001	<0.001	0	/
Total phytosterol	HMDB0001563	1-Methylguanosine	-0.0218962	0.5	0.64	1.22 (1.14, 1.31)	<0.001	<0.001	1000	0.0938988
Total phytosterol	HMDB0006726	C20:4 CE	-0.0211939	0.52	0.66	0.75 (0.70, 0.80)	<0.001	<0.001	0	/
Total phytosterol	HMDB0005406	C56:5 TAG	-0.0209482	0.53	0.66	1.01 (0.94, 1.08)	0.79	0.83	0	/
Total phytosterol	HMDB0012102	C20:0 SM	-0.0190082	0.54	0.68	1.00 (0.92, 1.08)	0.93	0.94	0	/
Total phytosterol	HMDB0008991	C36:0 PE	-0.0175537	0.57	0.7	0.97 (0.90, 1.05)	0.45	0.52	0	/
Total phytosterol	HMDB0011506	C18:1 LPE	-0.0174879	0.59	0.72	0.91 (0.84, 0.98)	0.02	0.03	1	-0.0186852
Total phytosterol	HMDB0005403	C54:2 TAG	-0.0158612	0.62	0.73	1.34 (1.26, 1.42)	<0.001	<0.001	0	/
Total phytosterol	HMDB0011243	C36:2 PC plasmalogen	-0.0156809	0.62	0.73	0.68 (0.62, 0.74)	<0.001	<0.001	1	-0.00139535
Total phytosterol	HMDB0002366	C5:1 carnitine	-0.0154317	0.63	0.73	1.10 (1.02, 1.18)	0.01	0.02	102	-0.00349833
Total phytosterol	HMDB0000063	Cortisol	-0.0150824	0.63	0.73	0.98 (0.90, 1.05)	0.53	0.59	14	-0.00162971
Total phytosterol	HMDB0002815	C18:1 LPC	-0.015072	0.62	0.73	0.77 (0.70, 0.84)	<0.001	<0.001	0	/
Total phytosterol	HMDB0059824	4-Hydroxy-3-methylacetophenone	-0.0136466	0.65	0.75	1.04 (0.96, 1.13)	0.33	0.4	0	/
Total phytosterol	HMDB0003681	4-Acetamidobutanoic acid	-0.0135091	0.67	0.76	0.95 (0.88, 1.02)	0.15	0.21	0	/
Total phytosterol	HMDB0000918	C18:1 CE	-0.0128766	0.68	0.76	0.68 (0.63, 0.73)	<0.001	<0.001	0	/
Total phytosterol	HMDB0000631	Deoxycholic acid glycine conjugate	-0.0124648	0.68	0.76	1.15 (1.06, 1.25)	<0.001	0.001	273	0.00498851
Total phytosterol	HMDB0000651	Decanoylcarnitine	-0.0108311	0.73	0.82	0.99 (0.91, 1.07)	0.76	0.81	0	/
Total phytosterol	HMDB0011478	C18:3 LPE	-0.00993353	0.75	0.83	0.98 (0.91, 1.06)	0.63	0.69	997	-0.0217195
Total phytosterol	HMDB0008993	C36:1 PE	-0.00908215	0.77	0.85	1.40 (1.30, 1.52)	<0.001	<0.001	0	/
Total phytosterol	HMDB0000289	Uric acid	-0.00803779	0.79	0.85	1.29 (1.21, 1.38)	<0.001	<0.001	1000	0.0538055
Total phytosterol	HMDB0013326	C12:1 carnitine	-0.00802649	0.81	0.86	0.95 (0.88, 1.03)	0.2	0.26	567	-0.0246442
Total phytosterol	HMDB0005380	C52:5 TAG	-0.00786499	0.8	0.85	1.08 (1.00, 1.17)	0.06	0.08	0	/
Total phytosterol	HMDB0000462	Allantoin	-0.00637081	0.84	0.89	1.03 (0.96, 1.11)	0.46	0.53	0	/
Total phytosterol	HMDB0010517	C52:7 TAG	-0.00599547	0.85	0.89	1.19 (1.11, 1.27)	<0.001	<0.001	0	/
Total phytosterol	HMDB0008994	C36:2 PE	-0.00583371	0.85	0.89	1.28 (1.21, 1.36)	<0.001	<0.001	0	/
Total phytosterol	HMDB0000172	L-Isoleucine	-0.00529897	0.87	0.91	1.26 (1.20, 1.33)	<0.001	<0.001	0	/
Total phytosterol	HMDB0043058	C53:3 TAG	-0.00326307	0.92	0.95	1.01 (0.94, 1.09)	0.78	0.83	11	-0.00239647
Total phytosterol	HMDB0000301	Urocanic acid	-0.00285627	0.93	0.95	1.06 (0.99, 1.13)	0.1	0.14	683	0.0100393
Total phytosterol	HMDB0013287	Ne,Ne dimethyllysine	-0.0026691	0.94	0.95	0.99 (0.92, 1.06)	0.7	0.75	0	/
Total phytosterol	HMDB0005066	C14 carnitine	-0.00142576	0.97	0.97	1.09 (1.01, 1.17)	0.03	0.05	0	/
Total phytosterol	HMDB0002802	Cortisone	-0.000876638	0.98	0.98	1.04 (0.96, 1.13)	0.29	0.37	0	/
Total phytosterol	HMDB0000128	Guanidoacetic acid	0.0013656	0.97	0.97	0.93 (0.86, 1.00)	0.05	0.08	150	0.012483
Total phytosterol	HMDB0011310	C36:4 PC plasmalogen	0.00203277	0.95	0.96	0.75 (0.69, 0.81)	<0.001	<0.001	0	/
Total phytosterol	HMDB0005404	C56:2 TAG	0.00223168	0.94	0.96	1.35 (1.26, 1.45)	<0.001	<0.001	0	/
Total phytosterol	HMDB0004193	N1-Methyl-2-pyridone-5-carboxamide	0.00250692	0.94	0.95	1.04 (0.96, 1.12)	0.34	0.42	1	0.0112163
Total phytosterol	HMDB0000026	Ureidopropionic acid	0.00325304	0.92	0.95	1.12 (1.04, 1.20)	0.002	0.003	1	0.00413514
Total phytosterol	HMDB0010382	C16:0 LPC	0.00403773	0.9	0.93	0.98 (0.91, 1.05)	0.53	0.59	0	/
Total phytosterol	HMDB0013288	C9 carnitine	0.00607723	0.85	0.89	1.03 (0.95, 1.11)	0.5	0.58	0	/
Total phytosterol	HMDB0012356	C34:0 PS	0.00645492	0.84	0.89	1.07 (0.99, 1.15)	0.08	0.12	0	/
Total phytosterol	HMDB0004030	21-Deoxycortisol	0.00793242	0.79	0.85	0.91 (0.84, 0.98)	0.01	0.02	993	-0.0322908
Total phytosterol	HMDB0000687	L-Leucine	0.0084091	0.8	0.85	1.28 (1.21, 1.34)	<0.001	<0.001	0	/
Total phytosterol	HMDB0008925	C34:0 PE	0.00846225	0.79	0.85	1.07 (1.00, 1.15)	0.04	0.07	1	0.0189619
Total phytosterol	HMDB0011130	C18:0 LPE	0.00862035	0.78	0.85	1.00 (0.94, 1.07)	0.97	0.97	1	-0.000743083
Total phytosterol	HMDB0000641	L-Glutamine	0.00904988	0.78	0.85	0.89 (0.83, 0.96)	0.003	0.006	936	-0.00422016
Total phytosterol	HMDB0009060	C36:3 PE	0.0102055	0.75	0.83	1.16 (1.09, 1.24)	<0.001	<0.001	5	0.0106934
Total phytosterol	HMDB0010397	C20:5 LPC	0.0105646	0.74	0.83	0.79 (0.72, 0.86)	<0.001	<0.001	0	/
Total phytosterol	HMDB0007871	C32:0 PC	0.0116889	0.7	0.79	1.08 (1.00, 1.16)	0.06	0.09	0	/
Total phytosterol	HMDB0010384	C18:0 LPC	0.0129212	0.67	0.76	0.93 (0.86, 1.00)	0.06	0.09	0	/
Total phytosterol	HMDB0000696	L-Methionine	0.0143181	0.67	0.76	1.08 (1.01, 1.15)	0.03	0.05	269	-0.0136931
Total phytosterol	HMDB0001539	ADMA	0.0150915	0.62	0.73	1.03 (0.96, 1.12)	0.42	0.49	0	/
Total phytosterol	HMDB0029377	Piperine	0.0153542	0.63	0.73	1.16 (1.07, 1.26)	<0.001	<0.001	700	0.0104845
Total phytosterol	HMDB0011503	C16:0 LPE	0.015537	0.61	0.73	0.95 (0.87, 1.02)	0.16	0.21	1000	-0.0938891
Total phytosterol	HMDB0002014	C14:1 carnitine	0.0163731	0.61	0.73	0.95 (0.88, 1.03)	0.2	0.26	1	-0.0129075
Total phytosterol	HMDB0000177	L-Histidine	0.0164095	0.6	0.72	1.01 (0.94, 1.09)	0.75	0.81	696	-0.0238516
Total phytosterol	HMDB0009016	C36:1 PE plasmalogen	0.0165381	0.59	0.72	0.69 (0.64, 0.76)	<0.001	<0.001	0	/
Total phytosterol	HMDB0000259	Serotonin	0.0172585	0.56	0.69	0.95 (0.88, 1.03)	0.2	0.26	0	/
Total phytosterol	HMDB0000699	1-Methylnicotinamide	0.0173348	0.6	0.72	0.99 (0.92, 1.07)	0.84	0.88	114	-0.00150964
Total phytosterol	HMDB0010407	C16:1 LPC plasmalogen	0.0176852	0.55	0.69	0.75 (0.69, 0.83)	<0.001	<0.001	0	/
Total phytosterol	HMDB0000112	GABA	0.0181105	0.55	0.69	1.12 (1.05, 1.20)	0.001	0.003	0	/
Total phytosterol	HMDB0010169	C16:0 SM	0.018373	0.56	0.69	0.77 (0.71, 0.83)	<0.001	<0.001	0	/
Total phytosterol	HMDB0000201	L-Acetylcarnitine	0.0189566	0.57	0.69	1.02 (0.94, 1.09)	0.68	0.73	0	/
Total phytosterol	HMDB0013130	C5-DC carnitine	0.0192609	0.56	0.69	0.91 (0.85, 0.98)	0.01	0.03	808	-0.0181962
Total phytosterol	HMDB0000883	L-Valine	0.0206358	0.52	0.66	1.37 (1.29, 1.45)	<0.001	<0.001	1000	0.102436
Total phytosterol	HMDB0013325	C10:2 carnitine	0.0216397	0.49	0.63	1.08 (0.99, 1.17)	0.08	0.11	707	0.0341013
Total phytosterol	HMDB0005385	C54:5 TAG	0.0229318	0.49	0.63	1.09 (1.03, 1.16)	0.003	0.007	0	/
Total phytosterol	HMDB0000885	C16:0 CE	0.0232273	0.47	0.61	0.70 (0.66, 0.75)	<0.001	<0.001	0	/
Total phytosterol	HMDB0011211	C34:3 PC plasmalogen	0.0243607	0.45	0.6	0.70 (0.64, 0.76)	<0.001	<0.001	920	-0.0290035
Total phytosterol	HMDB0010386	C18:2 LPC	0.0249821	0.43	0.58	0.73 (0.66, 0.80)	<0.001	<0.001	1000	-0.112765
Total phytosterol	HMDB0000991	2-Aminooctanoic acid	0.0273856	0.4	0.55	0.96 (0.89, 1.04)	0.33	0.4	0	/
Total phytosterol	HMDB0000248	Thyroxine	0.027844	0.38	0.53	0.92 (0.85, 0.99)	0.03	0.04	887	-0.0317891
Total phytosterol	HMDB0008039	C36:2 PC	0.0283612	0.38	0.54	1.06 (0.99, 1.14)	0.09	0.13	0	/
Total phytosterol	HMDB0005471	C58:7 TAG	0.0286947	0.38	0.54	0.92 (0.86, 0.99)	0.02	0.04	927	-0.0248557
Total phytosterol	HMDB0005410	C56:3 TAG	0.0330093	0.31	0.45	1.27 (1.18, 1.37)	<0.001	<0.001	0	/
Total phytosterol	HMDB0011229	C38:7 PC plasmalogen	0.0353402	0.27	0.4	0.87 (0.81, 0.94)	<0.001	0.001	0	/
Total phytosterol	HMDB0007219	C36:3 DAG	0.0359799	0.27	0.4	1.22 (1.15, 1.28)	<0.001	<0.001	0	/
Total phytosterol	HMDB0005405	C54:3 TAG	0.0360549	0.27	0.4	1.11 (1.03, 1.19)	0.005	0.009	0	/
Total phytosterol	HMDB0011210	C34:2 PC plasmalogen	0.0380333	0.23	0.35	0.69 (0.65, 0.73)	<0.001	<0.001	1000	-0.121139
Total phytosterol	HMDB0013331	C14:2 carnitine	0.039647	0.22	0.34	0.95 (0.88, 1.02)	0.16	0.22	0	/
Total phytosterol	HMDB0005363	C52:4 TAG	0.0407075	0.2	0.32	1.19 (1.09, 1.29)	<0.001	<0.001	0	/
Total phytosterol	HMDB0000054	Bilirubin	0.0486119	0.13	0.22	0.97 (0.91, 1.05)	0.46	0.53	0	/
Total phytosterol	HMDB0005398	C56:4 TAG	0.0486442	0.13	0.22	1.02 (0.95, 1.10)	0.56	0.63	0	/
Total phytosterol	HMDB0042466	C55:3 TAG	0.049469	0.13	0.22	0.91 (0.85, 0.98)	0.02	0.03	0	/
Total phytosterol	HMDB0029416	L-Targinine	0.0512813	0.09	0.17	1.19 (1.11, 1.27)	<0.001	<0.001	811	0.0247696
Total phytosterol	HMDB0011394	C40:7 PE plasmalogen	0.0523873	0.1	0.18	0.96 (0.88, 1.03)	0.27	0.34	0	/
Total phytosterol	HMDB0000235	Thiamine	0.0530074	0.07	0.13	0.89 (0.82, 0.97)	0.01	0.02	0	/
Total phytosterol	HMDB0010498	C54:9 TAG	0.0546962	0.1	0.17	1.11 (1.02, 1.20)	0.01	0.02	0	/
Total phytosterol	HMDB0000630	Cytosine	0.0596079	0.07	0.15	1.01 (0.94, 1.08)	0.87	0.9	0	/
Total phytosterol	HMDB0007973	C34:2 PC	0.0600863	0.05	0.1	1.11 (1.03, 1.20)	0.006	0.01	0	/
Total phytosterol	HMDB0000123	Glycine	0.0602375	0.04	0.09	0.74 (0.68, 0.81)	<0.001	<0.001	1000	-0.0370618
Total phytosterol	HMDB0000929	L-Tryptophan	0.0605417	0.07	0.14	1.10 (1.03, 1.18)	0.003	0.006	0	/
Total phytosterol	HMDB0001008	Biliverdin	0.0615327	0.06	0.12	0.96 (0.89, 1.03)	0.23	0.3	558	-0.00755182
Total phytosterol	HMDB0007983	C36:4 PC-A	0.061847	0.06	0.12	0.90 (0.84, 0.97)	0.003	0.007	1000	-0.0705718
Total phytosterol	HMDB0000210	Pantothenic acid	0.0623362	0.03	0.08	1.04 (0.96, 1.12)	0.38	0.46	0	/
Total phytosterol	HMDB0011420	C38:7 PE plasmalogen	0.0631404	0.04	0.09	1.05 (0.97, 1.14)	0.21	0.27	0	/
Total phytosterol	HMDB0000159	L-Phenylalanine	0.0643214	0.05	0.11	1.19 (1.12, 1.26)	<0.001	<0.001	499	0.012215
Total phytosterol	HMDB0000092	Dimethylglycine	0.0648862	0.04	0.09	1.00 (0.93, 1.07)	0.92	0.94	1	-0.00509167
Total phytosterol	HMDB0001906	2-Aminoisobutyric acid	0.0651499	0.05	0.11	0.93 (0.87, 1.00)	0.04	0.07	469	-0.00520656
Total phytosterol	HMDB0006731	C20:5 CE	0.0661247	0.04	0.09	0.81 (0.76, 0.87)	<0.001	<0.001	0	/
Total phytosterol	HMDB0007248	C36:4 DAG	0.0674234	0.03	0.08	1.21 (1.12, 1.31)	<0.001	<0.001	0	/
Total phytosterol	HMDB0005447	C54:7 TAG	0.0676125	0.03	0.08	1.06 (0.98, 1.14)	0.15	0.2	0	/
Total phytosterol	HMDB0001565	Phosphocholine	0.0678888	0.02	0.04	0.94 (0.86, 1.02)	0.14	0.19	842	-0.0147396
Total phytosterol	HMDB0008057	C40:6 PC	0.0689054	0.03	0.06	1.00 (0.92, 1.08)	0.96	0.97	0	/
Total phytosterol	HMDB0005370	C54:4 TAG	0.070923	0.03	0.06	0.95 (0.89, 1.03)	0.21	0.27	0	/
Total phytosterol	HMDB0000168	L-Asparagine	0.0715547	0.02	0.05	0.83 (0.76, 0.90)	<0.001	<0.001	1000	-0.194886
Total phytosterol	HMDB0010518	C54:8 TAG	0.0718119	0.03	0.06	1.11 (1.03, 1.20)	0.008	0.01	0	/
Total phytosterol	HMDB0011208	C34:1 PC plasmalogen	0.0732853	0.02	0.06	0.72 (0.66, 0.78)	<0.001	<0.001	0	/
Total phytosterol	HMDB0001276	N1-Acetylspermidine	0.0754917	0.01	0.04	0.95 (0.87, 1.02)	0.16	0.22	30	0.00645149
Total phytosterol	HMDB0010513	C56:10 TAG	0.0792417	0.01	0.04	1.04 (0.96, 1.12)	0.37	0.44	0	/
Total phytosterol	HMDB0000610	C18:2 CE	0.0826479	0.008	0.03	0.67 (0.63, 0.72)	<0.001	<0.001	0	/
Total phytosterol	HMDB0000187	L-Serine	0.0836563	0.005	0.02	0.84 (0.77, 0.92)	<0.001	<0.001	4	0.010353
Total phytosterol	HMDB0013127	C4-OH carnitine	0.0840069	0.01	0.03	1.20 (1.11, 1.30)	<0.001	<0.001	1000	0.116759
Total phytosterol	HMDB0005391	C54:6 TAG	0.0841532	0.01	0.03	0.99 (0.92, 1.07)	0.81	0.84	0	/
Total phytosterol	HMDB0008942	C38:2 PE	0.0859732	0.007	0.02	0.80 (0.74, 0.87)	<0.001	<0.001	0	/
Total phytosterol	HMDB0008511	C40:10 PC	0.088334	0.004	0.02	0.87 (0.81, 0.94)	<0.001	0.001	9	-0.00530957
Total phytosterol	HMDB0009102	C38:6 PE	0.0901817	0.002	0.01	1.17 (1.08, 1.27)	<0.001	<0.001	0	/
Total phytosterol	HMDB0013678	4-Hydroxyhippuric acid	0.0921126	0.003	0.01	0.90 (0.83, 0.97)	0.009	0.02	933	-0.0262096
Total phytosterol	HMDB0012107	C24:1 SM	0.0980182	0.002	0.007	0.79 (0.73, 0.86)	<0.001	<0.001	0	/
Total phytosterol	HMDB0011526	C22:6 LPE	0.101776	0.002	0.007	0.91 (0.84, 0.98)	0.02	0.03	0	/
Total phytosterol	HMDB0013713	N-acetyltryptophan	0.106628	<0.001	0.004	1.01 (0.94, 1.09)	0.78	0.83	0	/
Total phytosterol	HMDB0005448	C56:9 TAG	0.10957	<0.001	0.003	1.01 (0.93, 1.09)	0.81	0.84	0	/
Total phytosterol	HMDB0005462	C56:7 TAG	0.110694	<0.001	0.004	1.08 (1.00, 1.17)	0.04	0.06	0	/
Total phytosterol	HMDB0010531	C58:11 TAG	0.116283	<0.001	0.002	1.00 (0.93, 1.09)	0.91	0.93	0	/
Total phytosterol	HMDB0009012	C40:6 PE	0.116801	<0.001	0.002	1.32 (1.20, 1.45)	<0.001	<0.001	0	/
Total phytosterol	HMDB0011520	C22:0 LPE	0.127954	<0.001	<0.001	0.70 (0.64, 0.77)	<0.001	<0.001	1000	-0.066154
Total phytosterol	HMDB0005413	C58:8 TAG	0.130918	<0.001	<0.001	0.95 (0.87, 1.02)	0.17	0.22	0	/
Total phytosterol	HMDB0010404	C22:6 LPC	0.132477	<0.001	<0.001	0.84 (0.78, 0.90)	<0.001	<0.001	1	-0.00119847
Total phytosterol	HMDB0000875	Trigonelline	0.135961	<0.001	<0.001	0.82 (0.76, 0.89)	<0.001	<0.001	1000	-0.0417408
Total phytosterol	HMDB0007991	C38:6 PC	0.136237	<0.001	<0.001	0.92 (0.84, 1.00)	0.04	0.07	1000	-0.0687566
Total phytosterol	HMDB0006347	C26 carnitine	0.137479	<0.001	<0.001	1.11 (1.03, 1.19)	0.008	0.01	269	0.00838735
Total phytosterol	HMDB0008731	C40:9 PC	0.143341	<0.001	<0.001	0.90 (0.82, 0.97)	0.01	0.02	1000	-0.0581437
Total phytosterol	HMDB0000043	Betaine	0.148074	<0.001	<0.001	0.78 (0.72, 0.85)	<0.001	<0.001	935	-0.0453106
Total phytosterol	HMDB0005392	C56:8 TAG	0.157861	<0.001	<0.001	0.96 (0.89, 1.03)	0.26	0.33	135	0.0121248
Total phytosterol	HMDB0005478	C60:12 TAG	0.164919	<0.001	<0.001	0.92 (0.85, 0.99)	0.03	0.05	0	/
Total phytosterol	HMDB0006733	C22:6 CE	0.189213	<0.001	<0.001	0.66 (0.60, 0.72)	<0.001	<0.001	0	/
Total phytosterol	HMDB0005463	C58:9 TAG	0.194248	<0.001	<0.001	0.85 (0.79, 0.92)	<0.001	<0.001	0	/
Total phytosterol	HMDB0000714	Hippuric acid	0.194996	<0.001	<0.001	0.83 (0.77, 0.89)	<0.001	<0.001	998	-0.0186543
Total phytosterol	HMDB0004827	Proline betaine	0.245043	<0.001	<0.001	0.94 (0.87, 1.01)	0.07	0.1	0	/
Total phytosterol	HMDB0000716	L-Pipecolic acid	0.259284	<0.001	<0.001	1.12 (1.04, 1.20)	0.004	0.007	1	0.00319799
Total phytosterol	HMDB0003357	N-Acetylornithine	0.304281	<0.001	<0.001	0.95 (0.88, 1.02)	0.14	0.19	13	-0.00055039
b-Sitosterol	HMDB0011252	C38:4 PC plasmalogen	-0.179692	<0.001	<0.001	0.92 (0.86, 1.00)	0.04	0.07	0	/
b-Sitosterol	HMDB0010368	C18:0 CE	-0.154329	<0.001	<0.001	0.83 (0.77, 0.89)	<0.001	<0.001	420	0.0117376
b-Sitosterol	HMDB0008038	C36:1 PC	-0.151482	<0.001	<0.001	1.09 (1.02, 1.17)	0.008	0.01	0	/
b-Sitosterol	HMDB0004952	C22:0 Ceramide	-0.147199	<0.001	<0.001	1.28 (1.20, 1.37)	<0.001	<0.001	1000	0.0798117
b-Sitosterol	HMDB0000658	C16:1 CE	-0.146843	<0.001	<0.001	1.01 (0.94, 1.09)	0.8	0.84	0	/
b-Sitosterol	HMDB0005376	C48:2 TAG	-0.137863	<0.001	<0.001	1.56 (1.43, 1.71)	<0.001	<0.001	0	/
b-Sitosterol	HMDB0010419	C46:2 TAG	-0.135957	<0.001	<0.001	1.47 (1.35, 1.60)	<0.001	<0.001	0	/
b-Sitosterol	HMDB0010412	C46:1 TAG	-0.135676	<0.001	<0.001	1.52 (1.39, 1.65)	<0.001	<0.001	0	/
b-Sitosterol	HMDB0011517	C20:4 LPE	-0.131959	<0.001	<0.001	0.92 (0.85, 0.99)	0.02	0.03	272	-0.00622381
b-Sitosterol	HMDB0005432	C48:3 TAG	-0.13185	<0.001	<0.001	1.34 (1.25, 1.43)	<0.001	<0.001	1	-0.0144964
b-Sitosterol	HMDB0042063	C44:0 TAG	-0.131299	<0.001	<0.001	1.46 (1.35, 1.58)	<0.001	<0.001	0	/
b-Sitosterol	HMDB0011386	C38:5 PE plasmalogen	-0.130506	<0.001	<0.001	1.09 (1.01, 1.17)	0.02	0.03	700	0.0196335
b-Sitosterol	HMDB0010383	C16:1 LPC	-0.128076	<0.001	<0.001	1.02 (0.95, 1.10)	0.61	0.67	14	0.012788
b-Sitosterol	HMDB0007870	C30:1 PC	-0.126415	<0.001	<0.001	1.25 (1.16, 1.36)	<0.001	<0.001	0	/
b-Sitosterol	HMDB0011512	C20:1 LPE	-0.125685	<0.001	<0.001	0.83 (0.76, 0.90)	<0.001	<0.001	0	/
b-Sitosterol	HMDB0008048	C38:4 PC	-0.124005	<0.001	<0.001	1.13 (1.06, 1.22)	<0.001	0.001	0	/
b-Sitosterol	HMDB0011387	C38:6 PE plasmalogen	-0.122933	<0.001	0.001	1.07 (1.00, 1.15)	0.05	0.07	0	/
b-Sitosterol	HMDB0005365	C52:0 TAG	-0.121031	<0.001	<0.001	1.57 (1.45, 1.69)	<0.001	<0.001	0	/
b-Sitosterol	HMDB0008047	C38:3 PC	-0.12034	<0.001	<0.001	1.30 (1.22, 1.39)	<0.001	<0.001	1000	0.0846193
b-Sitosterol	HMDB0007873	C32:1 PC	-0.120073	<0.001	<0.001	1.31 (1.21, 1.41)	<0.001	<0.001	0	/
b-Sitosterol	HMDB0010411	C46:0 TAG	-0.11945	<0.001	0.001	1.56 (1.43, 1.69)	<0.001	<0.001	0	/
b-Sitosterol	HMDB0010403	C22:5 LPC	-0.1181	<0.001	0.001	0.89 (0.82, 0.97)	0.005	0.01	800	-0.0128627
b-Sitosterol	HMDB0031106	C51:0 TAG	-0.117334	<0.001	0.001	1.54 (1.42, 1.67)	<0.001	<0.001	21	0.00462189
b-Sitosterol	HMDB0002000	Myristoleic acid	-0.116038	<0.001	0.001	1.03 (0.96, 1.11)	0.39	0.46	733	0.00490896
b-Sitosterol	HMDB0042104	C51:1 TAG	-0.11595	<0.001	0.001	1.64 (1.51, 1.79)	<0.001	<0.001	1000	0.0398514
b-Sitosterol	HMDB0000725	4-Hydroxyproline	-0.115006	<0.001	0.003	1.02 (0.95, 1.10)	0.52	0.59	0	/
b-Sitosterol	HMDB0042099	C45:1 TAG	-0.112818	<0.001	0.002	1.40 (1.29, 1.51)	<0.001	<0.001	0	/
b-Sitosterol	HMDB0011103	1,7-Dimethyluric acid	-0.111392	<0.001	0.003	1.02 (0.94, 1.10)	0.62	0.69	0	/
b-Sitosterol	HMDB0005377	C50:2 TAG	-0.110937	<0.001	0.001	1.68 (1.54, 1.83)	<0.001	<0.001	0	/
b-Sitosterol	HMDB0042093	C45:0 TAG	-0.110849	<0.001	0.003	1.30 (1.21, 1.40)	<0.001	<0.001	2	0.00622676
b-Sitosterol	HMDB0006344	Phenylacetylglutamine	-0.110401	<0.001	0.003	0.88 (0.82, 0.94)	<0.001	<0.001	978	-0.0281718
b-Sitosterol	HMDB0007883	C34:4 PC	-0.109053	<0.001	0.002	1.25 (1.16, 1.36)	<0.001	<0.001	0	/
b-Sitosterol	HMDB0005923	N4-Acetylcytidine	-0.108416	<0.001	0.003	1.15 (1.07, 1.24)	<0.001	<0.001	1000	0.0357271
b-Sitosterol	HMDB0011705	C49:1 TAG	-0.108359	0.001	0.004	1.42 (1.31, 1.54)	<0.001	<0.001	0	/
b-Sitosterol	HMDB0042076	C47:2 TAG	-0.107463	<0.001	0.003	1.41 (1.30, 1.53)	<0.001	<0.001	0	/
b-Sitosterol	HMDB0005357	C50:0 TAG	-0.107347	<0.001	0.003	1.69 (1.56, 1.84)	<0.001	<0.001	473	0.000857686
b-Sitosterol	HMDB0005362	C51:2 TAG	-0.107255	<0.001	0.002	1.40 (1.28, 1.52)	<0.001	<0.001	0	/
b-Sitosterol	HMDB0005433	C50:3 TAG	-0.106693	<0.001	0.003	1.48 (1.37, 1.60)	<0.001	<0.001	0	/
b-Sitosterol	HMDB0009082	C36:2 PE plasmalogen	-0.105553	0.001	0.005	1.02 (0.95, 1.10)	0.52	0.59	0	/
b-Sitosterol	HMDB0005435	C50:4 TAG	-0.102365	<0.001	0.004	1.36 (1.25, 1.49)	<0.001	<0.001	0	/
b-Sitosterol	HMDB0042062	C43:0 TAG	-0.100917	0.002	0.006	1.31 (1.22, 1.41)	<0.001	<0.001	0	/
b-Sitosterol	HMDB0005359	C48:1 TAG	-0.100664	0.001	0.005	1.65 (1.52, 1.80)	<0.001	<0.001	0	/
b-Sitosterol	HMDB0005356	C48:0 TAG	-0.100409	0.001	0.005	1.68 (1.54, 1.83)	<0.001	<0.001	889	0.0334043
b-Sitosterol	HMDB0013238	C7 carnitine	-0.100226	0.002	0.008	1.04 (0.96, 1.12)	0.32	0.39	0	/
b-Sitosterol	HMDB0043170	C45:2 TAG	-0.0985013	0.002	0.007	1.49 (1.37, 1.62)	<0.001	<0.001	0	/
b-Sitosterol	HMDB0007972	C34:1 PC	-0.0973754	0.001	0.005	1.14 (1.06, 1.23)	<0.001	0.001	18	-0.00581946
b-Sitosterol	HMDB0042100	C47:1 TAG	-0.0959293	0.003	0.01	1.41 (1.29, 1.53)	<0.001	<0.001	0	/
b-Sitosterol	HMDB0000062	L-Carnitine	-0.0954958	0.003	0.01	1.09 (1.01, 1.17)	0.03	0.05	0	/
b-Sitosterol	HMDB0042098	C43:1 TAG	-0.0943665	0.004	0.01	1.43 (1.32, 1.55)	<0.001	<0.001	0	/
b-Sitosterol	HMDB0007099	C32:1 DAG	-0.0938341	0.003	0.01	1.75 (1.61, 1.91)	<0.001	<0.001	0	/
b-Sitosterol	HMDB0000767	Pseudouridine	-0.0937446	0.003	0.01	0.97 (0.90, 1.04)	0.41	0.49	686	-0.0452872
b-Sitosterol	HMDB0005360	C50:1 TAG	-0.0937291	0.002	0.008	1.84 (1.69, 2.01)	<0.001	<0.001	1000	0.0319092
b-Sitosterol	HMDB0010471	C50:5 TAG	-0.0932458	0.003	0.01	1.35 (1.24, 1.46)	<0.001	<0.001	0	/
b-Sitosterol	HMDB0008138	C36:4 PC-B	-0.0930546	0.002	0.007	1.13 (1.05, 1.22)	0.001	0.002	0	/
b-Sitosterol	HMDB0004949	C16:0 Ceramide	-0.0930335	0.004	0.01	1.11 (1.04, 1.19)	0.003	0.005	225	0.0030579
b-Sitosterol	HMDB0010370	C18:3 CE	-0.091717	0.004	0.01	0.81 (0.75, 0.87)	<0.001	<0.001	0	/
b-Sitosterol	HMDB0005367	C52:1 TAG	-0.0911262	0.003	0.01	1.58 (1.48, 1.69)	<0.001	<0.001	1000	0.0687752
b-Sitosterol	HMDB0001886	3-Methylxanthine	-0.0908311	0.004	0.01	0.97 (0.90, 1.05)	0.45	0.52	1	-0.0043781
b-Sitosterol	HMDB0000688	C5 carnitine	-0.08783	0.007	0.02	1.26 (1.18, 1.35)	<0.001	<0.001	1000	0.061755
b-Sitosterol	HMDB0005395	C54:1 TAG	-0.0870467	0.005	0.02	1.50 (1.39, 1.62)	<0.001	<0.001	0	/
b-Sitosterol	HMDB0009069	C38:5 PE	-0.0864533	0.006	0.02	1.12 (1.05, 1.19)	<0.001	0.002	0	/
b-Sitosterol	HMDB0011214	C34:5 PC plasmalogen	-0.0844864	0.01	0.03	1.07 (1.00, 1.15)	0.04	0.07	680	0.00916731
b-Sitosterol	HMDB0000705	Hexanoylcarnitine	-0.0844646	0.006	0.02	1.13 (1.04, 1.23)	0.004	0.008	27	0.0135372
b-Sitosterol	HMDB0007100	C34:0 DAG	-0.0842887	0.007	0.02	1.52 (1.43, 1.63)	<0.001	<0.001	0	/
b-Sitosterol	HMDB0010497	C50:6 TAG	-0.0841084	0.008	0.02	1.33 (1.23, 1.44)	<0.001	<0.001	0	/
b-Sitosterol	HMDB0001847	Caffeine	-0.0834312	0.007	0.02	1.06 (0.98, 1.15)	0.15	0.21	0	/
b-Sitosterol	HMDB0000182	L-Lysine	-0.0831949	0.007	0.02	1.20 (1.12, 1.29)	<0.001	<0.001	0	/
b-Sitosterol	HMDB0011410	C36:5 PE plasmalogen	-0.0822519	0.01	0.03	1.13 (1.06, 1.21)	<0.001	<0.001	1000	0.106275
b-Sitosterol	HMDB0011441	C36:3 PE plasmalogen	-0.0812957	0.01	0.03	0.95 (0.88, 1.02)	0.16	0.21	0	/
b-Sitosterol	HMDB0001991	7-Methylxanthine	-0.0806675	0.01	0.03	0.97 (0.90, 1.05)	0.44	0.51	0	/
b-Sitosterol	HMDB0011706	C49:2 TAG	-0.076035	0.02	0.04	1.35 (1.24, 1.46)	<0.001	<0.001	0	/
b-Sitosterol	HMDB0011220	C36:5 PC plasmalogen-B	-0.0756821	0.02	0.04	0.93 (0.86, 1.00)	0.06	0.09	0	/
b-Sitosterol	HMDB0007216	C36:1 DAG	-0.0756466	0.02	0.04	1.60 (1.48, 1.71)	<0.001	<0.001	12	0.00193567
b-Sitosterol	HMDB0010379	C14:0 LPC	-0.0751863	0.02	0.04	1.18 (1.10, 1.26)	<0.001	<0.001	0	/
b-Sitosterol	HMDB0000167	L-Threonine	-0.073341	0.01	0.04	1.03 (0.95, 1.12)	0.43	0.5	13	0.00428015
b-Sitosterol	HMDB0012101	C18:1 SM	-0.0728433	0.01	0.04	0.85 (0.79, 0.92)	<0.001	<0.001	976	0.0215911
b-Sitosterol	HMDB0011442	C36:4 PE plasmalogen	-0.0725277	0.03	0.07	0.95 (0.88, 1.02)	0.19	0.25	0	/
b-Sitosterol	HMDB0008006	C34:3 PC	-0.0696172	0.02	0.05	1.11 (1.03, 1.19)	0.009	0.02	0	/
b-Sitosterol	HMDB0001859	Acetaminophen	-0.068699	0.04	0.08	1.03 (0.96, 1.10)	0.37	0.44	407	0.007133
b-Sitosterol	HMDB0042103	C49:3 TAG	-0.0686688	0.03	0.07	1.22 (1.14, 1.31)	<0.001	<0.001	14	-0.00797038
b-Sitosterol	HMDB0004824	N2,N2-Dimethylguanosine	-0.0672485	0.03	0.07	1.11 (1.04, 1.19)	0.002	0.003	977	0.03856
b-Sitosterol	HMDB0006736	C20:3 CE	-0.0667207	0.04	0.09	0.83 (0.77, 0.89)	<0.001	<0.001	7	0.00507073
b-Sitosterol	HMDB0005369	C52:2 TAG	-0.0666224	0.03	0.07	1.58 (1.46, 1.70)	<0.001	<0.001	0	/
b-Sitosterol	HMDB0008952	C34:2 PE plasmalogen	-0.0661371	0.04	0.09	1.02 (0.95, 1.10)	0.57	0.63	0	/
b-Sitosterol	HMDB0000064	Creatine	-0.066116	0.03	0.08	1.04 (0.97, 1.12)	0.29	0.36	14	-0.00580657
b-Sitosterol	HMDB0042196	C53:2 TAG	-0.0654039	0.04	0.08	1.22 (1.14, 1.31)	<0.001	<0.001	0	/
b-Sitosterol	HMDB0010395	C20:4 LPC	-0.0636632	0.05	0.1	0.90 (0.83, 0.96)	0.003	0.007	0	/
b-Sitosterol	HMDB0007869	C30:0 PC	-0.0609831	0.05	0.11	1.17 (1.09, 1.24)	<0.001	<0.001	0	/
b-Sitosterol	HMDB0000884	Ribothymidine	-0.0598909	0.07	0.13	0.92 (0.86, 0.99)	0.03	0.05	1	-0.00767878
b-Sitosterol	HMDB0008937	C36:4 PE	-0.0594686	0.05	0.11	1.21 (1.13, 1.29)	<0.001	<0.001	0	/
b-Sitosterol	HMDB0008105	C36:3 PC	-0.0586688	0.06	0.12	1.07 (0.99, 1.16)	0.07	0.1	0	/
b-Sitosterol	HMDB0011343	C34:3 PE plasmalogen	-0.0568311	0.09	0.17	0.98 (0.92, 1.06)	0.65	0.71	0	/
b-Sitosterol	HMDB0007102	C34:1 DAG	-0.0562669	0.07	0.14	1.70 (1.58, 1.84)	<0.001	<0.001	1000	0.16587
b-Sitosterol	HMDB0007011	C30:0 DAG	-0.0552292	0.09	0.17	1.60 (1.49, 1.73)	<0.001	<0.001	890	0.00562473
b-Sitosterol	HMDB0007103	C34:2 DAG	-0.0551813	0.08	0.15	1.61 (1.49, 1.74)	<0.001	<0.001	0	/
b-Sitosterol	HMDB0002250	C12 carnitine	-0.0549178	0.09	0.17	1.00 (0.92, 1.08)	0.97	0.97	55	-0.0117085
b-Sitosterol	HMDB0000824	Propionylcarnitine	-0.0539485	0.1	0.18	1.10 (1.03, 1.18)	0.003	0.006	421	-0.0122942
b-Sitosterol	HMDB0004953	C24:1 Ceramide	-0.0537732	0.09	0.17	1.06 (0.99, 1.14)	0.08	0.12	4	-0.00559745
b-Sitosterol	HMDB0001325	N6,N6,N6-Trimethyl-L-lysine	-0.0536282	0.1	0.18	1.03 (0.96, 1.11)	0.41	0.49	0	/
b-Sitosterol	HMDB0012097	C14:0 SM	-0.0524698	0.08	0.15	0.95 (0.88, 1.03)	0.19	0.25	5	-0.011929
b-Sitosterol	HMDB0007218	C36:2 DAG	-0.0520606	0.1	0.18	1.48 (1.38, 1.60)	<0.001	<0.001	0	/
b-Sitosterol	HMDB0007874	C32:2 PC	-0.0515089	0.1	0.18	1.20 (1.12, 1.28)	<0.001	<0.001	0	/
b-Sitosterol	HMDB0009003	C38:4 PE	-0.0508916	0.1	0.18	1.27 (1.20, 1.35)	<0.001	<0.001	0	/
b-Sitosterol	HMDB0007199	C38:5 DAG	-0.0498795	0.12	0.21	1.38 (1.28, 1.48)	<0.001	<0.001	0	/
b-Sitosterol	HMDB0000206	N6-Acetyl-L-lysine	-0.049007	0.12	0.22	0.95 (0.88, 1.03)	0.22	0.28	993	-0.0332684
b-Sitosterol	HMDB0000562	Creatinine	-0.0485355	0.13	0.22	0.87 (0.81, 0.94)	<0.001	<0.001	1000	-0.0791286
b-Sitosterol	HMDB0042226	C55:2 TAG	-0.0482211	0.13	0.22	1.42 (1.32, 1.53)	<0.001	<0.001	0	/
b-Sitosterol	HMDB0000898	1-Methylhistamine	-0.0476367	0.13	0.22	1.07 (0.99, 1.15)	0.1	0.14	182	0.007491
b-Sitosterol	HMDB0005396	C56:1 TAG	-0.0473211	0.13	0.22	1.39 (1.29, 1.49)	<0.001	<0.001	0	/
b-Sitosterol	HMDB0011384	C38:3 PE plasmalogen	-0.0472436	0.12	0.21	0.77 (0.72, 0.83)	<0.001	<0.001	0	/
b-Sitosterol	HMDB0005384	C52:3 TAG	-0.0465329	0.14	0.23	1.37 (1.27, 1.49)	<0.001	<0.001	0	/
b-Sitosterol	HMDB0007098	C32:0 DAG	-0.0462933	0.14	0.23	1.66 (1.55, 1.79)	<0.001	<0.001	894	0.0149688
b-Sitosterol	HMDB0005458	C58:6 TAG	-0.045948	0.14	0.23	1.07 (0.99, 1.15)	0.11	0.15	0	/
b-Sitosterol	HMDB0011507	C18:2 LPE	-0.0447725	0.16	0.26	0.90 (0.84, 0.97)	0.006	0.01	1	-0.0133346
b-Sitosterol	HMDB0002013	C4 carnitine	-0.0443746	0.18	0.28	1.08 (1.01, 1.16)	0.03	0.05	0	/
b-Sitosterol	HMDB0059824	4-Hydroxy-3-methylacetophenone	-0.0422185	0.16	0.26	1.04 (0.96, 1.13)	0.33	0.4	0	/
b-Sitosterol	HMDB0008270	C38:2 PC	-0.0411341	0.19	0.29	1.04 (0.97, 1.12)	0.24	0.3	0	/
b-Sitosterol	HMDB0000904	Citrulline	-0.0406821	0.21	0.31	0.93 (0.86, 1.00)	0.06	0.09	4	0.00930729
b-Sitosterol	HMDB0001348	C18:0 SM	-0.0405823	0.19	0.29	0.97 (0.90, 1.04)	0.34	0.41	838	0.00426888
b-Sitosterol	HMDB0000479	3-Methylhistidine	-0.0399978	0.18	0.28	0.98 (0.91, 1.07)	0.67	0.73	2	-0.00496824
b-Sitosterol	HMDB0000162	L-Proline	-0.0398588	0.21	0.31	1.19 (1.11, 1.28)	<0.001	<0.001	255	0.00589416
b-Sitosterol	HMDB0000791	L-Octanoylcarnitine	-0.0398404	0.21	0.31	0.99 (0.92, 1.08)	0.89	0.92	1	-0.0301821
b-Sitosterol	HMDB0004956	C24:0 Ceramide	-0.0392429	0.22	0.32	1.20 (1.12, 1.28)	<0.001	<0.001	0	/
b-Sitosterol	HMDB0003282	1-Methylguanine	-0.0392089	0.21	0.31	1.01 (0.93, 1.08)	0.89	0.91	0	/
b-Sitosterol	HMDB0000161	L-Alanine	-0.0382137	0.24	0.35	1.45 (1.35, 1.57)	<0.001	<0.001	1000	0.254442
b-Sitosterol	HMDB0012102	C20:0 SM	-0.0373672	0.23	0.33	1.00 (0.92, 1.08)	0.93	0.94	0	/
b-Sitosterol	HMDB0000897	7-Methylguanine	-0.0373066	0.25	0.36	1.12 (1.04, 1.20)	0.002	0.004	0	/
b-Sitosterol	HMDB0005436	C52:6 TAG	-0.0368758	0.24	0.35	1.21 (1.12, 1.31)	<0.001	<0.001	0	/
b-Sitosterol	HMDB0000715	Kynurenic acid	-0.036054	0.24	0.35	1.07 (0.99, 1.15)	0.11	0.16	0	/
b-Sitosterol	HMDB0011701	C51:3 TAG	-0.0355093	0.25	0.36	1.23 (1.13, 1.34)	<0.001	<0.001	0	/
b-Sitosterol	HMDB0007132	C34:3 DAG	-0.034702	0.29	0.4	1.59 (1.45, 1.73)	<0.001	<0.001	0	/
b-Sitosterol	HMDB0011243	C36:2 PC plasmalogen	-0.0346302	0.28	0.39	0.68 (0.62, 0.74)	<0.001	<0.001	1	-0.00139535
b-Sitosterol	HMDB0008923	C32:0 PE	-0.03402	0.28	0.4	1.12 (1.04, 1.21)	0.004	0.008	0	/
b-Sitosterol	HMDB0000158	L-Tyrosine	-0.0333962	0.3	0.42	1.31 (1.23, 1.40)	<0.001	<0.001	1000	0.0916082
b-Sitosterol	HMDB0008928	C34:2 PE	-0.0329508	0.3	0.42	1.25 (1.17, 1.33)	<0.001	<0.001	1	0.00157532
b-Sitosterol	HMDB0001046	Cotinine	-0.0313733	0.13	0.22	1.02 (0.91, 1.14)	0.76	0.81	2	0.00256929
b-Sitosterol	HMDB0006725	C14:0 CE	-0.0309231	0.31	0.43	0.91 (0.84, 0.99)	0.02	0.03	887	-0.0322855
b-Sitosterol	HMDB0005380	C52:5 TAG	-0.0297608	0.34	0.46	1.08 (1.00, 1.17)	0.06	0.08	0	/
b-Sitosterol	HMDB0011244	C36:3 PC plasmalogen-A	-0.028738	0.37	0.5	0.71 (0.67, 0.77)	<0.001	<0.001	1000	-0.047628
b-Sitosterol	HMDB0001563	1-Methylguanosine	-0.028646	0.38	0.5	1.22 (1.14, 1.31)	<0.001	<0.001	1000	0.0938988
b-Sitosterol	HMDB0005403	C54:2 TAG	-0.0259426	0.41	0.54	1.34 (1.26, 1.42)	<0.001	<0.001	0	/
b-Sitosterol	HMDB0010375	C22:5 CE	-0.0253696	0.45	0.58	0.76 (0.73, 0.80)	<0.001	<0.001	990	-0.00759042
b-Sitosterol	HMDB0000651	Decanoylcarnitine	-0.0248846	0.43	0.57	0.99 (0.91, 1.07)	0.76	0.81	0	/
b-Sitosterol	HMDB0011506	C18:1 LPE	-0.0232215	0.48	0.6	0.91 (0.84, 0.98)	0.02	0.03	1	-0.0186852
b-Sitosterol	HMDB0000631	Deoxycholic acid glycine conjugate	-0.0228823	0.45	0.58	1.15 (1.06, 1.25)	<0.001	0.001	273	0.00498851
b-Sitosterol	HMDB0004620	N-a-Acetyl-L-arginine	-0.0226841	0.46	0.59	1.02 (0.95, 1.10)	0.6	0.66	1	0.00106136
b-Sitosterol	HMDB0005456	C56:6 TAG	-0.0221069	0.5	0.63	1.00 (0.93, 1.07)	0.96	0.97	0	/
b-Sitosterol	HMDB0000925	Trimethylamine N-oxide	-0.0213086	0.53	0.65	1.02 (0.95, 1.10)	0.53	0.6	171	0.00975267
b-Sitosterol	HMDB0000462	Allantoin	-0.0202101	0.52	0.64	1.03 (0.96, 1.11)	0.46	0.53	0	/
b-Sitosterol	HMDB0005066	C14 carnitine	-0.0186491	0.57	0.68	1.09 (1.01, 1.17)	0.03	0.05	0	/
b-Sitosterol	HMDB0011478	C18:3 LPE	-0.0185067	0.56	0.67	0.98 (0.91, 1.06)	0.63	0.69	997	-0.0217195
b-Sitosterol	HMDB0013326	C12:1 carnitine	-0.0182942	0.58	0.68	0.95 (0.88, 1.03)	0.2	0.26	567	-0.0246442
b-Sitosterol	HMDB0002815	C18:1 LPC	-0.0166293	0.59	0.7	0.77 (0.70, 0.84)	<0.001	<0.001	0	/
b-Sitosterol	HMDB0043058	C53:3 TAG	-0.0143043	0.65	0.75	1.01 (0.94, 1.09)	0.78	0.83	11	-0.00239647
b-Sitosterol	HMDB0005406	C56:5 TAG	-0.0135841	0.68	0.77	1.01 (0.94, 1.08)	0.79	0.83	0	/
b-Sitosterol	HMDB0008994	C36:2 PE	-0.0134455	0.67	0.77	1.28 (1.21, 1.36)	<0.001	<0.001	0	/
b-Sitosterol	HMDB0000172	L-Isoleucine	-0.0133233	0.68	0.78	1.26 (1.20, 1.33)	<0.001	<0.001	0	/
b-Sitosterol	HMDB0008993	C36:1 PE	-0.0127712	0.68	0.77	1.40 (1.30, 1.52)	<0.001	<0.001	0	/
b-Sitosterol	HMDB0006726	C20:4 CE	-0.0126162	0.7	0.78	0.75 (0.70, 0.80)	<0.001	<0.001	0	/
b-Sitosterol	HMDB0002366	C5:1 carnitine	-0.0124216	0.7	0.78	1.10 (1.02, 1.18)	0.01	0.02	102	-0.00349833
b-Sitosterol	HMDB0013287	Ne,Ne dimethyllysine	-0.00938377	0.77	0.85	0.99 (0.92, 1.06)	0.7	0.75	0	/
b-Sitosterol	HMDB0000063	Cortisol	-0.00746908	0.81	0.88	0.98 (0.90, 1.05)	0.53	0.59	14	-0.00162971
b-Sitosterol	HMDB0008991	C36:0 PE	-0.00497105	0.87	0.95	0.97 (0.90, 1.05)	0.45	0.52	0	/
b-Sitosterol	HMDB0010517	C52:7 TAG	-0.00437421	0.89	0.96	1.19 (1.11, 1.27)	<0.001	<0.001	0	/
b-Sitosterol	HMDB0003681	4-Acetamidobutanoic acid	-0.0037666	0.9	0.96	0.95 (0.88, 1.02)	0.15	0.21	0	/
b-Sitosterol	HMDB0013288	C9 carnitine	-0.00257447	0.94	0.98	1.03 (0.95, 1.11)	0.5	0.58	0	/
b-Sitosterol	HMDB0000918	C18:1 CE	-0.00234219	0.94	0.98	0.68 (0.63, 0.73)	<0.001	<0.001	0	/
b-Sitosterol	HMDB0000687	L-Leucine	-0.00129823	0.97	0.99	1.28 (1.21, 1.34)	<0.001	<0.001	0	/
b-Sitosterol	HMDB0009060	C36:3 PE	-0.000893368	0.98	0.99	1.16 (1.09, 1.24)	<0.001	<0.001	5	0.0106934
b-Sitosterol	HMDB0000641	L-Glutamine	-0.000823972	0.98	0.99	0.89 (0.83, 0.96)	0.003	0.006	936	-0.00422016
b-Sitosterol	HMDB0005404	C56:2 TAG	-0.000374931	0.99	0.99	1.35 (1.26, 1.45)	<0.001	<0.001	0	/
b-Sitosterol	HMDB0000128	Guanidoacetic acid	-6.24623e-05	1	1	0.93 (0.86, 1.00)	0.05	0.08	150	0.012483
b-Sitosterol	HMDB0002014	C14:1 carnitine	0.000642953	0.98	0.99	0.95 (0.88, 1.03)	0.2	0.26	1	-0.0129075
b-Sitosterol	HMDB0000177	L-Histidine	0.00097077	0.98	0.99	1.01 (0.94, 1.09)	0.75	0.81	696	-0.0238516
b-Sitosterol	HMDB0010384	C18:0 LPC	0.00111922	0.97	0.99	0.93 (0.86, 1.00)	0.06	0.09	0	/
b-Sitosterol	HMDB0010382	C16:0 LPC	0.00116578	0.97	0.99	0.98 (0.91, 1.05)	0.53	0.59	0	/
b-Sitosterol	HMDB0013325	C10:2 carnitine	0.0017066	0.96	0.99	1.08 (0.99, 1.17)	0.08	0.11	707	0.0341013
b-Sitosterol	HMDB0011221	C36:5 PC plasmalogen-A	0.00226322	0.94	0.98	0.95 (0.87, 1.03)	0.19	0.25	0	/
b-Sitosterol	HMDB0029377	Piperine	0.00261428	0.93	0.98	1.16 (1.07, 1.26)	<0.001	<0.001	700	0.0104845
b-Sitosterol	HMDB0000301	Urocanic acid	0.00265313	0.94	0.98	1.06 (0.99, 1.13)	0.1	0.14	683	0.0100393
b-Sitosterol	HMDB0004193	N1-Methyl-2-pyridone-5-carboxamide	0.00337059	0.91	0.97	1.04 (0.96, 1.12)	0.34	0.42	1	0.0112163
b-Sitosterol	HMDB0000289	Uric acid	0.00373107	0.9	0.96	1.29 (1.21, 1.38)	<0.001	<0.001	1000	0.0538055
b-Sitosterol	HMDB0000026	Ureidopropionic acid	0.00415229	0.9	0.96	1.12 (1.04, 1.20)	0.002	0.003	1	0.00413514
b-Sitosterol	HMDB0011130	C18:0 LPE	0.00454521	0.88	0.95	1.00 (0.94, 1.07)	0.97	0.97	1	-0.000743083
b-Sitosterol	HMDB0011310	C36:4 PC plasmalogen	0.00465299	0.88	0.95	0.75 (0.69, 0.81)	<0.001	<0.001	0	/
b-Sitosterol	HMDB0002802	Cortisone	0.00815164	0.8	0.87	1.04 (0.96, 1.13)	0.29	0.37	0	/
b-Sitosterol	HMDB0000696	L-Methionine	0.00872799	0.8	0.87	1.08 (1.01, 1.15)	0.03	0.05	269	-0.0136931
b-Sitosterol	HMDB0001539	ADMA	0.00944069	0.75	0.84	1.03 (0.96, 1.12)	0.42	0.49	0	/
b-Sitosterol	HMDB0000201	L-Acetylcarnitine	0.0113569	0.73	0.81	1.02 (0.94, 1.09)	0.68	0.73	0	/
b-Sitosterol	HMDB0008039	C36:2 PC	0.0118197	0.72	0.8	1.06 (0.99, 1.14)	0.09	0.13	0	/
b-Sitosterol	HMDB0000248	Thyroxine	0.0125812	0.69	0.78	0.92 (0.85, 0.99)	0.03	0.04	887	-0.0317891
b-Sitosterol	HMDB0010169	C16:0 SM	0.0152224	0.63	0.73	0.77 (0.71, 0.83)	<0.001	<0.001	0	/
b-Sitosterol	HMDB0000991	2-Aminooctanoic acid	0.0165823	0.61	0.71	0.96 (0.89, 1.04)	0.33	0.4	0	/
b-Sitosterol	HMDB0000699	1-Methylnicotinamide	0.0166589	0.61	0.71	0.99 (0.92, 1.07)	0.84	0.88	114	-0.00150964
b-Sitosterol	HMDB0013130	C5-DC carnitine	0.0170354	0.61	0.71	0.91 (0.85, 0.98)	0.01	0.03	808	-0.0181962
b-Sitosterol	HMDB0000883	L-Valine	0.0172612	0.59	0.7	1.37 (1.29, 1.45)	<0.001	<0.001	1000	0.102436
b-Sitosterol	HMDB0000259	Serotonin	0.0177456	0.55	0.67	0.95 (0.88, 1.03)	0.2	0.26	0	/
b-Sitosterol	HMDB0004030	21-Deoxycortisol	0.0187335	0.54	0.66	0.91 (0.84, 0.98)	0.01	0.02	993	-0.0322908
b-Sitosterol	HMDB0008925	C34:0 PE	0.0188518	0.56	0.67	1.07 (1.00, 1.15)	0.04	0.07	1	0.0189619
b-Sitosterol	HMDB0005385	C54:5 TAG	0.0189513	0.57	0.68	1.09 (1.03, 1.16)	0.003	0.007	0	/
b-Sitosterol	HMDB0010397	C20:5 LPC	0.0192814	0.55	0.67	0.79 (0.72, 0.86)	<0.001	<0.001	0	/
b-Sitosterol	HMDB0010407	C16:1 LPC plasmalogen	0.0195638	0.51	0.63	0.75 (0.69, 0.83)	<0.001	<0.001	0	/
b-Sitosterol	HMDB0013331	C14:2 carnitine	0.0209282	0.52	0.64	0.95 (0.88, 1.02)	0.16	0.22	0	/
b-Sitosterol	HMDB0005363	C52:4 TAG	0.0217544	0.49	0.62	1.19 (1.09, 1.29)	<0.001	<0.001	0	/
b-Sitosterol	HMDB0000112	GABA	0.0222181	0.46	0.59	1.12 (1.05, 1.20)	0.001	0.003	0	/
b-Sitosterol	HMDB0011211	C34:3 PC plasmalogen	0.0230946	0.47	0.6	0.70 (0.64, 0.76)	<0.001	<0.001	920	-0.0290035
b-Sitosterol	HMDB0007219	C36:3 DAG	0.0231145	0.47	0.6	1.22 (1.15, 1.28)	<0.001	<0.001	0	/
b-Sitosterol	HMDB0010386	C18:2 LPC	0.0237247	0.45	0.58	0.73 (0.66, 0.80)	<0.001	<0.001	1000	-0.112765
b-Sitosterol	HMDB0005405	C54:3 TAG	0.0268205	0.41	0.54	1.11 (1.03, 1.19)	0.005	0.009	0	/
b-Sitosterol	HMDB0009016	C36:1 PE plasmalogen	0.0271691	0.37	0.5	0.69 (0.64, 0.76)	<0.001	<0.001	0	/
b-Sitosterol	HMDB0011503	C16:0 LPE	0.0274204	0.37	0.5	0.95 (0.87, 1.02)	0.16	0.21	1000	-0.0938891
b-Sitosterol	HMDB0007871	C32:0 PC	0.0291315	0.34	0.47	1.08 (1.00, 1.16)	0.06	0.09	0	/
b-Sitosterol	HMDB0012356	C34:0 PS	0.0320106	0.31	0.43	1.07 (0.99, 1.15)	0.08	0.12	0	/
b-Sitosterol	HMDB0005410	C56:3 TAG	0.0323663	0.31	0.43	1.27 (1.18, 1.37)	<0.001	<0.001	0	/
b-Sitosterol	HMDB0000885	C16:0 CE	0.0327547	0.31	0.43	0.70 (0.66, 0.75)	<0.001	<0.001	0	/
b-Sitosterol	HMDB0029416	L-Targinine	0.0427323	0.16	0.26	1.19 (1.11, 1.27)	<0.001	<0.001	811	0.0247696
b-Sitosterol	HMDB0007983	C36:4 PC-A	0.0445608	0.18	0.27	0.90 (0.84, 0.97)	0.003	0.007	1000	-0.0705718
b-Sitosterol	HMDB0005471	C58:7 TAG	0.0451105	0.17	0.26	0.92 (0.86, 0.99)	0.02	0.04	927	-0.0248557
b-Sitosterol	HMDB0042466	C55:3 TAG	0.0453095	0.16	0.26	0.91 (0.85, 0.98)	0.02	0.03	0	/
b-Sitosterol	HMDB0000159	L-Phenylalanine	0.0456061	0.17	0.26	1.19 (1.12, 1.26)	<0.001	<0.001	499	0.012215
b-Sitosterol	HMDB0000092	Dimethylglycine	0.0461633	0.15	0.24	1.00 (0.93, 1.07)	0.92	0.94	1	-0.00509167
b-Sitosterol	HMDB0007248	C36:4 DAG	0.0462903	0.15	0.24	1.21 (1.12, 1.31)	<0.001	<0.001	0	/
b-Sitosterol	HMDB0005398	C56:4 TAG	0.0468221	0.15	0.24	1.02 (0.95, 1.10)	0.56	0.63	0	/
b-Sitosterol	HMDB0007973	C34:2 PC	0.047973	0.12	0.2	1.11 (1.03, 1.20)	0.006	0.01	0	/
b-Sitosterol	HMDB0000054	Bilirubin	0.0513441	0.11	0.2	0.97 (0.91, 1.05)	0.46	0.53	0	/
b-Sitosterol	HMDB0011210	C34:2 PC plasmalogen	0.0522116	0.1	0.18	0.69 (0.65, 0.73)	<0.001	<0.001	1000	-0.121139
b-Sitosterol	HMDB0000123	Glycine	0.0558782	0.05	0.11	0.74 (0.68, 0.81)	<0.001	<0.001	1000	-0.0370618
b-Sitosterol	HMDB0005370	C54:4 TAG	0.0598018	0.06	0.12	0.95 (0.89, 1.03)	0.21	0.27	0	/
b-Sitosterol	HMDB0000235	Thiamine	0.0601148	0.04	0.08	0.89 (0.82, 0.97)	0.01	0.02	0	/
b-Sitosterol	HMDB0000929	L-Tryptophan	0.0602851	0.07	0.14	1.10 (1.03, 1.18)	0.003	0.006	0	/
b-Sitosterol	HMDB0005447	C54:7 TAG	0.0607194	0.06	0.11	1.06 (0.98, 1.14)	0.15	0.2	0	/
b-Sitosterol	HMDB0001906	2-Aminoisobutyric acid	0.0629885	0.06	0.12	0.93 (0.87, 1.00)	0.04	0.07	469	-0.00520656
b-Sitosterol	HMDB0001008	Biliverdin	0.0632783	0.05	0.11	0.96 (0.89, 1.03)	0.23	0.3	558	-0.00755182
b-Sitosterol	HMDB0000630	Cytosine	0.0648662	0.05	0.11	1.01 (0.94, 1.08)	0.87	0.9	0	/
b-Sitosterol	HMDB0010498	C54:9 TAG	0.0651535	0.05	0.1	1.11 (1.02, 1.20)	0.01	0.02	0	/
b-Sitosterol	HMDB0013127	C4-OH carnitine	0.0656168	0.04	0.09	1.20 (1.11, 1.30)	<0.001	<0.001	1000	0.116759
b-Sitosterol	HMDB0001565	Phosphocholine	0.0669129	0.02	0.04	0.94 (0.86, 1.02)	0.14	0.19	842	-0.0147396
b-Sitosterol	HMDB0005391	C54:6 TAG	0.0698128	0.03	0.07	0.99 (0.92, 1.07)	0.81	0.84	0	/
b-Sitosterol	HMDB0011229	C38:7 PC plasmalogen	0.0713149	0.02	0.06	0.87 (0.81, 0.94)	<0.001	0.001	0	/
b-Sitosterol	HMDB0000168	L-Asparagine	0.0714277	0.02	0.05	0.83 (0.76, 0.90)	<0.001	<0.001	1000	-0.194886
b-Sitosterol	HMDB0011208	C34:1 PC plasmalogen	0.0728681	0.02	0.06	0.72 (0.66, 0.78)	<0.001	<0.001	0	/
b-Sitosterol	HMDB0000187	L-Serine	0.0737732	0.01	0.03	0.84 (0.77, 0.92)	<0.001	<0.001	4	0.010353
b-Sitosterol	HMDB0011394	C40:7 PE plasmalogen	0.075493	0.02	0.04	0.96 (0.88, 1.03)	0.27	0.34	0	/
b-Sitosterol	HMDB0010518	C54:8 TAG	0.0760499	0.02	0.04	1.11 (1.03, 1.20)	0.008	0.01	0	/
b-Sitosterol	HMDB0000210	Pantothenic acid	0.0767811	0.009	0.03	1.04 (0.96, 1.12)	0.38	0.46	0	/
b-Sitosterol	HMDB0000610	C18:2 CE	0.0819655	0.009	0.03	0.67 (0.63, 0.72)	<0.001	<0.001	0	/
b-Sitosterol	HMDB0008942	C38:2 PE	0.0827464	0.009	0.03	0.80 (0.74, 0.87)	<0.001	<0.001	0	/
b-Sitosterol	HMDB0001276	N1-Acetylspermidine	0.0841206	0.006	0.02	0.95 (0.87, 1.02)	0.16	0.22	30	0.00645149
b-Sitosterol	HMDB0006731	C20:5 CE	0.0920302	0.004	0.01	0.81 (0.76, 0.87)	<0.001	<0.001	0	/
b-Sitosterol	HMDB0010513	C56:10 TAG	0.0952228	0.003	0.01	1.04 (0.96, 1.12)	0.37	0.44	0	/
b-Sitosterol	HMDB0011420	C38:7 PE plasmalogen	0.0960467	0.002	0.007	1.05 (0.97, 1.14)	0.21	0.27	0	/
b-Sitosterol	HMDB0008057	C40:6 PC	0.099875	0.001	0.005	1.00 (0.92, 1.08)	0.96	0.97	0	/
b-Sitosterol	HMDB0013678	4-Hydroxyhippuric acid	0.101955	<0.001	0.004	0.90 (0.83, 0.97)	0.009	0.02	933	-0.0262096
b-Sitosterol	HMDB0012107	C24:1 SM	0.109243	<0.001	0.002	0.79 (0.73, 0.86)	<0.001	<0.001	0	/
b-Sitosterol	HMDB0009102	C38:6 PE	0.113831	<0.001	<0.001	1.17 (1.08, 1.27)	<0.001	<0.001	0	/
b-Sitosterol	HMDB0013713	N-acetyltryptophan	0.115837	<0.001	0.001	1.01 (0.94, 1.09)	0.78	0.83	0	/
b-Sitosterol	HMDB0008511	C40:10 PC	0.118137	<0.001	<0.001	0.87 (0.81, 0.94)	<0.001	0.001	9	-0.00530957
b-Sitosterol	HMDB0011526	C22:6 LPE	0.122478	<0.001	<0.001	0.91 (0.84, 0.98)	0.02	0.03	0	/
b-Sitosterol	HMDB0000875	Trigonelline	0.12306	<0.001	<0.001	0.82 (0.76, 0.89)	<0.001	<0.001	1000	-0.0417408
b-Sitosterol	HMDB0005462	C56:7 TAG	0.127047	<0.001	<0.001	1.08 (1.00, 1.17)	0.04	0.06	0	/
b-Sitosterol	HMDB0005448	C56:9 TAG	0.127521	<0.001	<0.001	1.01 (0.93, 1.09)	0.81	0.84	0	/
b-Sitosterol	HMDB0011520	C22:0 LPE	0.128197	<0.001	<0.001	0.70 (0.64, 0.77)	<0.001	<0.001	1000	-0.066154
b-Sitosterol	HMDB0009012	C40:6 PE	0.135491	<0.001	<0.001	1.32 (1.20, 1.45)	<0.001	<0.001	0	/
b-Sitosterol	HMDB0006347	C26 carnitine	0.136717	<0.001	<0.001	1.11 (1.03, 1.19)	0.008	0.01	269	0.00838735
b-Sitosterol	HMDB0010531	C58:11 TAG	0.140318	<0.001	<0.001	1.00 (0.93, 1.09)	0.91	0.93	0	/
b-Sitosterol	HMDB0000043	Betaine	0.149795	<0.001	<0.001	0.78 (0.72, 0.85)	<0.001	<0.001	935	-0.0453106
b-Sitosterol	HMDB0005413	C58:8 TAG	0.16041	<0.001	<0.001	0.95 (0.87, 1.02)	0.17	0.22	0	/
b-Sitosterol	HMDB0010404	C22:6 LPC	0.164011	<0.001	<0.001	0.84 (0.78, 0.90)	<0.001	<0.001	1	-0.00119847
b-Sitosterol	HMDB0007991	C38:6 PC	0.173907	<0.001	<0.001	0.92 (0.84, 1.00)	0.04	0.07	1000	-0.0687566
b-Sitosterol	HMDB0005392	C56:8 TAG	0.177373	<0.001	<0.001	0.96 (0.89, 1.03)	0.26	0.33	135	0.0121248
b-Sitosterol	HMDB0008731	C40:9 PC	0.1819	<0.001	<0.001	0.90 (0.82, 0.97)	0.01	0.02	1000	-0.0581437
b-Sitosterol	HMDB0005478	C60:12 TAG	0.197599	<0.001	<0.001	0.92 (0.85, 0.99)	0.03	0.05	0	/
b-Sitosterol	HMDB0000714	Hippuric acid	0.209212	<0.001	<0.001	0.83 (0.77, 0.89)	<0.001	<0.001	998	-0.0186543
b-Sitosterol	HMDB0006733	C22:6 CE	0.224749	<0.001	<0.001	0.66 (0.60, 0.72)	<0.001	<0.001	0	/
b-Sitosterol	HMDB0005463	C58:9 TAG	0.228719	<0.001	<0.001	0.85 (0.79, 0.92)	<0.001	<0.001	0	/
b-Sitosterol	HMDB0000716	L-Pipecolic acid	0.251597	<0.001	<0.001	1.12 (1.04, 1.20)	0.004	0.007	1	0.00319799
b-Sitosterol	HMDB0003357	N-Acetylornithine	0.315542	<0.001	<0.001	0.95 (0.88, 1.02)	0.14	0.19	13	-0.00055039
b-Sitosterol	HMDB0004827	Proline betaine	0.317233	<0.001	<0.001	0.94 (0.87, 1.01)	0.07	0.1	0	/
Campesterol	HMDB0008038	C36:1 PC	-0.185002	<0.001	<0.001	1.09 (1.02, 1.17)	0.008	0.01	0	/
Campesterol	HMDB0000658	C16:1 CE	-0.166846	<0.001	<0.001	1.01 (0.94, 1.09)	0.8	0.84	0	/
Campesterol	HMDB0007972	C34:1 PC	-0.149245	<0.001	<0.001	1.14 (1.06, 1.23)	<0.001	0.001	18	-0.00581946
Campesterol	HMDB0011512	C20:1 LPE	-0.145565	<0.001	<0.001	0.83 (0.76, 0.90)	<0.001	<0.001	0	/
Campesterol	HMDB0011387	C38:6 PE plasmalogen	-0.138994	<0.001	<0.001	1.07 (1.00, 1.15)	0.05	0.07	0	/
Campesterol	HMDB0000725	4-Hydroxyproline	-0.135428	<0.001	<0.001	1.02 (0.95, 1.10)	0.52	0.59	0	/
Campesterol	HMDB0011386	C38:5 PE plasmalogen	-0.135389	<0.001	<0.001	1.09 (1.01, 1.17)	0.02	0.03	700	0.0196335
Campesterol	HMDB0011221	C36:5 PC plasmalogen-A	-0.13132	<0.001	<0.001	0.95 (0.87, 1.03)	0.19	0.25	0	/
Campesterol	HMDB0007873	C32:1 PC	-0.130958	<0.001	<0.001	1.31 (1.21, 1.41)	<0.001	<0.001	0	/
Campesterol	HMDB0009082	C36:2 PE plasmalogen	-0.130469	<0.001	<0.001	1.02 (0.95, 1.10)	0.52	0.59	0	/
Campesterol	HMDB0042063	C44:0 TAG	-0.122607	<0.001	<0.001	1.46 (1.35, 1.58)	<0.001	<0.001	0	/
Campesterol	HMDB0010411	C46:0 TAG	-0.117388	<0.001	0.002	1.56 (1.43, 1.69)	<0.001	<0.001	0	/
Campesterol	HMDB0011252	C38:4 PC plasmalogen	-0.11728	<0.001	0.002	0.92 (0.86, 1.00)	0.04	0.07	0	/
Campesterol	HMDB0010383	C16:1 LPC	-0.115971	<0.001	0.001	1.02 (0.95, 1.10)	0.61	0.67	14	0.012788
Campesterol	HMDB0010412	C46:1 TAG	-0.112825	<0.001	0.002	1.52 (1.39, 1.65)	<0.001	<0.001	0	/
Campesterol	HMDB0007870	C30:1 PC	-0.110155	<0.001	0.002	1.25 (1.16, 1.36)	<0.001	<0.001	0	/
Campesterol	HMDB0012356	C34:0 PS	-0.109555	<0.001	0.003	1.07 (0.99, 1.15)	0.08	0.12	0	/
Campesterol	HMDB0005362	C51:2 TAG	-0.1057	<0.001	0.003	1.40 (1.28, 1.52)	<0.001	<0.001	0	/
Campesterol	HMDB0010403	C22:5 LPC	-0.105618	<0.001	0.004	0.89 (0.82, 0.97)	0.005	0.01	800	-0.0128627
Campesterol	HMDB0011410	C36:5 PE plasmalogen	-0.104573	<0.001	0.006	1.13 (1.06, 1.21)	<0.001	<0.001	1000	0.106275
Campesterol	HMDB0008048	C38:4 PC	-0.103544	<0.001	0.004	1.13 (1.06, 1.22)	<0.001	0.001	0	/
Campesterol	HMDB0005377	C50:2 TAG	-0.103514	<0.001	0.004	1.68 (1.54, 1.83)	<0.001	<0.001	0	/
Campesterol	HMDB0005376	C48:2 TAG	-0.102916	<0.001	0.005	1.56 (1.43, 1.71)	<0.001	<0.001	0	/
Campesterol	HMDB0010419	C46:2 TAG	-0.102272	<0.001	0.006	1.47 (1.35, 1.60)	<0.001	<0.001	0	/
Campesterol	HMDB0005356	C48:0 TAG	-0.101864	<0.001	0.005	1.68 (1.54, 1.83)	<0.001	<0.001	889	0.0334043
Campesterol	HMDB0005432	C48:3 TAG	-0.100868	<0.001	0.006	1.34 (1.25, 1.43)	<0.001	<0.001	1	-0.0144964
Campesterol	HMDB0005359	C48:1 TAG	-0.100018	<0.001	0.006	1.65 (1.52, 1.80)	<0.001	<0.001	0	/
Campesterol	HMDB0011705	C49:1 TAG	-0.0991932	0.001	0.01	1.42 (1.31, 1.54)	<0.001	<0.001	0	/
Campesterol	HMDB0011517	C20:4 LPE	-0.0989836	0.002	0.01	0.92 (0.85, 0.99)	0.02	0.03	272	-0.00622381
Campesterol	HMDB0005357	C50:0 TAG	-0.0973311	<0.001	0.007	1.69 (1.56, 1.84)	<0.001	<0.001	473	0.000857686
Campesterol	HMDB0008952	C34:2 PE plasmalogen	-0.0972265	0.002	0.01	1.02 (0.95, 1.10)	0.57	0.63	0	/
Campesterol	HMDB0042099	C45:1 TAG	-0.0960923	0.001	0.01	1.40 (1.29, 1.51)	<0.001	<0.001	0	/
Campesterol	HMDB0011214	C34:5 PC plasmalogen	-0.09588	0.002	0.01	1.07 (1.00, 1.15)	0.04	0.07	680	0.00916731
Campesterol	HMDB0005365	C52:0 TAG	-0.0945174	0.001	0.01	1.57 (1.45, 1.69)	<0.001	<0.001	0	/
Campesterol	HMDB0010368	C18:0 CE	-0.0940345	0.002	0.01	0.83 (0.77, 0.89)	<0.001	<0.001	420	0.0117376
Campesterol	HMDB0010379	C14:0 LPC	-0.0938204	0.002	0.01	1.18 (1.10, 1.26)	<0.001	<0.001	0	/
Campesterol	HMDB0042098	C43:1 TAG	-0.0928012	0.003	0.01	1.43 (1.32, 1.55)	<0.001	<0.001	0	/
Campesterol	HMDB0042104	C51:1 TAG	-0.0923346	0.002	0.01	1.64 (1.51, 1.79)	<0.001	<0.001	1000	0.0398514
Campesterol	HMDB0004952	C22:0 Ceramide	-0.091486	0.002	0.01	1.28 (1.20, 1.37)	<0.001	<0.001	1000	0.0798117
Campesterol	HMDB0005360	C50:1 TAG	-0.0912178	0.002	0.01	1.84 (1.69, 2.01)	<0.001	<0.001	1000	0.0319092
Campesterol	HMDB0011220	C36:5 PC plasmalogen-B	-0.0909221	0.003	0.01	0.93 (0.86, 1.00)	0.06	0.09	0	/
Campesterol	HMDB0005367	C52:1 TAG	-0.0899532	0.002	0.01	1.58 (1.48, 1.69)	<0.001	<0.001	1000	0.0687752
Campesterol	HMDB0042076	C47:2 TAG	-0.089345	0.003	0.01	1.41 (1.30, 1.53)	<0.001	<0.001	0	/
Campesterol	HMDB0000064	Creatine	-0.0890139	0.003	0.01	1.04 (0.97, 1.12)	0.29	0.36	14	-0.00580657
Campesterol	HMDB0011229	C38:7 PC plasmalogen	-0.0886176	0.003	0.01	0.87 (0.81, 0.94)	<0.001	0.001	0	/
Campesterol	HMDB0031106	C51:0 TAG	-0.0884429	0.003	0.01	1.54 (1.42, 1.67)	<0.001	<0.001	21	0.00462189
Campesterol	HMDB0007869	C30:0 PC	-0.0882307	0.003	0.01	1.17 (1.09, 1.24)	<0.001	<0.001	0	/
Campesterol	HMDB0043170	C45:2 TAG	-0.0880637	0.003	0.01	1.49 (1.37, 1.62)	<0.001	<0.001	0	/
Campesterol	HMDB0008047	C38:3 PC	-0.0864358	0.003	0.01	1.30 (1.22, 1.39)	<0.001	<0.001	1000	0.0846193
Campesterol	HMDB0008138	C36:4 PC-B	-0.0857969	0.002	0.01	1.13 (1.05, 1.22)	0.001	0.002	0	/
Campesterol	HMDB0042062	C43:0 TAG	-0.084677	0.005	0.02	1.31 (1.22, 1.41)	<0.001	<0.001	0	/
Campesterol	HMDB0000206	N6-Acetyl-L-lysine	-0.0842415	0.005	0.02	0.95 (0.88, 1.03)	0.22	0.28	993	-0.0332684
Campesterol	HMDB0001325	N6,N6,N6-Trimethyl-L-lysine	-0.0833979	0.007	0.03	1.03 (0.96, 1.11)	0.41	0.49	0	/
Campesterol	HMDB0000167	L-Threonine	-0.0832817	0.003	0.01	1.03 (0.95, 1.12)	0.43	0.5	13	0.00428015
Campesterol	HMDB0042093	C45:0 TAG	-0.0811133	0.008	0.03	1.30 (1.21, 1.40)	<0.001	<0.001	2	0.00622676
Campesterol	HMDB0001859	Acetaminophen	-0.0801392	0.01	0.04	1.03 (0.96, 1.10)	0.37	0.44	407	0.007133
Campesterol	HMDB0002000	Myristoleic acid	-0.07896	0.009	0.03	1.03 (0.96, 1.11)	0.39	0.46	733	0.00490896
Campesterol	HMDB0010395	C20:4 LPC	-0.0785117	0.009	0.03	0.90 (0.83, 0.96)	0.003	0.007	0	/
Campesterol	HMDB0004949	C16:0 Ceramide	-0.0777376	0.01	0.04	1.11 (1.04, 1.19)	0.003	0.005	225	0.0030579
Campesterol	HMDB0042100	C47:1 TAG	-0.0776322	0.01	0.04	1.41 (1.29, 1.53)	<0.001	<0.001	0	/
Campesterol	HMDB0007883	C34:4 PC	-0.0769162	0.007	0.03	1.25 (1.16, 1.36)	<0.001	<0.001	0	/
Campesterol	HMDB0001348	C18:0 SM	-0.0750274	0.01	0.04	0.97 (0.90, 1.04)	0.34	0.41	838	0.00426888
Campesterol	HMDB0029377	Piperine	-0.0748197	0.01	0.04	1.16 (1.07, 1.26)	<0.001	<0.001	700	0.0104845
Campesterol	HMDB0007216	C36:1 DAG	-0.0743351	0.01	0.04	1.60 (1.48, 1.71)	<0.001	<0.001	12	0.00193567
Campesterol	HMDB0007100	C34:0 DAG	-0.0738046	0.01	0.04	1.52 (1.43, 1.63)	<0.001	<0.001	0	/
Campesterol	HMDB0004953	C24:1 Ceramide	-0.0732564	0.02	0.05	1.06 (0.99, 1.14)	0.08	0.12	4	-0.00559745
Campesterol	HMDB0005395	C54:1 TAG	-0.0717353	0.02	0.05	1.50 (1.39, 1.62)	<0.001	<0.001	0	/
Campesterol	HMDB0007199	C38:5 DAG	-0.0702792	0.02	0.06	1.38 (1.28, 1.48)	<0.001	<0.001	0	/
Campesterol	HMDB0011420	C38:7 PE plasmalogen	-0.0701052	0.02	0.06	1.05 (0.97, 1.14)	0.21	0.27	0	/
Campesterol	HMDB0010497	C50:6 TAG	-0.0693615	0.02	0.07	1.33 (1.23, 1.44)	<0.001	<0.001	0	/
Campesterol	HMDB0005923	N4-Acetylcytidine	-0.0684756	0.02	0.07	1.15 (1.07, 1.24)	<0.001	<0.001	1000	0.0357271
Campesterol	HMDB0006725	C14:0 CE	-0.0681257	0.02	0.06	0.91 (0.84, 0.99)	0.02	0.03	887	-0.0322855
Campesterol	HMDB0005369	C52:2 TAG	-0.0668237	0.02	0.07	1.58 (1.46, 1.70)	<0.001	<0.001	0	/
Campesterol	HMDB0005406	C56:5 TAG	-0.0662754	0.03	0.09	1.01 (0.94, 1.08)	0.79	0.83	0	/
Campesterol	HMDB0042196	C53:2 TAG	-0.0660858	0.03	0.08	1.22 (1.14, 1.31)	<0.001	<0.001	0	/
Campesterol	HMDB0008057	C40:6 PC	-0.0660332	0.02	0.07	1.00 (0.92, 1.08)	0.96	0.97	0	/
Campesterol	HMDB0011706	C49:2 TAG	-0.0647127	0.03	0.09	1.35 (1.24, 1.46)	<0.001	<0.001	0	/
Campesterol	HMDB0007218	C36:2 DAG	-0.0639166	0.03	0.09	1.48 (1.38, 1.60)	<0.001	<0.001	0	/
Campesterol	HMDB0006736	C20:3 CE	-0.0638471	0.04	0.11	0.83 (0.77, 0.89)	<0.001	<0.001	7	0.00507073
Campesterol	HMDB0012101	C18:1 SM	-0.0634768	0.02	0.07	0.85 (0.79, 0.92)	<0.001	<0.001	976	0.0215911
Campesterol	HMDB0000767	Pseudouridine	-0.0633117	0.03	0.09	0.97 (0.90, 1.04)	0.41	0.49	686	-0.0452872
Campesterol	HMDB0007102	C34:1 DAG	-0.0629016	0.03	0.09	1.70 (1.58, 1.84)	<0.001	<0.001	1000	0.16587
Campesterol	HMDB0005458	C58:6 TAG	-0.0628322	0.03	0.09	1.07 (0.99, 1.15)	0.11	0.15	0	/
Campesterol	HMDB0005456	C56:6 TAG	-0.0625178	0.04	0.12	1.00 (0.93, 1.07)	0.96	0.97	0	/
Campesterol	HMDB0011103	1,7-Dimethyluric acid	-0.0623154	0.04	0.11	1.02 (0.94, 1.10)	0.62	0.69	0	/
Campesterol	HMDB0000182	L-Lysine	-0.0620958	0.03	0.09	1.20 (1.12, 1.29)	<0.001	<0.001	0	/
Campesterol	HMDB0000289	Uric acid	-0.0619865	0.03	0.09	1.29 (1.21, 1.38)	<0.001	<0.001	1000	0.0538055
Campesterol	HMDB0007099	C32:1 DAG	-0.0605741	0.04	0.11	1.75 (1.61, 1.91)	<0.001	<0.001	0	/
Campesterol	HMDB0011441	C36:3 PE plasmalogen	-0.0593507	0.05	0.13	0.95 (0.88, 1.02)	0.16	0.21	0	/
Campesterol	HMDB0007011	C30:0 DAG	-0.0580172	0.06	0.14	1.60 (1.49, 1.73)	<0.001	<0.001	890	0.00562473
Campesterol	HMDB0001847	Caffeine	-0.0580014	0.05	0.12	1.06 (0.98, 1.15)	0.15	0.21	0	/
Campesterol	HMDB0005433	C50:3 TAG	-0.0576321	0.05	0.13	1.48 (1.37, 1.60)	<0.001	<0.001	0	/
Campesterol	HMDB0003681	4-Acetamidobutanoic acid	-0.057538	0.05	0.13	0.95 (0.88, 1.02)	0.15	0.21	0	/
Campesterol	HMDB0010370	C18:3 CE	-0.057317	0.06	0.14	0.81 (0.75, 0.87)	<0.001	<0.001	0	/
Campesterol	HMDB0011394	C40:7 PE plasmalogen	-0.0573009	0.06	0.13	0.96 (0.88, 1.03)	0.27	0.34	0	/
Campesterol	HMDB0006731	C20:5 CE	-0.055945	0.07	0.15	0.81 (0.76, 0.87)	<0.001	<0.001	0	/
Campesterol	HMDB0007098	C32:0 DAG	-0.0557723	0.06	0.14	1.66 (1.55, 1.79)	<0.001	<0.001	894	0.0149688
Campesterol	HMDB0008991	C36:0 PE	-0.0551336	0.06	0.14	0.97 (0.90, 1.05)	0.45	0.52	0	/
Campesterol	HMDB0011503	C16:0 LPE	-0.0548327	0.06	0.14	0.95 (0.87, 1.02)	0.16	0.21	1000	-0.0938891
Campesterol	HMDB0000705	Hexanoylcarnitine	-0.0527885	0.07	0.15	1.13 (1.04, 1.23)	0.004	0.008	27	0.0135372
Campesterol	HMDB0008923	C32:0 PE	-0.0523108	0.08	0.17	1.12 (1.04, 1.21)	0.004	0.008	0	/
Campesterol	HMDB0010397	C20:5 LPC	-0.0518664	0.09	0.18	0.79 (0.72, 0.86)	<0.001	<0.001	0	/
Campesterol	HMDB0005396	C56:1 TAG	-0.0516994	0.08	0.17	1.39 (1.29, 1.49)	<0.001	<0.001	0	/
Campesterol	HMDB0007871	C32:0 PC	-0.0492643	0.09	0.18	1.08 (1.00, 1.16)	0.06	0.09	0	/
Campesterol	HMDB0002815	C18:1 LPC	-0.0461337	0.11	0.22	0.77 (0.70, 0.84)	<0.001	<0.001	0	/
Campesterol	HMDB0000925	Trimethylamine N-oxide	-0.0459879	0.15	0.27	1.02 (0.95, 1.10)	0.53	0.6	171	0.00975267
Campesterol	HMDB0010375	C22:5 CE	-0.0459313	0.15	0.27	0.76 (0.73, 0.80)	<0.001	<0.001	990	-0.00759042
Campesterol	HMDB0008937	C36:4 PE	-0.0449366	0.12	0.23	1.21 (1.13, 1.29)	<0.001	<0.001	0	/
Campesterol	HMDB0000062	L-Carnitine	-0.0440501	0.15	0.28	1.09 (1.01, 1.17)	0.03	0.05	0	/
Campesterol	HMDB0008270	C38:2 PC	-0.0439857	0.14	0.25	1.04 (0.97, 1.12)	0.24	0.3	0	/
Campesterol	HMDB0010471	C50:5 TAG	-0.0423163	0.15	0.28	1.35 (1.24, 1.46)	<0.001	<0.001	0	/
Campesterol	HMDB0004824	N2,N2-Dimethylguanosine	-0.0418872	0.16	0.28	1.11 (1.04, 1.19)	0.002	0.003	977	0.03856
Campesterol	HMDB0011526	C22:6 LPE	-0.0416477	0.17	0.3	0.91 (0.84, 0.98)	0.02	0.03	0	/
Campesterol	HMDB0042226	C55:2 TAG	-0.04097	0.17	0.3	1.42 (1.32, 1.53)	<0.001	<0.001	0	/
Campesterol	HMDB0000479	3-Methylhistidine	-0.0403518	0.16	0.28	0.98 (0.91, 1.07)	0.67	0.73	2	-0.00496824
Campesterol	HMDB0009003	C38:4 PE	-0.0385078	0.19	0.33	1.27 (1.20, 1.35)	<0.001	<0.001	0	/
Campesterol	HMDB0000884	Ribothymidine	-0.0383768	0.22	0.35	0.92 (0.86, 0.99)	0.03	0.05	1	-0.00767878
Campesterol	HMDB0006726	C20:4 CE	-0.0381951	0.21	0.35	0.75 (0.70, 0.80)	<0.001	<0.001	0	/
Campesterol	HMDB0006344	Phenylacetylglutamine	-0.0381814	0.21	0.35	0.88 (0.82, 0.94)	<0.001	<0.001	978	-0.0281718
Campesterol	HMDB0011384	C38:3 PE plasmalogen	-0.0379124	0.19	0.33	0.77 (0.72, 0.83)	<0.001	<0.001	0	/
Campesterol	HMDB0007103	C34:2 DAG	-0.0374304	0.21	0.35	1.61 (1.49, 1.74)	<0.001	<0.001	0	/
Campesterol	HMDB0009069	C38:5 PE	-0.0369688	0.21	0.35	1.12 (1.05, 1.19)	<0.001	0.002	0	/
Campesterol	HMDB0000897	7-Methylguanine	-0.0365211	0.23	0.37	1.12 (1.04, 1.20)	0.002	0.004	0	/
Campesterol	HMDB0013238	C7 carnitine	-0.0359822	0.24	0.38	1.04 (0.96, 1.12)	0.32	0.39	0	/
Campesterol	HMDB0011210	C34:2 PC plasmalogen	-0.0358009	0.23	0.37	0.69 (0.65, 0.73)	<0.001	<0.001	1000	-0.121139
Campesterol	HMDB0001046	Cotinine	-0.0356463	0.07	0.15	1.02 (0.91, 1.14)	0.76	0.81	2	0.00256929
Campesterol	HMDB0010382	C16:0 LPC	-0.0349987	0.24	0.38	0.98 (0.91, 1.05)	0.53	0.59	0	/
Campesterol	HMDB0010407	C16:1 LPC plasmalogen	-0.0345873	0.22	0.35	0.75 (0.69, 0.83)	<0.001	<0.001	0	/
Campesterol	HMDB0042103	C49:3 TAG	-0.0332449	0.26	0.41	1.22 (1.14, 1.31)	<0.001	<0.001	14	-0.00797038
Campesterol	HMDB0011130	C18:0 LPE	-0.032739	0.27	0.42	1.00 (0.94, 1.07)	0.97	0.97	1	-0.000743083
Campesterol	HMDB0010517	C52:7 TAG	-0.0321227	0.28	0.43	1.19 (1.11, 1.27)	<0.001	<0.001	0	/
Campesterol	HMDB0000918	C18:1 CE	-0.0318407	0.28	0.42	0.68 (0.63, 0.73)	<0.001	<0.001	0	/
Campesterol	HMDB0000898	1-Methylhistamine	-0.0315829	0.29	0.43	1.07 (0.99, 1.15)	0.1	0.14	182	0.007491
Campesterol	HMDB0004620	N-a-Acetyl-L-arginine	-0.031022	0.29	0.43	1.02 (0.95, 1.10)	0.6	0.66	1	0.00106136
Campesterol	HMDB0005403	C54:2 TAG	-0.0310219	0.3	0.44	1.34 (1.26, 1.42)	<0.001	<0.001	0	/
Campesterol	HMDB0012097	C14:0 SM	-0.0304946	0.28	0.42	0.95 (0.88, 1.03)	0.19	0.25	5	-0.011929
Campesterol	HMDB0007874	C32:2 PC	-0.0303433	0.3	0.44	1.20 (1.12, 1.28)	<0.001	<0.001	0	/
Campesterol	HMDB0009016	C36:1 PE plasmalogen	-0.030083	0.3	0.44	0.69 (0.64, 0.76)	<0.001	<0.001	0	/
Campesterol	HMDB0011442	C36:4 PE plasmalogen	-0.0300289	0.34	0.48	0.95 (0.88, 1.02)	0.19	0.25	0	/
Campesterol	HMDB0005435	C50:4 TAG	-0.0299956	0.3	0.44	1.36 (1.25, 1.49)	<0.001	<0.001	0	/
Campesterol	HMDB0010404	C22:6 LPC	-0.0298822	0.31	0.45	0.84 (0.78, 0.90)	<0.001	<0.001	1	-0.00119847
Campesterol	HMDB0011310	C36:4 PC plasmalogen	-0.0275795	0.35	0.49	0.75 (0.69, 0.81)	<0.001	<0.001	0	/
Campesterol	HMDB0011343	C34:3 PE plasmalogen	-0.0275511	0.38	0.52	0.98 (0.92, 1.06)	0.65	0.71	0	/
Campesterol	HMDB0011478	C18:3 LPE	-0.0273996	0.36	0.5	0.98 (0.91, 1.06)	0.63	0.69	997	-0.0217195
Campesterol	HMDB0007991	C38:6 PC	-0.0272577	0.34	0.48	0.92 (0.84, 1.00)	0.04	0.07	1000	-0.0687566
Campesterol	HMDB0011506	C18:1 LPE	-0.0270845	0.38	0.52	0.91 (0.84, 0.98)	0.02	0.03	1	-0.0186852
Campesterol	HMDB0008511	C40:10 PC	-0.0257787	0.38	0.52	0.87 (0.81, 0.94)	<0.001	0.001	9	-0.00530957
Campesterol	HMDB0000824	Propionylcarnitine	-0.0250012	0.42	0.56	1.10 (1.03, 1.18)	0.003	0.006	421	-0.0122942
Campesterol	HMDB0008731	C40:9 PC	-0.0227119	0.43	0.57	0.90 (0.82, 0.97)	0.01	0.02	1000	-0.0581437
Campesterol	HMDB0005471	C58:7 TAG	-0.0222478	0.47	0.61	0.92 (0.86, 0.99)	0.02	0.04	927	-0.0248557
Campesterol	HMDB0001886	3-Methylxanthine	-0.0221238	0.46	0.6	0.97 (0.90, 1.05)	0.45	0.52	1	-0.0043781
Campesterol	HMDB0005404	C56:2 TAG	-0.0215096	0.47	0.61	1.35 (1.26, 1.45)	<0.001	<0.001	0	/
Campesterol	HMDB0008925	C34:0 PE	-0.0208543	0.49	0.62	1.07 (1.00, 1.15)	0.04	0.07	1	0.0189619
Campesterol	HMDB0008006	C34:3 PC	-0.020811	0.47	0.61	1.11 (1.03, 1.19)	0.009	0.02	0	/
Campesterol	HMDB0004956	C24:0 Ceramide	-0.0182213	0.54	0.67	1.20 (1.12, 1.28)	<0.001	<0.001	0	/
Campesterol	HMDB0011244	C36:3 PC plasmalogen-A	-0.0166767	0.58	0.71	0.71 (0.67, 0.77)	<0.001	<0.001	1000	-0.047628
Campesterol	HMDB0012102	C20:0 SM	-0.016092	0.58	0.71	1.00 (0.92, 1.08)	0.93	0.94	0	/
Campesterol	HMDB0000161	L-Alanine	-0.0154738	0.61	0.74	1.45 (1.35, 1.57)	<0.001	<0.001	1000	0.254442
Campesterol	HMDB0010169	C16:0 SM	-0.0148879	0.61	0.74	0.77 (0.71, 0.83)	<0.001	<0.001	0	/
Campesterol	HMDB0000688	C5 carnitine	-0.0146261	0.64	0.75	1.26 (1.18, 1.35)	<0.001	<0.001	1000	0.061755
Campesterol	HMDB0005384	C52:3 TAG	-0.0140855	0.64	0.75	1.37 (1.27, 1.49)	<0.001	<0.001	0	/
Campesterol	HMDB0003282	1-Methylguanine	-0.0124113	0.67	0.78	1.01 (0.93, 1.08)	0.89	0.91	0	/
Campesterol	HMDB0010384	C18:0 LPC	-0.010986	0.71	0.8	0.93 (0.86, 1.00)	0.06	0.09	0	/
Campesterol	HMDB0013288	C9 carnitine	-0.0105658	0.73	0.82	1.03 (0.95, 1.11)	0.5	0.58	0	/
Campesterol	HMDB0008105	C36:3 PC	-0.00839369	0.78	0.86	1.07 (0.99, 1.16)	0.07	0.1	0	/
Campesterol	HMDB0002250	C12 carnitine	-0.00784544	0.8	0.88	1.00 (0.92, 1.08)	0.97	0.97	55	-0.0117085
Campesterol	HMDB0008993	C36:1 PE	-0.00733172	0.8	0.88	1.40 (1.30, 1.52)	<0.001	<0.001	0	/
Campesterol	HMDB0013287	Ne,Ne dimethyllysine	-0.00679977	0.83	0.9	0.99 (0.92, 1.06)	0.7	0.75	0	/
Campesterol	HMDB0011507	C18:2 LPE	-0.00667854	0.83	0.9	0.90 (0.84, 0.97)	0.006	0.01	1	-0.0133346
Campesterol	HMDB0010498	C54:9 TAG	-0.00638468	0.84	0.9	1.11 (1.02, 1.20)	0.01	0.02	0	/
Campesterol	HMDB0000162	L-Proline	-0.00564067	0.85	0.91	1.19 (1.11, 1.28)	<0.001	<0.001	255	0.00589416
Campesterol	HMDB0005436	C52:6 TAG	-0.00476093	0.87	0.92	1.21 (1.12, 1.31)	<0.001	<0.001	0	/
Campesterol	HMDB0000158	L-Tyrosine	-0.00453172	0.88	0.92	1.31 (1.23, 1.40)	<0.001	<0.001	1000	0.0916082
Campesterol	HMDB0000063	Cortisol	-0.0044312	0.88	0.92	0.98 (0.90, 1.05)	0.53	0.59	14	-0.00162971
Campesterol	HMDB0011701	C51:3 TAG	-0.00412543	0.89	0.92	1.23 (1.13, 1.34)	<0.001	<0.001	0	/
Campesterol	HMDB0000112	GABA	-0.0038968	0.89	0.92	1.12 (1.05, 1.20)	0.001	0.003	0	/
Campesterol	HMDB0000301	Urocanic acid	-0.00299165	0.92	0.95	1.06 (0.99, 1.13)	0.1	0.14	683	0.0100393
Campesterol	HMDB0010513	C56:10 TAG	-0.00162598	0.96	0.97	1.04 (0.96, 1.12)	0.37	0.44	0	/
Campesterol	HMDB0002013	C4 carnitine	-0.00129443	0.97	0.97	1.08 (1.01, 1.16)	0.03	0.05	0	/
Campesterol	HMDB0001991	7-Methylxanthine	-0.000597461	0.98	0.99	0.97 (0.90, 1.05)	0.44	0.51	0	/
Campesterol	HMDB0001563	1-Methylguanosine	0.000138031	1	1	1.22 (1.14, 1.31)	<0.001	<0.001	1000	0.0938988
Campesterol	HMDB0007132	C34:3 DAG	0.00163651	0.96	0.97	1.59 (1.45, 1.73)	<0.001	<0.001	0	/
Campesterol	HMDB0001539	ADMA	0.00182959	0.95	0.97	1.03 (0.96, 1.12)	0.42	0.49	0	/
Campesterol	HMDB0000172	L-Isoleucine	0.00193668	0.95	0.97	1.26 (1.20, 1.33)	<0.001	<0.001	0	/
Campesterol	HMDB0000631	Deoxycholic acid glycine conjugate	0.00207729	0.94	0.97	1.15 (1.06, 1.25)	<0.001	0.001	273	0.00498851
Campesterol	HMDB0013326	C12:1 carnitine	0.00326969	0.92	0.95	0.95 (0.88, 1.03)	0.2	0.26	567	-0.0246442
Campesterol	HMDB0004030	21-Deoxycortisol	0.00483352	0.87	0.92	0.91 (0.84, 0.98)	0.01	0.02	993	-0.0322908
Campesterol	HMDB0010386	C18:2 LPC	0.00524397	0.86	0.92	0.73 (0.66, 0.80)	<0.001	<0.001	1000	-0.112765
Campesterol	HMDB0005066	C14 carnitine	0.00535062	0.86	0.92	1.09 (1.01, 1.17)	0.03	0.05	0	/
Campesterol	HMDB0000904	Citrulline	0.00540797	0.86	0.92	0.93 (0.86, 1.00)	0.06	0.09	4	0.00930729
Campesterol	HMDB0009102	C38:6 PE	0.00546121	0.85	0.91	1.17 (1.08, 1.27)	<0.001	<0.001	0	/
Campesterol	HMDB0001276	N1-Acetylspermidine	0.0064084	0.82	0.9	0.95 (0.87, 1.02)	0.16	0.22	30	0.00645149
Campesterol	HMDB0011243	C36:2 PC plasmalogen	0.00721613	0.81	0.89	0.68 (0.62, 0.74)	<0.001	<0.001	1	-0.00139535
Campesterol	HMDB0000791	L-Octanoylcarnitine	0.0104147	0.73	0.82	0.99 (0.92, 1.08)	0.89	0.92	1	-0.0301821
Campesterol	HMDB0000991	2-Aminooctanoic acid	0.0104194	0.73	0.82	0.96 (0.89, 1.04)	0.33	0.4	0	/
Campesterol	HMDB0000562	Creatinine	0.0106567	0.73	0.82	0.87 (0.81, 0.94)	<0.001	<0.001	1000	-0.0791286
Campesterol	HMDB0009012	C40:6 PE	0.0109761	0.72	0.82	1.32 (1.20, 1.45)	<0.001	<0.001	0	/
Campesterol	HMDB0005413	C58:8 TAG	0.0111726	0.7	0.8	0.95 (0.87, 1.02)	0.17	0.22	0	/
Campesterol	HMDB0010531	C58:11 TAG	0.0113625	0.7	0.8	1.00 (0.93, 1.09)	0.91	0.93	0	/
Campesterol	HMDB0005410	C56:3 TAG	0.0124557	0.68	0.79	1.27 (1.18, 1.37)	<0.001	<0.001	0	/
Campesterol	HMDB0000883	L-Valine	0.0127673	0.68	0.78	1.37 (1.29, 1.45)	<0.001	<0.001	1000	0.102436
Campesterol	HMDB0000687	L-Leucine	0.0133658	0.67	0.78	1.28 (1.21, 1.34)	<0.001	<0.001	0	/
Campesterol	HMDB0013130	C5-DC carnitine	0.0136855	0.66	0.78	0.91 (0.85, 0.98)	0.01	0.03	808	-0.0181962
Campesterol	HMDB0000651	Decanoylcarnitine	0.0137873	0.65	0.76	0.99 (0.91, 1.07)	0.76	0.81	0	/
Campesterol	HMDB0000128	Guanidoacetic acid	0.0144088	0.63	0.75	0.93 (0.86, 1.00)	0.05	0.08	150	0.012483
Campesterol	HMDB0008928	C34:2 PE	0.014529	0.63	0.75	1.25 (1.17, 1.33)	<0.001	<0.001	1	0.00157532
Campesterol	HMDB0012107	C24:1 SM	0.0146799	0.62	0.74	0.79 (0.73, 0.86)	<0.001	<0.001	0	/
Campesterol	HMDB0005462	C56:7 TAG	0.0147426	0.63	0.75	1.08 (1.00, 1.17)	0.04	0.06	0	/
Campesterol	HMDB0000885	C16:0 CE	0.0198044	0.51	0.64	0.70 (0.66, 0.75)	<0.001	<0.001	0	/
Campesterol	HMDB0000026	Ureidopropionic acid	0.0200217	0.52	0.65	1.12 (1.04, 1.20)	0.002	0.003	1	0.00413514
Campesterol	HMDB0010518	C54:8 TAG	0.0201129	0.51	0.64	1.11 (1.03, 1.20)	0.008	0.01	0	/
Campesterol	HMDB0000696	L-Methionine	0.0201438	0.53	0.66	1.08 (1.01, 1.15)	0.03	0.05	269	-0.0136931
Campesterol	HMDB0008994	C36:2 PE	0.0209714	0.49	0.62	1.28 (1.21, 1.36)	<0.001	<0.001	0	/
Campesterol	HMDB0043058	C53:3 TAG	0.0210962	0.48	0.61	1.01 (0.94, 1.09)	0.78	0.83	11	-0.00239647
Campesterol	HMDB0005448	C56:9 TAG	0.0223525	0.45	0.6	1.01 (0.93, 1.09)	0.81	0.84	0	/
Campesterol	HMDB0000715	Kynurenic acid	0.0228424	0.43	0.56	1.07 (0.99, 1.15)	0.11	0.16	0	/
Campesterol	HMDB0000201	L-Acetylcarnitine	0.0230602	0.46	0.6	1.02 (0.94, 1.09)	0.68	0.73	0	/
Campesterol	HMDB0005478	C60:12 TAG	0.0246133	0.41	0.55	0.92 (0.85, 0.99)	0.03	0.05	0	/
Campesterol	HMDB0008039	C36:2 PC	0.0247741	0.42	0.56	1.06 (0.99, 1.14)	0.09	0.13	0	/
Campesterol	HMDB0011211	C34:3 PC plasmalogen	0.0251643	0.41	0.55	0.70 (0.64, 0.76)	<0.001	<0.001	920	-0.0290035
Campesterol	HMDB0005405	C54:3 TAG	0.0258792	0.4	0.54	1.11 (1.03, 1.19)	0.005	0.009	0	/
Campesterol	HMDB0029416	L-Targinine	0.026262	0.36	0.5	1.19 (1.11, 1.27)	<0.001	<0.001	811	0.0247696
Campesterol	HMDB0000641	L-Glutamine	0.0264707	0.39	0.54	0.89 (0.83, 0.96)	0.003	0.006	936	-0.00422016
Campesterol	HMDB0002802	Cortisone	0.0282683	0.35	0.49	1.04 (0.96, 1.13)	0.29	0.37	0	/
Campesterol	HMDB0000054	Bilirubin	0.0292344	0.34	0.48	0.97 (0.91, 1.05)	0.46	0.53	0	/
Campesterol	HMDB0002366	C5:1 carnitine	0.0301493	0.31	0.45	1.10 (1.02, 1.18)	0.01	0.02	102	-0.00349833
Campesterol	HMDB0006733	C22:6 CE	0.0307253	0.31	0.45	0.66 (0.60, 0.72)	<0.001	<0.001	0	/
Campesterol	HMDB0000168	L-Asparagine	0.0321608	0.27	0.42	0.83 (0.76, 0.90)	<0.001	<0.001	1000	-0.194886
Campesterol	HMDB0005385	C54:5 TAG	0.0339713	0.28	0.42	1.09 (1.03, 1.16)	0.003	0.007	0	/
Campesterol	HMDB0000630	Cytosine	0.0362369	0.25	0.39	1.01 (0.94, 1.08)	0.87	0.9	0	/
Campesterol	HMDB0000248	Thyroxine	0.0366642	0.22	0.35	0.92 (0.85, 0.99)	0.03	0.04	887	-0.0317891
Campesterol	HMDB0013325	C10:2 carnitine	0.0369922	0.21	0.35	1.08 (0.99, 1.17)	0.08	0.11	707	0.0341013
Campesterol	HMDB0001008	Biliverdin	0.0373157	0.23	0.36	0.96 (0.89, 1.03)	0.23	0.3	558	-0.00755182
Campesterol	HMDB0007219	C36:3 DAG	0.0373209	0.22	0.36	1.22 (1.15, 1.28)	<0.001	<0.001	0	/
Campesterol	HMDB0011208	C34:1 PC plasmalogen	0.0391409	0.2	0.35	0.72 (0.66, 0.78)	<0.001	<0.001	0	/
Campesterol	HMDB0002014	C14:1 carnitine	0.0392537	0.2	0.34	0.95 (0.88, 1.03)	0.2	0.26	1	-0.0129075
Campesterol	HMDB0000123	Glycine	0.0415427	0.13	0.25	0.74 (0.68, 0.81)	<0.001	<0.001	1000	-0.0370618
Campesterol	HMDB0059824	4-Hydroxy-3-methylacetophenone	0.0422908	0.14	0.25	1.04 (0.96, 1.13)	0.33	0.4	0	/
Campesterol	HMDB0000259	Serotonin	0.0444075	0.11	0.21	0.95 (0.88, 1.03)	0.2	0.26	0	/
Campesterol	HMDB0004827	Proline betaine	0.0460297	0.13	0.24	0.94 (0.87, 1.01)	0.07	0.1	0	/
Campesterol	HMDB0001565	Phosphocholine	0.0468118	0.08	0.16	0.94 (0.86, 1.02)	0.14	0.19	842	-0.0147396
Campesterol	HMDB0004193	N1-Methyl-2-pyridone-5-carboxamide	0.0482678	0.1	0.2	1.04 (0.96, 1.12)	0.34	0.42	1	0.0112163
Campesterol	HMDB0005447	C54:7 TAG	0.0484844	0.11	0.21	1.06 (0.98, 1.14)	0.15	0.2	0	/
Campesterol	HMDB0013678	4-Hydroxyhippuric acid	0.0485428	0.1	0.19	0.90 (0.83, 0.97)	0.009	0.02	933	-0.0262096
Campesterol	HMDB0000177	L-Histidine	0.0487824	0.1	0.19	1.01 (0.94, 1.09)	0.75	0.81	696	-0.0238516
Campesterol	HMDB0008942	C38:2 PE	0.0499739	0.1	0.19	0.80 (0.74, 0.87)	<0.001	<0.001	0	/
Campesterol	HMDB0005398	C56:4 TAG	0.050735	0.1	0.19	1.02 (0.95, 1.10)	0.56	0.63	0	/
Campesterol	HMDB0005380	C52:5 TAG	0.0515873	0.08	0.16	1.08 (1.00, 1.17)	0.06	0.08	0	/
Campesterol	HMDB0005463	C58:9 TAG	0.0520977	0.08	0.17	0.85 (0.79, 0.92)	<0.001	<0.001	0	/
Campesterol	HMDB0000210	Pantothenic acid	0.0521943	0.06	0.14	1.04 (0.96, 1.12)	0.38	0.46	0	/
Campesterol	HMDB0007973	C34:2 PC	0.0531311	0.07	0.15	1.11 (1.03, 1.20)	0.006	0.01	0	/
Campesterol	HMDB0000699	1-Methylnicotinamide	0.0538414	0.08	0.17	0.99 (0.92, 1.07)	0.84	0.88	114	-0.00150964
Campesterol	HMDB0013713	N-acetyltryptophan	0.0550225	0.07	0.15	1.01 (0.94, 1.09)	0.78	0.83	0	/
Campesterol	HMDB0005392	C56:8 TAG	0.0550529	0.07	0.15	0.96 (0.89, 1.03)	0.26	0.33	135	0.0121248
Campesterol	HMDB0042466	C55:3 TAG	0.0553257	0.07	0.16	0.91 (0.85, 0.98)	0.02	0.03	0	/
Campesterol	HMDB0000187	L-Serine	0.0555887	0.05	0.12	0.84 (0.77, 0.92)	<0.001	<0.001	4	0.010353
Campesterol	HMDB0009060	C36:3 PE	0.0587114	0.05	0.13	1.16 (1.09, 1.24)	<0.001	<0.001	5	0.0106934
Campesterol	HMDB0006347	C26 carnitine	0.0589174	0.06	0.14	1.11 (1.03, 1.19)	0.008	0.01	269	0.00838735
Campesterol	HMDB0013127	C4-OH carnitine	0.0609077	0.05	0.12	1.20 (1.11, 1.30)	<0.001	<0.001	1000	0.116759
Campesterol	HMDB0001906	2-Aminoisobutyric acid	0.0633323	0.05	0.12	0.93 (0.87, 1.00)	0.04	0.07	469	-0.00520656
Campesterol	HMDB0000610	C18:2 CE	0.0678978	0.02	0.07	0.67 (0.63, 0.72)	<0.001	<0.001	0	/
Campesterol	HMDB0005363	C52:4 TAG	0.0723942	0.02	0.05	1.19 (1.09, 1.29)	<0.001	<0.001	0	/
Campesterol	HMDB0013331	C14:2 carnitine	0.0760271	0.01	0.04	0.95 (0.88, 1.02)	0.16	0.22	0	/
Campesterol	HMDB0000462	Allantoin	0.0777182	0.008	0.03	1.03 (0.96, 1.11)	0.46	0.53	0	/
Campesterol	HMDB0005391	C54:6 TAG	0.0847957	0.006	0.02	0.99 (0.92, 1.07)	0.81	0.84	0	/
Campesterol	HMDB0005370	C54:4 TAG	0.0854448	0.005	0.02	0.95 (0.89, 1.03)	0.21	0.27	0	/
Campesterol	HMDB0007983	C36:4 PC-A	0.08636	0.006	0.02	0.90 (0.84, 0.97)	0.003	0.007	1000	-0.0705718
Campesterol	HMDB0000929	L-Tryptophan	0.0880673	0.005	0.02	1.10 (1.03, 1.18)	0.003	0.006	0	/
Campesterol	HMDB0011520	C22:0 LPE	0.0943899	0.001	0.008	0.70 (0.64, 0.77)	<0.001	<0.001	1000	-0.066154
Campesterol	HMDB0000159	L-Phenylalanine	0.0984393	0.002	0.01	1.19 (1.12, 1.26)	<0.001	<0.001	499	0.012215
Campesterol	HMDB0000235	Thiamine	0.0988798	<0.001	0.003	0.89 (0.82, 0.97)	0.01	0.02	0	/
Campesterol	HMDB0000092	Dimethylglycine	0.0997253	<0.001	0.007	1.00 (0.93, 1.07)	0.92	0.94	1	-0.00509167
Campesterol	HMDB0007248	C36:4 DAG	0.103848	<0.001	0.005	1.21 (1.12, 1.31)	<0.001	<0.001	0	/
Campesterol	HMDB0000716	L-Pipecolic acid	0.132209	<0.001	<0.001	1.12 (1.04, 1.20)	0.004	0.007	1	0.00319799
Campesterol	HMDB0000875	Trigonelline	0.13659	<0.001	<0.001	0.82 (0.76, 0.89)	<0.001	<0.001	1000	-0.0417408
Campesterol	HMDB0000714	Hippuric acid	0.138655	<0.001	<0.001	0.83 (0.77, 0.89)	<0.001	<0.001	998	-0.0186543
Campesterol	HMDB0003357	N-Acetylornithine	0.153107	<0.001	<0.001	0.95 (0.88, 1.02)	0.14	0.19	13	-0.00055039
Campesterol	HMDB0000043	Betaine	0.162509	<0.001	<0.001	0.78 (0.72, 0.85)	<0.001	<0.001	935	-0.0453106
Stigmasterol	HMDB0000658	C16:1 CE	-0.161675	<0.001	<0.001	1.01 (0.94, 1.09)	0.8	0.84	0	/
Stigmasterol	HMDB0007873	C32:1 PC	-0.120778	<0.001	<0.001	1.31 (1.21, 1.41)	<0.001	<0.001	0	/
Stigmasterol	HMDB0006344	Phenylacetylglutamine	-0.112871	<0.001	0.002	0.88 (0.82, 0.94)	<0.001	<0.001	978	-0.0281718
Stigmasterol	HMDB0007870	C30:1 PC	-0.0981806	<0.001	0.007	1.25 (1.16, 1.36)	<0.001	<0.001	0	/
Stigmasterol	HMDB0011387	C38:6 PE plasmalogen	-0.0953654	<0.001	0.01	1.07 (1.00, 1.15)	0.05	0.07	0	/
Stigmasterol	HMDB0008937	C36:4 PE	-0.0868295	0.001	0.02	1.21 (1.13, 1.29)	<0.001	<0.001	0	/
Stigmasterol	HMDB0007869	C30:0 PC	-0.0825141	0.003	0.03	1.17 (1.09, 1.24)	<0.001	<0.001	0	/
Stigmasterol	HMDB0011410	C36:5 PE plasmalogen	-0.0810463	0.005	0.05	1.13 (1.06, 1.21)	<0.001	<0.001	1000	0.106275
Stigmasterol	HMDB0002366	C5:1 carnitine	-0.0805641	0.004	0.04	1.10 (1.02, 1.18)	0.01	0.02	102	-0.00349833
Stigmasterol	HMDB0000235	Thiamine	-0.0792719	0.002	0.02	0.89 (0.82, 0.97)	0.01	0.02	0	/
Stigmasterol	HMDB0011512	C20:1 LPE	-0.0731501	0.007	0.06	0.83 (0.76, 0.90)	<0.001	<0.001	0	/
Stigmasterol	HMDB0009069	C38:5 PE	-0.072093	0.009	0.07	1.12 (1.05, 1.19)	<0.001	0.002	0	/
Stigmasterol	HMDB0008952	C34:2 PE plasmalogen	-0.0710884	0.01	0.07	1.02 (0.95, 1.10)	0.57	0.63	0	/
Stigmasterol	HMDB0004827	Proline betaine	-0.0706633	0.01	0.07	0.94 (0.87, 1.01)	0.07	0.1	0	/
Stigmasterol	HMDB0005376	C48:2 TAG	-0.0694588	0.01	0.07	1.56 (1.43, 1.71)	<0.001	<0.001	0	/
Stigmasterol	HMDB0011386	C38:5 PE plasmalogen	-0.0687112	0.02	0.08	1.09 (1.01, 1.17)	0.02	0.03	700	0.0196335
Stigmasterol	HMDB0008138	C36:4 PC-B	-0.0680165	0.01	0.07	1.13 (1.05, 1.22)	0.001	0.002	0	/
Stigmasterol	HMDB0005362	C51:2 TAG	-0.0667627	0.01	0.07	1.40 (1.28, 1.52)	<0.001	<0.001	0	/
Stigmasterol	HMDB0007883	C34:4 PC	-0.066754	0.01	0.07	1.25 (1.16, 1.36)	<0.001	<0.001	0	/
Stigmasterol	HMDB0007972	C34:1 PC	-0.0666623	0.01	0.07	1.14 (1.06, 1.23)	<0.001	0.001	18	-0.00581946
Stigmasterol	HMDB0010383	C16:1 LPC	-0.0665597	0.02	0.08	1.02 (0.95, 1.10)	0.61	0.67	14	0.012788
Stigmasterol	HMDB0002802	Cortisone	-0.0653691	0.02	0.09	1.04 (0.96, 1.13)	0.29	0.37	0	/
Stigmasterol	HMDB0005377	C50:2 TAG	-0.0650404	0.02	0.08	1.68 (1.54, 1.83)	<0.001	<0.001	0	/
Stigmasterol	HMDB0011705	C49:1 TAG	-0.0650258	0.03	0.11	1.42 (1.31, 1.54)	<0.001	<0.001	0	/
Stigmasterol	HMDB0000064	Creatine	-0.0629462	0.02	0.1	1.04 (0.97, 1.12)	0.29	0.36	14	-0.00580657
Stigmasterol	HMDB0000062	L-Carnitine	-0.0625737	0.03	0.12	1.09 (1.01, 1.17)	0.03	0.05	0	/
Stigmasterol	HMDB0011214	C34:5 PC plasmalogen	-0.0607544	0.04	0.13	1.07 (1.00, 1.15)	0.04	0.07	680	0.00916731
Stigmasterol	HMDB0010411	C46:0 TAG	-0.0605871	0.03	0.12	1.56 (1.43, 1.69)	<0.001	<0.001	0	/
Stigmasterol	HMDB0000688	C5 carnitine	-0.0605346	0.04	0.13	1.26 (1.18, 1.35)	<0.001	<0.001	1000	0.061755
Stigmasterol	HMDB0006736	C20:3 CE	-0.0579701	0.05	0.15	0.83 (0.77, 0.89)	<0.001	<0.001	7	0.00507073
Stigmasterol	HMDB0000824	Propionylcarnitine	-0.0578809	0.05	0.15	1.10 (1.03, 1.18)	0.003	0.006	421	-0.0122942
Stigmasterol	HMDB0005356	C48:0 TAG	-0.0572148	0.04	0.13	1.68 (1.54, 1.83)	<0.001	<0.001	889	0.0334043
Stigmasterol	HMDB0004193	N1-Methyl-2-pyridone-5-carboxamide	-0.057095	0.04	0.14	1.04 (0.96, 1.12)	0.34	0.42	1	0.0112163
Stigmasterol	HMDB0011220	C36:5 PC plasmalogen-B	-0.0563572	0.05	0.15	0.93 (0.86, 1.00)	0.06	0.09	0	/
Stigmasterol	HMDB0006725	C14:0 CE	-0.0544903	0.04	0.15	0.91 (0.84, 0.99)	0.02	0.03	887	-0.0322855
Stigmasterol	HMDB0010412	C46:1 TAG	-0.0532857	0.06	0.17	1.52 (1.39, 1.65)	<0.001	<0.001	0	/
Stigmasterol	HMDB0042076	C47:2 TAG	-0.0528362	0.06	0.17	1.41 (1.30, 1.53)	<0.001	<0.001	0	/
Stigmasterol	HMDB0007199	C38:5 DAG	-0.0527358	0.06	0.18	1.38 (1.28, 1.48)	<0.001	<0.001	0	/
Stigmasterol	HMDB0042093	C45:0 TAG	-0.0525745	0.07	0.19	1.30 (1.21, 1.40)	<0.001	<0.001	2	0.00622676
Stigmasterol	HMDB0005359	C48:1 TAG	-0.0524319	0.06	0.17	1.65 (1.52, 1.80)	<0.001	<0.001	0	/
Stigmasterol	HMDB0000479	3-Methylhistidine	-0.0523781	0.05	0.15	0.98 (0.91, 1.07)	0.67	0.73	2	-0.00496824
Stigmasterol	HMDB0008923	C32:0 PE	-0.0522807	0.06	0.18	1.12 (1.04, 1.21)	0.004	0.008	0	/
Stigmasterol	HMDB0011706	C49:2 TAG	-0.0514293	0.07	0.18	1.35 (1.24, 1.46)	<0.001	<0.001	0	/
Stigmasterol	HMDB0000210	Pantothenic acid	-0.0504937	0.05	0.16	1.04 (0.96, 1.12)	0.38	0.46	0	/
Stigmasterol	HMDB0005433	C50:3 TAG	-0.0494245	0.07	0.2	1.48 (1.37, 1.60)	<0.001	<0.001	0	/
Stigmasterol	HMDB0005458	C58:6 TAG	-0.0493049	0.08	0.2	1.07 (0.99, 1.15)	0.11	0.15	0	/
Stigmasterol	HMDB0031106	C51:0 TAG	-0.0491644	0.08	0.21	1.54 (1.42, 1.67)	<0.001	<0.001	21	0.00462189
Stigmasterol	HMDB0042104	C51:1 TAG	-0.0464266	0.09	0.23	1.64 (1.51, 1.79)	<0.001	<0.001	1000	0.0398514
Stigmasterol	HMDB0000925	Trimethylamine N-oxide	-0.0463331	0.12	0.27	1.02 (0.95, 1.10)	0.53	0.6	171	0.00975267
Stigmasterol	HMDB0005360	C50:1 TAG	-0.0454417	0.09	0.23	1.84 (1.69, 2.01)	<0.001	<0.001	1000	0.0319092
Stigmasterol	HMDB0042100	C47:1 TAG	-0.0452761	0.12	0.27	1.41 (1.29, 1.53)	<0.001	<0.001	0	/
Stigmasterol	HMDB0001859	Acetaminophen	-0.0451322	0.12	0.27	1.03 (0.96, 1.10)	0.37	0.44	407	0.007133
Stigmasterol	HMDB0008928	C34:2 PE	-0.0441867	0.12	0.27	1.25 (1.17, 1.33)	<0.001	<0.001	1	0.00157532
Stigmasterol	HMDB0010419	C46:2 TAG	-0.0437227	0.12	0.27	1.47 (1.35, 1.60)	<0.001	<0.001	0	/
Stigmasterol	HMDB0010375	C22:5 CE	-0.0434195	0.14	0.3	0.76 (0.73, 0.80)	<0.001	<0.001	990	-0.00759042
Stigmasterol	HMDB0000063	Cortisol	-0.0433662	0.12	0.27	0.98 (0.90, 1.05)	0.53	0.59	14	-0.00162971
Stigmasterol	HMDB0008991	C36:0 PE	-0.0428442	0.12	0.27	0.97 (0.90, 1.05)	0.45	0.52	0	/
Stigmasterol	HMDB0005456	C56:6 TAG	-0.0428183	0.14	0.3	1.00 (0.93, 1.07)	0.96	0.97	0	/
Stigmasterol	HMDB0005432	C48:3 TAG	-0.0424408	0.13	0.28	1.34 (1.25, 1.43)	<0.001	<0.001	1	-0.0144964
Stigmasterol	HMDB0042099	C45:1 TAG	-0.0424144	0.13	0.29	1.40 (1.29, 1.51)	<0.001	<0.001	0	/
Stigmasterol	HMDB0007099	C32:1 DAG	-0.0407266	0.14	0.3	1.75 (1.61, 1.91)	<0.001	<0.001	0	/
Stigmasterol	HMDB0042103	C49:3 TAG	-0.0394336	0.16	0.33	1.22 (1.14, 1.31)	<0.001	<0.001	14	-0.00797038
Stigmasterol	HMDB0010403	C22:5 LPC	-0.0382589	0.17	0.34	0.89 (0.82, 0.97)	0.005	0.01	800	-0.0128627
Stigmasterol	HMDB0008048	C38:4 PC	-0.0378647	0.17	0.34	1.13 (1.06, 1.22)	<0.001	0.001	0	/
Stigmasterol	HMDB0008925	C34:0 PE	-0.0376932	0.18	0.35	1.07 (1.00, 1.15)	0.04	0.07	1	0.0189619
Stigmasterol	HMDB0000699	1-Methylnicotinamide	-0.037265	0.2	0.37	0.99 (0.92, 1.07)	0.84	0.88	114	-0.00150964
Stigmasterol	HMDB0043170	C45:2 TAG	-0.0371031	0.19	0.35	1.49 (1.37, 1.62)	<0.001	<0.001	0	/
Stigmasterol	HMDB0011384	C38:3 PE plasmalogen	-0.0370153	0.17	0.34	0.77 (0.72, 0.83)	<0.001	<0.001	0	/
Stigmasterol	HMDB0042063	C44:0 TAG	-0.0367756	0.19	0.36	1.46 (1.35, 1.58)	<0.001	<0.001	0	/
Stigmasterol	HMDB0009003	C38:4 PE	-0.0364834	0.18	0.35	1.27 (1.20, 1.35)	<0.001	<0.001	0	/
Stigmasterol	HMDB0011442	C36:4 PE plasmalogen	-0.0359913	0.22	0.39	0.95 (0.88, 1.02)	0.19	0.25	0	/
Stigmasterol	HMDB0004030	21-Deoxycortisol	-0.0355063	0.19	0.36	0.91 (0.84, 0.98)	0.01	0.02	993	-0.0322908
Stigmasterol	HMDB0005357	C50:0 TAG	-0.0349514	0.2	0.37	1.69 (1.56, 1.84)	<0.001	<0.001	473	0.000857686
Stigmasterol	HMDB0009082	C36:2 PE plasmalogen	-0.0321165	0.26	0.46	1.02 (0.95, 1.10)	0.52	0.59	0	/
Stigmasterol	HMDB0042062	C43:0 TAG	-0.030353	0.28	0.48	1.31 (1.22, 1.41)	<0.001	<0.001	0	/
Stigmasterol	HMDB0008038	C36:1 PC	-0.0298475	0.3	0.49	1.09 (1.02, 1.17)	0.008	0.01	0	/
Stigmasterol	HMDB0007871	C32:0 PC	-0.0292914	0.28	0.48	1.08 (1.00, 1.16)	0.06	0.09	0	/
Stigmasterol	HMDB0000715	Kynurenic acid	-0.0292523	0.28	0.47	1.07 (0.99, 1.15)	0.11	0.16	0	/
Stigmasterol	HMDB0000301	Urocanic acid	-0.0291029	0.32	0.51	1.06 (0.99, 1.13)	0.1	0.14	683	0.0100393
Stigmasterol	HMDB0000885	C16:0 CE	-0.028864	0.31	0.5	0.70 (0.66, 0.75)	<0.001	<0.001	0	/
Stigmasterol	HMDB0000158	L-Tyrosine	-0.0283542	0.32	0.51	1.31 (1.23, 1.40)	<0.001	<0.001	1000	0.0916082
Stigmasterol	HMDB0010379	C14:0 LPC	-0.0278667	0.31	0.51	1.18 (1.10, 1.26)	<0.001	<0.001	0	/
Stigmasterol	HMDB0011229	C38:7 PC plasmalogen	-0.0276889	0.32	0.51	0.87 (0.81, 0.94)	<0.001	0.001	0	/
Stigmasterol	HMDB0005471	C58:7 TAG	-0.0259204	0.37	0.55	0.92 (0.86, 0.99)	0.02	0.04	927	-0.0248557
Stigmasterol	HMDB0007011	C30:0 DAG	-0.0259083	0.37	0.55	1.60 (1.49, 1.73)	<0.001	<0.001	890	0.00562473
Stigmasterol	HMDB0000904	Citrulline	-0.0246389	0.39	0.56	0.93 (0.86, 1.00)	0.06	0.09	4	0.00930729
Stigmasterol	HMDB0000182	L-Lysine	-0.0244634	0.37	0.55	1.20 (1.12, 1.29)	<0.001	<0.001	0	/
Stigmasterol	HMDB0008047	C38:3 PC	-0.0243898	0.36	0.55	1.30 (1.22, 1.39)	<0.001	<0.001	1000	0.0846193
Stigmasterol	HMDB0011221	C36:5 PC plasmalogen-A	-0.0240222	0.38	0.55	0.95 (0.87, 1.03)	0.19	0.25	0	/
Stigmasterol	HMDB0000259	Serotonin	-0.023768	0.36	0.55	0.95 (0.88, 1.03)	0.2	0.26	0	/
Stigmasterol	HMDB0000462	Allantoin	-0.023652	0.39	0.56	1.03 (0.96, 1.11)	0.46	0.53	0	/
Stigmasterol	HMDB0007874	C32:2 PC	-0.0230224	0.4	0.57	1.20 (1.12, 1.28)	<0.001	<0.001	0	/
Stigmasterol	HMDB0000918	C18:1 CE	-0.0224273	0.41	0.58	0.68 (0.63, 0.73)	<0.001	<0.001	0	/
Stigmasterol	HMDB0042098	C43:1 TAG	-0.0214769	0.46	0.63	1.43 (1.32, 1.55)	<0.001	<0.001	0	/
Stigmasterol	HMDB0010370	C18:3 CE	-0.0207915	0.47	0.63	0.81 (0.75, 0.87)	<0.001	<0.001	0	/
Stigmasterol	HMDB0002013	C4 carnitine	-0.0199285	0.5	0.65	1.08 (1.01, 1.16)	0.03	0.05	0	/
Stigmasterol	HMDB0000206	N6-Acetyl-L-lysine	-0.0192505	0.5	0.65	0.95 (0.88, 1.03)	0.22	0.28	993	-0.0332684
Stigmasterol	HMDB0000026	Ureidopropionic acid	-0.0183959	0.53	0.67	1.12 (1.04, 1.20)	0.002	0.003	1	0.00413514
Stigmasterol	HMDB0000884	Ribothymidine	-0.0181297	0.53	0.68	0.92 (0.86, 0.99)	0.03	0.05	1	-0.00767878
Stigmasterol	HMDB0010497	C50:6 TAG	-0.0177826	0.53	0.67	1.33 (1.23, 1.44)	<0.001	<0.001	0	/
Stigmasterol	HMDB0009102	C38:6 PE	-0.0171753	0.51	0.66	1.17 (1.08, 1.27)	<0.001	<0.001	0	/
Stigmasterol	HMDB0004620	N-a-Acetyl-L-arginine	-0.0161908	0.55	0.69	1.02 (0.95, 1.10)	0.6	0.66	1	0.00106136
Stigmasterol	HMDB0006726	C20:4 CE	-0.0160205	0.58	0.71	0.75 (0.70, 0.80)	<0.001	<0.001	0	/
Stigmasterol	HMDB0007103	C34:2 DAG	-0.0159238	0.57	0.7	1.61 (1.49, 1.74)	<0.001	<0.001	0	/
Stigmasterol	HMDB0010471	C50:5 TAG	-0.015897	0.57	0.7	1.35 (1.24, 1.46)	<0.001	<0.001	0	/
Stigmasterol	HMDB0005435	C50:4 TAG	-0.0157637	0.56	0.7	1.36 (1.25, 1.49)	<0.001	<0.001	0	/
Stigmasterol	HMDB0007100	C34:0 DAG	-0.013536	0.62	0.75	1.52 (1.43, 1.63)	<0.001	<0.001	0	/
Stigmasterol	HMDB0008006	C34:3 PC	-0.0128166	0.63	0.76	1.11 (1.03, 1.19)	0.009	0.02	0	/
Stigmasterol	HMDB0007098	C32:0 DAG	-0.012684	0.65	0.77	1.66 (1.55, 1.79)	<0.001	<0.001	894	0.0149688
Stigmasterol	HMDB0010395	C20:4 LPC	-0.0108438	0.7	0.8	0.90 (0.83, 0.96)	0.003	0.007	0	/
Stigmasterol	HMDB0000929	L-Tryptophan	-0.0100162	0.74	0.84	1.10 (1.03, 1.18)	0.003	0.006	0	/
Stigmasterol	HMDB0007102	C34:1 DAG	-0.0085283	0.76	0.86	1.70 (1.58, 1.84)	<0.001	<0.001	1000	0.16587
Stigmasterol	HMDB0011343	C34:3 PE plasmalogen	-0.00827517	0.78	0.88	0.98 (0.92, 1.06)	0.65	0.71	0	/
Stigmasterol	HMDB0000128	Guanidoacetic acid	-0.00736588	0.79	0.89	0.93 (0.86, 1.00)	0.05	0.08	150	0.012483
Stigmasterol	HMDB0005369	C52:2 TAG	-0.00676946	0.8	0.89	1.58 (1.46, 1.70)	<0.001	<0.001	0	/
Stigmasterol	HMDB0007132	C34:3 DAG	-0.00649311	0.82	0.89	1.59 (1.45, 1.73)	<0.001	<0.001	0	/
Stigmasterol	HMDB0011103	1,7-Dimethyluric acid	-0.0053534	0.85	0.91	1.02 (0.94, 1.10)	0.62	0.69	0	/
Stigmasterol	HMDB0012356	C34:0 PS	-0.00500334	0.86	0.92	1.07 (0.99, 1.15)	0.08	0.12	0	/
Stigmasterol	HMDB0008511	C40:10 PC	-0.00478928	0.86	0.92	0.87 (0.81, 0.94)	<0.001	0.001	9	-0.00530957
Stigmasterol	HMDB0003681	4-Acetamidobutanoic acid	-0.00413411	0.88	0.93	0.95 (0.88, 1.02)	0.15	0.21	0	/
Stigmasterol	HMDB0005406	C56:5 TAG	-0.00276469	0.92	0.96	1.01 (0.94, 1.08)	0.79	0.83	0	/
Stigmasterol	HMDB0042226	C55:2 TAG	-0.00140456	0.96	0.98	1.42 (1.32, 1.53)	<0.001	<0.001	0	/
Stigmasterol	HMDB0011420	C38:7 PE plasmalogen	-0.00112634	0.97	0.98	1.05 (0.97, 1.14)	0.21	0.27	0	/
Stigmasterol	HMDB0042196	C53:2 TAG	-0.000890715	0.97	0.98	1.22 (1.14, 1.31)	<0.001	<0.001	0	/
Stigmasterol	HMDB0009016	C36:1 PE plasmalogen	9.05906e-05	1	1	0.69 (0.64, 0.76)	<0.001	<0.001	0	/
Stigmasterol	HMDB0008994	C36:2 PE	0.000525085	0.99	0.99	1.28 (1.21, 1.36)	<0.001	<0.001	0	/
Stigmasterol	HMDB0009060	C36:3 PE	0.000549484	0.98	0.99	1.16 (1.09, 1.24)	<0.001	<0.001	5	0.0106934
Stigmasterol	HMDB0004949	C16:0 Ceramide	0.00187938	0.95	0.97	1.11 (1.04, 1.19)	0.003	0.005	225	0.0030579
Stigmasterol	HMDB0008270	C38:2 PC	0.00232737	0.93	0.96	1.04 (0.97, 1.12)	0.24	0.3	0	/
Stigmasterol	HMDB0008993	C36:1 PE	0.00242658	0.93	0.96	1.40 (1.30, 1.52)	<0.001	<0.001	0	/
Stigmasterol	HMDB0005367	C52:1 TAG	0.00279657	0.92	0.95	1.58 (1.48, 1.69)	<0.001	<0.001	1000	0.0687752
Stigmasterol	HMDB0001563	1-Methylguanosine	0.00326876	0.91	0.95	1.22 (1.14, 1.31)	<0.001	<0.001	1000	0.0938988
Stigmasterol	HMDB0005365	C52:0 TAG	0.00348628	0.9	0.94	1.57 (1.45, 1.69)	<0.001	<0.001	0	/
Stigmasterol	HMDB0013238	C7 carnitine	0.00406387	0.89	0.93	1.04 (0.96, 1.12)	0.32	0.39	0	/
Stigmasterol	HMDB0000562	Creatinine	0.00410533	0.89	0.93	0.87 (0.81, 0.94)	<0.001	<0.001	1000	-0.0791286
Stigmasterol	HMDB0001325	N6,N6,N6-Trimethyl-L-lysine	0.00426883	0.88	0.93	1.03 (0.96, 1.11)	0.41	0.49	0	/
Stigmasterol	HMDB0001046	Cotinine	0.00439787	0.81	0.89	1.02 (0.91, 1.14)	0.76	0.81	2	0.00256929
Stigmasterol	HMDB0010517	C52:7 TAG	0.00573453	0.84	0.9	1.19 (1.11, 1.27)	<0.001	<0.001	0	/
Stigmasterol	HMDB0005385	C54:5 TAG	0.00618728	0.83	0.9	1.09 (1.03, 1.16)	0.003	0.007	0	/
Stigmasterol	HMDB0005384	C52:3 TAG	0.00645867	0.82	0.89	1.37 (1.27, 1.49)	<0.001	<0.001	0	/
Stigmasterol	HMDB0011517	C20:4 LPE	0.0066082	0.82	0.89	0.92 (0.85, 0.99)	0.02	0.03	272	-0.00622381
Stigmasterol	HMDB0011701	C51:3 TAG	0.0067897	0.8	0.89	1.23 (1.13, 1.34)	<0.001	<0.001	0	/
Stigmasterol	HMDB0000767	Pseudouridine	0.00708752	0.8	0.89	0.97 (0.90, 1.04)	0.41	0.49	686	-0.0452872
Stigmasterol	HMDB0000162	L-Proline	0.0076149	0.79	0.88	1.19 (1.11, 1.28)	<0.001	<0.001	255	0.00589416
Stigmasterol	HMDB0000289	Uric acid	0.008039	0.77	0.87	1.29 (1.21, 1.38)	<0.001	<0.001	1000	0.0538055
Stigmasterol	HMDB0012097	C14:0 SM	0.00874118	0.74	0.84	0.95 (0.88, 1.03)	0.19	0.25	5	-0.011929
Stigmasterol	HMDB0005413	C58:8 TAG	0.0107988	0.69	0.8	0.95 (0.87, 1.02)	0.17	0.22	0	/
Stigmasterol	HMDB0011503	C16:0 LPE	0.0111431	0.68	0.8	0.95 (0.87, 1.02)	0.16	0.21	1000	-0.0938891
Stigmasterol	HMDB0000725	4-Hydroxyproline	0.0113918	0.7	0.8	1.02 (0.95, 1.10)	0.52	0.59	0	/
Stigmasterol	HMDB0004953	C24:1 Ceramide	0.0115559	0.68	0.8	1.06 (0.99, 1.14)	0.08	0.12	4	-0.00559745
Stigmasterol	HMDB0008057	C40:6 PC	0.0115956	0.67	0.8	1.00 (0.92, 1.08)	0.96	0.97	0	/
Stigmasterol	HMDB0042466	C55:3 TAG	0.0118053	0.68	0.8	0.91 (0.85, 0.98)	0.02	0.03	0	/
Stigmasterol	HMDB0011441	C36:3 PE plasmalogen	0.0120642	0.68	0.8	0.95 (0.88, 1.02)	0.16	0.21	0	/
Stigmasterol	HMDB0005398	C56:4 TAG	0.0131677	0.64	0.77	1.02 (0.95, 1.10)	0.56	0.63	0	/
Stigmasterol	HMDB0000112	GABA	0.0137203	0.61	0.74	1.12 (1.05, 1.20)	0.001	0.003	0	/
Stigmasterol	HMDB0010368	C18:0 CE	0.0142243	0.61	0.74	0.83 (0.77, 0.89)	<0.001	<0.001	420	0.0117376
Stigmasterol	HMDB0043058	C53:3 TAG	0.0148631	0.6	0.73	1.01 (0.94, 1.09)	0.78	0.83	11	-0.00239647
Stigmasterol	HMDB0005436	C52:6 TAG	0.0151403	0.59	0.72	1.21 (1.12, 1.31)	<0.001	<0.001	0	/
Stigmasterol	HMDB0007218	C36:2 DAG	0.0167642	0.55	0.69	1.48 (1.38, 1.60)	<0.001	<0.001	0	/
Stigmasterol	HMDB0008105	C36:3 PC	0.0169067	0.54	0.68	1.07 (0.99, 1.16)	0.07	0.1	0	/
Stigmasterol	HMDB0000898	1-Methylhistamine	0.0169885	0.54	0.68	1.07 (0.99, 1.15)	0.1	0.14	182	0.007491
Stigmasterol	HMDB0010498	C54:9 TAG	0.0191184	0.51	0.66	1.11 (1.02, 1.20)	0.01	0.02	0	/
Stigmasterol	HMDB0011210	C34:2 PC plasmalogen	0.0192184	0.49	0.65	0.69 (0.65, 0.73)	<0.001	<0.001	1000	-0.121139
Stigmasterol	HMDB0005396	C56:1 TAG	0.0193595	0.49	0.65	1.39 (1.29, 1.49)	<0.001	<0.001	0	/
Stigmasterol	HMDB0011211	C34:3 PC plasmalogen	0.0193621	0.5	0.65	0.70 (0.64, 0.76)	<0.001	<0.001	920	-0.0290035
Stigmasterol	HMDB0010531	C58:11 TAG	0.0193791	0.49	0.65	1.00 (0.93, 1.09)	0.91	0.93	0	/
Stigmasterol	HMDB0013130	C5-DC carnitine	0.0204381	0.48	0.65	0.91 (0.85, 0.98)	0.01	0.03	808	-0.0181962
Stigmasterol	HMDB0007216	C36:1 DAG	0.0204796	0.46	0.63	1.60 (1.48, 1.71)	<0.001	<0.001	12	0.00193567
Stigmasterol	HMDB0000630	Cytosine	0.0209962	0.48	0.64	1.01 (0.94, 1.08)	0.87	0.9	0	/
Stigmasterol	HMDB0004952	C22:0 Ceramide	0.0215413	0.44	0.61	1.28 (1.20, 1.37)	<0.001	<0.001	1000	0.0798117
Stigmasterol	HMDB0010513	C56:10 TAG	0.0218802	0.44	0.6	1.04 (0.96, 1.12)	0.37	0.44	0	/
Stigmasterol	HMDB0000705	Hexanoylcarnitine	0.0219303	0.42	0.58	1.13 (1.04, 1.23)	0.004	0.008	27	0.0135372
Stigmasterol	HMDB0000043	Betaine	0.0225901	0.4	0.56	0.78 (0.72, 0.85)	<0.001	<0.001	935	-0.0453106
Stigmasterol	HMDB0007991	C38:6 PC	0.0231828	0.38	0.56	0.92 (0.84, 1.00)	0.04	0.07	1000	-0.0687566
Stigmasterol	HMDB0008731	C40:9 PC	0.0233494	0.39	0.56	0.90 (0.82, 0.97)	0.01	0.02	1000	-0.0581437
Stigmasterol	HMDB0000696	L-Methionine	0.0240319	0.42	0.59	1.08 (1.01, 1.15)	0.03	0.05	269	-0.0136931
Stigmasterol	HMDB0000054	Bilirubin	0.0241879	0.4	0.56	0.97 (0.91, 1.05)	0.46	0.53	0	/
Stigmasterol	HMDB0001847	Caffeine	0.024308	0.38	0.55	1.06 (0.98, 1.15)	0.15	0.21	0	/
Stigmasterol	HMDB0011310	C36:4 PC plasmalogen	0.0247932	0.37	0.55	0.75 (0.69, 0.81)	<0.001	<0.001	0	/
Stigmasterol	HMDB0001906	2-Aminoisobutyric acid	0.0252804	0.39	0.56	0.93 (0.87, 1.00)	0.04	0.07	469	-0.00520656
Stigmasterol	HMDB0006731	C20:5 CE	0.0257501	0.37	0.55	0.81 (0.76, 0.87)	<0.001	<0.001	0	/
Stigmasterol	HMDB0011244	C36:3 PC plasmalogen-A	0.0262738	0.35	0.55	0.71 (0.67, 0.77)	<0.001	<0.001	1000	-0.047628
Stigmasterol	HMDB0005410	C56:3 TAG	0.0268495	0.34	0.54	1.27 (1.18, 1.37)	<0.001	<0.001	0	/
Stigmasterol	HMDB0001008	Biliverdin	0.0272116	0.34	0.54	0.96 (0.89, 1.03)	0.23	0.3	558	-0.00755182
Stigmasterol	HMDB0011252	C38:4 PC plasmalogen	0.0277657	0.33	0.52	0.92 (0.86, 1.00)	0.04	0.07	0	/
Stigmasterol	HMDB0011394	C40:7 PE plasmalogen	0.0277732	0.32	0.51	0.96 (0.88, 1.03)	0.27	0.34	0	/
Stigmasterol	HMDB0000167	L-Threonine	0.0278916	0.29	0.48	1.03 (0.95, 1.12)	0.43	0.5	13	0.00428015
Stigmasterol	HMDB0005478	C60:12 TAG	0.0286778	0.31	0.5	0.92 (0.85, 0.99)	0.03	0.05	0	/
Stigmasterol	HMDB0000883	L-Valine	0.0292611	0.31	0.5	1.37 (1.29, 1.45)	<0.001	<0.001	1000	0.102436
Stigmasterol	HMDB0005448	C56:9 TAG	0.0303787	0.28	0.47	1.01 (0.93, 1.09)	0.81	0.84	0	/
Stigmasterol	HMDB0000172	L-Isoleucine	0.0308989	0.29	0.48	1.26 (1.20, 1.33)	<0.001	<0.001	0	/
Stigmasterol	HMDB0005404	C56:2 TAG	0.0309084	0.27	0.47	1.35 (1.26, 1.45)	<0.001	<0.001	0	/
Stigmasterol	HMDB0005463	C58:9 TAG	0.0323776	0.25	0.43	0.85 (0.79, 0.92)	<0.001	<0.001	0	/
Stigmasterol	HMDB0013713	N-acetyltryptophan	0.0327576	0.24	0.43	1.01 (0.94, 1.09)	0.78	0.83	0	/
Stigmasterol	HMDB0000791	L-Octanoylcarnitine	0.034019	0.23	0.4	0.99 (0.92, 1.08)	0.89	0.92	1	-0.0301821
Stigmasterol	HMDB0005395	C54:1 TAG	0.0344779	0.21	0.39	1.50 (1.39, 1.62)	<0.001	<0.001	0	/
Stigmasterol	HMDB0013678	4-Hydroxyhippuric acid	0.0350791	0.2	0.37	0.90 (0.83, 0.97)	0.009	0.02	933	-0.0262096
Stigmasterol	HMDB0011506	C18:1 LPE	0.0356237	0.22	0.39	0.91 (0.84, 0.98)	0.02	0.03	1	-0.0186852
Stigmasterol	HMDB0001886	3-Methylxanthine	0.0357136	0.2	0.37	0.97 (0.90, 1.05)	0.45	0.52	1	-0.0043781
Stigmasterol	HMDB0000641	L-Glutamine	0.0357892	0.22	0.39	0.89 (0.83, 0.96)	0.003	0.006	936	-0.00422016
Stigmasterol	HMDB0000651	Decanoylcarnitine	0.036285	0.2	0.37	0.99 (0.91, 1.07)	0.76	0.81	0	/
Stigmasterol	HMDB0010397	C20:5 LPC	0.0376781	0.18	0.35	0.79 (0.72, 0.86)	<0.001	<0.001	0	/
Stigmasterol	HMDB0000714	Hippuric acid	0.0378974	0.17	0.34	0.83 (0.77, 0.89)	<0.001	<0.001	998	-0.0186543
Stigmasterol	HMDB0005923	N4-Acetylcytidine	0.0380491	0.17	0.34	1.15 (1.07, 1.24)	<0.001	<0.001	1000	0.0357271
Stigmasterol	HMDB0013326	C12:1 carnitine	0.0390112	0.18	0.35	0.95 (0.88, 1.03)	0.2	0.26	567	-0.0246442
Stigmasterol	HMDB0013287	Ne,Ne dimethyllysine	0.0400088	0.17	0.34	0.99 (0.92, 1.06)	0.7	0.75	0	/
Stigmasterol	HMDB0009012	C40:6 PE	0.0403094	0.16	0.33	1.32 (1.20, 1.45)	<0.001	<0.001	0	/
Stigmasterol	HMDB0000631	Deoxycholic acid glycine conjugate	0.0420879	0.11	0.27	1.15 (1.06, 1.25)	<0.001	0.001	273	0.00498851
Stigmasterol	HMDB0000201	L-Acetylcarnitine	0.0424252	0.15	0.31	1.02 (0.94, 1.09)	0.68	0.73	0	/
Stigmasterol	HMDB0005380	C52:5 TAG	0.0426081	0.12	0.27	1.08 (1.00, 1.17)	0.06	0.08	0	/
Stigmasterol	HMDB0002815	C18:1 LPC	0.0438586	0.11	0.26	0.77 (0.70, 0.84)	<0.001	<0.001	0	/
Stigmasterol	HMDB0005462	C56:7 TAG	0.04475	0.12	0.27	1.08 (1.00, 1.17)	0.04	0.06	0	/
Stigmasterol	HMDB0000687	L-Leucine	0.0448097	0.12	0.27	1.28 (1.21, 1.34)	<0.001	<0.001	0	/
Stigmasterol	HMDB0002250	C12 carnitine	0.044974	0.12	0.27	1.00 (0.92, 1.08)	0.97	0.97	55	-0.0117085
Stigmasterol	HMDB0012101	C18:1 SM	0.0470132	0.08	0.2	0.85 (0.79, 0.92)	<0.001	<0.001	976	0.0215911
Stigmasterol	HMDB0011507	C18:2 LPE	0.0471432	0.1	0.24	0.90 (0.84, 0.97)	0.006	0.01	1	-0.0133346
Stigmasterol	HMDB0000161	L-Alanine	0.0481855	0.09	0.23	1.45 (1.35, 1.57)	<0.001	<0.001	1000	0.254442
Stigmasterol	HMDB0000177	L-Histidine	0.0483198	0.08	0.21	1.01 (0.94, 1.09)	0.75	0.81	696	-0.0238516
Stigmasterol	HMDB0010386	C18:2 LPC	0.0484078	0.08	0.21	0.73 (0.66, 0.80)	<0.001	<0.001	1000	-0.112765
Stigmasterol	HMDB0001539	ADMA	0.0485815	0.07	0.19	1.03 (0.96, 1.12)	0.42	0.49	0	/
Stigmasterol	HMDB0001565	Phosphocholine	0.0487447	0.05	0.15	0.94 (0.86, 1.02)	0.14	0.19	842	-0.0147396
Stigmasterol	HMDB0010518	C54:8 TAG	0.0488419	0.08	0.22	1.11 (1.03, 1.20)	0.008	0.01	0	/
Stigmasterol	HMDB0011478	C18:3 LPE	0.0494939	0.08	0.21	0.98 (0.91, 1.06)	0.63	0.69	997	-0.0217195
Stigmasterol	HMDB0010407	C16:1 LPC plasmalogen	0.0527852	0.04	0.15	0.75 (0.69, 0.83)	<0.001	<0.001	0	/
Stigmasterol	HMDB0004824	N2,N2-Dimethylguanosine	0.0528791	0.06	0.17	1.11 (1.04, 1.19)	0.002	0.003	977	0.03856
Stigmasterol	HMDB0005392	C56:8 TAG	0.0558681	0.05	0.15	0.96 (0.89, 1.03)	0.26	0.33	135	0.0121248
Stigmasterol	HMDB0005403	C54:2 TAG	0.056198	0.04	0.15	1.34 (1.26, 1.42)	<0.001	<0.001	0	/
Stigmasterol	HMDB0013288	C9 carnitine	0.0564345	0.05	0.16	1.03 (0.95, 1.11)	0.5	0.58	0	/
Stigmasterol	HMDB0001991	7-Methylxanthine	0.056611	0.04	0.14	0.97 (0.90, 1.05)	0.44	0.51	0	/
Stigmasterol	HMDB0010382	C16:0 LPC	0.0566706	0.04	0.14	0.98 (0.91, 1.05)	0.53	0.59	0	/
Stigmasterol	HMDB0000168	L-Asparagine	0.0588847	0.03	0.12	0.83 (0.76, 0.90)	<0.001	<0.001	1000	-0.194886
Stigmasterol	HMDB0000610	C18:2 CE	0.0595115	0.03	0.12	0.67 (0.63, 0.72)	<0.001	<0.001	0	/
Stigmasterol	HMDB0010404	C22:6 LPC	0.0595862	0.03	0.12	0.84 (0.78, 0.90)	<0.001	<0.001	1	-0.00119847
Stigmasterol	HMDB0006733	C22:6 CE	0.0596283	0.03	0.13	0.66 (0.60, 0.72)	<0.001	<0.001	0	/
Stigmasterol	HMDB0002014	C14:1 carnitine	0.0611476	0.03	0.12	0.95 (0.88, 1.03)	0.2	0.26	1	-0.0129075
Stigmasterol	HMDB0005405	C54:3 TAG	0.0626989	0.03	0.12	1.11 (1.03, 1.19)	0.005	0.009	0	/
Stigmasterol	HMDB0005370	C54:4 TAG	0.0638929	0.02	0.1	0.95 (0.89, 1.03)	0.21	0.27	0	/
Stigmasterol	HMDB0000123	Glycine	0.0654642	0.01	0.07	0.74 (0.68, 0.81)	<0.001	<0.001	1000	-0.0370618
Stigmasterol	HMDB0007219	C36:3 DAG	0.0659654	0.02	0.09	1.22 (1.15, 1.28)	<0.001	<0.001	0	/
Stigmasterol	HMDB0001276	N1-Acetylspermidine	0.066059	0.01	0.07	0.95 (0.87, 1.02)	0.16	0.22	30	0.00645149
Stigmasterol	HMDB0011208	C34:1 PC plasmalogen	0.0662271	0.02	0.09	0.72 (0.66, 0.78)	<0.001	<0.001	0	/
Stigmasterol	HMDB0000092	Dimethylglycine	0.066464	0.02	0.08	1.00 (0.93, 1.07)	0.92	0.94	1	-0.00509167
Stigmasterol	HMDB0010169	C16:0 SM	0.066634	0.02	0.08	0.77 (0.71, 0.83)	<0.001	<0.001	0	/
Stigmasterol	HMDB0001348	C18:0 SM	0.0676886	0.01	0.07	0.97 (0.90, 1.04)	0.34	0.41	838	0.00426888
Stigmasterol	HMDB0012107	C24:1 SM	0.068413	0.01	0.07	0.79 (0.73, 0.86)	<0.001	<0.001	0	/
Stigmasterol	HMDB0003282	1-Methylguanine	0.0684205	0.01	0.07	1.01 (0.93, 1.08)	0.89	0.91	0	/
Stigmasterol	HMDB0011520	C22:0 LPE	0.0684501	0.01	0.07	0.70 (0.64, 0.77)	<0.001	<0.001	1000	-0.066154
Stigmasterol	HMDB0011130	C18:0 LPE	0.0686629	0.01	0.07	1.00 (0.94, 1.07)	0.97	0.97	1	-0.000743083
Stigmasterol	HMDB0005363	C52:4 TAG	0.070703	0.01	0.07	1.19 (1.09, 1.29)	<0.001	<0.001	0	/
Stigmasterol	HMDB0013331	C14:2 carnitine	0.0712021	0.01	0.07	0.95 (0.88, 1.02)	0.16	0.22	0	/
Stigmasterol	HMDB0000159	L-Phenylalanine	0.0724362	0.01	0.07	1.19 (1.12, 1.26)	<0.001	<0.001	499	0.012215
Stigmasterol	HMDB0011526	C22:6 LPE	0.073	0.01	0.07	0.91 (0.84, 0.98)	0.02	0.03	0	/
Stigmasterol	HMDB0005447	C54:7 TAG	0.0731519	0.009	0.07	1.06 (0.98, 1.14)	0.15	0.2	0	/
Stigmasterol	HMDB0005066	C14 carnitine	0.0735323	0.01	0.07	1.09 (1.01, 1.17)	0.03	0.05	0	/
Stigmasterol	HMDB0004956	C24:0 Ceramide	0.0738727	0.009	0.07	1.20 (1.12, 1.28)	<0.001	<0.001	0	/
Stigmasterol	HMDB0000897	7-Methylguanine	0.0763377	0.008	0.06	1.12 (1.04, 1.20)	0.002	0.004	0	/
Stigmasterol	HMDB0000248	Thyroxine	0.0773516	0.005	0.05	0.92 (0.85, 0.99)	0.03	0.04	887	-0.0317891
Stigmasterol	HMDB0008942	C38:2 PE	0.0784192	0.005	0.05	0.80 (0.74, 0.87)	<0.001	<0.001	0	/
Stigmasterol	HMDB0011243	C36:2 PC plasmalogen	0.0797873	0.004	0.04	0.68 (0.62, 0.74)	<0.001	<0.001	1	-0.00139535
Stigmasterol	HMDB0007983	C36:4 PC-A	0.0835277	0.004	0.04	0.90 (0.84, 0.97)	0.003	0.007	1000	-0.0705718
Stigmasterol	HMDB0007248	C36:4 DAG	0.0856204	0.002	0.03	1.21 (1.12, 1.31)	<0.001	<0.001	0	/
Stigmasterol	HMDB0007973	C34:2 PC	0.0894443	<0.001	0.01	1.11 (1.03, 1.20)	0.006	0.01	0	/
Stigmasterol	HMDB0029416	L-Targinine	0.0898509	<0.001	0.01	1.19 (1.11, 1.27)	<0.001	<0.001	811	0.0247696
Stigmasterol	HMDB0059824	4-Hydroxy-3-methylacetophenone	0.0916787	<0.001	0.009	1.04 (0.96, 1.13)	0.33	0.4	0	/
Stigmasterol	HMDB0000991	2-Aminooctanoic acid	0.0971203	<0.001	0.009	0.96 (0.89, 1.04)	0.33	0.4	0	/
Stigmasterol	HMDB0012102	C20:0 SM	0.0973486	<0.001	0.007	1.00 (0.92, 1.08)	0.93	0.94	0	/
Stigmasterol	HMDB0000875	Trigonelline	0.097844	<0.001	0.006	0.82 (0.76, 0.89)	<0.001	<0.001	1000	-0.0417408
Stigmasterol	HMDB0013325	C10:2 carnitine	0.0981648	<0.001	0.007	1.08 (0.99, 1.17)	0.08	0.11	707	0.0341013
Stigmasterol	HMDB0010384	C18:0 LPC	0.0989084	<0.001	0.006	0.93 (0.86, 1.00)	0.06	0.09	0	/
Stigmasterol	HMDB0005391	C54:6 TAG	0.100131	<0.001	0.008	0.99 (0.92, 1.07)	0.81	0.84	0	/
Stigmasterol	HMDB0008039	C36:2 PC	0.105614	<0.001	0.006	1.06 (0.99, 1.14)	0.09	0.13	0	/
Stigmasterol	HMDB0000187	L-Serine	0.113087	<0.001	<0.001	0.84 (0.77, 0.92)	<0.001	<0.001	4	0.010353
Stigmasterol	HMDB0002000	Myristoleic acid	0.130357	<0.001	<0.001	1.03 (0.96, 1.11)	0.39	0.46	733	0.00490896
Stigmasterol	HMDB0006347	C26 carnitine	0.132156	<0.001	<0.001	1.11 (1.03, 1.19)	0.008	0.01	269	0.00838735
Stigmasterol	HMDB0013127	C4-OH carnitine	0.148563	<0.001	<0.001	1.20 (1.11, 1.30)	<0.001	<0.001	1000	0.116759
Stigmasterol	HMDB0029377	Piperine	0.186432	<0.001	<0.001	1.16 (1.07, 1.26)	<0.001	<0.001	700	0.0104845
Stigmasterol	HMDB0003357	N-Acetylornithine	0.210885	<0.001	<0.001	0.95 (0.88, 1.02)	0.14	0.19	13	-0.00055039
Stigmasterol	HMDB0000716	L-Pipecolic acid	0.263473	<0.001	<0.001	1.12 (1.04, 1.20)	0.004	0.007	1	0.00319799
Associations between phytosterol intake and metabolites were estimated from multivariable linear regression, adjusting for age at blood draw, sex, case-control status, fasting status, body mass index, race, menopausal status and postmenopausal hormone use (NHS and NHS2 only), multivitamin use, smoking status, alcohol drinking, physical activity, baseline history of hypertension, baseline history …

## Sheet: Table S4
Table S4. Association between phytosterol intake, microbial species, and T2D metabolomic score
		Phytosterol-species association				Species-T2D metabolomic score association
Phytosterol	Species	Coef	StdErr	P	FDR	Coef	StdErr	P	FDR
Total phytosterol	Acidaminococcus intestini	-0.364215	0.250488	0.15	0.48	0.41965	0.146583	0.004	0.04
Total phytosterol	Adlercreutzia equolifaciens	0.213598	0.318418	0.5	0.8	-0.203992	0.192582	0.29	0.49
Total phytosterol	Agathobaculum butyriciproducens	0.800113	0.286659	0.005	0.1	-0.0423435	0.178097	0.81	0.91
Total phytosterol	Akkermansia muciniphila	-0.470286	0.526573	0.37	0.69	-0.030721	0.315458	0.92	0.97
Total phytosterol	Alistipes communis	0.337063	0.418889	0.42	0.74	0.0294592	0.25054	0.91	0.96
Total phytosterol	Alistipes dispar	0.10711	0.271603	0.69	0.88	-0.0752392	0.160215	0.64	0.78
Total phytosterol	Alistipes finegoldii	0.0253331	0.516948	0.96	0.98	-0.144916	0.306897	0.64	0.78
Total phytosterol	Alistipes ihumii	-0.0259232	0.365402	0.94	0.98	-0.193382	0.217045	0.37	0.58
Total phytosterol	Alistipes indistinctus	0.241654	0.361133	0.5	0.8	-0.0437731	0.217631	0.84	0.92
Total phytosterol	Alistipes onderdonkii	0.740385	0.464063	0.11	0.42	-0.23149	0.277058	0.4	0.61
Total phytosterol	Alistipes putredinis	1.18172	0.438532	0.007	0.11	-0.197874	0.26029	0.45	0.63
Total phytosterol	Alistipes senegalensis	0.27646	0.276645	0.32	0.66	-0.175969	0.165093	0.29	0.48
Total phytosterol	Alistipes shahii	0.110067	0.417291	0.79	0.91	-0.00860741	0.246513	0.97	0.98
Total phytosterol	Alistipes sp AF17 16	0.816127	0.302842	0.007	0.11	-0.497841	0.182442	0.006	0.05
Total phytosterol	Anaerobutyricum hallii	0.818959	0.400188	0.04	0.28	-0.565397	0.24167	0.02	0.09
Total phytosterol	Anaerobutyricum soehngenii	-0.134633	0.404166	0.74	0.89	0.214385	0.24313	0.38	0.58
Total phytosterol	Anaerococcus SGB53821	-0.086511	0.17391	0.62	0.84	0.197384	0.10561	0.06	0.18
Total phytosterol	Anaeromassilibacillus sp An250	-0.0427747	0.275178	0.88	0.94	-0.34844	0.166846	0.04	0.14
Total phytosterol	Anaerostipes hadrus	0.427774	0.25054	0.09	0.39	-0.328368	0.154142	0.03	0.12
Total phytosterol	Anaerotignum faecicola	0.769685	0.406387	0.06	0.32	0.352096	0.243551	0.15	0.31
Total phytosterol	Anaerotruncus massiliensis	0.300664	0.307864	0.33	0.67	-0.32103	0.186654	0.09	0.21
Total phytosterol	Bacteroides caccae	0.290574	0.40028	0.47	0.78	-0.297872	0.239506	0.21	0.39
Total phytosterol	Bacteroides cellulosilyticus	-0.1853	0.567406	0.74	0.89	-0.027648	0.330465	0.93	0.97
Total phytosterol	Bacteroides eggerthii	-0.481744	0.43046	0.26	0.61	0.0599	0.250654	0.81	0.91
Total phytosterol	Bacteroides faecis	0.233777	0.381267	0.54	0.81	0.333949	0.221484	0.13	0.28
Total phytosterol	Bacteroides finegoldii	0.130941	0.343654	0.7	0.88	0.126233	0.198641	0.53	0.7
Total phytosterol	Bacteroides fragilis	0.454403	0.437558	0.3	0.64	0.438874	0.260052	0.09	0.22
Total phytosterol	Bacteroides intestinalis	0.214432	0.351544	0.54	0.81	-0.369534	0.208376	0.08	0.2
Total phytosterol	Bacteroides nordii	-0.112078	0.367994	0.76	0.89	-0.171902	0.220571	0.44	0.63
Total phytosterol	Bacteroides ovatus	0.6784	0.401555	0.09	0.39	-0.175078	0.241557	0.47	0.65
Total phytosterol	Bacteroides salyersiae	0.0120823	0.308977	0.97	0.99	-0.153204	0.177648	0.39	0.59
Total phytosterol	Bacteroides stercoris	0.258265	0.61696	0.68	0.86	0.412927	0.356293	0.25	0.44
Total phytosterol	Bacteroides thetaiotaomicron	0.0797965	0.43969	0.86	0.94	0.122715	0.261648	0.64	0.78
Total phytosterol	Bacteroides uniformis	-0.455395	0.248476	0.07	0.35	0.0894806	0.148404	0.55	0.72
Total phytosterol	Bacteroides xylanisolvens	-0.595087	0.428593	0.16	0.52	0.493198	0.254987	0.05	0.16
Total phytosterol	Barnesiella intestinihominis	-0.142517	0.472174	0.76	0.89	-0.688792	0.275623	0.01	0.07
Total phytosterol	Bifidobacterium adolescentis	-0.437347	0.398191	0.27	0.61	-0.00694131	0.239553	0.98	0.98
Total phytosterol	Bifidobacterium bifidum	-0.593764	0.232366	0.01	0.12	0.00959087	0.1402	0.95	0.98
Total phytosterol	Bifidobacterium longum	-0.609503	0.460911	0.19	0.55	-0.353223	0.277905	0.2	0.38
Total phytosterol	Bifidobacterium pseudocatenulatum	0.204163	0.291583	0.48	0.78	-0.319347	0.175835	0.07	0.19
Total phytosterol	Bilophila wadsworthia	0.346056	0.406282	0.39	0.71	0.32526	0.24646	0.19	0.36
Total phytosterol	Blautia SGB4815	0.0191465	0.28488	0.95	0.98	-0.388128	0.171046	0.02	0.1
Total phytosterol	Blautia caecimuris	-0.679462	0.374353	0.07	0.35	0.906234	0.226631	<0.001	0.004
Total phytosterol	Blautia faecis	0.339189	0.213124	0.11	0.42	-0.0345004	0.129016	0.79	0.89
Total phytosterol	Blautia glucerasea	-0.0956697	0.330756	0.77	0.9	-0.380521	0.200578	0.06	0.17
Total phytosterol	Blautia hydrogenotrophica	-0.453711	0.260065	0.08	0.37	0.353824	0.159702	0.03	0.11
Total phytosterol	Blautia luti	0.774726	0.279241	0.006	0.1	-0.560024	0.169108	<0.001	0.02
Total phytosterol	Blautia massiliensis	0.180902	0.331915	0.59	0.84	0.273376	0.2038	0.18	0.35
Total phytosterol	Blautia obeum	0.107153	0.339614	0.75	0.89	-0.161247	0.207296	0.44	0.63
Total phytosterol	Blautia producta	-0.38056	0.296522	0.2	0.56	0.453656	0.180342	0.01	0.07
Total phytosterol	Blautia sp MSK 20 85	0.446979	0.337353	0.19	0.55	-0.320179	0.204768	0.12	0.27
Total phytosterol	Blautia stercoris	0.0376528	0.268956	0.89	0.94	-0.0297694	0.160653	0.85	0.93
Total phytosterol	Blautia wexlerae	0.482417	0.180584	0.008	0.11	-0.0056709	0.111606	0.96	0.98
Total phytosterol	Butyricicoccus sp AM29 23AC	0.261272	0.338975	0.44	0.75	-0.414756	0.20273	0.04	0.14
Total phytosterol	Butyricimonas SGB15260	-0.142273	0.333714	0.67	0.86	-0.42034	0.195021	0.03	0.12
Total phytosterol	Butyricimonas faecihominis	0.159647	0.332006	0.63	0.84	0.0905937	0.193288	0.64	0.78
Total phytosterol	Butyricimonas paravirosa	0.521341	0.319717	0.1	0.41	-0.15531	0.190774	0.42	0.62
Total phytosterol	Butyricimonas virosa	-0.346769	0.296226	0.24	0.59	0.0227961	0.175626	0.9	0.96
Total phytosterol	Candidatus Avimonas narfia	0.0495992	0.321325	0.88	0.94	-0.202304	0.195199	0.3	0.49
Total phytosterol	Candidatus Borkfalkia ceftriaxoniphila	0.427366	0.338676	0.21	0.56	-0.108512	0.206129	0.6	0.76
Total phytosterol	Candidatus Cibionibacter quicibialis	1.02343	0.377755	0.007	0.11	-0.696773	0.22868	0.002	0.03
Total phytosterol	Candidatus Gastranaerophilales bacterium	0.971071	0.316703	0.002	0.06	-0.0727773	0.191266	0.7	0.83
Total phytosterol	Candidatus Woodwardibium SGB14954	0.375669	0.234911	0.11	0.42	-0.0697189	0.138982	0.62	0.77
Total phytosterol	Christensenellaceae bacterium NSJ 63	-0.304797	0.232691	0.19	0.56	-0.0336207	0.142844	0.81	0.91
Total phytosterol	Clostridia bacterium	-0.58693	0.323918	0.07	0.35	0.497703	0.192203	0.01	0.06
Total phytosterol	Clostridia bacterium UC5 1 1E11	-0.324799	0.26311	0.22	0.56	0.172951	0.162111	0.29	0.48
Total phytosterol	Clostridiaceae bacterium	0.538772	0.208066	0.01	0.12	0.138328	0.128184	0.28	0.48
Total phytosterol	Clostridiaceae bacterium AF18 31LB	1.40733	0.377073	<0.001	0.01	-0.21511	0.234433	0.36	0.57
Total phytosterol	Clostridiaceae bacterium Marseille Q3526	-0.0436532	0.250905	0.86	0.94	0.471079	0.153357	0.002	0.03
Total phytosterol	Clostridiaceae bacterium Marseille Q4143	1.12594	0.371787	0.002	0.06	-0.587139	0.227314	0.01	0.06
Total phytosterol	Clostridiaceae bacterium Marseille Q4145	0.401852	0.300202	0.18	0.55	-0.18936	0.182627	0.3	0.49
Total phytosterol	Clostridiaceae bacterium Marseille Q4149	-0.107426	0.379562	0.78	0.91	-0.42423	0.221556	0.06	0.16
Total phytosterol	Clostridiaceae unclassified SGB15090	0.0174017	0.330455	0.96	0.98	-0.013139	0.195808	0.95	0.98
Total phytosterol	Clostridiaceae unclassified SGB4747	-0.17738	0.269283	0.51	0.8	0.450823	0.160857	0.005	0.05
Total phytosterol	Clostridiaceae unclassified SGB4771	0.524202	0.217588	0.02	0.15	0.0218317	0.132416	0.87	0.94
Total phytosterol	Clostridiales Family XIII bacterium BX16	-0.121282	0.323109	0.71	0.88	0.0897493	0.196686	0.65	0.79
Total phytosterol	Clostridiales bacterium	0.278143	0.27292	0.31	0.65	0.643574	0.164193	<0.001	0.004
Total phytosterol	Clostridiales bacterium Choco116	0.0788654	0.314043	0.8	0.92	0.380953	0.188422	0.04	0.14
Total phytosterol	Clostridiales bacterium KLE1615	0.462115	0.289696	0.11	0.42	0.0251658	0.175879	0.89	0.95
Total phytosterol	Clostridium SGB4648	0.201324	0.35322	0.57	0.82	-0.597269	0.210121	0.004	0.04
Total phytosterol	Clostridium SGB4750	0.211251	0.336122	0.53	0.81	0.185109	0.20424	0.36	0.57
Total phytosterol	Clostridium butyricum	-0.281956	0.225532	0.21	0.56	0.199887	0.139588	0.15	0.31
Total phytosterol	Clostridium fessum	0.872713	0.388278	0.02	0.2	-0.260537	0.234208	0.27	0.47
Total phytosterol	Clostridium leptum	-1.09995	0.305673	<0.001	0.02	0.0396227	0.193169	0.84	0.92
Total phytosterol	Clostridium scindens	-0.26903	0.281019	0.34	0.67	0.475515	0.171191	0.005	0.05
Total phytosterol	Clostridium sp 1001270H 150608 G6	0.50272	0.437975	0.25	0.6	-0.538187	0.264122	0.04	0.14
Total phytosterol	Clostridium sp AF20 17LB	0.717736	0.32178	0.03	0.2	-0.542942	0.19916	0.006	0.05
Total phytosterol	Clostridium sp AF27 2AA	0.468795	0.317975	0.14	0.47	-0.236748	0.194241	0.22	0.4
Total phytosterol	Clostridium sp AF34 10BH	0.783306	0.373677	0.04	0.25	-0.21129	0.227042	0.35	0.56
Total phytosterol	Clostridium sp AF34 13	0.680429	0.352501	0.05	0.32	-0.153318	0.214918	0.48	0.66
Total phytosterol	Clostridium sp AF36 4	0.151929	0.454196	0.74	0.89	-0.385605	0.275327	0.16	0.33
Total phytosterol	Clostridium sp AM22 11AC	1.19159	0.431937	0.006	0.1	-0.0719004	0.26277	0.78	0.89
Total phytosterol	Clostridium sp AM33 3	1.28077	0.345239	<0.001	0.01	-0.399793	0.212358	0.06	0.17
Total phytosterol	Clostridium sp AM49 4BH	0.0473478	0.426757	0.91	0.95	-0.0994822	0.258512	0.7	0.83
Total phytosterol	Clostridium sp AT4	-0.0269513	0.332526	0.94	0.97	0.72205	0.203453	<0.001	0.01
Total phytosterol	Clostridium spiroforme	-0.0289527	0.246558	0.91	0.95	0.0123653	0.150307	0.93	0.97
Total phytosterol	Clostridium symbiosum	-0.799849	0.269662	0.003	0.07	0.576609	0.166192	<0.001	0.01
Total phytosterol	Collinsella SGB14861	-0.467284	0.41954	0.27	0.61	0.068342	0.254191	0.79	0.89
Total phytosterol	Collinsella SGB4121	0.00023129	0.263999	1	1	-0.0592269	0.159023	0.71	0.84
Total phytosterol	Collinsella aerofaciens	-0.190813	0.259905	0.46	0.77	-0.00959508	0.158284	0.95	0.98
Total phytosterol	Coprobacter fastidiosus	0.128353	0.289804	0.66	0.86	0.0681044	0.172145	0.69	0.82
Total phytosterol	Coprococcus SGB4669	0.495351	0.297796	0.1	0.4	-0.343956	0.177835	0.05	0.16
Total phytosterol	Coprococcus catus	0.519863	0.394163	0.19	0.55	-0.55204	0.237346	0.02	0.09
Total phytosterol	Coprococcus comes	0.356337	0.380504	0.35	0.67	-0.117234	0.227574	0.61	0.76
Total phytosterol	Coprococcus eutactus	0.361685	0.417439	0.39	0.7	-0.578295	0.249055	0.02	0.09
Total phytosterol	Desulfovibrio SGB5077	0.13662	0.345402	0.69	0.88	-0.201773	0.208224	0.33	0.54
Total phytosterol	Dialister invisus	-0.377528	0.507361	0.46	0.77	-0.0382749	0.302804	0.9	0.96
Total phytosterol	Dorea formicigenerans	0.449807	0.26443	0.09	0.39	0.146581	0.16265	0.37	0.57
Total phytosterol	Dorea longicatena	-0.0510798	0.318191	0.87	0.94	-0.157148	0.192425	0.41	0.62
Total phytosterol	Dorea sp AF24 7LB	0.329016	0.296707	0.27	0.61	-0.163475	0.177664	0.36	0.57
Total phytosterol	Dorea sp AF36 15AT	0.308834	0.301735	0.31	0.65	-0.12596	0.184795	0.5	0.67
Total phytosterol	Dysosmobacter sp BX15	0.871981	0.454963	0.06	0.32	-0.567891	0.275045	0.04	0.14
Total phytosterol	Dysosmobacter sp NSJ 60	0.141339	0.280537	0.61	0.84	0.451549	0.170336	0.008	0.06
Total phytosterol	Dysosmobacter welbionis	0.43867	0.248378	0.08	0.36	0.43588	0.153433	0.004	0.04
Total phytosterol	Eggerthella lenta	-0.388716	0.364781	0.29	0.64	0.396351	0.219784	0.07	0.19
Total phytosterol	Eisenbergiella massiliensis	-0.198807	0.330002	0.55	0.81	-0.063878	0.200211	0.75	0.86
Total phytosterol	Eisenbergiella tayi	-0.160826	0.257851	0.53	0.81	0.0211336	0.158543	0.89	0.96
Total phytosterol	Enterocloster SGB14313	-0.273727	0.313114	0.38	0.7	-0.0672237	0.186146	0.72	0.84
Total phytosterol	Enterocloster aldenensis	-0.586677	0.229835	0.01	0.12	0.514862	0.141349	<0.001	0.008
Total phytosterol	Enterocloster bolteae	-0.407418	0.344819	0.24	0.58	0.870207	0.210129	<0.001	0.002
Total phytosterol	Enterocloster citroniae	-0.071626	0.229083	0.75	0.89	0.463072	0.139401	<0.001	0.02
Total phytosterol	Enterocloster lavalensis	-0.423919	0.261449	0.1	0.41	0.507809	0.159871	0.001	0.03
Total phytosterol	Erysipelatoclostridium ramosum	-0.0140868	0.318368	0.96	0.99	0.460172	0.195001	0.02	0.09
Total phytosterol	Escherichia coli	0.0583102	0.346617	0.87	0.94	0.658707	0.210368	0.002	0.03
Total phytosterol	Eubacteriaceae bacterium	0.428627	0.355682	0.23	0.57	-0.345563	0.21496	0.11	0.25
Total phytosterol	Eubacteriales unclassified SGB15145	0.649747	0.260495	0.01	0.14	-0.388932	0.16102	0.02	0.08
Total phytosterol	Eubacterium SGB4671	-0.28646	0.208172	0.17	0.52	-0.0725934	0.123615	0.56	0.73
Total phytosterol	Eubacterium SGB6276	0.264534	0.386677	0.49	0.8	-0.86609	0.229566	<0.001	0.007
Total phytosterol	Eubacterium ramulus	0.147368	0.379294	0.7	0.88	-0.133674	0.228931	0.56	0.73
Total phytosterol	Eubacterium rectale	0.636375	0.343155	0.06	0.35	0.0224387	0.211118	0.92	0.97
Total phytosterol	Eubacterium siraeum	-0.329534	0.526899	0.53	0.81	-0.636973	0.316057	0.04	0.14
Total phytosterol	Eubacterium sp AF16 48	-0.169707	0.298262	0.57	0.82	-0.271437	0.179972	0.13	0.28
Total phytosterol	Eubacterium ventriosum	0.277476	0.347099	0.42	0.74	-0.111268	0.207415	0.59	0.75
Total phytosterol	Evtepia gabavorous	0.00450784	0.365791	0.99	1	0.679469	0.219429	0.002	0.03
Total phytosterol	Faecalibacillus faecis	-0.281314	0.296807	0.34	0.67	0.18616	0.17715	0.29	0.49
Total phytosterol	Faecalibacillus intestinalis	1.16335	0.374983	0.002	0.06	-0.628344	0.224986	0.005	0.05
Total phytosterol	Faecalibacterium SGB15315	0.749348	0.421074	0.08	0.36	-0.240775	0.25339	0.34	0.55
Total phytosterol	Faecalibacterium SGB15346	0.380145	0.391915	0.33	0.67	-0.688436	0.232587	0.003	0.04
Total phytosterol	Faecalibacterium prausnitzii	0.428369	0.177164	0.02	0.15	-0.29431	0.109267	0.007	0.06
Total phytosterol	Faecalicatena fissicatena	0.462547	0.413598	0.26	0.61	-0.623645	0.246638	0.01	0.07
Total phytosterol	Firmicutes bacterium AF16 15	1.12844	0.366187	0.002	0.06	-0.340062	0.22441	0.13	0.28
Total phytosterol	Flavonifractor plautii	0.0589306	0.376809	0.88	0.94	1.07839	0.226866	<0.001	<0.001
Total phytosterol	Fusicatenibacter saccharivorans	0.453494	0.232341	0.05	0.31	0.0769573	0.142479	0.59	0.75
Total phytosterol	GGB13404 SGB14252	0.549747	0.270339	0.04	0.28	-0.355231	0.165633	0.03	0.12
Total phytosterol	GGB16040 SGB9347	0.163165	0.34195	0.63	0.84	-0.409986	0.205384	0.05	0.15
Total phytosterol	GGB2653 SGB3574	-0.36892	0.302781	0.22	0.56	0.158285	0.185884	0.39	0.6
Total phytosterol	GGB2970 SGB3952	0.324861	0.226286	0.15	0.49	-0.232217	0.137668	0.09	0.22
Total phytosterol	GGB2980 SGB3962	0.0398927	0.213772	0.85	0.94	-0.072017	0.129659	0.58	0.74
Total phytosterol	GGB2982 SGB3964	0.287991	0.303384	0.34	0.67	-0.0897139	0.183269	0.62	0.78
Total phytosterol	GGB2998 SGB3988	0.128258	0.267398	0.63	0.84	-0.0098048	0.161893	0.95	0.98
Total phytosterol	GGB3005 SGB3996	0.266914	0.374299	0.48	0.78	0.102264	0.227939	0.65	0.79
Total phytosterol	GGB3109 SGB4643	-0.0610021	0.356899	0.86	0.94	-0.78095	0.212101	<0.001	0.008
Total phytosterol	GGB3167 SGB4181	0.129438	0.278893	0.64	0.85	-0.367379	0.166964	0.03	0.11
Total phytosterol	GGB3175 SGB4191	0.316663	0.333181	0.34	0.67	-0.42638	0.199517	0.03	0.12
Total phytosterol	GGB3256 SGB4303	0.514152	0.415982	0.22	0.56	-0.477408	0.247186	0.05	0.16
Total phytosterol	GGB3277 SGB4327	-0.0946456	0.177557	0.59	0.84	-0.132366	0.108274	0.22	0.4
Total phytosterol	GGB3278 SGB4328	-0.056603	0.245728	0.82	0.92	-0.130985	0.146746	0.37	0.58
Total phytosterol	GGB32900 SGB53446	0.273588	0.290034	0.35	0.67	-0.116809	0.178622	0.51	0.69
Total phytosterol	GGB3304 SGB4367	-0.19345	0.375546	0.61	0.84	-0.402144	0.222363	0.07	0.19
Total phytosterol	GGB3321 SGB4394	0.566371	0.250732	0.02	0.2	-0.373979	0.150904	0.01	0.07
Total phytosterol	GGB33469 SGB15236	0.393738	0.382024	0.3	0.65	-0.52252	0.225958	0.02	0.09
Total phytosterol	GGB33512 SGB15201	-0.0590512	0.301017	0.84	0.94	-0.191364	0.183486	0.3	0.49
Total phytosterol	GGB33512 SGB15203	0.0818011	0.30311	0.79	0.91	-0.348211	0.181311	0.05	0.16
Total phytosterol	GGB33586 SGB53517	0.476606	0.279051	0.09	0.39	0.0564847	0.173304	0.74	0.86
Total phytosterol	GGB33928 SGB15225	-0.368399	0.294446	0.21	0.56	-0.132114	0.178843	0.46	0.64
Total phytosterol	GGB3475 SGB4638	-0.212247	0.255604	0.41	0.72	-0.396883	0.153181	0.01	0.06
Total phytosterol	GGB34797 SGB14322	0.446234	0.243019	0.07	0.35	-0.0935999	0.144215	0.52	0.69
Total phytosterol	GGB3486 SGB4658	0.070848	0.217796	0.74	0.89	-0.333442	0.130548	0.01	0.07
Total phytosterol	GGB3510 SGB4687	0.320618	0.248549	0.2	0.56	-0.308355	0.150911	0.04	0.14
Total phytosterol	GGB3537 SGB4727	0.284222	0.23302	0.22	0.56	0.00478599	0.14347	0.97	0.98
Total phytosterol	GGB3548 SGB4744	0.412062	0.22626	0.07	0.35	0.221892	0.135418	0.1	0.24
Total phytosterol	GGB3570 SGB4777	0.387264	0.254034	0.13	0.45	-0.459809	0.153789	0.003	0.04
Total phytosterol	GGB3602 SGB4574	-0.471834	0.317513	0.14	0.46	0.600912	0.189035	0.001	0.03
Total phytosterol	GGB3612 SGB4882	-0.185337	0.365388	0.61	0.84	-0.391476	0.222071	0.08	0.2
Total phytosterol	GGB3614 SGB4886	-0.402627	0.336874	0.23	0.58	-0.397895	0.199757	0.05	0.15
Total phytosterol	GGB3619 SGB4894	0.453771	0.303131	0.13	0.46	-0.276449	0.179764	0.12	0.28
Total phytosterol	GGB36267 SGB14177	-0.353128	0.27692	0.2	0.56	-0.220242	0.170158	0.2	0.37
Total phytosterol	GGB3653 SGB4964	0.670885	0.333702	0.04	0.28	-0.748104	0.201137	<0.001	0.008
Total phytosterol	GGB3746 SGB5089	0.668598	0.399781	0.09	0.4	-0.403753	0.242871	0.1	0.23
Total phytosterol	GGB3819 SGB5184	0.3919	0.293919	0.18	0.55	0.83518	0.176763	<0.001	<0.001
Total phytosterol	GGB38744 SGB14842	-0.273554	0.25641	0.29	0.64	0.125117	0.159857	0.43	0.63
Total phytosterol	GGB42994 SGB4746	-0.00255086	0.328022	0.99	1	0.607021	0.197505	0.002	0.03
Total phytosterol	GGB45432 SGB63101	-0.0624282	0.203864	0.76	0.89	-0.0597902	0.12491	0.63	0.78
Total phytosterol	GGB4566 SGB6305	0.559086	0.289232	0.05	0.32	-0.35029	0.173776	0.04	0.14
Total phytosterol	GGB4567 SGB6308	0.153146	0.241928	0.53	0.81	-0.242527	0.143284	0.09	0.22
Total phytosterol	GGB4571 SGB6317	0.324964	0.214128	0.13	0.45	-0.164401	0.128411	0.2	0.38
Total phytosterol	GGB4745 SGB6571	-0.318757	0.301716	0.29	0.64	-0.310476	0.178748	0.08	0.21
Total phytosterol	GGB47687 SGB2286	-0.135854	0.321287	0.67	0.86	-0.345608	0.191094	0.07	0.19
Total phytosterol	GGB4802 SGB6641	0.117478	0.232152	0.61	0.84	0.0630554	0.141926	0.66	0.8
Total phytosterol	GGB51139 SGB71360	-0.271359	0.19657	0.17	0.52	0.181452	0.120285	0.13	0.28
Total phytosterol	GGB51269 SGB5062	0.00512981	0.262913	0.98	0.99	-0.216449	0.159703	0.18	0.35
Total phytosterol	GGB51647 SGB4348	-0.299966	0.332083	0.37	0.69	-0.293968	0.197878	0.14	0.29
Total phytosterol	GGB52130 SGB14966	0.629937	0.265302	0.02	0.16	-0.0942702	0.163792	0.56	0.73
Total phytosterol	GGB5980 SGB8599	0.477118	0.249637	0.06	0.32	-0.00396652	0.149584	0.98	0.98
Total phytosterol	GGB6612 SGB9346	0.156394	0.286691	0.59	0.84	0.207324	0.169022	0.22	0.4
Total phytosterol	GGB79630 SGB13983	0.279619	0.296649	0.35	0.67	-0.265169	0.180049	0.14	0.3
Total phytosterol	GGB79734 SGB15291	1.23535	0.369242	<0.001	0.03	-0.585146	0.222009	0.008	0.06
Total phytosterol	GGB79890 SGB14770	0.215773	0.336409	0.52	0.81	-0.149968	0.198054	0.45	0.63
Total phytosterol	GGB79973 SGB14341	0.0652769	0.347118	0.85	0.94	-0.0113071	0.206885	0.96	0.98
Total phytosterol	GGB79998 SGB48024	0.37963	0.295694	0.2	0.56	-0.269089	0.185805	0.15	0.31
Total phytosterol	GGB80011 SGB15265	0.226981	0.360302	0.53	0.81	-0.147284	0.213653	0.49	0.67
Total phytosterol	GGB80011 SGB15267	0.406185	0.231619	0.08	0.37	-0.0318048	0.137679	0.82	0.91
Total phytosterol	GGB80140 SGB15224	-0.00577066	0.313611	0.99	0.99	-0.333022	0.185222	0.07	0.19
Total phytosterol	GGB9062 SGB13981	0.138011	0.261854	0.6	0.84	-0.349002	0.159198	0.03	0.11
Total phytosterol	GGB9063 SGB13982	-0.169449	0.322159	0.6	0.84	-0.249642	0.195193	0.2	0.38
Total phytosterol	GGB9109 SGB14042	-0.129471	0.256627	0.61	0.84	-0.392619	0.152981	0.01	0.07
Total phytosterol	GGB9115 SGB14048	0.245439	0.246355	0.32	0.66	-0.179122	0.148729	0.23	0.41
Total phytosterol	GGB9176 SGB14114	-0.184117	0.372982	0.62	0.84	-0.402798	0.2208	0.07	0.19
Total phytosterol	GGB9210 SGB14149	0.0703453	0.209307	0.74	0.89	-0.151217	0.125712	0.23	0.41
Total phytosterol	GGB9211 SGB14151	0.15863	0.202726	0.43	0.74	-0.133293	0.119988	0.27	0.47
Total phytosterol	GGB9237 SGB14179	0.246579	0.236162	0.3	0.64	-0.228747	0.143325	0.11	0.26
Total phytosterol	GGB9240 SGB14182	0.0535104	0.236063	0.82	0.92	-0.0908468	0.14205	0.52	0.7
Total phytosterol	GGB9296 SGB14253	-0.262328	0.265733	0.32	0.66	-0.397135	0.159955	0.01	0.07
Total phytosterol	GGB9342 SGB14306	-0.687023	0.423281	0.1	0.41	-0.568436	0.252911	0.02	0.1
Total phytosterol	GGB9345 SGB14311	-0.551351	0.366834	0.13	0.45	-0.439752	0.216936	0.04	0.14
Total phytosterol	GGB9350 SGB14317	-0.261845	0.303608	0.39	0.7	-0.357375	0.179845	0.05	0.15
Total phytosterol	GGB9453 SGB14844	0.0400228	0.292161	0.89	0.94	-0.431948	0.175702	0.01	0.08
Total phytosterol	GGB9480 SGB14874	0.341038	0.380117	0.37	0.69	0.329529	0.23019	0.15	0.31
Total phytosterol	GGB9495 SGB14892	-0.268213	0.300933	0.37	0.69	-0.436425	0.18112	0.02	0.08
Total phytosterol	GGB9512 SGB14909	-0.396659	0.421763	0.35	0.67	0.4611	0.253242	0.07	0.19
Total phytosterol	GGB9522 SGB14921	0.183978	0.162167	0.26	0.61	-0.0746462	0.0990677	0.45	0.63
Total phytosterol	GGB9524 SGB14923	-0.47245	0.262127	0.07	0.35	0.338472	0.157219	0.03	0.12
Total phytosterol	GGB9524 SGB14924	1.40662	0.351461	<0.001	0.007	-0.491871	0.211906	0.02	0.09
Total phytosterol	GGB9531 SGB14932	0.442598	0.29279	0.13	0.45	-0.195923	0.178959	0.27	0.47
Total phytosterol	GGB9534 SGB14937	0.0697962	0.31293	0.82	0.92	-0.0114831	0.191186	0.95	0.98
Total phytosterol	GGB9551 SGB14958	-0.139184	0.19658	0.48	0.78	-0.195171	0.117562	0.1	0.23
Total phytosterol	GGB9602 SGB15028	-0.223493	0.264959	0.4	0.72	-0.0201488	0.159248	0.9	0.96
Total phytosterol	GGB9602 SGB15031	-0.0134248	0.415385	0.97	0.99	-0.560771	0.245877	0.02	0.1
Total phytosterol	GGB9614 SGB15049	0.401565	0.30964	0.19	0.56	-0.245096	0.191542	0.2	0.38
Total phytosterol	GGB9619 SGB15066	0.747888	0.282856	0.008	0.11	-0.0397119	0.172527	0.82	0.91
Total phytosterol	GGB9619 SGB15067	0.286572	0.295016	0.33	0.67	-0.138951	0.178588	0.44	0.63
Total phytosterol	GGB9621 SGB15073	0.567645	0.28026	0.04	0.28	-0.0608674	0.171484	0.72	0.84
Total phytosterol	GGB9627 SGB15081	0.111857	0.286375	0.7	0.88	0.11321	0.172193	0.51	0.69
Total phytosterol	GGB9634 SGB15093	-0.0517093	0.32806	0.87	0.94	-0.185888	0.193469	0.34	0.54
Total phytosterol	GGB9635 SGB15106	0.181418	0.36005	0.61	0.84	-0.569562	0.21143	0.007	0.06
Total phytosterol	GGB9677 SGB15180	-0.0951096	0.303885	0.75	0.89	-0.478158	0.180391	0.008	0.06
Total phytosterol	GGB9699 SGB15216	0.949098	0.375727	0.01	0.13	-0.0975396	0.228942	0.67	0.81
Total phytosterol	GGB9707 SGB15229	-0.173563	0.337838	0.61	0.84	-0.387378	0.203977	0.06	0.17
Total phytosterol	GGB9708 SGB15233	-0.304838	0.314633	0.33	0.67	-0.443743	0.185418	0.02	0.08
Total phytosterol	GGB9708 SGB15234	-0.409788	0.464213	0.38	0.7	-0.611959	0.274695	0.03	0.11
Total phytosterol	GGB9712 SGB15244	-0.376936	0.345678	0.28	0.62	-0.839801	0.203484	<0.001	0.002
Total phytosterol	GGB9713 SGB15249	0.36333	0.452888	0.42	0.74	-0.70693	0.268643	0.009	0.06
Total phytosterol	GGB9719 SGB15273	-0.0840926	0.242725	0.73	0.89	0.052018	0.14798	0.73	0.84
Total phytosterol	GGB9747 SGB15356	-0.125393	0.369812	0.73	0.89	-0.442699	0.218052	0.04	0.14
Total phytosterol	GGB9758 SGB15368	0.802765	0.379909	0.03	0.25	-0.669966	0.222006	0.003	0.03
Total phytosterol	GGB9759 SGB15370	0.433293	0.338041	0.2	0.56	0.217452	0.201298	0.28	0.48
Total phytosterol	GGB9760 SGB15373	0.896591	0.384264	0.02	0.17	-0.534726	0.228339	0.02	0.09
Total phytosterol	GGB9760 SGB15374	-0.394471	0.332257	0.24	0.58	-0.133951	0.194283	0.49	0.67
Total phytosterol	GGB9765 SGB15382	0.16745	0.286409	0.56	0.82	-0.189703	0.171671	0.27	0.47
Total phytosterol	GGB9770 SGB15390	0.210094	0.372603	0.57	0.83	-0.300604	0.224909	0.18	0.36
Total phytosterol	GGB9775 SGB15395	0.58845	0.32688	0.07	0.35	-0.399985	0.197396	0.04	0.14
Total phytosterol	GGB9781 SGB66170	0.101648	0.238854	0.67	0.86	-0.24914	0.145616	0.09	0.22
Total phytosterol	GGB9782 SGB15403	-0.227863	0.230047	0.32	0.66	-0.315302	0.136725	0.02	0.09
Total phytosterol	GGB9818 SGB15459	0.112369	0.249906	0.65	0.85	-0.0455117	0.152146	0.76	0.88
Total phytosterol	Gemmiger SGB15295	0.762108	0.370794	0.04	0.28	-0.0538436	0.218785	0.81	0.91
Total phytosterol	Gemmiger SGB15299	0.58955	0.362606	0.1	0.41	-0.296533	0.216089	0.17	0.34
Total phytosterol	Gemmiger formicilis	0.0688533	0.463692	0.88	0.94	-0.465437	0.280144	0.1	0.23
Total phytosterol	Gordonibacter pamelaeae	-0.314075	0.256902	0.22	0.56	0.191322	0.155901	0.22	0.4
Total phytosterol	Gordonibacter urolithinfaciens	-0.121983	0.214033	0.57	0.82	-0.0107971	0.129571	0.93	0.97
Total phytosterol	Haemophilus parainfluenzae	-0.385075	0.217865	0.08	0.36	0.08015	0.136983	0.56	0.73
Total phytosterol	Holdemanella porci	0.168142	0.26022	0.52	0.81	0.15944	0.152654	0.3	0.49
Total phytosterol	Holdemania filiformis	0.0431785	0.265474	0.87	0.94	0.287168	0.16052	0.07	0.19
Total phytosterol	Hungatella hathewayi	-0.386383	0.250409	0.12	0.45	0.23573	0.156197	0.13	0.28
Total phytosterol	Hydrogenoanaerobacterium saccharovorans	-0.0686926	0.307529	0.82	0.92	0.00239789	0.186248	0.99	0.99
Total phytosterol	Intestinimonas butyriciproducens	0.83361	0.344896	0.02	0.15	0.366676	0.210933	0.08	0.21
Total phytosterol	Intestinimonas massiliensis	-0.0630811	0.313582	0.84	0.93	-0.185032	0.190579	0.33	0.54
Total phytosterol	Lachnospira eligens	0.35951	0.444587	0.42	0.74	-0.232296	0.26754	0.39	0.59
Total phytosterol	Lachnospira pectinoschiza	-0.147043	0.430615	0.73	0.89	0.0568538	0.25961	0.83	0.91
Total phytosterol	Lachnospira sp NSJ 43	0.678728	0.43584	0.12	0.44	-0.748185	0.261041	0.004	0.04
Total phytosterol	Lachnospiraceae bacterium	0.244014	0.359482	0.5	0.8	-0.339737	0.219672	0.12	0.27
Total phytosterol	Lachnospiraceae bacterium AM48 27BH	0.840699	0.341349	0.01	0.15	-0.535549	0.206184	0.009	0.06
Total phytosterol	Lachnospiraceae bacterium BX3	0.237325	0.205654	0.25	0.6	-0.379211	0.126185	0.003	0.03
Total phytosterol	Lachnospiraceae bacterium Marseille Q4251	0.727005	0.308943	0.02	0.17	-0.497639	0.186791	0.008	0.06
Total phytosterol	Lachnospiraceae bacterium OM04 12BH	-0.0395771	0.299504	0.89	0.94	-0.414754	0.179182	0.02	0.09
Total phytosterol	Lacrimispora amygdalina	0.0811706	0.380826	0.83	0.93	-0.0508918	0.232568	0.83	0.91
Total phytosterol	Lacrimispora celerecrescens	-0.10882	0.391987	0.78	0.91	-0.31921	0.238053	0.18	0.35
Total phytosterol	Lawsonibacter asaccharolyticus	0.834452	0.259656	0.001	0.04	0.108624	0.162387	0.5	0.68
Total phytosterol	Lawsonibacter sp NSJ 51	0.380279	0.305781	0.21	0.56	-0.164218	0.18666	0.38	0.58
Total phytosterol	Longicatena caecimuris	-0.521754	0.271204	0.05	0.32	0.254109	0.164371	0.12	0.27
Total phytosterol	Massilistercora timonensis	-0.145696	0.240013	0.54	0.81	-0.19134	0.144517	0.19	0.36
Total phytosterol	Mediterraneibacter butyricigenes	0.0658478	0.286688	0.82	0.92	-0.103734	0.174304	0.55	0.72
Total phytosterol	Mediterraneibacter glycyrrhizinilyticus	-0.224474	0.287309	0.43	0.74	1.00539	0.173114	<0.001	<0.001
Total phytosterol	Methanobrevibacter smithii	-0.423094	0.374537	0.26	0.61	-0.718327	0.22171	0.001	0.03
Total phytosterol	Methylobacterium SGB15164	0.909726	0.356316	0.01	0.12	0.0431757	0.218022	0.84	0.92
Total phytosterol	Monoglobus pectinilyticus	0.407286	0.464073	0.38	0.7	0.296999	0.277732	0.28	0.48
Total phytosterol	Negativibacillus massiliensis	-0.212195	0.350262	0.54	0.81	-0.405605	0.207955	0.05	0.16
Total phytosterol	Neglectibacter timonensis	-1.09382	0.332061	<0.001	0.04	-0.11487	0.206218	0.58	0.74
Total phytosterol	Nitrosopumilus SGB14899	0.0716651	0.325051	0.83	0.92	0.0330228	0.198136	0.87	0.94
Total phytosterol	Odoribacter splanchnicus	0.41543	0.322196	0.2	0.56	0.00843979	0.193152	0.97	0.98
Total phytosterol	Oscillibacter sp ER4	0.796364	0.4548	0.08	0.37	-0.845921	0.270148	0.002	0.03
Total phytosterol	Oscillospiraceae bacterium	-0.166249	0.330995	0.62	0.84	0.151115	0.197922	0.45	0.63
Total phytosterol	Oscillospiraceae bacterium BX1	0.138016	0.193264	0.48	0.78	-0.282849	0.116093	0.01	0.08
Total phytosterol	Oscillospiraceae bacterium Marseille Q3528	0.590216	0.295422	0.05	0.29	-0.361875	0.179627	0.04	0.14
Total phytosterol	Parabacteroides distasonis	-0.438982	0.355994	0.22	0.56	0.134328	0.211526	0.53	0.7
Total phytosterol	Parabacteroides goldsteinii	0.767721	0.348755	0.03	0.21	-0.382605	0.207569	0.07	0.18
Total phytosterol	Parabacteroides johnsonii	0.299536	0.284779	0.29	0.64	0.133415	0.166399	0.42	0.62
Total phytosterol	Parabacteroides merdae	-0.63097	0.439999	0.15	0.49	0.140518	0.258451	0.59	0.75
Total phytosterol	Paraprevotella clara	-0.148654	0.394802	0.71	0.88	0.187406	0.229402	0.41	0.62
Total phytosterol	Parasutterella SGB9260	-0.165248	0.319885	0.61	0.84	0.325581	0.184506	0.08	0.2
Total phytosterol	Parasutterella excrementihominis	-0.510722	0.41921	0.22	0.56	-0.492806	0.249724	0.05	0.15
Total phytosterol	Phascolarctobacterium SGB4573	-0.130867	0.324376	0.69	0.88	0.252924	0.196277	0.2	0.38
Total phytosterol	Phascolarctobacterium faecium	1.99398	0.494698	<0.001	0.007	0.379736	0.299179	0.2	0.38
Total phytosterol	Phocaeicola SGB6473	-0.144321	0.234971	0.54	0.81	-0.319539	0.139695	0.02	0.1
Total phytosterol	Phocaeicola dorei	-0.0369881	0.623754	0.95	0.98	0.472577	0.362851	0.19	0.37
Total phytosterol	Phocaeicola massiliensis	-0.329207	0.418251	0.43	0.74	0.0968795	0.242169	0.69	0.82
Total phytosterol	Phocaeicola vulgatus	-0.542492	0.392343	0.17	0.52	-0.0972301	0.231125	0.67	0.81
Total phytosterol	Prevotella copri clade A	0.283792	0.398191	0.48	0.78	-0.0835166	0.238417	0.73	0.84
Total phytosterol	Pseudoruminococcus massiliensis	0.0310072	0.241295	0.9	0.94	-0.230138	0.145259	0.11	0.26
Total phytosterol	Rheinheimera SGB14999	-0.166233	0.269685	0.54	0.81	0.1563	0.164598	0.34	0.55
Total phytosterol	Rikenellaceae bacterium	0.0640852	0.27685	0.82	0.92	0.324781	0.160993	0.04	0.14
Total phytosterol	Romboutsia timonensis	-0.109351	0.238958	0.65	0.85	-0.370124	0.144445	0.01	0.07
Total phytosterol	Roseburia faecis	0.189002	0.436424	0.66	0.86	-0.206866	0.264624	0.43	0.63
Total phytosterol	Roseburia hominis	0.880643	0.330897	0.008	0.11	-0.138625	0.202644	0.49	0.67
Total phytosterol	Roseburia intestinalis	0.136882	0.416391	0.74	0.89	0.192211	0.252305	0.45	0.63
Total phytosterol	Roseburia inulinivorans	0.830297	0.388041	0.03	0.24	0.473622	0.23452	0.04	0.14
Total phytosterol	Roseburia sp AF02 12	0.306372	0.460154	0.51	0.8	-0.574721	0.278998	0.04	0.14
Total phytosterol	Roseburia sp AM16 25	0.826491	0.293894	0.005	0.1	-0.278034	0.181719	0.13	0.28
Total phytosterol	Ruminococcaceae bacterium D5	-0.269924	0.179601	0.13	0.45	-0.0107897	0.11041	0.92	0.97
Total phytosterol	Ruminococcus SGB4421	0.233399	0.305102	0.44	0.75	-0.258775	0.181842	0.15	0.32
Total phytosterol	Ruminococcus bicirculans	1.05287	0.461584	0.02	0.19	-0.794582	0.276045	0.004	0.04
Total phytosterol	Ruminococcus bromii	0.485067	0.540232	0.37	0.69	-0.702622	0.323601	0.03	0.12
Total phytosterol	Ruminococcus callidus	0.405419	0.290067	0.16	0.52	-0.19231	0.174123	0.27	0.47
Total phytosterol	Ruminococcus gnavus	-0.660704	0.42478	0.12	0.44	0.676434	0.259764	0.009	0.06
Total phytosterol	Ruminococcus lactaris	1.09916	0.456836	0.02	0.15	-0.425044	0.278561	0.13	0.28
Total phytosterol	Ruminococcus sp BSD2780120874 150323 B10	0.0866385	0.353812	0.81	0.92	-0.0781346	0.212489	0.71	0.84
Total phytosterol	Ruminococcus torques	0.254535	0.240224	0.29	0.64	0.116272	0.14966	0.44	0.63
Total phytosterol	Ruthenibacterium lactatiformans	-0.553756	0.253835	0.03	0.22	0.374389	0.156365	0.02	0.08
Total phytosterol	Sanguibacter SGB15121	-0.167114	0.22502	0.46	0.77	-0.329848	0.134551	0.01	0.08
Total phytosterol	Sellimonas intestinalis	-0.184344	0.223864	0.41	0.73	-0.0242036	0.136757	0.86	0.93
Total phytosterol	Staphylococcus SGB6340	-0.109664	0.293559	0.71	0.88	-0.504955	0.174867	0.004	0.04
Total phytosterol	Streptococcus parasanguinis	-1.5129	0.305447	<0.001	<0.001	0.530316	0.188617	0.005	0.05
Total phytosterol	Streptococcus salivarius	-1.25526	0.340096	<0.001	0.01	0.0914314	0.211804	0.67	0.8
Total phytosterol	Streptococcus thermophilus	-0.12819	0.265685	0.63	0.84	-0.135714	0.161957	0.4	0.61
Total phytosterol	Sutterella wadsworthensis	0.177058	0.384324	0.65	0.85	0.167623	0.223074	0.45	0.63
Total phytosterol	Veillonella dispar	-0.26088	0.21997	0.24	0.58	0.241267	0.134408	0.07	0.19
Total phytosterol	Vescimonas SGB15087	-0.167823	0.276639	0.54	0.81	-0.285412	0.163773	0.08	0.21
Total phytosterol	Vescimonas coprocola	0.474835	0.43086	0.27	0.61	0.126937	0.260053	0.63	0.78
Total phytosterol	Victivallis lenta	0.340735	0.226263	0.13	0.45	-0.215451	0.137186	0.12	0.27
Total phytosterol	Waltera intestinalis	0.702537	0.429362	0.1	0.41	-0.362513	0.260158	0.16	0.33
β-Sitosterol	Acidaminococcus intestini	-0.38995	0.254767	0.13	0.47	0.41965	0.146583	0.004	0.04
β-Sitosterol	Adlercreutzia equolifaciens	0.263613	0.324101	0.42	0.76	-0.203992	0.192582	0.29	0.49
β-Sitosterol	Agathobaculum butyriciproducens	0.875927	0.29113	0.003	0.06	-0.0423435	0.178097	0.81	0.91
β-Sitosterol	Akkermansia muciniphila	-0.559813	0.537381	0.3	0.67	-0.030721	0.315458	0.92	0.97
β-Sitosterol	Alistipes communis	0.254692	0.426528	0.55	0.82	0.0294592	0.25054	0.91	0.96
β-Sitosterol	Alistipes dispar	0.044485	0.276898	0.87	0.94	-0.0752392	0.160215	0.64	0.78
β-Sitosterol	Alistipes finegoldii	0.0151888	0.526352	0.98	0.98	-0.144916	0.306897	0.64	0.78
β-Sitosterol	Alistipes ihumii	-0.0497976	0.372536	0.89	0.94	-0.193382	0.217045	0.37	0.58
β-Sitosterol	Alistipes indistinctus	0.131796	0.368171	0.72	0.89	-0.0437731	0.217631	0.84	0.92
β-Sitosterol	Alistipes onderdonkii	0.634306	0.472916	0.18	0.54	-0.23149	0.277058	0.4	0.61
β-Sitosterol	Alistipes putredinis	1.21668	0.446695	0.006	0.08	-0.197874	0.26029	0.45	0.63
β-Sitosterol	Alistipes senegalensis	0.231832	0.282784	0.41	0.76	-0.175969	0.165093	0.29	0.48
β-Sitosterol	Alistipes shahii	0.106728	0.424936	0.8	0.92	-0.00860741	0.246513	0.97	0.98
β-Sitosterol	Alistipes sp AF17 16	0.879702	0.308438	0.004	0.08	-0.497841	0.182442	0.006	0.05
β-Sitosterol	Anaerobutyricum hallii	0.729872	0.408499	0.07	0.35	-0.565397	0.24167	0.02	0.09
β-Sitosterol	Anaerobutyricum soehngenii	-0.182837	0.412222	0.66	0.88	0.214385	0.24313	0.38	0.58
β-Sitosterol	Anaerococcus SGB53821	-0.138	0.176921	0.44	0.77	0.197384	0.10561	0.06	0.18
β-Sitosterol	Anaeromassilibacillus sp An250	0.0349347	0.280139	0.9	0.95	-0.34844	0.166846	0.04	0.14
β-Sitosterol	Anaerostipes hadrus	0.547114	0.25479	0.03	0.24	-0.328368	0.154142	0.03	0.12
β-Sitosterol	Anaerotignum faecicola	0.753009	0.414653	0.07	0.35	0.352096	0.243551	0.15	0.31
β-Sitosterol	Anaerotruncus massiliensis	0.261145	0.313431	0.4	0.76	-0.32103	0.186654	0.09	0.21
β-Sitosterol	Bacteroides caccae	0.381336	0.406791	0.35	0.72	-0.297872	0.239506	0.21	0.39
β-Sitosterol	Bacteroides cellulosilyticus	-0.0586993	0.578549	0.92	0.95	-0.027648	0.330465	0.93	0.97
β-Sitosterol	Bacteroides eggerthii	-0.462296	0.440288	0.29	0.66	0.0599	0.250654	0.81	0.91
β-Sitosterol	Bacteroides faecis	0.367472	0.388927	0.34	0.72	0.333949	0.221484	0.13	0.28
β-Sitosterol	Bacteroides finegoldii	0.0955989	0.350281	0.78	0.92	0.126233	0.198641	0.53	0.7
β-Sitosterol	Bacteroides fragilis	0.298334	0.447	0.5	0.82	0.438874	0.260052	0.09	0.22
β-Sitosterol	Bacteroides intestinalis	0.1159	0.358151	0.75	0.9	-0.369534	0.208376	0.08	0.2
β-Sitosterol	Bacteroides nordii	-0.231604	0.374574	0.54	0.82	-0.171902	0.220571	0.44	0.63
β-Sitosterol	Bacteroides ovatus	0.739941	0.408448	0.07	0.35	-0.175078	0.241557	0.47	0.65
β-Sitosterol	Bacteroides salyersiae	-0.0513574	0.315154	0.87	0.94	-0.153204	0.177648	0.39	0.59
β-Sitosterol	Bacteroides stercoris	0.0844892	0.628779	0.89	0.94	0.412927	0.356293	0.25	0.44
β-Sitosterol	Bacteroides thetaiotaomicron	-0.100538	0.447565	0.82	0.92	0.122715	0.261648	0.64	0.78
β-Sitosterol	Bacteroides uniformis	-0.430047	0.253044	0.09	0.38	0.0894806	0.148404	0.55	0.72
β-Sitosterol	Bacteroides xylanisolvens	-0.746333	0.435796	0.09	0.37	0.493198	0.254987	0.05	0.16
β-Sitosterol	Barnesiella intestinihominis	-0.184942	0.481475	0.7	0.89	-0.688792	0.275623	0.01	0.07
β-Sitosterol	Bifidobacterium adolescentis	-0.530087	0.405652	0.19	0.55	-0.00694131	0.239553	0.98	0.98
β-Sitosterol	Bifidobacterium bifidum	-0.574922	0.237292	0.02	0.15	0.00959087	0.1402	0.95	0.98
β-Sitosterol	Bifidobacterium longum	-0.595505	0.469527	0.2	0.56	-0.353223	0.277905	0.2	0.38
β-Sitosterol	Bifidobacterium pseudocatenulatum	0.275426	0.296809	0.35	0.72	-0.319347	0.175835	0.07	0.19
β-Sitosterol	Bilophila wadsworthia	0.251636	0.413911	0.54	0.82	0.32526	0.24646	0.19	0.36
β-Sitosterol	Blautia SGB4815	-0.0447796	0.290526	0.88	0.94	-0.388128	0.171046	0.02	0.1
β-Sitosterol	Blautia caecimuris	-0.655746	0.381275	0.09	0.37	0.906234	0.226631	<0.001	0.004
β-Sitosterol	Blautia faecis	0.276849	0.21776	0.2	0.56	-0.0345004	0.129016	0.79	0.89
β-Sitosterol	Blautia glucerasea	-0.136809	0.33756	0.69	0.89	-0.380521	0.200578	0.06	0.17
β-Sitosterol	Blautia hydrogenotrophica	-0.490588	0.264883	0.06	0.34	0.353824	0.159702	0.03	0.11
β-Sitosterol	Blautia luti	0.895146	0.284902	0.002	0.04	-0.560024	0.169108	<0.001	0.02
β-Sitosterol	Blautia massiliensis	0.17466	0.338018	0.61	0.86	0.273376	0.2038	0.18	0.35
β-Sitosterol	Blautia obeum	0.122637	0.345469	0.72	0.89	-0.161247	0.207296	0.44	0.63
β-Sitosterol	Blautia producta	-0.405934	0.302392	0.18	0.54	0.453656	0.180342	0.01	0.07
β-Sitosterol	Blautia sp MSK 20 85	0.628412	0.34362	0.07	0.35	-0.320179	0.204768	0.12	0.27
β-Sitosterol	Blautia stercoris	0.0399261	0.275361	0.88	0.94	-0.0297694	0.160653	0.85	0.93
β-Sitosterol	Blautia wexlerae	0.51592	0.184253	0.005	0.08	-0.0056709	0.111606	0.96	0.98
β-Sitosterol	Butyricicoccus sp AM29 23AC	0.268455	0.346755	0.44	0.77	-0.414756	0.20273	0.04	0.14
β-Sitosterol	Butyricimonas SGB15260	-0.126337	0.341246	0.71	0.89	-0.42034	0.195021	0.03	0.12
β-Sitosterol	Butyricimonas faecihominis	0.253239	0.337997	0.45	0.78	0.0905937	0.193288	0.64	0.78
β-Sitosterol	Butyricimonas paravirosa	0.537443	0.326069	0.1	0.4	-0.15531	0.190774	0.42	0.62
β-Sitosterol	Butyricimonas virosa	-0.283953	0.301949	0.35	0.72	0.0227961	0.175626	0.9	0.96
β-Sitosterol	Candidatus Avimonas narfia	-0.0183241	0.327197	0.96	0.97	-0.202304	0.195199	0.3	0.49
β-Sitosterol	Candidatus Borkfalkia ceftriaxoniphila	0.285179	0.345398	0.41	0.76	-0.108512	0.206129	0.6	0.76
β-Sitosterol	Candidatus Cibionibacter quicibialis	1.0923	0.384477	0.004	0.08	-0.696773	0.22868	0.002	0.03
β-Sitosterol	Candidatus Gastranaerophilales bacterium	1.02839	0.323079	0.001	0.04	-0.0727773	0.191266	0.7	0.83
β-Sitosterol	Candidatus Woodwardibium SGB14954	0.468513	0.239405	0.05	0.3	-0.0697189	0.138982	0.62	0.77
β-Sitosterol	Christensenellaceae bacterium NSJ 63	-0.354231	0.237135	0.14	0.48	-0.0336207	0.142844	0.81	0.91
β-Sitosterol	Clostridia bacterium	-0.590591	0.329599	0.07	0.35	0.497703	0.192203	0.01	0.06
β-Sitosterol	Clostridia bacterium UC5 1 1E11	-0.388993	0.267843	0.15	0.49	0.172951	0.162111	0.29	0.48
β-Sitosterol	Clostridiaceae bacterium	0.594493	0.211841	0.005	0.08	0.138328	0.128184	0.28	0.48
β-Sitosterol	Clostridiaceae bacterium AF18 31LB	1.47542	0.384286	<0.001	0.007	-0.21511	0.234433	0.36	0.57
β-Sitosterol	Clostridiaceae bacterium Marseille Q3526	-0.055902	0.255097	0.83	0.92	0.471079	0.153357	0.002	0.03
β-Sitosterol	Clostridiaceae bacterium Marseille Q4143	1.08746	0.379862	0.004	0.08	-0.587139	0.227314	0.01	0.06
β-Sitosterol	Clostridiaceae bacterium Marseille Q4145	0.341639	0.307746	0.27	0.64	-0.18936	0.182627	0.3	0.49
β-Sitosterol	Clostridiaceae bacterium Marseille Q4149	-0.179985	0.386298	0.64	0.88	-0.42423	0.221556	0.06	0.16
β-Sitosterol	Clostridiaceae unclassified SGB15090	-0.0167149	0.335957	0.96	0.97	-0.013139	0.195808	0.95	0.98
β-Sitosterol	Clostridiaceae unclassified SGB4747	-0.228987	0.274881	0.4	0.76	0.450823	0.160857	0.005	0.05
β-Sitosterol	Clostridiaceae unclassified SGB4771	0.553309	0.222229	0.01	0.14	0.0218317	0.132416	0.87	0.94
β-Sitosterol	Clostridiales Family XIII bacterium BX16	-0.318241	0.329211	0.33	0.71	0.0897493	0.196686	0.65	0.79
β-Sitosterol	Clostridiales bacterium	0.336316	0.278472	0.23	0.58	0.643574	0.164193	<0.001	0.004
β-Sitosterol	Clostridiales bacterium Choco116	0.200412	0.319764	0.53	0.82	0.380953	0.188422	0.04	0.14
β-Sitosterol	Clostridiales bacterium KLE1615	0.329529	0.295056	0.26	0.64	0.0251658	0.175879	0.89	0.95
β-Sitosterol	Clostridium SGB4648	0.15416	0.359867	0.67	0.88	-0.597269	0.210121	0.004	0.04
β-Sitosterol	Clostridium SGB4750	0.200258	0.342671	0.56	0.82	0.185109	0.20424	0.36	0.57
β-Sitosterol	Clostridium butyricum	-0.243219	0.229827	0.29	0.66	0.199887	0.139588	0.15	0.31
β-Sitosterol	Clostridium fessum	0.820319	0.396608	0.04	0.26	-0.260537	0.234208	0.27	0.47
β-Sitosterol	Clostridium leptum	-1.07907	0.312598	<0.001	0.02	0.0396227	0.193169	0.84	0.92
β-Sitosterol	Clostridium scindens	-0.233363	0.28636	0.42	0.76	0.475515	0.171191	0.005	0.05
β-Sitosterol	Clostridium sp 1001270H 150608 G6	0.310164	0.44744	0.49	0.82	-0.538187	0.264122	0.04	0.14
β-Sitosterol	Clostridium sp AF20 17LB	0.692738	0.32878	0.04	0.25	-0.542942	0.19916	0.006	0.05
β-Sitosterol	Clostridium sp AF27 2AA	0.51654	0.323769	0.11	0.43	-0.236748	0.194241	0.22	0.4
β-Sitosterol	Clostridium sp AF34 10BH	0.768752	0.381416	0.04	0.29	-0.21129	0.227042	0.35	0.56
β-Sitosterol	Clostridium sp AF34 13	0.817079	0.359236	0.02	0.2	-0.153318	0.214918	0.48	0.66
β-Sitosterol	Clostridium sp AF36 4	-0.113799	0.46264	0.81	0.92	-0.385605	0.275327	0.16	0.33
β-Sitosterol	Clostridium sp AM22 11AC	1.21381	0.440663	0.006	0.08	-0.0719004	0.26277	0.78	0.89
β-Sitosterol	Clostridium sp AM33 3	1.37036	0.351582	<0.001	0.007	-0.399793	0.212358	0.06	0.17
β-Sitosterol	Clostridium sp AM49 4BH	0.165945	0.435058	0.7	0.89	-0.0994822	0.258512	0.7	0.83
β-Sitosterol	Clostridium sp AT4	0.0818993	0.338838	0.81	0.92	0.72205	0.203453	<0.001	0.01
β-Sitosterol	Clostridium spiroforme	-0.020365	0.251684	0.94	0.96	0.0123653	0.150307	0.93	0.97
β-Sitosterol	Clostridium symbiosum	-0.861302	0.274347	0.002	0.04	0.576609	0.166192	<0.001	0.01
β-Sitosterol	Collinsella SGB14861	-0.802206	0.426161	0.06	0.32	0.068342	0.254191	0.79	0.89
β-Sitosterol	Collinsella SGB4121	-0.038453	0.269064	0.89	0.94	-0.0592269	0.159023	0.71	0.84
β-Sitosterol	Collinsella aerofaciens	-0.153921	0.264348	0.56	0.82	-0.00959508	0.158284	0.95	0.98
β-Sitosterol	Coprobacter fastidiosus	0.192475	0.294877	0.51	0.82	0.0681044	0.172145	0.69	0.82
β-Sitosterol	Coprococcus SGB4669	0.421738	0.304335	0.17	0.52	-0.343956	0.177835	0.05	0.16
β-Sitosterol	Coprococcus catus	0.408529	0.402408	0.31	0.68	-0.55204	0.237346	0.02	0.09
β-Sitosterol	Coprococcus comes	0.501798	0.387333	0.2	0.55	-0.117234	0.227574	0.61	0.76
β-Sitosterol	Coprococcus eutactus	0.282821	0.427195	0.51	0.82	-0.578295	0.249055	0.02	0.09
β-Sitosterol	Desulfovibrio SGB5077	0.0773993	0.352097	0.83	0.92	-0.201773	0.208224	0.33	0.54
β-Sitosterol	Dialister invisus	-0.299789	0.517868	0.56	0.82	-0.0382749	0.302804	0.9	0.96
β-Sitosterol	Dorea formicigenerans	0.388562	0.269185	0.15	0.49	0.146581	0.16265	0.37	0.57
β-Sitosterol	Dorea longicatena	0.0100699	0.323907	0.98	0.98	-0.157148	0.192425	0.41	0.62
β-Sitosterol	Dorea sp AF24 7LB	0.252037	0.303836	0.41	0.76	-0.163475	0.177664	0.36	0.57
β-Sitosterol	Dorea sp AF36 15AT	0.375684	0.30765	0.22	0.58	-0.12596	0.184795	0.5	0.67
β-Sitosterol	Dysosmobacter sp BX15	0.609666	0.465489	0.19	0.55	-0.567891	0.275045	0.04	0.14
β-Sitosterol	Dysosmobacter sp NSJ 60	0.260462	0.286124	0.36	0.72	0.451549	0.170336	0.008	0.06
β-Sitosterol	Dysosmobacter welbionis	0.564277	0.252638	0.03	0.21	0.43588	0.153433	0.004	0.04
β-Sitosterol	Eggerthella lenta	-0.340396	0.372036	0.36	0.72	0.396351	0.219784	0.07	0.19
β-Sitosterol	Eisenbergiella massiliensis	-0.123446	0.336182	0.71	0.89	-0.063878	0.200211	0.75	0.86
β-Sitosterol	Eisenbergiella tayi	-0.210246	0.263129	0.42	0.77	0.0211336	0.158543	0.89	0.96
β-Sitosterol	Enterocloster SGB14313	-0.326727	0.319823	0.31	0.68	-0.0672237	0.186146	0.72	0.84
β-Sitosterol	Enterocloster aldenensis	-0.499303	0.234531	0.03	0.24	0.514862	0.141349	<0.001	0.008
β-Sitosterol	Enterocloster bolteae	-0.271896	0.351543	0.44	0.77	0.870207	0.210129	<0.001	0.002
β-Sitosterol	Enterocloster citroniae	-0.00477509	0.233103	0.98	0.98	0.463072	0.139401	<0.001	0.02
β-Sitosterol	Enterocloster lavalensis	-0.355503	0.266406	0.18	0.54	0.507809	0.159871	0.001	0.03
β-Sitosterol	Erysipelatoclostridium ramosum	0.0365438	0.323872	0.91	0.95	0.460172	0.195001	0.02	0.09
β-Sitosterol	Escherichia coli	0.0466073	0.353799	0.9	0.94	0.658707	0.210368	0.002	0.03
β-Sitosterol	Eubacteriaceae bacterium	0.355641	0.363219	0.33	0.7	-0.345563	0.21496	0.11	0.25
β-Sitosterol	Eubacteriales unclassified SGB15145	0.680383	0.26628	0.01	0.13	-0.388932	0.16102	0.02	0.08
β-Sitosterol	Eubacterium SGB4671	-0.294789	0.212177	0.16	0.52	-0.0725934	0.123615	0.56	0.73
β-Sitosterol	Eubacterium SGB6276	0.403414	0.394069	0.31	0.68	-0.86609	0.229566	<0.001	0.007
β-Sitosterol	Eubacterium ramulus	0.129911	0.386622	0.74	0.89	-0.133674	0.228931	0.56	0.73
β-Sitosterol	Eubacterium rectale	0.601816	0.349486	0.09	0.37	0.0224387	0.211118	0.92	0.97
β-Sitosterol	Eubacterium siraeum	-0.656646	0.536595	0.22	0.58	-0.636973	0.316057	0.04	0.14
β-Sitosterol	Eubacterium sp AF16 48	-0.193529	0.304596	0.53	0.82	-0.271437	0.179972	0.13	0.28
β-Sitosterol	Eubacterium ventriosum	0.21585	0.355005	0.54	0.82	-0.111268	0.207415	0.59	0.75
β-Sitosterol	Evtepia gabavorous	-0.0171305	0.37289	0.96	0.97	0.679469	0.219429	0.002	0.03
β-Sitosterol	Faecalibacillus faecis	-0.155705	0.30283	0.61	0.86	0.18616	0.17715	0.29	0.49
β-Sitosterol	Faecalibacillus intestinalis	1.20158	0.382534	0.002	0.04	-0.628344	0.224986	0.005	0.05
β-Sitosterol	Faecalibacterium SGB15315	0.829674	0.429239	0.05	0.3	-0.240775	0.25339	0.34	0.55
β-Sitosterol	Faecalibacterium SGB15346	0.531215	0.398672	0.18	0.54	-0.688436	0.232587	0.003	0.04
β-Sitosterol	Faecalibacterium prausnitzii	0.392111	0.180642	0.03	0.23	-0.29431	0.109267	0.007	0.06
β-Sitosterol	Faecalicatena fissicatena	0.620021	0.421897	0.14	0.49	-0.623645	0.246638	0.01	0.07
β-Sitosterol	Firmicutes bacterium AF16 15	0.899917	0.374743	0.02	0.15	-0.340062	0.22441	0.13	0.28
β-Sitosterol	Flavonifractor plautii	0.109505	0.384237	0.78	0.92	1.07839	0.226866	<0.001	<0.001
β-Sitosterol	Fusicatenibacter saccharivorans	0.51063	0.235914	0.03	0.23	0.0769573	0.142479	0.59	0.75
β-Sitosterol	GGB13404 SGB14252	0.472275	0.275678	0.09	0.37	-0.355231	0.165633	0.03	0.12
β-Sitosterol	GGB16040 SGB9347	0.128942	0.347957	0.71	0.89	-0.409986	0.205384	0.05	0.15
β-Sitosterol	GGB2653 SGB3574	-0.396127	0.308796	0.2	0.55	0.158285	0.185884	0.39	0.6
β-Sitosterol	GGB2970 SGB3952	0.243872	0.231345	0.29	0.66	-0.232217	0.137668	0.09	0.22
β-Sitosterol	GGB2980 SGB3962	-0.0164392	0.218236	0.94	0.96	-0.072017	0.129659	0.58	0.74
β-Sitosterol	GGB2982 SGB3964	0.369373	0.30906	0.23	0.59	-0.0897139	0.183269	0.62	0.78
β-Sitosterol	GGB2998 SGB3988	-0.0565683	0.272867	0.84	0.93	-0.0098048	0.161893	0.95	0.98
β-Sitosterol	GGB3005 SGB3996	0.14349	0.38142	0.71	0.89	0.102264	0.227939	0.65	0.79
β-Sitosterol	GGB3109 SGB4643	-0.213916	0.364112	0.56	0.82	-0.78095	0.212101	<0.001	0.008
β-Sitosterol	GGB3167 SGB4181	0.137378	0.283676	0.63	0.88	-0.367379	0.166964	0.03	0.11
β-Sitosterol	GGB3175 SGB4191	0.171139	0.340249	0.61	0.87	-0.42638	0.199517	0.03	0.12
β-Sitosterol	GGB3256 SGB4303	0.279296	0.425513	0.51	0.82	-0.477408	0.247186	0.05	0.16
β-Sitosterol	GGB3277 SGB4327	-0.0601456	0.180369	0.74	0.89	-0.132366	0.108274	0.22	0.4
β-Sitosterol	GGB3278 SGB4328	-0.0560253	0.251209	0.82	0.92	-0.130985	0.146746	0.37	0.58
β-Sitosterol	GGB32900 SGB53446	0.324978	0.295289	0.27	0.65	-0.116809	0.178622	0.51	0.69
β-Sitosterol	GGB3304 SGB4367	-0.221618	0.381847	0.56	0.82	-0.402144	0.222363	0.07	0.19
β-Sitosterol	GGB3321 SGB4394	0.497619	0.256788	0.05	0.3	-0.373979	0.150904	0.01	0.07
β-Sitosterol	GGB33469 SGB15236	0.275216	0.389927	0.48	0.81	-0.52252	0.225958	0.02	0.09
β-Sitosterol	GGB33512 SGB15201	-0.133834	0.3066	0.66	0.88	-0.191364	0.183486	0.3	0.49
β-Sitosterol	GGB33512 SGB15203	0.0683733	0.308919	0.82	0.92	-0.348211	0.181311	0.05	0.16
β-Sitosterol	GGB33586 SGB53517	0.403324	0.284491	0.16	0.5	0.0564847	0.173304	0.74	0.86
β-Sitosterol	GGB33928 SGB15225	-0.362725	0.3005	0.23	0.58	-0.132114	0.178843	0.46	0.64
β-Sitosterol	GGB3475 SGB4638	-0.199326	0.260881	0.44	0.77	-0.396883	0.153181	0.01	0.06
β-Sitosterol	GGB34797 SGB14322	0.446428	0.248766	0.07	0.35	-0.0935999	0.144215	0.52	0.69
β-Sitosterol	GGB3486 SGB4658	0.0823805	0.222172	0.71	0.89	-0.333442	0.130548	0.01	0.07
β-Sitosterol	GGB3510 SGB4687	0.327183	0.253234	0.2	0.55	-0.308355	0.150911	0.04	0.14
β-Sitosterol	GGB3537 SGB4727	0.313271	0.23698	0.19	0.54	0.00478599	0.14347	0.97	0.98
β-Sitosterol	GGB3548 SGB4744	0.350794	0.231177	0.13	0.47	0.221892	0.135418	0.1	0.24
β-Sitosterol	GGB3570 SGB4777	0.405632	0.259263	0.12	0.45	-0.459809	0.153789	0.003	0.04
β-Sitosterol	GGB3602 SGB4574	-0.419877	0.323886	0.19	0.55	0.600912	0.189035	0.001	0.03
β-Sitosterol	GGB3612 SGB4882	-0.107184	0.372417	0.77	0.92	-0.391476	0.222071	0.08	0.2
β-Sitosterol	GGB3614 SGB4886	-0.61217	0.343543	0.07	0.35	-0.397895	0.199757	0.05	0.15
β-Sitosterol	GGB3619 SGB4894	0.468354	0.309853	0.13	0.47	-0.276449	0.179764	0.12	0.28
β-Sitosterol	GGB36267 SGB14177	-0.439465	0.282051	0.12	0.45	-0.220242	0.170158	0.2	0.37
β-Sitosterol	GGB3653 SGB4964	0.682201	0.340355	0.05	0.29	-0.748104	0.201137	<0.001	0.008
β-Sitosterol	GGB3746 SGB5089	0.706817	0.408127	0.08	0.37	-0.403753	0.242871	0.1	0.23
β-Sitosterol	GGB3819 SGB5184	0.298756	0.299998	0.32	0.69	0.83518	0.176763	<0.001	<0.001
β-Sitosterol	GGB38744 SGB14842	-0.239179	0.261275	0.36	0.72	0.125117	0.159857	0.43	0.63
β-Sitosterol	GGB42994 SGB4746	0.129896	0.334431	0.7	0.89	0.607021	0.197505	0.002	0.03
β-Sitosterol	GGB45432 SGB63101	-0.0975221	0.207719	0.64	0.88	-0.0597902	0.12491	0.63	0.78
β-Sitosterol	GGB4566 SGB6305	0.582189	0.295185	0.05	0.3	-0.35029	0.173776	0.04	0.14
β-Sitosterol	GGB4567 SGB6308	0.136873	0.246657	0.58	0.84	-0.242527	0.143284	0.09	0.22
β-Sitosterol	GGB4571 SGB6317	0.401831	0.218098	0.07	0.34	-0.164401	0.128411	0.2	0.38
β-Sitosterol	GGB4745 SGB6571	-0.35558	0.308648	0.25	0.61	-0.310476	0.178748	0.08	0.21
β-Sitosterol	GGB47687 SGB2286	-0.150043	0.327423	0.65	0.88	-0.345608	0.191094	0.07	0.19
β-Sitosterol	GGB4802 SGB6641	0.18833	0.236095	0.43	0.77	0.0630554	0.141926	0.66	0.8
β-Sitosterol	GGB51139 SGB71360	-0.33924	0.199953	0.09	0.38	0.181452	0.120285	0.13	0.28
β-Sitosterol	GGB51269 SGB5062	0.0768454	0.268311	0.77	0.92	-0.216449	0.159703	0.18	0.35
β-Sitosterol	GGB51647 SGB4348	-0.240022	0.338434	0.48	0.81	-0.293968	0.197878	0.14	0.29
β-Sitosterol	GGB52130 SGB14966	0.770308	0.26956	0.004	0.08	-0.0942702	0.163792	0.56	0.73
β-Sitosterol	GGB5980 SGB8599	0.541635	0.254023	0.03	0.24	-0.00396652	0.149584	0.98	0.98
β-Sitosterol	GGB6612 SGB9346	0.194054	0.292056	0.51	0.82	0.207324	0.169022	0.22	0.4
β-Sitosterol	GGB79630 SGB13983	0.280853	0.302446	0.35	0.72	-0.265169	0.180049	0.14	0.3
β-Sitosterol	GGB79734 SGB15291	1.17395	0.377605	0.002	0.05	-0.585146	0.222009	0.008	0.06
β-Sitosterol	GGB79890 SGB14770	0.3711	0.342747	0.28	0.65	-0.149968	0.198054	0.45	0.63
β-Sitosterol	GGB79973 SGB14341	-0.0629166	0.354275	0.86	0.94	-0.0113071	0.206885	0.96	0.98
β-Sitosterol	GGB79998 SGB48024	0.353788	0.301774	0.24	0.6	-0.269089	0.185805	0.15	0.31
β-Sitosterol	GGB80011 SGB15265	0.267984	0.367725	0.47	0.79	-0.147284	0.213653	0.49	0.67
β-Sitosterol	GGB80011 SGB15267	0.214202	0.236953	0.37	0.72	-0.0318048	0.137679	0.82	0.91
β-Sitosterol	GGB80140 SGB15224	-0.126137	0.320169	0.69	0.89	-0.333022	0.185222	0.07	0.19
β-Sitosterol	GGB9062 SGB13981	0.103149	0.2667	0.7	0.89	-0.349002	0.159198	0.03	0.11
β-Sitosterol	GGB9063 SGB13982	-0.222117	0.328389	0.5	0.82	-0.249642	0.195193	0.2	0.38
β-Sitosterol	GGB9109 SGB14042	-0.0709531	0.261655	0.79	0.92	-0.392619	0.152981	0.01	0.07
β-Sitosterol	GGB9115 SGB14048	0.225957	0.25081	0.37	0.72	-0.179122	0.148729	0.23	0.41
β-Sitosterol	GGB9176 SGB14114	-0.179839	0.380149	0.64	0.88	-0.402798	0.2208	0.07	0.19
β-Sitosterol	GGB9210 SGB14149	0.0477586	0.212981	0.82	0.92	-0.151217	0.125712	0.23	0.41
β-Sitosterol	GGB9211 SGB14151	0.0349362	0.207141	0.87	0.94	-0.133293	0.119988	0.27	0.47
β-Sitosterol	GGB9237 SGB14179	0.323809	0.24041	0.18	0.54	-0.228747	0.143325	0.11	0.26
β-Sitosterol	GGB9240 SGB14182	0.0671247	0.241195	0.78	0.92	-0.0908468	0.14205	0.52	0.7
β-Sitosterol	GGB9296 SGB14253	-0.311194	0.271384	0.25	0.61	-0.397135	0.159955	0.01	0.07
β-Sitosterol	GGB9342 SGB14306	-0.758604	0.431571	0.08	0.37	-0.568436	0.252911	0.02	0.1
β-Sitosterol	GGB9345 SGB14311	-0.703744	0.372915	0.06	0.32	-0.439752	0.216936	0.04	0.14
β-Sitosterol	GGB9350 SGB14317	-0.263985	0.310056	0.39	0.76	-0.357375	0.179845	0.05	0.15
β-Sitosterol	GGB9453 SGB14844	0.0704102	0.297788	0.81	0.92	-0.431948	0.175702	0.01	0.08
β-Sitosterol	GGB9480 SGB14874	0.348036	0.386968	0.37	0.72	0.329529	0.23019	0.15	0.31
β-Sitosterol	GGB9495 SGB14892	-0.194886	0.306779	0.53	0.82	-0.436425	0.18112	0.02	0.08
β-Sitosterol	GGB9512 SGB14909	-0.511823	0.42957	0.23	0.59	0.4611	0.253242	0.07	0.19
β-Sitosterol	GGB9522 SGB14921	0.207118	0.165232	0.21	0.57	-0.0746462	0.0990677	0.45	0.63
β-Sitosterol	GGB9524 SGB14923	-0.630339	0.266884	0.02	0.16	0.338472	0.157219	0.03	0.12
β-Sitosterol	GGB9524 SGB14924	1.51337	0.357203	<0.001	0.004	-0.491871	0.211906	0.02	0.09
β-Sitosterol	GGB9531 SGB14932	0.296904	0.298592	0.32	0.69	-0.195923	0.178959	0.27	0.47
β-Sitosterol	GGB9534 SGB14937	0.101738	0.318688	0.75	0.9	-0.0114831	0.191186	0.95	0.98
β-Sitosterol	GGB9551 SGB14958	-0.126017	0.20062	0.53	0.82	-0.195171	0.117562	0.1	0.23
β-Sitosterol	GGB9602 SGB15028	-0.276565	0.27032	0.31	0.68	-0.0201488	0.159248	0.9	0.96
β-Sitosterol	GGB9602 SGB15031	-0.132193	0.423689	0.76	0.9	-0.560771	0.245877	0.02	0.1
β-Sitosterol	GGB9614 SGB15049	0.264841	0.315534	0.4	0.76	-0.245096	0.191542	0.2	0.38
β-Sitosterol	GGB9619 SGB15066	0.708751	0.289081	0.01	0.15	-0.0397119	0.172527	0.82	0.91
β-Sitosterol	GGB9619 SGB15067	0.489157	0.299815	0.1	0.4	-0.138951	0.178588	0.44	0.63
β-Sitosterol	GGB9621 SGB15073	0.705493	0.285146	0.01	0.14	-0.0608674	0.171484	0.72	0.84
β-Sitosterol	GGB9627 SGB15081	0.0988607	0.292125	0.74	0.89	0.11321	0.172193	0.51	0.69
β-Sitosterol	GGB9634 SGB15093	-0.0375901	0.334678	0.91	0.95	-0.185888	0.193469	0.34	0.54
β-Sitosterol	GGB9635 SGB15106	0.159684	0.367096	0.66	0.88	-0.569562	0.21143	0.007	0.06
β-Sitosterol	GGB9677 SGB15180	-0.010286	0.310396	0.97	0.98	-0.478158	0.180391	0.008	0.06
β-Sitosterol	GGB9699 SGB15216	0.955046	0.382559	0.01	0.14	-0.0975396	0.228942	0.67	0.81
β-Sitosterol	GGB9707 SGB15229	-0.36398	0.344091	0.29	0.66	-0.387378	0.203977	0.06	0.17
β-Sitosterol	GGB9708 SGB15233	-0.351231	0.320881	0.27	0.65	-0.443743	0.185418	0.02	0.08
β-Sitosterol	GGB9708 SGB15234	-0.514956	0.472656	0.28	0.65	-0.611959	0.274695	0.03	0.11
β-Sitosterol	GGB9712 SGB15244	-0.426611	0.352872	0.23	0.58	-0.839801	0.203484	<0.001	0.002
β-Sitosterol	GGB9713 SGB15249	0.284313	0.462045	0.54	0.82	-0.70693	0.268643	0.009	0.06
β-Sitosterol	GGB9719 SGB15273	-0.107021	0.247065	0.66	0.88	0.052018	0.14798	0.73	0.84
β-Sitosterol	GGB9747 SGB15356	-0.297541	0.376822	0.43	0.77	-0.442699	0.218052	0.04	0.14
β-Sitosterol	GGB9758 SGB15368	0.751508	0.387389	0.05	0.3	-0.669966	0.222006	0.003	0.03
β-Sitosterol	GGB9759 SGB15370	0.371408	0.344602	0.28	0.65	0.217452	0.201298	0.28	0.48
β-Sitosterol	GGB9760 SGB15373	0.680597	0.393335	0.08	0.37	-0.534726	0.228339	0.02	0.09
β-Sitosterol	GGB9760 SGB15374	-0.486445	0.338632	0.15	0.49	-0.133951	0.194283	0.49	0.67
β-Sitosterol	GGB9765 SGB15382	0.232365	0.291902	0.43	0.77	-0.189703	0.171671	0.27	0.47
β-Sitosterol	GGB9770 SGB15390	0.179614	0.379818	0.64	0.88	-0.300604	0.224909	0.18	0.36
β-Sitosterol	GGB9775 SGB15395	0.551484	0.333285	0.1	0.4	-0.399985	0.197396	0.04	0.14
β-Sitosterol	GGB9781 SGB66170	0.0410373	0.243372	0.87	0.94	-0.24914	0.145616	0.09	0.22
β-Sitosterol	GGB9782 SGB15403	-0.233096	0.233871	0.32	0.69	-0.315302	0.136725	0.02	0.09
β-Sitosterol	GGB9818 SGB15459	0.0877037	0.254356	0.73	0.89	-0.0455117	0.152146	0.76	0.88
β-Sitosterol	Gemmiger SGB15295	0.502317	0.378432	0.18	0.54	-0.0538436	0.218785	0.81	0.91
β-Sitosterol	Gemmiger SGB15299	0.561409	0.3706	0.13	0.47	-0.296533	0.216089	0.17	0.34
β-Sitosterol	Gemmiger formicilis	0.212125	0.473081	0.65	0.88	-0.465437	0.280144	0.1	0.23
β-Sitosterol	Gordonibacter pamelaeae	-0.385141	0.261639	0.14	0.49	0.191322	0.155901	0.22	0.4
β-Sitosterol	Gordonibacter urolithinfaciens	-0.140646	0.218215	0.52	0.82	-0.0107971	0.129571	0.93	0.97
β-Sitosterol	Haemophilus parainfluenzae	-0.432926	0.222279	0.05	0.3	0.08015	0.136983	0.56	0.73
β-Sitosterol	Holdemanella porci	0.045038	0.266236	0.87	0.94	0.15944	0.152654	0.3	0.49
β-Sitosterol	Holdemania filiformis	0.0700906	0.270962	0.8	0.92	0.287168	0.16052	0.07	0.19
β-Sitosterol	Hungatella hathewayi	-0.423455	0.255029	0.1	0.4	0.23573	0.156197	0.13	0.28
β-Sitosterol	Hydrogenoanaerobacterium saccharovorans	0.155848	0.313601	0.62	0.87	0.00239789	0.186248	0.99	0.99
β-Sitosterol	Intestinimonas butyriciproducens	1.02022	0.350461	0.004	0.08	0.366676	0.210933	0.08	0.21
β-Sitosterol	Intestinimonas massiliensis	-0.0302304	0.319314	0.92	0.95	-0.185032	0.190579	0.33	0.54
β-Sitosterol	Lachnospira eligens	0.325118	0.452839	0.47	0.8	-0.232296	0.26754	0.39	0.59
β-Sitosterol	Lachnospira pectinoschiza	-0.0476208	0.438998	0.91	0.95	0.0568538	0.25961	0.83	0.91
β-Sitosterol	Lachnospira sp NSJ 43	0.723656	0.444505	0.1	0.4	-0.748185	0.261041	0.004	0.04
β-Sitosterol	Lachnospiraceae bacterium	0.223368	0.366456	0.54	0.82	-0.339737	0.219672	0.12	0.27
β-Sitosterol	Lachnospiraceae bacterium AM48 27BH	0.871863	0.348588	0.01	0.14	-0.535549	0.206184	0.009	0.06
β-Sitosterol	Lachnospiraceae bacterium BX3	0.257957	0.209295	0.22	0.58	-0.379211	0.126185	0.003	0.03
β-Sitosterol	Lachnospiraceae bacterium Marseille Q4251	0.690436	0.31548	0.03	0.23	-0.497639	0.186791	0.008	0.06
β-Sitosterol	Lachnospiraceae bacterium OM04 12BH	0.016329	0.305767	0.96	0.97	-0.414754	0.179182	0.02	0.09
β-Sitosterol	Lacrimispora amygdalina	0.0811641	0.387684	0.83	0.93	-0.0508918	0.232568	0.83	0.91
β-Sitosterol	Lacrimispora celerecrescens	-0.188971	0.399475	0.64	0.88	-0.31921	0.238053	0.18	0.35
β-Sitosterol	Lawsonibacter asaccharolyticus	1.00643	0.263628	<0.001	0.007	0.108624	0.162387	0.5	0.68
β-Sitosterol	Lawsonibacter sp NSJ 51	0.366945	0.311481	0.24	0.6	-0.164218	0.18666	0.38	0.58
β-Sitosterol	Longicatena caecimuris	-0.577344	0.276817	0.04	0.26	0.254109	0.164371	0.12	0.27
β-Sitosterol	Massilistercora timonensis	-0.110757	0.244932	0.65	0.88	-0.19134	0.144517	0.19	0.36
β-Sitosterol	Mediterraneibacter butyricigenes	0.10135	0.292498	0.73	0.89	-0.103734	0.174304	0.55	0.72
β-Sitosterol	Mediterraneibacter glycyrrhizinilyticus	-0.231105	0.293096	0.43	0.77	1.00539	0.173114	<0.001	<0.001
β-Sitosterol	Methanobrevibacter smithii	-0.326117	0.382468	0.39	0.76	-0.718327	0.22171	0.001	0.03
β-Sitosterol	Methylobacterium SGB15164	1.00731	0.362458	0.005	0.08	0.0431757	0.218022	0.84	0.92
β-Sitosterol	Monoglobus pectinilyticus	0.361257	0.473201	0.45	0.77	0.296999	0.277732	0.28	0.48
β-Sitosterol	Negativibacillus massiliensis	-0.055346	0.357246	0.88	0.94	-0.405605	0.207955	0.05	0.16
β-Sitosterol	Neglectibacter timonensis	-1.27873	0.337665	<0.001	0.007	-0.11487	0.206218	0.58	0.74
β-Sitosterol	Nitrosopumilus SGB14899	-0.0545734	0.331509	0.87	0.94	0.0330228	0.198136	0.87	0.94
β-Sitosterol	Odoribacter splanchnicus	0.223788	0.328486	0.5	0.82	0.00843979	0.193152	0.97	0.98
β-Sitosterol	Oscillibacter sp ER4	0.708327	0.464589	0.13	0.47	-0.845921	0.270148	0.002	0.03
β-Sitosterol	Oscillospiraceae bacterium	-0.254371	0.337826	0.45	0.78	0.151115	0.197922	0.45	0.63
β-Sitosterol	Oscillospiraceae bacterium BX1	0.0795353	0.196927	0.69	0.89	-0.282849	0.116093	0.01	0.08
β-Sitosterol	Oscillospiraceae bacterium Marseille Q3528	0.593429	0.30211	0.05	0.3	-0.361875	0.179627	0.04	0.14
β-Sitosterol	Parabacteroides distasonis	-0.246843	0.362954	0.5	0.82	0.134328	0.211526	0.53	0.7
β-Sitosterol	Parabacteroides goldsteinii	0.738831	0.355451	0.04	0.26	-0.382605	0.207569	0.07	0.18
β-Sitosterol	Parabacteroides johnsonii	0.399659	0.289547	0.17	0.52	0.133415	0.166399	0.42	0.62
β-Sitosterol	Parabacteroides merdae	-0.663522	0.448285	0.14	0.49	0.140518	0.258451	0.59	0.75
β-Sitosterol	Paraprevotella clara	-0.14486	0.402443	0.72	0.89	0.187406	0.229402	0.41	0.62
β-Sitosterol	Parasutterella SGB9260	-0.0866906	0.325886	0.79	0.92	0.325581	0.184506	0.08	0.2
β-Sitosterol	Parasutterella excrementihominis	-0.401252	0.428006	0.35	0.72	-0.492806	0.249724	0.05	0.15
β-Sitosterol	Phascolarctobacterium SGB4573	-0.220359	0.330506	0.5	0.82	0.252924	0.196277	0.2	0.38
β-Sitosterol	Phascolarctobacterium faecium	1.92036	0.5064	<0.001	0.007	0.379736	0.299179	0.2	0.38
β-Sitosterol	Phocaeicola SGB6473	-0.139474	0.240293	0.56	0.82	-0.319539	0.139695	0.02	0.1
β-Sitosterol	Phocaeicola dorei	0.168389	0.636116	0.79	0.92	0.472577	0.362851	0.19	0.37
β-Sitosterol	Phocaeicola massiliensis	-0.218251	0.426247	0.61	0.86	0.0968795	0.242169	0.69	0.82
β-Sitosterol	Phocaeicola vulgatus	-0.552919	0.399294	0.17	0.52	-0.0972301	0.231125	0.67	0.81
β-Sitosterol	Prevotella copri clade A	0.276631	0.408148	0.5	0.82	-0.0835166	0.238417	0.73	0.84
β-Sitosterol	Pseudoruminococcus massiliensis	-0.0829975	0.245001	0.73	0.89	-0.230138	0.145259	0.11	0.26
β-Sitosterol	Rheinheimera SGB14999	-0.0963064	0.27482	0.73	0.89	0.1563	0.164598	0.34	0.55
β-Sitosterol	Rikenellaceae bacterium	0.0571627	0.281833	0.84	0.93	0.324781	0.160993	0.04	0.14
β-Sitosterol	Romboutsia timonensis	-0.0566887	0.244085	0.82	0.92	-0.370124	0.144445	0.01	0.07
β-Sitosterol	Roseburia faecis	0.258402	0.44548	0.56	0.82	-0.206866	0.264624	0.43	0.63
β-Sitosterol	Roseburia hominis	0.924504	0.337177	0.006	0.08	-0.138625	0.202644	0.49	0.67
β-Sitosterol	Roseburia intestinalis	0.190646	0.425122	0.65	0.88	0.192211	0.252305	0.45	0.63
β-Sitosterol	Roseburia inulinivorans	0.947813	0.394997	0.02	0.15	0.473622	0.23452	0.04	0.14
β-Sitosterol	Roseburia sp AF02 12	0.296547	0.469534	0.53	0.82	-0.574721	0.278998	0.04	0.14
β-Sitosterol	Roseburia sp AM16 25	0.781576	0.300096	0.009	0.12	-0.278034	0.181719	0.13	0.28
β-Sitosterol	Ruminococcaceae bacterium D5	-0.263657	0.182794	0.15	0.49	-0.0107897	0.11041	0.92	0.97
β-Sitosterol	Ruminococcus SGB4421	0.291505	0.311993	0.35	0.72	-0.258775	0.181842	0.15	0.32
β-Sitosterol	Ruminococcus bicirculans	1.05919	0.470509	0.02	0.21	-0.794582	0.276045	0.004	0.04
β-Sitosterol	Ruminococcus bromii	0.488914	0.550757	0.37	0.73	-0.702622	0.323601	0.03	0.12
β-Sitosterol	Ruminococcus callidus	0.500131	0.296065	0.09	0.38	-0.19231	0.174123	0.27	0.47
β-Sitosterol	Ruminococcus gnavus	-0.533742	0.433699	0.22	0.58	0.676434	0.259764	0.009	0.06
β-Sitosterol	Ruminococcus lactaris	1.1065	0.465475	0.02	0.16	-0.425044	0.278561	0.13	0.28
β-Sitosterol	Ruminococcus sp BSD2780120874 150323 B10	0.0719782	0.361568	0.84	0.93	-0.0781346	0.212489	0.71	0.84
β-Sitosterol	Ruminococcus torques	0.155068	0.245202	0.53	0.82	0.116272	0.14966	0.44	0.63
β-Sitosterol	Ruthenibacterium lactatiformans	-0.504048	0.259566	0.05	0.3	0.374389	0.156365	0.02	0.08
β-Sitosterol	Sanguibacter SGB15121	-0.186121	0.229017	0.42	0.76	-0.329848	0.134551	0.01	0.08
β-Sitosterol	Sellimonas intestinalis	-0.13436	0.22814	0.56	0.82	-0.0242036	0.136757	0.86	0.93
β-Sitosterol	Staphylococcus SGB6340	-0.116808	0.299845	0.7	0.89	-0.504955	0.174867	0.004	0.04
β-Sitosterol	Streptococcus parasanguinis	-1.43748	0.312581	<0.001	0.001	0.530316	0.188617	0.005	0.05
β-Sitosterol	Streptococcus salivarius	-1.2984	0.346221	<0.001	0.007	0.0914314	0.211804	0.67	0.8
β-Sitosterol	Streptococcus thermophilus	-0.0264658	0.271205	0.92	0.95	-0.135714	0.161957	0.4	0.61
β-Sitosterol	Sutterella wadsworthensis	0.105245	0.392285	0.79	0.92	0.167623	0.223074	0.45	0.63
β-Sitosterol	Veillonella dispar	-0.107489	0.224611	0.63	0.88	0.241267	0.134408	0.07	0.19
β-Sitosterol	Vescimonas SGB15087	-0.146152	0.282917	0.61	0.86	-0.285412	0.163773	0.08	0.21
β-Sitosterol	Vescimonas coprocola	0.327455	0.439246	0.46	0.78	0.126937	0.260053	0.63	0.78
β-Sitosterol	Victivallis lenta	0.333286	0.230267	0.15	0.49	-0.215451	0.137186	0.12	0.27
β-Sitosterol	Waltera intestinalis	0.520089	0.438994	0.24	0.59	-0.362513	0.260158	0.16	0.33
Campesterol	Acidaminococcus intestini	-0.241993	0.1848	0.19	0.74	0.41965	0.146583	0.004	0.04
Campesterol	Adlercreutzia equolifaciens	-0.202479	0.228723	0.38	0.79	-0.203992	0.192582	0.29	0.49
Campesterol	Agathobaculum butyriciproducens	0.152425	0.213596	0.48	0.86	-0.0423435	0.178097	0.81	0.91
Campesterol	Akkermansia muciniphila	0.0819283	0.373081	0.83	0.96	-0.030721	0.315458	0.92	0.97
Campesterol	Alistipes communis	0.300919	0.306582	0.33	0.76	0.0294592	0.25054	0.91	0.96
Campesterol	Alistipes dispar	0.186266	0.195308	0.34	0.76	-0.0752392	0.160215	0.64	0.78
Campesterol	Alistipes finegoldii	-0.0597158	0.377058	0.87	0.96	-0.144916	0.306897	0.64	0.78
Campesterol	Alistipes ihumii	-0.0410223	0.262462	0.88	0.96	-0.193382	0.217045	0.37	0.58
Campesterol	Alistipes indistinctus	0.170388	0.260662	0.51	0.87	-0.0437731	0.217631	0.84	0.92
Campesterol	Alistipes onderdonkii	0.404143	0.338466	0.23	0.76	-0.23149	0.277058	0.4	0.61
Campesterol	Alistipes putredinis	0.235115	0.318239	0.46	0.85	-0.197874	0.26029	0.45	0.63
Campesterol	Alistipes senegalensis	0.360304	0.193968	0.06	0.5	-0.175969	0.165093	0.29	0.48
Campesterol	Alistipes shahii	0.00361984	0.303561	0.99	0.99	-0.00860741	0.246513	0.97	0.98
Campesterol	Alistipes sp AF17 16	0.402992	0.218906	0.07	0.51	-0.497841	0.182442	0.006	0.05
Campesterol	Anaerobutyricum hallii	0.318611	0.287354	0.27	0.76	-0.565397	0.24167	0.02	0.09
Campesterol	Anaerobutyricum soehngenii	0.0494146	0.290239	0.86	0.96	0.214385	0.24313	0.38	0.58
Campesterol	Anaerococcus SGB53821	0.0274959	0.127151	0.83	0.96	0.197384	0.10561	0.06	0.18
Campesterol	Anaeromassilibacillus sp An250	0.106115	0.200484	0.6	0.9	-0.34844	0.166846	0.04	0.14
Campesterol	Anaerostipes hadrus	0.0692222	0.181846	0.7	0.95	-0.328368	0.154142	0.03	0.12
Campesterol	Anaerotignum faecicola	0.267483	0.291922	0.36	0.77	0.352096	0.243551	0.15	0.31
Campesterol	Anaerotruncus massiliensis	0.249107	0.225197	0.27	0.76	-0.32103	0.186654	0.09	0.21
Campesterol	Bacteroides caccae	-0.0198151	0.297946	0.95	0.97	-0.297872	0.239506	0.21	0.39
Campesterol	Bacteroides cellulosilyticus	-0.631194	0.40241	0.12	0.63	-0.027648	0.330465	0.93	0.97
Campesterol	Bacteroides eggerthii	-0.374179	0.299706	0.21	0.74	0.0599	0.250654	0.81	0.91
Campesterol	Bacteroides faecis	-0.0793244	0.271736	0.77	0.96	0.333949	0.221484	0.13	0.28
Campesterol	Bacteroides finegoldii	-0.243945	0.249137	0.33	0.76	0.126233	0.198641	0.53	0.7
Campesterol	Bacteroides fragilis	0.257433	0.311403	0.41	0.81	0.438874	0.260052	0.09	0.22
Campesterol	Bacteroides intestinalis	0.117938	0.255341	0.64	0.91	-0.369534	0.208376	0.08	0.2
Campesterol	Bacteroides nordii	-0.0454673	0.268557	0.87	0.96	-0.171902	0.220571	0.44	0.63
Campesterol	Bacteroides ovatus	0.347329	0.293804	0.24	0.76	-0.175078	0.241557	0.47	0.65
Campesterol	Bacteroides salyersiae	-0.0389574	0.220905	0.86	0.96	-0.153204	0.177648	0.39	0.59
Campesterol	Bacteroides stercoris	0.462493	0.44653	0.3	0.76	0.412927	0.356293	0.25	0.44
Campesterol	Bacteroides thetaiotaomicron	0.150757	0.321808	0.64	0.91	0.122715	0.261648	0.64	0.78
Campesterol	Bacteroides uniformis	-0.404664	0.18165	0.03	0.43	0.0894806	0.148404	0.55	0.72
Campesterol	Bacteroides xylanisolvens	-0.205482	0.314309	0.51	0.87	0.493198	0.254987	0.05	0.16
Campesterol	Barnesiella intestinihominis	0.0855752	0.33911	0.8	0.96	-0.688792	0.275623	0.01	0.07
Campesterol	Bifidobacterium adolescentis	0.196744	0.28707	0.49	0.87	-0.00694131	0.239553	0.98	0.98
Campesterol	Bifidobacterium bifidum	-0.42227	0.16509	0.01	0.36	0.00959087	0.1402	0.95	0.98
Campesterol	Bifidobacterium longum	-0.028838	0.333412	0.93	0.97	-0.353223	0.277905	0.2	0.38
Campesterol	Bifidobacterium pseudocatenulatum	-0.0516365	0.211945	0.81	0.96	-0.319347	0.175835	0.07	0.19
Campesterol	Bilophila wadsworthia	-0.0383004	0.296129	0.9	0.96	0.32526	0.24646	0.19	0.36
Campesterol	Blautia SGB4815	0.0939084	0.202822	0.64	0.91	-0.388128	0.171046	0.02	0.1
Campesterol	Blautia caecimuris	-0.387157	0.273964	0.16	0.71	0.906234	0.226631	<0.001	0.004
Campesterol	Blautia faecis	0.292457	0.150193	0.05	0.49	-0.0345004	0.129016	0.79	0.89
Campesterol	Blautia glucerasea	-0.0421625	0.234429	0.86	0.96	-0.380521	0.200578	0.06	0.17
Campesterol	Blautia hydrogenotrophica	-0.117936	0.188242	0.53	0.88	0.353824	0.159702	0.03	0.11
Campesterol	Blautia luti	0.214465	0.194453	0.27	0.76	-0.560024	0.169108	<0.001	0.02
Campesterol	Blautia massiliensis	-0.0688314	0.241377	0.78	0.96	0.273376	0.2038	0.18	0.35
Campesterol	Blautia obeum	-0.18365	0.245491	0.45	0.85	-0.161247	0.207296	0.44	0.63
Campesterol	Blautia producta	-0.127036	0.212082	0.55	0.88	0.453656	0.180342	0.01	0.07
Campesterol	Blautia sp MSK 20 85	0.108602	0.239592	0.65	0.91	-0.320179	0.204768	0.12	0.27
Campesterol	Blautia stercoris	0.0500949	0.187336	0.79	0.96	-0.0297694	0.160653	0.85	0.93
Campesterol	Blautia wexlerae	0.186455	0.128779	0.15	0.71	-0.0056709	0.111606	0.96	0.98
Campesterol	Butyricicoccus sp AM29 23AC	0.0800329	0.235796	0.73	0.96	-0.414756	0.20273	0.04	0.14
Campesterol	Butyricimonas SGB15260	-0.117456	0.232318	0.61	0.91	-0.42034	0.195021	0.03	0.12
Campesterol	Butyricimonas faecihominis	-0.0315857	0.241618	0.9	0.96	0.0905937	0.193288	0.64	0.78
Campesterol	Butyricimonas paravirosa	-0.0580316	0.229551	0.8	0.96	-0.15531	0.190774	0.42	0.62
Campesterol	Butyricimonas virosa	-0.16559	0.214176	0.44	0.85	0.0227961	0.175626	0.9	0.96
Campesterol	Candidatus Avimonas narfia	0.0381584	0.233746	0.87	0.96	-0.202304	0.195199	0.3	0.49
Campesterol	Candidatus Borkfalkia ceftriaxoniphila	0.607481	0.243951	0.01	0.36	-0.108512	0.206129	0.6	0.76
Campesterol	Candidatus Cibionibacter quicibialis	0.480538	0.275843	0.08	0.53	-0.696773	0.22868	0.002	0.03
Campesterol	Candidatus Gastranaerophilales bacterium	0.328448	0.229946	0.15	0.71	-0.0727773	0.191266	0.7	0.83
Campesterol	Candidatus Woodwardibium SGB14954	0.013937	0.167946	0.93	0.97	-0.0697189	0.138982	0.62	0.77
Campesterol	Christensenellaceae bacterium NSJ 63	-0.103868	0.166284	0.53	0.88	-0.0336207	0.142844	0.81	0.91
Campesterol	Clostridia bacterium	-0.142736	0.241479	0.55	0.88	0.497703	0.192203	0.01	0.06
Campesterol	Clostridia bacterium UC5 1 1E11	-0.087919	0.190502	0.64	0.91	0.172951	0.162111	0.29	0.48
Campesterol	Clostridiaceae bacterium	0.155768	0.150036	0.3	0.76	0.138328	0.128184	0.28	0.48
Campesterol	Clostridiaceae bacterium AF18 31LB	0.467681	0.273257	0.09	0.53	-0.21511	0.234433	0.36	0.57
Campesterol	Clostridiaceae bacterium Marseille Q3526	0.0538568	0.185173	0.77	0.96	0.471079	0.153357	0.002	0.03
Campesterol	Clostridiaceae bacterium Marseille Q4143	0.537405	0.265744	0.04	0.49	-0.587139	0.227314	0.01	0.06
Campesterol	Clostridiaceae bacterium Marseille Q4145	0.190922	0.208394	0.36	0.77	-0.18936	0.182627	0.3	0.49
Campesterol	Clostridiaceae bacterium Marseille Q4149	-0.127757	0.276038	0.64	0.91	-0.42423	0.221556	0.06	0.16
Campesterol	Clostridiaceae unclassified SGB15090	0.279908	0.245388	0.25	0.76	-0.013139	0.195808	0.95	0.98
Campesterol	Clostridiaceae unclassified SGB4747	-0.0337312	0.190846	0.86	0.96	0.450823	0.160857	0.005	0.05
Campesterol	Clostridiaceae unclassified SGB4771	0.209233	0.153904	0.17	0.74	0.0218317	0.132416	0.87	0.94
Campesterol	Clostridiales Family XIII bacterium BX16	0.23721	0.230013	0.3	0.76	0.0897493	0.196686	0.65	0.79
Campesterol	Clostridiales bacterium	-0.18153	0.193076	0.35	0.76	0.643574	0.164193	<0.001	0.004
Campesterol	Clostridiales bacterium Choco116	-0.287489	0.228042	0.21	0.74	0.380953	0.188422	0.04	0.14
Campesterol	Clostridiales bacterium KLE1615	0.434776	0.212485	0.04	0.49	0.0251658	0.175879	0.89	0.95
Campesterol	Clostridium SGB4648	0.311557	0.255759	0.22	0.76	-0.597269	0.210121	0.004	0.04
Campesterol	Clostridium SGB4750	0.0395446	0.239235	0.87	0.96	0.185109	0.20424	0.36	0.57
Campesterol	Clostridium butyricum	-0.229242	0.163736	0.16	0.71	0.199887	0.139588	0.15	0.31
Campesterol	Clostridium fessum	0.492749	0.2774	0.08	0.53	-0.260537	0.234208	0.27	0.47
Campesterol	Clostridium leptum	-0.548067	0.217316	0.01	0.36	0.0396227	0.193169	0.84	0.92
Campesterol	Clostridium scindens	-0.160326	0.203355	0.43	0.84	0.475515	0.171191	0.005	0.05
Campesterol	Clostridium sp 1001270H 150608 G6	0.394368	0.307916	0.2	0.74	-0.538187	0.264122	0.04	0.14
Campesterol	Clostridium sp AF20 17LB	0.398354	0.226959	0.08	0.53	-0.542942	0.19916	0.006	0.05
Campesterol	Clostridium sp AF27 2AA	0.117014	0.230675	0.61	0.91	-0.236748	0.194241	0.22	0.4
Campesterol	Clostridium sp AF34 10BH	0.281638	0.266832	0.29	0.76	-0.21129	0.227042	0.35	0.56
Campesterol	Clostridium sp AF34 13	0.0948858	0.249232	0.7	0.95	-0.153318	0.214918	0.48	0.66
Campesterol	Clostridium sp AF36 4	0.683511	0.324808	0.04	0.49	-0.385605	0.275327	0.16	0.33
Campesterol	Clostridium sp AM22 11AC	0.623418	0.310318	0.04	0.49	-0.0719004	0.26277	0.78	0.89
Campesterol	Clostridium sp AM33 3	0.530352	0.249205	0.03	0.49	-0.399793	0.212358	0.06	0.17
Campesterol	Clostridium sp AM49 4BH	-0.0831883	0.306522	0.79	0.96	-0.0994822	0.258512	0.7	0.83
Campesterol	Clostridium sp AT4	-0.108658	0.241907	0.65	0.91	0.72205	0.203453	<0.001	0.01
Campesterol	Clostridium spiroforme	0.080398	0.174201	0.64	0.91	0.0123653	0.150307	0.93	0.97
Campesterol	Clostridium symbiosum	-0.167896	0.199779	0.4	0.81	0.576609	0.166192	<0.001	0.01
Campesterol	Collinsella SGB14861	0.213397	0.305589	0.48	0.86	0.068342	0.254191	0.79	0.89
Campesterol	Collinsella SGB4121	0.0033701	0.189185	0.99	0.99	-0.0592269	0.159023	0.71	0.84
Campesterol	Collinsella aerofaciens	-0.292837	0.191752	0.13	0.65	-0.00959508	0.158284	0.95	0.98
Campesterol	Coprobacter fastidiosus	-0.0267006	0.211451	0.9	0.96	0.0681044	0.172145	0.69	0.82
Campesterol	Coprococcus SGB4669	0.319213	0.210795	0.13	0.65	-0.343956	0.177835	0.05	0.16
Campesterol	Coprococcus catus	0.266052	0.280925	0.34	0.76	-0.55204	0.237346	0.02	0.09
Campesterol	Coprococcus comes	-0.137628	0.27565	0.62	0.91	-0.117234	0.227574	0.61	0.76
Campesterol	Coprococcus eutactus	0.287871	0.288135	0.32	0.76	-0.578295	0.249055	0.02	0.09
Campesterol	Desulfovibrio SGB5077	0.226185	0.247697	0.36	0.77	-0.201773	0.208224	0.33	0.54
Campesterol	Dialister invisus	-0.206327	0.362807	0.57	0.88	-0.0382749	0.302804	0.9	0.96
Campesterol	Dorea formicigenerans	0.192813	0.196002	0.33	0.76	0.146581	0.16265	0.37	0.57
Campesterol	Dorea longicatena	-0.137249	0.232839	0.56	0.88	-0.157148	0.192425	0.41	0.62
Campesterol	Dorea sp AF24 7LB	0.283484	0.204022	0.16	0.71	-0.163475	0.177664	0.36	0.57
Campesterol	Dorea sp AF36 15AT	0.0267818	0.215535	0.9	0.96	-0.12596	0.184795	0.5	0.67
Campesterol	Dysosmobacter sp BX15	0.796561	0.323621	0.01	0.36	-0.567891	0.275045	0.04	0.14
Campesterol	Dysosmobacter sp NSJ 60	-0.190186	0.199602	0.34	0.76	0.451549	0.170336	0.008	0.06
Campesterol	Dysosmobacter welbionis	-0.0806938	0.179328	0.65	0.91	0.43588	0.153433	0.004	0.04
Campesterol	Eggerthella lenta	-0.250146	0.261827	0.34	0.76	0.396351	0.219784	0.07	0.19
Campesterol	Eisenbergiella massiliensis	-0.171262	0.239586	0.47	0.86	-0.063878	0.200211	0.75	0.86
Campesterol	Eisenbergiella tayi	0.0332475	0.181675	0.85	0.96	0.0211336	0.158543	0.89	0.96
Campesterol	Enterocloster SGB14313	-0.15335	0.219823	0.49	0.86	-0.0672237	0.186146	0.72	0.84
Campesterol	Enterocloster aldenensis	-0.395546	0.166572	0.02	0.36	0.514862	0.141349	<0.001	0.008
Campesterol	Enterocloster bolteae	-0.347067	0.250169	0.17	0.71	0.870207	0.210129	<0.001	0.002
Campesterol	Enterocloster citroniae	-0.168343	0.167531	0.31	0.76	0.463072	0.139401	<0.001	0.02
Campesterol	Enterocloster lavalensis	-0.361232	0.189888	0.06	0.49	0.507809	0.159871	0.001	0.03
Campesterol	Erysipelatoclostridium ramosum	-0.204932	0.232622	0.38	0.79	0.460172	0.195001	0.02	0.09
Campesterol	Escherichia coli	-0.107317	0.246517	0.66	0.91	0.658707	0.210368	0.002	0.03
Campesterol	Eubacteriaceae bacterium	0.419354	0.252275	0.1	0.55	-0.345563	0.21496	0.11	0.25
Campesterol	Eubacteriales unclassified SGB15145	0.173979	0.183566	0.34	0.76	-0.388932	0.16102	0.02	0.08
Campesterol	Eubacterium SGB4671	-0.0886385	0.151255	0.56	0.88	-0.0725934	0.123615	0.56	0.73
Campesterol	Eubacterium SGB6276	-0.205938	0.277366	0.46	0.85	-0.86609	0.229566	<0.001	0.007
Campesterol	Eubacterium ramulus	0.171021	0.272808	0.53	0.88	-0.133674	0.228931	0.56	0.73
Campesterol	Eubacterium rectale	0.252281	0.252418	0.32	0.76	0.0224387	0.211118	0.92	0.97
Campesterol	Eubacterium siraeum	0.493775	0.379176	0.19	0.74	-0.636973	0.316057	0.04	0.14
Campesterol	Eubacterium sp AF16 48	0.0876744	0.210063	0.68	0.93	-0.271437	0.179972	0.13	0.28
Campesterol	Eubacterium ventriosum	0.153934	0.241654	0.52	0.88	-0.111268	0.207415	0.59	0.75
Campesterol	Evtepia gabavorous	-0.076665	0.262144	0.77	0.96	0.679469	0.219429	0.002	0.03
Campesterol	Faecalibacillus faecis	-0.214993	0.2112	0.31	0.76	0.18616	0.17715	0.29	0.49
Campesterol	Faecalibacillus intestinalis	0.557469	0.268029	0.04	0.49	-0.628344	0.224986	0.005	0.05
Campesterol	Faecalibacterium SGB15315	0.258643	0.303497	0.39	0.8	-0.240775	0.25339	0.34	0.55
Campesterol	Faecalibacterium SGB15346	0.0432089	0.286872	0.88	0.96	-0.688436	0.232587	0.003	0.04
Campesterol	Faecalibacterium prausnitzii	0.16985	0.129992	0.19	0.74	-0.29431	0.109267	0.007	0.06
Campesterol	Faecalicatena fissicatena	0.00470659	0.293668	0.99	0.99	-0.623645	0.246638	0.01	0.07
Campesterol	Firmicutes bacterium AF16 15	0.898341	0.266814	<0.001	0.12	-0.340062	0.22441	0.13	0.28
Campesterol	Flavonifractor plautii	-0.205142	0.269953	0.45	0.85	1.07839	0.226866	<0.001	<0.001
Campesterol	Fusicatenibacter saccharivorans	0.179151	0.173516	0.3	0.76	0.0769573	0.142479	0.59	0.75
Campesterol	GGB13404 SGB14252	0.5086	0.196285	0.01	0.36	-0.355231	0.165633	0.03	0.12
Campesterol	GGB16040 SGB9347	0.18762	0.249967	0.45	0.85	-0.409986	0.205384	0.05	0.15
Campesterol	GGB2653 SGB3574	-0.229293	0.215751	0.29	0.76	0.158285	0.185884	0.39	0.6
Campesterol	GGB2970 SGB3952	0.316946	0.159858	0.05	0.49	-0.232217	0.137668	0.09	0.22
Campesterol	GGB2980 SGB3962	0.0332132	0.150296	0.83	0.96	-0.072017	0.129659	0.58	0.74
Campesterol	GGB2982 SGB3964	-0.154549	0.218569	0.48	0.86	-0.0897139	0.183269	0.62	0.78
Campesterol	GGB2998 SGB3988	0.359911	0.189427	0.06	0.49	-0.0098048	0.161893	0.95	0.98
Campesterol	GGB3005 SGB3996	0.15251	0.2731	0.58	0.88	0.102264	0.227939	0.65	0.79
Campesterol	GGB3109 SGB4643	0.396944	0.252379	0.12	0.63	-0.78095	0.212101	<0.001	0.008
Campesterol	GGB3167 SGB4181	0.103531	0.206192	0.62	0.91	-0.367379	0.166964	0.03	0.11
Campesterol	GGB3175 SGB4191	0.336833	0.235296	0.15	0.71	-0.42638	0.199517	0.03	0.12
Campesterol	GGB3256 SGB4303	0.599722	0.291932	0.04	0.49	-0.477408	0.247186	0.05	0.16
Campesterol	GGB3277 SGB4327	-0.0779803	0.133043	0.56	0.88	-0.132366	0.108274	0.22	0.4
Campesterol	GGB3278 SGB4328	0.0833302	0.170817	0.63	0.91	-0.130985	0.146746	0.37	0.58
Campesterol	GGB32900 SGB53446	-0.0434195	0.211037	0.84	0.96	-0.116809	0.178622	0.51	0.69
Campesterol	GGB3304 SGB4367	-0.0161505	0.273765	0.95	0.98	-0.402144	0.222363	0.07	0.19
Campesterol	GGB3321 SGB4394	0.367027	0.175147	0.04	0.49	-0.373979	0.150904	0.01	0.07
Campesterol	GGB33469 SGB15236	0.366097	0.270976	0.18	0.74	-0.52252	0.225958	0.02	0.09
Campesterol	GGB33512 SGB15201	-0.114187	0.219264	0.6	0.9	-0.191364	0.183486	0.3	0.49
Campesterol	GGB33512 SGB15203	-0.0370928	0.218716	0.87	0.96	-0.348211	0.181311	0.05	0.16
Campesterol	GGB33586 SGB53517	0.280658	0.202725	0.17	0.71	0.0564847	0.173304	0.74	0.86
Campesterol	GGB33928 SGB15225	-0.209992	0.210286	0.32	0.76	-0.132114	0.178843	0.46	0.64
Campesterol	GGB3475 SGB4638	-0.0268722	0.181699	0.88	0.96	-0.396883	0.153181	0.01	0.06
Campesterol	GGB34797 SGB14322	0.320402	0.167392	0.06	0.49	-0.0935999	0.144215	0.52	0.69
Campesterol	GGB3486 SGB4658	-0.0159055	0.155067	0.92	0.97	-0.333442	0.130548	0.01	0.07
Campesterol	GGB3510 SGB4687	0.143627	0.180329	0.43	0.83	-0.308355	0.150911	0.04	0.14
Campesterol	GGB3537 SGB4727	0.100577	0.170908	0.56	0.88	0.00478599	0.14347	0.97	0.98
Campesterol	GGB3548 SGB4744	0.187329	0.161412	0.25	0.76	0.221892	0.135418	0.1	0.24
Campesterol	GGB3570 SGB4777	0.312058	0.179832	0.08	0.53	-0.459809	0.153789	0.003	0.04
Campesterol	GGB3602 SGB4574	-0.288208	0.230167	0.21	0.74	0.600912	0.189035	0.001	0.03
Campesterol	GGB3612 SGB4882	-0.240333	0.264662	0.36	0.78	-0.391476	0.222071	0.08	0.2
Campesterol	GGB3614 SGB4886	0.157949	0.235676	0.5	0.87	-0.397895	0.199757	0.05	0.15
Campesterol	GGB3619 SGB4894	0.269635	0.211512	0.2	0.74	-0.276449	0.179764	0.12	0.28
Campesterol	GGB36267 SGB14177	-0.133109	0.200976	0.51	0.87	-0.220242	0.170158	0.2	0.37
Campesterol	GGB3653 SGB4964	0.459171	0.239182	0.05	0.49	-0.748104	0.201137	<0.001	0.008
Campesterol	GGB3746 SGB5089	0.167689	0.284285	0.56	0.88	-0.403753	0.242871	0.1	0.23
Campesterol	GGB3819 SGB5184	0.244225	0.210689	0.25	0.76	0.83518	0.176763	<0.001	<0.001
Campesterol	GGB38744 SGB14842	-0.158937	0.186045	0.39	0.8	0.125117	0.159857	0.43	0.63
Campesterol	GGB42994 SGB4746	-0.349333	0.23511	0.14	0.67	0.607021	0.197505	0.002	0.03
Campesterol	GGB45432 SGB63101	0.019784	0.146682	0.89	0.96	-0.0597902	0.12491	0.63	0.78
Campesterol	GGB4566 SGB6305	0.26219	0.204799	0.2	0.74	-0.35029	0.173776	0.04	0.14
Campesterol	GGB4567 SGB6308	0.133517	0.17377	0.44	0.85	-0.242527	0.143284	0.09	0.22
Campesterol	GGB4571 SGB6317	0.0341179	0.155291	0.83	0.96	-0.164401	0.128411	0.2	0.38
Campesterol	GGB4745 SGB6571	-0.09443	0.208665	0.65	0.91	-0.310476	0.178748	0.08	0.21
Campesterol	GGB47687 SGB2286	-0.0572994	0.232054	0.8	0.96	-0.345608	0.191094	0.07	0.19
Campesterol	GGB4802 SGB6641	-0.131902	0.169074	0.44	0.84	0.0630554	0.141926	0.66	0.8
Campesterol	GGB51139 SGB71360	0.0100304	0.144333	0.94	0.97	0.181452	0.120285	0.13	0.28
Campesterol	GGB51269 SGB5062	0.178599	0.186566	0.34	0.76	-0.216449	0.159703	0.18	0.35
Campesterol	GGB51647 SGB4348	-0.392756	0.239076	0.1	0.57	-0.293968	0.197878	0.14	0.29
Campesterol	GGB52130 SGB14966	0.0955015	0.193688	0.62	0.91	-0.0942702	0.163792	0.56	0.73
Campesterol	GGB5980 SGB8599	0.00749589	0.182076	0.97	0.98	-0.00396652	0.149584	0.98	0.98
Campesterol	GGB6612 SGB9346	0.026042	0.207846	0.9	0.96	0.207324	0.169022	0.22	0.4
Campesterol	GGB79630 SGB13983	0.171038	0.213801	0.42	0.83	-0.265169	0.180049	0.14	0.3
Campesterol	GGB79734 SGB15291	0.617343	0.263185	0.02	0.36	-0.585146	0.222009	0.008	0.06
Campesterol	GGB79890 SGB14770	-0.116524	0.240939	0.63	0.91	-0.149968	0.198054	0.45	0.63
Campesterol	GGB79973 SGB14341	0.184501	0.24729	0.46	0.85	-0.0113071	0.206885	0.96	0.98
Campesterol	GGB79998 SGB48024	0.205992	0.212901	0.33	0.76	-0.269089	0.185805	0.15	0.31
Campesterol	GGB80011 SGB15265	0.212729	0.256022	0.41	0.81	-0.147284	0.213653	0.49	0.67
Campesterol	GGB80011 SGB15267	0.53524	0.163271	0.001	0.12	-0.0318048	0.137679	0.82	0.91
Campesterol	GGB80140 SGB15224	0.344832	0.22243	0.12	0.63	-0.333022	0.185222	0.07	0.19
Campesterol	GGB9062 SGB13981	0.182567	0.190387	0.34	0.76	-0.349002	0.159198	0.03	0.11
Campesterol	GGB9063 SGB13982	0.0571543	0.230997	0.8	0.96	-0.249642	0.195193	0.2	0.38
Campesterol	GGB9109 SGB14042	-0.140182	0.184754	0.45	0.85	-0.392619	0.152981	0.01	0.07
Campesterol	GGB9115 SGB14048	0.112403	0.181351	0.54	0.88	-0.179122	0.148729	0.23	0.41
Campesterol	GGB9176 SGB14114	-0.277244	0.26893	0.3	0.76	-0.402798	0.2208	0.07	0.19
Campesterol	GGB9210 SGB14149	0.052216	0.153954	0.73	0.96	-0.151217	0.125712	0.23	0.41
Campesterol	GGB9211 SGB14151	0.336491	0.142536	0.02	0.36	-0.133293	0.119988	0.27	0.47
Campesterol	GGB9237 SGB14179	0.0193763	0.171347	0.91	0.96	-0.228747	0.143325	0.11	0.26
Campesterol	GGB9240 SGB14182	-0.0124873	0.165789	0.94	0.97	-0.0908468	0.14205	0.52	0.7
Campesterol	GGB9296 SGB14253	0.00246341	0.18747	0.99	0.99	-0.397135	0.159955	0.01	0.07
Campesterol	GGB9342 SGB14306	-0.318292	0.301062	0.29	0.76	-0.568436	0.252911	0.02	0.1
Campesterol	GGB9345 SGB14311	-0.0625612	0.268528	0.82	0.96	-0.439752	0.216936	0.04	0.14
Campesterol	GGB9350 SGB14317	-0.0300162	0.214412	0.89	0.96	-0.357375	0.179845	0.05	0.15
Campesterol	GGB9453 SGB14844	0.00294669	0.209863	0.99	0.99	-0.431948	0.175702	0.01	0.08
Campesterol	GGB9480 SGB14874	0.180411	0.27689	0.51	0.87	0.329529	0.23019	0.15	0.31
Campesterol	GGB9495 SGB14892	-0.352155	0.218807	0.11	0.6	-0.436425	0.18112	0.02	0.08
Campesterol	GGB9512 SGB14909	-0.0592525	0.302352	0.84	0.96	0.4611	0.253242	0.07	0.19
Campesterol	GGB9522 SGB14921	-0.022066	0.116663	0.85	0.96	-0.0746462	0.0990677	0.45	0.63
Campesterol	GGB9524 SGB14923	-0.132328	0.186118	0.48	0.86	0.338472	0.157219	0.03	0.12
Campesterol	GGB9524 SGB14924	0.496744	0.258415	0.05	0.49	-0.491871	0.211906	0.02	0.09
Campesterol	GGB9531 SGB14932	0.368901	0.212738	0.08	0.53	-0.195923	0.178959	0.27	0.47
Campesterol	GGB9534 SGB14937	0.032993	0.227206	0.88	0.96	-0.0114831	0.191186	0.95	0.98
Campesterol	GGB9551 SGB14958	-0.0842823	0.140443	0.55	0.88	-0.195171	0.117562	0.1	0.23
Campesterol	GGB9602 SGB15028	0.0699524	0.187663	0.71	0.95	-0.0201488	0.159248	0.9	0.96
Campesterol	GGB9602 SGB15031	0.287414	0.29595	0.33	0.76	-0.560771	0.245877	0.02	0.1
Campesterol	GGB9614 SGB15049	0.290331	0.227066	0.2	0.74	-0.245096	0.191542	0.2	0.38
Campesterol	GGB9619 SGB15066	0.387101	0.201513	0.05	0.49	-0.0397119	0.172527	0.82	0.91
Campesterol	GGB9619 SGB15067	-0.406955	0.214354	0.06	0.49	-0.138951	0.178588	0.44	0.63
Campesterol	GGB9621 SGB15073	0.0235173	0.203649	0.91	0.96	-0.0608674	0.171484	0.72	0.84
Campesterol	GGB9627 SGB15081	0.0283579	0.204823	0.89	0.96	0.11321	0.172193	0.51	0.69
Campesterol	GGB9634 SGB15093	-0.0473598	0.234493	0.84	0.96	-0.185888	0.193469	0.34	0.54
Campesterol	GGB9635 SGB15106	0.295278	0.258865	0.25	0.76	-0.569562	0.21143	0.007	0.06
Campesterol	GGB9677 SGB15180	-0.120903	0.216677	0.58	0.88	-0.478158	0.180391	0.008	0.06
Campesterol	GGB9699 SGB15216	0.242847	0.273862	0.38	0.79	-0.0975396	0.228942	0.67	0.81
Campesterol	GGB9707 SGB15229	0.253438	0.243351	0.3	0.76	-0.387378	0.203977	0.06	0.17
Campesterol	GGB9708 SGB15233	-0.0283319	0.224943	0.9	0.96	-0.443743	0.185418	0.02	0.08
Campesterol	GGB9708 SGB15234	-0.101821	0.336576	0.76	0.96	-0.611959	0.274695	0.03	0.11
Campesterol	GGB9712 SGB15244	0.0891587	0.245663	0.72	0.96	-0.839801	0.203484	<0.001	0.002
Campesterol	GGB9713 SGB15249	0.356272	0.32425	0.27	0.76	-0.70693	0.268643	0.009	0.06
Campesterol	GGB9719 SGB15273	0.0198433	0.177495	0.91	0.96	0.052018	0.14798	0.73	0.84
Campesterol	GGB9747 SGB15356	0.287847	0.265695	0.28	0.76	-0.442699	0.218052	0.04	0.14
Campesterol	GGB9758 SGB15368	0.604599	0.272974	0.03	0.43	-0.669966	0.222006	0.003	0.03
Campesterol	GGB9759 SGB15370	0.437315	0.244834	0.07	0.53	0.217452	0.201298	0.28	0.48
Campesterol	GGB9760 SGB15373	0.862285	0.270339	0.001	0.12	-0.534726	0.228339	0.02	0.09
Campesterol	GGB9760 SGB15374	-0.0680651	0.238263	0.78	0.96	-0.133951	0.194283	0.49	0.67
Campesterol	GGB9765 SGB15382	-0.0365985	0.206081	0.86	0.96	-0.189703	0.171671	0.27	0.47
Campesterol	GGB9770 SGB15390	0.015053	0.268542	0.96	0.98	-0.300604	0.224909	0.18	0.36
Campesterol	GGB9775 SGB15395	0.262416	0.236638	0.27	0.76	-0.399985	0.197396	0.04	0.14
Campesterol	GGB9781 SGB66170	0.100029	0.172971	0.56	0.88	-0.24914	0.145616	0.09	0.22
Campesterol	GGB9782 SGB15403	-0.111621	0.17124	0.51	0.87	-0.315302	0.136725	0.02	0.09
Campesterol	GGB9818 SGB15459	0.0152515	0.183281	0.93	0.97	-0.0455117	0.152146	0.76	0.88
Campesterol	Gemmiger SGB15295	0.811092	0.268506	0.003	0.17	-0.0538436	0.218785	0.81	0.91
Campesterol	Gemmiger SGB15299	0.278636	0.256306	0.28	0.76	-0.296533	0.216089	0.17	0.34
Campesterol	Gemmiger formicilis	-0.100091	0.329886	0.76	0.96	-0.465437	0.280144	0.1	0.23
Campesterol	Gordonibacter pamelaeae	-0.0661398	0.184271	0.72	0.96	0.191322	0.155901	0.22	0.4
Campesterol	Gordonibacter urolithinfaciens	0.0312686	0.153547	0.84	0.96	-0.0107971	0.129571	0.93	0.97
Campesterol	Haemophilus parainfluenzae	-0.156074	0.154174	0.31	0.76	0.08015	0.136983	0.56	0.73
Campesterol	Holdemanella porci	0.315415	0.179163	0.08	0.53	0.15944	0.152654	0.3	0.49
Campesterol	Holdemania filiformis	-0.111449	0.187958	0.55	0.88	0.287168	0.16052	0.07	0.19
Campesterol	Hungatella hathewayi	-0.0387816	0.181824	0.83	0.96	0.23573	0.156197	0.13	0.28
Campesterol	Hydrogenoanaerobacterium saccharovorans	-0.537214	0.218334	0.01	0.36	0.00239789	0.186248	0.99	0.99
Campesterol	Intestinimonas butyriciproducens	-0.00782232	0.252202	0.98	0.99	0.366676	0.210933	0.08	0.21
Campesterol	Intestinimonas massiliensis	-0.183719	0.228357	0.42	0.83	-0.185032	0.190579	0.33	0.54
Campesterol	Lachnospira eligens	0.0726873	0.32436	0.82	0.96	-0.232296	0.26754	0.39	0.59
Campesterol	Lachnospira pectinoschiza	-0.346903	0.310095	0.26	0.76	0.0568538	0.25961	0.83	0.91
Campesterol	Lachnospira sp NSJ 43	0.0696775	0.31267	0.82	0.96	-0.748185	0.261041	0.004	0.04
Campesterol	Lachnospiraceae bacterium	0.177366	0.258802	0.49	0.87	-0.339737	0.219672	0.12	0.27
Campesterol	Lachnospiraceae bacterium AM48 27BH	0.345586	0.241792	0.15	0.71	-0.535549	0.206184	0.009	0.06
Campesterol	Lachnospiraceae bacterium BX3	0.151745	0.150408	0.31	0.76	-0.379211	0.126185	0.003	0.03
Campesterol	Lachnospiraceae bacterium Marseille Q4251	0.51064	0.218384	0.02	0.36	-0.497639	0.186791	0.008	0.06
Campesterol	Lachnospiraceae bacterium OM04 12BH	-0.0415716	0.211622	0.84	0.96	-0.414754	0.179182	0.02	0.09
Campesterol	Lacrimispora amygdalina	0.0573081	0.276145	0.84	0.96	-0.0508918	0.232568	0.83	0.91
Campesterol	Lacrimispora celerecrescens	0.114359	0.282629	0.69	0.93	-0.31921	0.238053	0.18	0.35
Campesterol	Lawsonibacter asaccharolyticus	0.104824	0.187561	0.58	0.88	0.108624	0.162387	0.5	0.68
Campesterol	Lawsonibacter sp NSJ 51	0.134547	0.222191	0.54	0.88	-0.164218	0.18666	0.38	0.58
Campesterol	Longicatena caecimuris	-0.106033	0.191697	0.58	0.88	0.254109	0.164371	0.12	0.27
Campesterol	Massilistercora timonensis	-0.0457271	0.17092	0.79	0.96	-0.19134	0.144517	0.19	0.36
Campesterol	Mediterraneibacter butyricigenes	-0.106667	0.204133	0.6	0.9	-0.103734	0.174304	0.55	0.72
Campesterol	Mediterraneibacter glycyrrhizinilyticus	-0.176744	0.20478	0.39	0.8	1.00539	0.173114	<0.001	<0.001
Campesterol	Methanobrevibacter smithii	-0.291798	0.266368	0.27	0.76	-0.718327	0.22171	0.001	0.03
Campesterol	Methylobacterium SGB15164	-0.0831823	0.260645	0.75	0.96	0.0431757	0.218022	0.84	0.92
Campesterol	Monoglobus pectinilyticus	0.4716	0.333312	0.16	0.71	0.296999	0.277732	0.28	0.48
Campesterol	Negativibacillus massiliensis	-0.429256	0.251647	0.09	0.53	-0.405605	0.207955	0.05	0.16
Campesterol	Neglectibacter timonensis	-0.257881	0.237266	0.28	0.76	-0.11487	0.206218	0.58	0.74
Campesterol	Nitrosopumilus SGB14899	0.223993	0.232913	0.34	0.76	0.0330228	0.198136	0.87	0.94
Campesterol	Odoribacter splanchnicus	0.476257	0.236149	0.04	0.49	0.00843979	0.193152	0.97	0.98
Campesterol	Oscillibacter sp ER4	0.591172	0.323131	0.07	0.51	-0.845921	0.270148	0.002	0.03
Campesterol	Oscillospiraceae bacterium	0.0974656	0.234048	0.68	0.93	0.151115	0.197922	0.45	0.63
Campesterol	Oscillospiraceae bacterium BX1	0.142569	0.139742	0.31	0.76	-0.282849	0.116093	0.01	0.08
Campesterol	Oscillospiraceae bacterium Marseille Q3528	0.251858	0.206756	0.22	0.76	-0.361875	0.179627	0.04	0.14
Campesterol	Parabacteroides distasonis	-0.481297	0.258813	0.06	0.5	0.134328	0.211526	0.53	0.7
Campesterol	Parabacteroides goldsteinii	0.330905	0.252823	0.19	0.74	-0.382605	0.207569	0.07	0.18
Campesterol	Parabacteroides johnsonii	-0.133935	0.208619	0.52	0.88	0.133415	0.166399	0.42	0.62
Campesterol	Parabacteroides merdae	-0.328953	0.318924	0.3	0.76	0.140518	0.258451	0.59	0.75
Campesterol	Paraprevotella clara	-0.282369	0.282291	0.32	0.76	0.187406	0.229402	0.41	0.62
Campesterol	Parasutterella SGB9260	-0.219925	0.232849	0.34	0.76	0.325581	0.184506	0.08	0.2
Campesterol	Parasutterella excrementihominis	-0.534866	0.297926	0.07	0.53	-0.492806	0.249724	0.05	0.15
Campesterol	Phascolarctobacterium SGB4573	0.0820234	0.234755	0.73	0.96	0.252924	0.196277	0.2	0.38
Campesterol	Phascolarctobacterium faecium	0.822491	0.360759	0.02	0.4	0.379736	0.299179	0.2	0.38
Campesterol	Phocaeicola SGB6473	-0.0938978	0.163428	0.57	0.88	-0.319539	0.139695	0.02	0.1
Campesterol	Phocaeicola dorei	-0.292628	0.446412	0.51	0.87	0.472577	0.362851	0.19	0.37
Campesterol	Phocaeicola massiliensis	-0.307502	0.304367	0.31	0.76	0.0968795	0.242169	0.69	0.82
Campesterol	Phocaeicola vulgatus	-0.447883	0.287965	0.12	0.63	-0.0972301	0.231125	0.67	0.81
Campesterol	Prevotella copri clade A	-0.0234329	0.273356	0.93	0.97	-0.0835166	0.238417	0.73	0.84
Campesterol	Pseudoruminococcus massiliensis	0.172858	0.178523	0.33	0.76	-0.230138	0.145259	0.11	0.26
Campesterol	Rheinheimera SGB14999	-0.21654	0.195607	0.27	0.76	0.1563	0.164598	0.34	0.55
Campesterol	Rikenellaceae bacterium	0.0340672	0.203061	0.87	0.96	0.324781	0.160993	0.04	0.14
Campesterol	Romboutsia timonensis	-0.181872	0.167499	0.28	0.76	-0.370124	0.144445	0.01	0.07
Campesterol	Roseburia faecis	0.0222817	0.309021	0.94	0.97	-0.206866	0.264624	0.43	0.63
Campesterol	Roseburia hominis	0.291433	0.238745	0.22	0.76	-0.138625	0.202644	0.49	0.67
Campesterol	Roseburia intestinalis	-0.165899	0.293363	0.57	0.88	0.192211	0.252305	0.45	0.63
Campesterol	Roseburia inulinivorans	0.0538191	0.280025	0.85	0.96	0.473622	0.23452	0.04	0.14
Campesterol	Roseburia sp AF02 12	0.239423	0.32724	0.46	0.85	-0.574721	0.278998	0.04	0.14
Campesterol	Roseburia sp AM16 25	0.393603	0.211963	0.06	0.5	-0.278034	0.181719	0.13	0.28
Campesterol	Ruminococcaceae bacterium D5	-0.176204	0.131819	0.18	0.74	-0.0107897	0.11041	0.92	0.97
Campesterol	Ruminococcus SGB4421	0.0935552	0.21164	0.66	0.91	-0.258775	0.181842	0.15	0.32
Campesterol	Ruminococcus bicirculans	0.499352	0.329554	0.13	0.65	-0.794582	0.276045	0.004	0.04
Campesterol	Ruminococcus bromii	0.458119	0.388244	0.24	0.76	-0.702622	0.323601	0.03	0.12
Campesterol	Ruminococcus callidus	-0.17668	0.204203	0.39	0.8	-0.19231	0.174123	0.27	0.47
Campesterol	Ruminococcus gnavus	-0.531354	0.30725	0.08	0.53	0.676434	0.259764	0.009	0.06
Campesterol	Ruminococcus lactaris	0.551377	0.331587	0.1	0.55	-0.425044	0.278561	0.13	0.28
Campesterol	Ruminococcus sp BSD2780120874 150323 B10	0.0662414	0.246657	0.79	0.96	-0.0781346	0.212489	0.71	0.84
Campesterol	Ruminococcus torques	0.292409	0.173961	0.09	0.55	0.116272	0.14966	0.44	0.63
Campesterol	Ruthenibacterium lactatiformans	-0.373337	0.178344	0.04	0.49	0.374389	0.156365	0.02	0.08
Campesterol	Sanguibacter SGB15121	0.0531936	0.164056	0.75	0.96	-0.329848	0.134551	0.01	0.08
Campesterol	Sellimonas intestinalis	-0.210318	0.162729	0.2	0.74	-0.0242036	0.136757	0.86	0.93
Campesterol	Staphylococcus SGB6340	0.0448968	0.206588	0.83	0.96	-0.504955	0.174867	0.004	0.04
Campesterol	Streptococcus parasanguinis	-1.0077	0.219689	<0.001	0.002	0.530316	0.188617	0.005	0.05
Campesterol	Streptococcus salivarius	-0.583321	0.248306	0.02	0.36	0.0914314	0.211804	0.67	0.8
Campesterol	Streptococcus thermophilus	-0.250159	0.188132	0.18	0.74	-0.135714	0.161957	0.4	0.61
Campesterol	Sutterella wadsworthensis	0.245901	0.27341	0.37	0.78	0.167623	0.223074	0.45	0.63
Campesterol	Veillonella dispar	-0.435179	0.156124	0.005	0.3	0.241267	0.134408	0.07	0.19
Campesterol	Vescimonas SGB15087	0.0483954	0.19299	0.8	0.96	-0.285412	0.163773	0.08	0.21
Campesterol	Vescimonas coprocola	0.395953	0.311724	0.2	0.74	0.126937	0.260053	0.63	0.78
Campesterol	Victivallis lenta	0.218449	0.167621	0.19	0.74	-0.215451	0.137186	0.12	0.27
Campesterol	Waltera intestinalis	0.74859	0.30388	0.01	0.36	-0.362513	0.260158	0.16	0.33
Stigmasterol	Acidaminococcus intestini	0.0110795	0.160063	0.94	0.98	0.41965	0.146583	0.004	0.04
Stigmasterol	Adlercreutzia equolifaciens	0.219071	0.201507	0.28	0.73	-0.203992	0.192582	0.29	0.49
Stigmasterol	Agathobaculum butyriciproducens	0.291609	0.183329	0.11	0.57	-0.0423435	0.178097	0.81	0.91
Stigmasterol	Akkermansia muciniphila	-0.225978	0.332725	0.5	0.87	-0.030721	0.315458	0.92	0.97
Stigmasterol	Alistipes communis	0.260701	0.266626	0.33	0.77	0.0294592	0.25054	0.91	0.96
Stigmasterol	Alistipes dispar	0.0830461	0.172172	0.63	0.94	-0.0752392	0.160215	0.64	0.78
Stigmasterol	Alistipes finegoldii	0.089686	0.329219	0.79	0.97	-0.144916	0.306897	0.64	0.78
Stigmasterol	Alistipes ihumii	0.124228	0.230983	0.59	0.93	-0.193382	0.217045	0.37	0.58
Stigmasterol	Alistipes indistinctus	0.390488	0.228236	0.09	0.54	-0.0437731	0.217631	0.84	0.92
Stigmasterol	Alistipes onderdonkii	0.564349	0.29443	0.06	0.45	-0.23149	0.277058	0.4	0.61
Stigmasterol	Alistipes putredinis	0.676032	0.278821	0.02	0.32	-0.197874	0.26029	0.45	0.63
Stigmasterol	Alistipes senegalensis	-0.0216744	0.174506	0.9	0.98	-0.175969	0.165093	0.29	0.48
Stigmasterol	Alistipes shahii	0.120471	0.265084	0.65	0.94	-0.00860741	0.246513	0.97	0.98
Stigmasterol	Alistipes sp AF17 16	0.0766996	0.193155	0.69	0.97	-0.497841	0.182442	0.006	0.05
Stigmasterol	Anaerobutyricum hallii	0.625945	0.252474	0.01	0.32	-0.565397	0.24167	0.02	0.09
Stigmasterol	Anaerobutyricum soehngenii	-0.0165425	0.255951	0.95	0.98	0.214385	0.24313	0.38	0.58
Stigmasterol	Anaerococcus SGB53821	0.059011	0.110512	0.59	0.93	0.197384	0.10561	0.06	0.18
Stigmasterol	Anaeromassilibacillus sp An250	-0.36542	0.173833	0.04	0.38	-0.34844	0.166846	0.04	0.14
Stigmasterol	Anaerostipes hadrus	-0.0891189	0.158802	0.57	0.92	-0.328368	0.154142	0.03	0.12
Stigmasterol	Anaerotignum faecicola	0.437481	0.25737	0.09	0.54	0.352096	0.243551	0.15	0.31
Stigmasterol	Anaerotruncus massiliensis	0.121865	0.195648	0.53	0.89	-0.32103	0.186654	0.09	0.21
Stigmasterol	Bacteroides caccae	-0.0148294	0.255447	0.95	0.98	-0.297872	0.239506	0.21	0.39
Stigmasterol	Bacteroides cellulosilyticus	0.116621	0.359655	0.75	0.97	-0.027648	0.330465	0.93	0.97
Stigmasterol	Bacteroides eggerthii	-0.100513	0.272633	0.71	0.97	0.0599	0.250654	0.81	0.91
Stigmasterol	Bacteroides faecis	-0.128869	0.241486	0.59	0.93	0.333949	0.221484	0.13	0.28
Stigmasterol	Bacteroides finegoldii	0.502964	0.215555	0.02	0.33	0.126233	0.198641	0.53	0.7
Stigmasterol	Bacteroides fragilis	0.603204	0.275466	0.03	0.35	0.438874	0.260052	0.09	0.22
Stigmasterol	Bacteroides intestinalis	0.362881	0.222778	0.1	0.56	-0.369534	0.208376	0.08	0.2
Stigmasterol	Bacteroides nordii	0.313752	0.233316	0.18	0.71	-0.171902	0.220571	0.44	0.63
Stigmasterol	Bacteroides ovatus	0.0268385	0.255928	0.92	0.98	-0.175078	0.241557	0.47	0.65
Stigmasterol	Bacteroides salyersiae	0.276553	0.194989	0.16	0.7	-0.153204	0.177648	0.39	0.59
Stigmasterol	Bacteroides stercoris	0.293237	0.393839	0.46	0.86	0.412927	0.356293	0.25	0.44
Stigmasterol	Bacteroides thetaiotaomicron	0.498575	0.278497	0.07	0.54	0.122715	0.261648	0.64	0.78
Stigmasterol	Bacteroides uniformis	-0.0611464	0.158616	0.7	0.97	0.0894806	0.148404	0.55	0.72
Stigmasterol	Bacteroides xylanisolvens	0.164672	0.273086	0.55	0.9	0.493198	0.254987	0.05	0.16
Stigmasterol	Barnesiella intestinihominis	-0.0857533	0.299527	0.77	0.97	-0.688792	0.275623	0.01	0.07
Stigmasterol	Bifidobacterium adolescentis	-0.28695	0.253024	0.26	0.73	-0.00694131	0.239553	0.98	0.98
Stigmasterol	Bifidobacterium bifidum	-0.126881	0.147921	0.39	0.81	0.00959087	0.1402	0.95	0.98
Stigmasterol	Bifidobacterium longum	-0.558645	0.291762	0.06	0.45	-0.353223	0.277905	0.2	0.38
Stigmasterol	Bifidobacterium pseudocatenulatum	0.00941729	0.185253	0.96	0.98	-0.319347	0.175835	0.07	0.19
Stigmasterol	Bilophila wadsworthia	0.635752	0.256228	0.01	0.32	0.32526	0.24646	0.19	0.36
Stigmasterol	Blautia SGB4815	0.125416	0.179889	0.49	0.87	-0.388128	0.171046	0.02	0.1
Stigmasterol	Blautia caecimuris	-0.258122	0.238469	0.28	0.73	0.906234	0.226631	<0.001	0.004
Stigmasterol	Blautia faecis	0.157435	0.13453	0.24	0.71	-0.0345004	0.129016	0.79	0.89
Stigmasterol	Blautia glucerasea	0.0770071	0.208817	0.71	0.97	-0.380521	0.200578	0.06	0.17
Stigmasterol	Blautia hydrogenotrophica	-0.163501	0.165194	0.32	0.76	0.353824	0.159702	0.03	0.11
Stigmasterol	Blautia luti	0.0728858	0.177112	0.68	0.97	-0.560024	0.169108	<0.001	0.02
Stigmasterol	Blautia massiliensis	0.226459	0.210722	0.28	0.73	0.273376	0.2038	0.18	0.35
Stigmasterol	Blautia obeum	0.21372	0.21514	0.32	0.76	-0.161247	0.207296	0.44	0.63
Stigmasterol	Blautia producta	-0.125118	0.187705	0.51	0.87	0.453656	0.180342	0.01	0.07
Stigmasterol	Blautia sp MSK 20 85	-0.272074	0.213338	0.2	0.71	-0.320179	0.204768	0.12	0.27
Stigmasterol	Blautia stercoris	-0.0132771	0.168149	0.94	0.98	-0.0297694	0.160653	0.85	0.93
Stigmasterol	Blautia wexlerae	0.108567	0.114924	0.34	0.77	-0.0056709	0.111606	0.96	0.98
Stigmasterol	Butyricicoccus sp AM29 23AC	0.102852	0.21327	0.63	0.94	-0.414756	0.20273	0.04	0.14
Stigmasterol	Butyricimonas SGB15260	-0.0515331	0.210265	0.81	0.97	-0.42034	0.195021	0.03	0.12
Stigmasterol	Butyricimonas faecihominis	-0.101557	0.210622	0.63	0.94	0.0905937	0.193288	0.64	0.78
Stigmasterol	Butyricimonas paravirosa	0.490192	0.201264	0.01	0.32	-0.15531	0.190774	0.42	0.62
Stigmasterol	Butyricimonas virosa	-0.328196	0.187751	0.08	0.54	0.0227961	0.175626	0.9	0.96
Stigmasterol	Candidatus Avimonas narfia	0.208364	0.203638	0.31	0.75	-0.202304	0.195199	0.3	0.49
Stigmasterol	Candidatus Borkfalkia ceftriaxoniphila	0.197965	0.21466	0.36	0.78	-0.108512	0.206129	0.6	0.76
Stigmasterol	Candidatus Cibionibacter quicibialis	0.168338	0.2416	0.49	0.87	-0.696773	0.22868	0.002	0.03
Stigmasterol	Candidatus Gastranaerophilales bacterium	0.307233	0.20229	0.13	0.62	-0.0727773	0.191266	0.7	0.83
Stigmasterol	Candidatus Woodwardibium SGB14954	0.0300722	0.148984	0.84	0.97	-0.0697189	0.138982	0.62	0.77
Stigmasterol	Christensenellaceae bacterium NSJ 63	-0.00728875	0.147344	0.96	0.98	-0.0336207	0.142844	0.81	0.91
Stigmasterol	Clostridia bacterium	-0.36127	0.20629	0.08	0.54	0.497703	0.192203	0.01	0.06
Stigmasterol	Clostridia bacterium UC5 1 1E11	0.00936827	0.167051	0.96	0.98	0.172951	0.162111	0.29	0.48
Stigmasterol	Clostridiaceae bacterium	0.123715	0.132323	0.35	0.77	0.138328	0.128184	0.28	0.48
Stigmasterol	Clostridiaceae bacterium AF18 31LB	0.51235	0.241248	0.03	0.38	-0.21511	0.234433	0.36	0.57
Stigmasterol	Clostridiaceae bacterium Marseille Q3526	-0.0462976	0.1598	0.77	0.97	0.471079	0.153357	0.002	0.03
Stigmasterol	Clostridiaceae bacterium Marseille Q4143	0.520048	0.236129	0.03	0.35	-0.587139	0.227314	0.01	0.06
Stigmasterol	Clostridiaceae bacterium Marseille Q4145	0.316102	0.189368	0.1	0.54	-0.18936	0.182627	0.3	0.49
Stigmasterol	Clostridiaceae bacterium Marseille Q4149	0.267827	0.24123	0.27	0.73	-0.42423	0.221556	0.06	0.16
Stigmasterol	Clostridiaceae unclassified SGB15090	-0.16198	0.210881	0.44	0.85	-0.013139	0.195808	0.95	0.98
Stigmasterol	Clostridiaceae unclassified SGB4747	0.0491298	0.170514	0.77	0.97	0.450823	0.160857	0.005	0.05
Stigmasterol	Clostridiaceae unclassified SGB4771	0.136457	0.13783	0.32	0.76	0.0218317	0.132416	0.87	0.94
Stigmasterol	Clostridiales Family XIII bacterium BX16	0.252386	0.203931	0.22	0.71	0.0897493	0.196686	0.65	0.79
Stigmasterol	Clostridiales bacterium	0.257132	0.172073	0.14	0.64	0.643574	0.164193	<0.001	0.004
Stigmasterol	Clostridiales bacterium Choco116	-0.0250844	0.199506	0.9	0.98	0.380953	0.188422	0.04	0.14
Stigmasterol	Clostridiales bacterium KLE1615	0.402541	0.182716	0.03	0.35	0.0251658	0.175879	0.89	0.95
Stigmasterol	Clostridium SGB4648	0.0154539	0.224231	0.95	0.98	-0.597269	0.210121	0.004	0.04
Stigmasterol	Clostridium SGB4750	0.174644	0.212528	0.41	0.83	0.185109	0.20424	0.36	0.57
Stigmasterol	Clostridium butyricum	-0.122611	0.143021	0.39	0.81	0.199887	0.139588	0.15	0.31
Stigmasterol	Clostridium fessum	0.395489	0.246794	0.11	0.57	-0.260537	0.234208	0.27	0.47
Stigmasterol	Clostridium leptum	-0.407316	0.194109	0.04	0.38	0.0396227	0.193169	0.84	0.92
Stigmasterol	Clostridium scindens	-0.174501	0.178159	0.33	0.77	0.475515	0.171191	0.005	0.05
Stigmasterol	Clostridium sp 1001270H 150608 G6	0.567822	0.275917	0.04	0.4	-0.538187	0.264122	0.04	0.14
Stigmasterol	Clostridium sp AF20 17LB	0.291577	0.203765	0.15	0.7	-0.542942	0.19916	0.006	0.05
Stigmasterol	Clostridium sp AF27 2AA	0.153516	0.202131	0.45	0.85	-0.236748	0.194241	0.22	0.4
Stigmasterol	Clostridium sp AF34 10BH	0.406627	0.236158	0.09	0.54	-0.21129	0.227042	0.35	0.56
Stigmasterol	Clostridium sp AF34 13	0.104317	0.223277	0.64	0.94	-0.153318	0.214918	0.48	0.66
Stigmasterol	Clostridium sp AF36 4	0.252753	0.287637	0.38	0.8	-0.385605	0.275327	0.16	0.33
Stigmasterol	Clostridium sp AM22 11AC	0.315674	0.275747	0.25	0.72	-0.0719004	0.26277	0.78	0.89
Stigmasterol	Clostridium sp AM33 3	0.291183	0.221274	0.19	0.71	-0.399793	0.212358	0.06	0.17
Stigmasterol	Clostridium sp AM49 4BH	-0.212089	0.271121	0.43	0.85	-0.0994822	0.258512	0.7	0.83
Stigmasterol	Clostridium sp AT4	-0.265109	0.211254	0.21	0.71	0.72205	0.203453	<0.001	0.01
Stigmasterol	Clostridium spiroforme	-0.118648	0.155633	0.45	0.85	0.0123653	0.150307	0.93	0.97
Stigmasterol	Clostridium symbiosum	-0.326726	0.172175	0.06	0.46	0.576609	0.166192	<0.001	0.01
Stigmasterol	Collinsella SGB14861	0.42335	0.265851	0.11	0.57	0.068342	0.254191	0.79	0.89
Stigmasterol	Collinsella SGB4121	0.112861	0.1674	0.5	0.87	-0.0592269	0.159023	0.71	0.84
Stigmasterol	Collinsella aerofaciens	0.0215239	0.165591	0.9	0.98	-0.00959508	0.158284	0.95	0.98
Stigmasterol	Coprobacter fastidiosus	-0.0483596	0.184062	0.79	0.97	0.0681044	0.172145	0.69	0.82
Stigmasterol	Coprococcus SGB4669	0.313689	0.188179	0.1	0.54	-0.343956	0.177835	0.05	0.16
Stigmasterol	Coprococcus catus	0.494341	0.249237	0.05	0.44	-0.55204	0.237346	0.02	0.09
Stigmasterol	Coprococcus comes	-0.00720149	0.241635	0.98	0.99	-0.117234	0.227574	0.61	0.76
Stigmasterol	Coprococcus eutactus	0.223162	0.262774	0.4	0.82	-0.578295	0.249055	0.02	0.09
Stigmasterol	Desulfovibrio SGB5077	0.0820696	0.218876	0.71	0.97	-0.201773	0.208224	0.33	0.54
Stigmasterol	Dialister invisus	-0.352751	0.320862	0.27	0.73	-0.0382749	0.302804	0.9	0.96
Stigmasterol	Dorea formicigenerans	0.380472	0.167903	0.02	0.35	0.146581	0.16265	0.37	0.57
Stigmasterol	Dorea longicatena	-0.106148	0.202348	0.6	0.93	-0.157148	0.192425	0.41	0.62
Stigmasterol	Dorea sp AF24 7LB	0.24247	0.18677	0.19	0.71	-0.163475	0.177664	0.36	0.57
Stigmasterol	Dorea sp AF36 15AT	0.0220701	0.1908	0.91	0.98	-0.12596	0.184795	0.5	0.67
Stigmasterol	Dysosmobacter sp BX15	0.707624	0.286535	0.01	0.32	-0.567891	0.275045	0.04	0.14
Stigmasterol	Dysosmobacter sp NSJ 60	-0.0304095	0.176859	0.86	0.98	0.451549	0.170336	0.008	0.06
Stigmasterol	Dysosmobacter welbionis	0.0864091	0.15756	0.58	0.93	0.43588	0.153433	0.004	0.04
Stigmasterol	Eggerthella lenta	-0.240215	0.231115	0.3	0.74	0.396351	0.219784	0.07	0.19
Stigmasterol	Eisenbergiella massiliensis	-0.227801	0.209257	0.28	0.73	-0.063878	0.200211	0.75	0.86
Stigmasterol	Eisenbergiella tayi	-0.011021	0.16294	0.95	0.98	0.0211336	0.158543	0.89	0.96
Stigmasterol	Enterocloster SGB14313	0.0683722	0.197273	0.73	0.97	-0.0672237	0.186146	0.72	0.84
Stigmasterol	Enterocloster aldenensis	-0.375692	0.145522	0.01	0.32	0.514862	0.141349	<0.001	0.008
Stigmasterol	Enterocloster bolteae	-0.419633	0.218184	0.05	0.45	0.870207	0.210129	<0.001	0.002
Stigmasterol	Enterocloster citroniae	-0.103914	0.145438	0.47	0.87	0.463072	0.139401	<0.001	0.02
Stigmasterol	Enterocloster lavalensis	-0.221803	0.165826	0.18	0.71	0.507809	0.159871	0.001	0.03
Stigmasterol	Erysipelatoclostridium ramosum	0.0407754	0.202306	0.84	0.97	0.460172	0.195001	0.02	0.09
Stigmasterol	Escherichia coli	0.206332	0.218598	0.35	0.77	0.658707	0.210368	0.002	0.03
Stigmasterol	Eubacteriaceae bacterium	0.154691	0.225184	0.49	0.87	-0.345563	0.21496	0.11	0.25
Stigmasterol	Eubacteriales unclassified SGB15145	0.278991	0.164866	0.09	0.54	-0.388932	0.16102	0.02	0.08
Stigmasterol	Eubacterium SGB4671	-0.123446	0.132458	0.35	0.77	-0.0725934	0.123615	0.56	0.73
Stigmasterol	Eubacterium SGB6276	0.0249468	0.244867	0.92	0.98	-0.86609	0.229566	<0.001	0.007
Stigmasterol	Eubacterium ramulus	0.0188031	0.240313	0.94	0.98	-0.133674	0.228931	0.56	0.73
Stigmasterol	Eubacterium rectale	0.389391	0.218432	0.07	0.54	0.0224387	0.211118	0.92	0.97
Stigmasterol	Eubacterium siraeum	0.224262	0.333559	0.5	0.87	-0.636973	0.316057	0.04	0.14
Stigmasterol	Eubacterium sp AF16 48	-0.180447	0.188188	0.34	0.77	-0.271437	0.179972	0.13	0.28
Stigmasterol	Eubacterium ventriosum	0.266503	0.218464	0.22	0.71	-0.111268	0.207415	0.59	0.75
Stigmasterol	Evtepia gabavorous	0.186243	0.230901	0.42	0.83	0.679469	0.219429	0.002	0.03
Stigmasterol	Faecalibacillus faecis	-0.400813	0.187205	0.03	0.38	0.18616	0.17715	0.29	0.49
Stigmasterol	Faecalibacillus intestinalis	0.324757	0.23895	0.17	0.71	-0.628344	0.224986	0.005	0.05
Stigmasterol	Faecalibacterium SGB15315	0.127047	0.267789	0.64	0.94	-0.240775	0.25339	0.34	0.55
Stigmasterol	Faecalibacterium SGB15346	-0.183238	0.249382	0.46	0.86	-0.688436	0.232587	0.003	0.04
Stigmasterol	Faecalibacterium prausnitzii	0.311781	0.112058	0.005	0.32	-0.29431	0.109267	0.007	0.06
Stigmasterol	Faecalicatena fissicatena	-0.0633527	0.260687	0.81	0.97	-0.623645	0.246638	0.01	0.07
Stigmasterol	Firmicutes bacterium AF16 15	0.765962	0.232076	<0.001	0.19	-0.340062	0.22441	0.13	0.28
Stigmasterol	Flavonifractor plautii	0.0943053	0.238781	0.69	0.97	1.07839	0.226866	<0.001	<0.001
Stigmasterol	Fusicatenibacter saccharivorans	0.0220041	0.148617	0.88	0.98	0.0769573	0.142479	0.59	0.75
Stigmasterol	GGB13404 SGB14252	0.17828	0.171904	0.3	0.74	-0.355231	0.165633	0.03	0.12
Stigmasterol	GGB16040 SGB9347	0.0649785	0.21761	0.77	0.97	-0.409986	0.205384	0.05	0.15
Stigmasterol	GGB2653 SGB3574	-0.00222645	0.191771	0.99	0.99	0.158285	0.185884	0.39	0.6
Stigmasterol	GGB2970 SGB3952	0.197867	0.143201	0.17	0.71	-0.232217	0.137668	0.09	0.22
Stigmasterol	GGB2980 SGB3962	0.17216	0.134628	0.2	0.71	-0.072017	0.129659	0.58	0.74
Stigmasterol	GGB2982 SGB3964	0.1575	0.19215	0.41	0.83	-0.0897139	0.183269	0.62	0.78
Stigmasterol	GGB2998 SGB3988	0.286182	0.168515	0.09	0.54	-0.0098048	0.161893	0.95	0.98
Stigmasterol	GGB3005 SGB3996	0.484855	0.235881	0.04	0.4	0.102264	0.227939	0.65	0.79
Stigmasterol	GGB3109 SGB4643	0.0109593	0.225526	0.96	0.98	-0.78095	0.212101	<0.001	0.008
Stigmasterol	GGB3167 SGB4181	-0.016003	0.177638	0.93	0.98	-0.367379	0.166964	0.03	0.11
Stigmasterol	GGB3175 SGB4191	0.353947	0.210186	0.09	0.54	-0.42638	0.199517	0.03	0.12
Stigmasterol	GGB3256 SGB4303	0.515958	0.26208	0.05	0.44	-0.477408	0.247186	0.05	0.16
Stigmasterol	GGB3277 SGB4327	-0.120312	0.113268	0.29	0.73	-0.132366	0.108274	0.22	0.4
Stigmasterol	GGB3278 SGB4328	-0.129773	0.154578	0.4	0.82	-0.130985	0.146746	0.37	0.58
Stigmasterol	GGB32900 SGB53446	0.126672	0.184214	0.49	0.87	-0.116809	0.178622	0.51	0.69
Stigmasterol	GGB3304 SGB4367	-0.0842497	0.239183	0.72	0.97	-0.402144	0.222363	0.07	0.19
Stigmasterol	GGB3321 SGB4394	0.295166	0.158166	0.06	0.47	-0.373979	0.150904	0.01	0.07
Stigmasterol	GGB33469 SGB15236	0.319548	0.241446	0.19	0.71	-0.52252	0.225958	0.02	0.09
Stigmasterol	GGB33512 SGB15201	0.313787	0.189832	0.1	0.55	-0.191364	0.183486	0.3	0.49
Stigmasterol	GGB33512 SGB15203	0.14584	0.192033	0.45	0.85	-0.348211	0.181311	0.05	0.16
Stigmasterol	GGB33586 SGB53517	0.342536	0.176832	0.05	0.45	0.0564847	0.173304	0.74	0.86
Stigmasterol	GGB33928 SGB15225	-0.135046	0.185695	0.47	0.87	-0.132114	0.178843	0.46	0.64
Stigmasterol	GGB3475 SGB4638	-0.190578	0.161522	0.24	0.71	-0.396883	0.153181	0.01	0.06
Stigmasterol	GGB34797 SGB14322	0.0497739	0.153402	0.75	0.97	-0.0935999	0.144215	0.52	0.69
Stigmasterol	GGB3486 SGB4658	0.0588985	0.137981	0.67	0.97	-0.333442	0.130548	0.01	0.07
Stigmasterol	GGB3510 SGB4687	0.119766	0.15818	0.45	0.85	-0.308355	0.150911	0.04	0.14
Stigmasterol	GGB3537 SGB4727	0.0554968	0.148242	0.71	0.97	0.00478599	0.14347	0.97	0.98
Stigmasterol	GGB3548 SGB4744	0.338622	0.142678	0.02	0.33	0.221892	0.135418	0.1	0.24
Stigmasterol	GGB3570 SGB4777	-0.0492088	0.1608	0.76	0.97	-0.459809	0.153789	0.003	0.04
Stigmasterol	GGB3602 SGB4574	-0.266732	0.201913	0.19	0.71	0.600912	0.189035	0.001	0.03
Stigmasterol	GGB3612 SGB4882	-0.143725	0.231932	0.54	0.89	-0.391476	0.222071	0.08	0.2
Stigmasterol	GGB3614 SGB4886	0.097258	0.212638	0.65	0.94	-0.397895	0.199757	0.05	0.15
Stigmasterol	GGB3619 SGB4894	0.0536375	0.191349	0.78	0.97	-0.276449	0.179764	0.12	0.28
Stigmasterol	GGB36267 SGB14177	0.106947	0.175957	0.54	0.9	-0.220242	0.170158	0.2	0.37
Stigmasterol	GGB3653 SGB4964	0.0719204	0.212132	0.73	0.97	-0.748104	0.201137	<0.001	0.008
Stigmasterol	GGB3746 SGB5089	0.273324	0.253127	0.28	0.73	-0.403753	0.242871	0.1	0.23
Stigmasterol	GGB3819 SGB5184	0.379419	0.185563	0.04	0.4	0.83518	0.176763	<0.001	<0.001
Stigmasterol	GGB38744 SGB14842	-0.191993	0.162342	0.24	0.71	0.125117	0.159857	0.43	0.63
Stigmasterol	GGB42994 SGB4746	-0.0501275	0.20778	0.81	0.97	0.607021	0.197505	0.002	0.03
Stigmasterol	GGB45432 SGB63101	0.0333928	0.128857	0.8	0.97	-0.0597902	0.12491	0.63	0.78
Stigmasterol	GGB4566 SGB6305	0.155073	0.183383	0.4	0.82	-0.35029	0.173776	0.04	0.14
Stigmasterol	GGB4567 SGB6308	0.0325867	0.152885	0.83	0.97	-0.242527	0.143284	0.09	0.22
Stigmasterol	GGB4571 SGB6317	-0.000640356	0.136155	1	1	-0.164401	0.128411	0.2	0.38
Stigmasterol	GGB4745 SGB6571	-0.0707904	0.189906	0.71	0.97	-0.310476	0.178748	0.08	0.21
Stigmasterol	GGB47687 SGB2286	-0.0168923	0.203791	0.93	0.98	-0.345608	0.191094	0.07	0.19
Stigmasterol	GGB4802 SGB6641	0.0361524	0.147391	0.81	0.97	0.0630554	0.141926	0.66	0.8
Stigmasterol	GGB51139 SGB71360	-0.035079	0.125033	0.78	0.97	0.181452	0.120285	0.13	0.28
Stigmasterol	GGB51269 SGB5062	-0.388186	0.165074	0.02	0.33	-0.216449	0.159703	0.18	0.35
Stigmasterol	GGB51647 SGB4348	-0.0499764	0.210846	0.81	0.97	-0.293968	0.197878	0.14	0.29
Stigmasterol	GGB52130 SGB14966	0.00297834	0.16915	0.99	0.99	-0.0942702	0.163792	0.56	0.73
Stigmasterol	GGB5980 SGB8599	0.201409	0.158882	0.2	0.71	-0.00396652	0.149584	0.98	0.98
Stigmasterol	GGB6612 SGB9346	-0.0117	0.182225	0.95	0.98	0.207324	0.169022	0.22	0.4
Stigmasterol	GGB79630 SGB13983	0.0588932	0.188078	0.75	0.97	-0.265169	0.180049	0.14	0.3
Stigmasterol	GGB79734 SGB15291	0.597543	0.234561	0.01	0.32	-0.585146	0.222009	0.008	0.06
Stigmasterol	GGB79890 SGB14770	-0.157805	0.213287	0.46	0.86	-0.149968	0.198054	0.45	0.63
Stigmasterol	GGB79973 SGB14341	0.249055	0.219121	0.26	0.73	-0.0113071	0.206885	0.96	0.98
Stigmasterol	GGB79998 SGB48024	0.175865	0.187232	0.35	0.77	-0.269089	0.185805	0.15	0.31
Stigmasterol	GGB80011 SGB15265	-0.146003	0.227916	0.52	0.88	-0.147284	0.213653	0.49	0.67
Stigmasterol	GGB80011 SGB15267	0.371777	0.145924	0.01	0.32	-0.0318048	0.137679	0.82	0.91
Stigmasterol	GGB80140 SGB15224	-0.00562956	0.198061	0.98	0.99	-0.333022	0.185222	0.07	0.19
Stigmasterol	GGB9062 SGB13981	0.0409743	0.166114	0.81	0.97	-0.349002	0.159198	0.03	0.11
Stigmasterol	GGB9063 SGB13982	-0.0544073	0.204039	0.79	0.97	-0.249642	0.195193	0.2	0.38
Stigmasterol	GGB9109 SGB14042	-0.157006	0.162642	0.33	0.77	-0.392619	0.152981	0.01	0.07
Stigmasterol	GGB9115 SGB14048	0.16664	0.156399	0.29	0.73	-0.179122	0.148729	0.23	0.41
Stigmasterol	GGB9176 SGB14114	0.121586	0.236652	0.61	0.94	-0.402798	0.2208	0.07	0.19
Stigmasterol	GGB9210 SGB14149	0.0711153	0.133201	0.59	0.93	-0.151217	0.125712	0.23	0.41
Stigmasterol	GGB9211 SGB14151	0.158027	0.127975	0.22	0.71	-0.133293	0.119988	0.27	0.47
Stigmasterol	GGB9237 SGB14179	-0.048057	0.149866	0.75	0.97	-0.228747	0.143325	0.11	0.26
Stigmasterol	GGB9240 SGB14182	0.0295881	0.148728	0.84	0.97	-0.0908468	0.14205	0.52	0.7
Stigmasterol	GGB9296 SGB14253	-0.0792298	0.167828	0.64	0.94	-0.397135	0.159955	0.01	0.07
Stigmasterol	GGB9342 SGB14306	-0.0531054	0.268503	0.84	0.97	-0.568436	0.252911	0.02	0.1
Stigmasterol	GGB9345 SGB14311	0.0482446	0.233858	0.84	0.97	-0.439752	0.216936	0.04	0.14
Stigmasterol	GGB9350 SGB14317	-0.193956	0.191692	0.31	0.76	-0.357375	0.179845	0.05	0.15
Stigmasterol	GGB9453 SGB14844	-0.0537343	0.18499	0.77	0.97	-0.431948	0.175702	0.01	0.08
Stigmasterol	GGB9480 SGB14874	0.0769042	0.241923	0.75	0.97	0.329529	0.23019	0.15	0.31
Stigmasterol	GGB9495 SGB14892	-0.0929624	0.190966	0.63	0.94	-0.436425	0.18112	0.02	0.08
Stigmasterol	GGB9512 SGB14909	0.0941781	0.267153	0.72	0.97	0.4611	0.253242	0.07	0.19
Stigmasterol	GGB9522 SGB14921	0.0990284	0.102638	0.33	0.77	-0.0746462	0.0990677	0.45	0.63
Stigmasterol	GGB9524 SGB14923	0.208684	0.165893	0.21	0.71	0.338472	0.157219	0.03	0.12
Stigmasterol	GGB9524 SGB14924	0.351644	0.226286	0.12	0.6	-0.491871	0.211906	0.02	0.09
Stigmasterol	GGB9531 SGB14932	0.457529	0.184874	0.01	0.32	-0.195923	0.178959	0.27	0.47
Stigmasterol	GGB9534 SGB14937	-0.0793723	0.198252	0.69	0.97	-0.0114831	0.191186	0.95	0.98
Stigmasterol	GGB9551 SGB14958	-0.0745248	0.124416	0.55	0.9	-0.195171	0.117562	0.1	0.23
Stigmasterol	GGB9602 SGB15028	-0.107479	0.167464	0.52	0.88	-0.0201488	0.159248	0.9	0.96
Stigmasterol	GGB9602 SGB15031	0.0361066	0.262798	0.89	0.98	-0.560771	0.245877	0.02	0.1
Stigmasterol	GGB9614 SGB15049	0.483928	0.195815	0.01	0.32	-0.245096	0.191542	0.2	0.38
Stigmasterol	GGB9619 SGB15066	0.353288	0.17936	0.05	0.44	-0.0397119	0.172527	0.82	0.91
Stigmasterol	GGB9619 SGB15067	0.0360103	0.18751	0.85	0.97	-0.138951	0.178588	0.44	0.63
Stigmasterol	GGB9621 SGB15073	0.0268105	0.178682	0.88	0.98	-0.0608674	0.171484	0.72	0.84
Stigmasterol	GGB9627 SGB15081	0.110481	0.181138	0.54	0.9	0.11321	0.172193	0.51	0.69
Stigmasterol	GGB9634 SGB15093	-0.042372	0.207764	0.84	0.97	-0.185888	0.193469	0.34	0.54
Stigmasterol	GGB9635 SGB15106	-0.0885116	0.228576	0.7	0.97	-0.569562	0.21143	0.007	0.06
Stigmasterol	GGB9677 SGB15180	-0.226907	0.191507	0.24	0.71	-0.478158	0.180391	0.008	0.06
Stigmasterol	GGB9699 SGB15216	0.53558	0.238818	0.02	0.35	-0.0975396	0.228942	0.67	0.81
Stigmasterol	GGB9707 SGB15229	0.164119	0.21348	0.44	0.85	-0.387378	0.203977	0.06	0.17
Stigmasterol	GGB9708 SGB15233	-0.0870842	0.199328	0.66	0.96	-0.443743	0.185418	0.02	0.08
Stigmasterol	GGB9708 SGB15234	0.058167	0.294914	0.84	0.97	-0.611959	0.274695	0.03	0.11
Stigmasterol	GGB9712 SGB15244	-0.260403	0.218632	0.23	0.71	-0.839801	0.203484	<0.001	0.002
Stigmasterol	GGB9713 SGB15249	0.187308	0.286914	0.51	0.88	-0.70693	0.268643	0.009	0.06
Stigmasterol	GGB9719 SGB15273	-0.0221492	0.154207	0.89	0.98	0.052018	0.14798	0.73	0.84
Stigmasterol	GGB9747 SGB15356	0.134818	0.234502	0.57	0.91	-0.442699	0.218052	0.04	0.14
Stigmasterol	GGB9758 SGB15368	0.213747	0.242242	0.38	0.8	-0.669966	0.222006	0.003	0.03
Stigmasterol	GGB9759 SGB15370	0.114157	0.215072	0.6	0.93	0.217452	0.201298	0.28	0.48
Stigmasterol	GGB9760 SGB15373	0.546164	0.243263	0.02	0.35	-0.534726	0.228339	0.02	0.09
Stigmasterol	GGB9760 SGB15374	0.00882691	0.21112	0.97	0.98	-0.133951	0.194283	0.49	0.67
Stigmasterol	GGB9765 SGB15382	-0.0131684	0.181572	0.94	0.98	-0.189703	0.171671	0.27	0.47
Stigmasterol	GGB9770 SGB15390	0.26266	0.23582	0.27	0.73	-0.300604	0.224909	0.18	0.36
Stigmasterol	GGB9775 SGB15395	0.361572	0.20702	0.08	0.54	-0.399985	0.197396	0.04	0.14
Stigmasterol	GGB9781 SGB66170	0.179544	0.151052	0.23	0.71	-0.24914	0.145616	0.09	0.22
Stigmasterol	GGB9782 SGB15403	-0.0608042	0.146769	0.68	0.97	-0.315302	0.136725	0.02	0.09
Stigmasterol	GGB9818 SGB15459	0.17162	0.158606	0.28	0.73	-0.0455117	0.152146	0.76	0.88
Stigmasterol	Gemmiger SGB15295	0.617331	0.234907	0.009	0.32	-0.0538436	0.218785	0.81	0.91
Stigmasterol	Gemmiger SGB15299	0.306599	0.229603	0.18	0.71	-0.296533	0.216089	0.17	0.34
Stigmasterol	Gemmiger formicilis	-0.252698	0.293357	0.39	0.81	-0.465437	0.280144	0.1	0.23
Stigmasterol	Gordonibacter pamelaeae	0.0319104	0.162957	0.84	0.97	0.191322	0.155901	0.22	0.4
Stigmasterol	Gordonibacter urolithinfaciens	-0.0794833	0.135477	0.56	0.91	-0.0107971	0.129571	0.93	0.97
Stigmasterol	Haemophilus parainfluenzae	-0.0192175	0.137885	0.89	0.98	0.08015	0.136983	0.56	0.73
Stigmasterol	Holdemanella porci	0.177335	0.163714	0.28	0.73	0.15944	0.152654	0.3	0.49
Stigmasterol	Holdemania filiformis	0.0697616	0.16772	0.68	0.97	0.287168	0.16052	0.07	0.19
Stigmasterol	Hungatella hathewayi	-0.174547	0.158686	0.27	0.73	0.23573	0.156197	0.13	0.28
Stigmasterol	Hydrogenoanaerobacterium saccharovorans	-0.171336	0.194184	0.38	0.8	0.00239789	0.186248	0.99	0.99
Stigmasterol	Intestinimonas butyriciproducens	0.149708	0.219656	0.5	0.87	0.366676	0.210933	0.08	0.21
Stigmasterol	Intestinimonas massiliensis	0.0342615	0.198979	0.86	0.98	-0.185032	0.190579	0.33	0.54
Stigmasterol	Lachnospira eligens	0.346316	0.282459	0.22	0.71	-0.232296	0.26754	0.39	0.59
Stigmasterol	Lachnospira pectinoschiza	-0.0615809	0.273177	0.82	0.97	0.0568538	0.25961	0.83	0.91
Stigmasterol	Lachnospira sp NSJ 43	0.376383	0.275976	0.17	0.71	-0.748185	0.261041	0.004	0.04
Stigmasterol	Lachnospiraceae bacterium	0.0730148	0.227546	0.75	0.97	-0.339737	0.219672	0.12	0.27
Stigmasterol	Lachnospiraceae bacterium AM48 27BH	0.27723	0.216754	0.2	0.71	-0.535549	0.206184	0.009	0.06
Stigmasterol	Lachnospiraceae bacterium BX3	-0.0175094	0.130782	0.89	0.98	-0.379211	0.126185	0.003	0.03
Stigmasterol	Lachnospiraceae bacterium Marseille Q4251	0.234658	0.195447	0.23	0.71	-0.497639	0.186791	0.008	0.06
Stigmasterol	Lachnospiraceae bacterium OM04 12BH	-0.166663	0.188942	0.38	0.8	-0.414754	0.179182	0.02	0.09
Stigmasterol	Lacrimispora amygdalina	0.0100777	0.242058	0.97	0.98	-0.0508918	0.232568	0.83	0.91
Stigmasterol	Lacrimispora celerecrescens	0.0405198	0.248671	0.87	0.98	-0.31921	0.238053	0.18	0.35
Stigmasterol	Lawsonibacter asaccharolyticus	0.103784	0.165787	0.53	0.89	0.108624	0.162387	0.5	0.68
Stigmasterol	Lawsonibacter sp NSJ 51	0.229331	0.193886	0.24	0.71	-0.164218	0.18666	0.38	0.58
Stigmasterol	Longicatena caecimuris	-0.160803	0.171725	0.35	0.77	0.254109	0.164371	0.12	0.27
Stigmasterol	Massilistercora timonensis	-0.17681	0.151568	0.24	0.71	-0.19134	0.144517	0.19	0.36
Stigmasterol	Mediterraneibacter butyricigenes	0.0652703	0.181176	0.72	0.97	-0.103734	0.174304	0.55	0.72
Stigmasterol	Mediterraneibacter glycyrrhizinilyticus	0.0226146	0.181759	0.9	0.98	1.00539	0.173114	<0.001	<0.001
Stigmasterol	Methanobrevibacter smithii	-0.355777	0.236643	0.13	0.63	-0.718327	0.22171	0.001	0.03
Stigmasterol	Methylobacterium SGB15164	0.57895	0.225783	0.01	0.32	0.0431757	0.218022	0.84	0.92
Stigmasterol	Monoglobus pectinilyticus	0.00874365	0.294493	0.98	0.99	0.296999	0.277732	0.28	0.48
Stigmasterol	Negativibacillus massiliensis	-0.220975	0.221907	0.32	0.76	-0.405605	0.207955	0.05	0.16
Stigmasterol	Neglectibacter timonensis	-0.101174	0.21226	0.63	0.94	-0.11487	0.206218	0.58	0.74
Stigmasterol	Nitrosopumilus SGB14899	0.215441	0.205354	0.29	0.74	0.0330228	0.198136	0.87	0.94
Stigmasterol	Odoribacter splanchnicus	0.47111	0.204296	0.02	0.34	0.00843979	0.193152	0.97	0.98
Stigmasterol	Oscillibacter sp ER4	0.3505	0.288399	0.22	0.71	-0.845921	0.270148	0.002	0.03
Stigmasterol	Oscillospiraceae bacterium	0.0177185	0.209149	0.93	0.98	0.151115	0.197922	0.45	0.63
Stigmasterol	Oscillospiraceae bacterium BX1	0.148435	0.12239	0.23	0.71	-0.282849	0.116093	0.01	0.08
Stigmasterol	Oscillospiraceae bacterium Marseille Q3528	0.238688	0.186763	0.2	0.71	-0.361875	0.179627	0.04	0.14
Stigmasterol	Parabacteroides distasonis	-0.493095	0.22557	0.03	0.35	0.134328	0.211526	0.53	0.7
Stigmasterol	Parabacteroides goldsteinii	0.414778	0.221511	0.06	0.47	-0.382605	0.207569	0.07	0.18
Stigmasterol	Parabacteroides johnsonii	0.0913526	0.181791	0.62	0.94	0.133415	0.166399	0.42	0.62
Stigmasterol	Parabacteroides merdae	-0.102452	0.280083	0.71	0.97	0.140518	0.258451	0.59	0.75
Stigmasterol	Paraprevotella clara	0.142847	0.250539	0.57	0.91	0.187406	0.229402	0.41	0.62
Stigmasterol	Parasutterella SGB9260	-0.164282	0.203616	0.42	0.83	0.325581	0.184506	0.08	0.2
Stigmasterol	Parasutterella excrementihominis	-0.187478	0.265886	0.48	0.87	-0.492806	0.249724	0.05	0.15
Stigmasterol	Phascolarctobacterium SGB4573	0.0654929	0.206384	0.75	0.97	0.252924	0.196277	0.2	0.38
Stigmasterol	Phascolarctobacterium faecium	1.03377	0.31657	0.001	0.19	0.379736	0.299179	0.2	0.38
Stigmasterol	Phocaeicola SGB6473	-0.0369509	0.14815	0.8	0.97	-0.319539	0.139695	0.02	0.1
Stigmasterol	Phocaeicola dorei	-0.326775	0.394686	0.41	0.83	0.472577	0.362851	0.19	0.37
Stigmasterol	Phocaeicola massiliensis	-0.324277	0.265887	0.22	0.71	0.0968795	0.242169	0.69	0.82
Stigmasterol	Phocaeicola vulgatus	0.0220028	0.250458	0.93	0.98	-0.0972301	0.231125	0.67	0.81
Stigmasterol	Prevotella copri clade A	0.286098	0.249797	0.25	0.72	-0.0835166	0.238417	0.73	0.84
Stigmasterol	Pseudoruminococcus massiliensis	0.184598	0.153835	0.23	0.71	-0.230138	0.145259	0.11	0.26
Stigmasterol	Rheinheimera SGB14999	-0.134747	0.170958	0.43	0.85	0.1563	0.164598	0.34	0.55
Stigmasterol	Rikenellaceae bacterium	0.0327758	0.176194	0.85	0.98	0.324781	0.160993	0.04	0.14
Stigmasterol	Romboutsia timonensis	-0.0614392	0.150589	0.68	0.97	-0.370124	0.144445	0.01	0.07
Stigmasterol	Roseburia faecis	-0.0539882	0.275935	0.84	0.97	-0.206866	0.264624	0.43	0.63
Stigmasterol	Roseburia hominis	0.320338	0.210369	0.13	0.62	-0.138625	0.202644	0.49	0.67
Stigmasterol	Roseburia intestinalis	0.12925	0.262653	0.62	0.94	0.192211	0.252305	0.45	0.63
Stigmasterol	Roseburia inulinivorans	0.306513	0.246579	0.21	0.71	0.473622	0.23452	0.04	0.14
Stigmasterol	Roseburia sp AF02 12	0.0439982	0.291373	0.88	0.98	-0.574721	0.278998	0.04	0.14
Stigmasterol	Roseburia sp AM16 25	0.448096	0.186443	0.02	0.32	-0.278034	0.181719	0.13	0.28
Stigmasterol	Ruminococcaceae bacterium D5	-0.0805133	0.114495	0.48	0.87	-0.0107897	0.11041	0.92	0.97
Stigmasterol	Ruminococcus SGB4421	-0.0715379	0.192208	0.71	0.97	-0.258775	0.181842	0.15	0.32
Stigmasterol	Ruminococcus bicirculans	0.416584	0.292542	0.15	0.7	-0.794582	0.276045	0.004	0.04
Stigmasterol	Ruminococcus bromii	-0.0667672	0.342655	0.85	0.97	-0.702622	0.323601	0.03	0.12
Stigmasterol	Ruminococcus callidus	0.254561	0.182942	0.16	0.71	-0.19231	0.174123	0.27	0.47
Stigmasterol	Ruminococcus gnavus	-0.400832	0.269621	0.14	0.64	0.676434	0.259764	0.009	0.06
Stigmasterol	Ruminococcus lactaris	0.383629	0.291189	0.19	0.71	-0.425044	0.278561	0.13	0.28
Stigmasterol	Ruminococcus sp BSD2780120874 150323 B10	0.0355771	0.222603	0.87	0.98	-0.0781346	0.212489	0.71	0.84
Stigmasterol	Ruminococcus torques	0.208372	0.152856	0.17	0.71	0.116272	0.14966	0.44	0.63
Stigmasterol	Ruthenibacterium lactatiformans	-0.219638	0.160583	0.17	0.71	0.374389	0.156365	0.02	0.08
Stigmasterol	Sanguibacter SGB15121	-0.155173	0.142916	0.28	0.73	-0.329848	0.134551	0.01	0.08
Stigmasterol	Sellimonas intestinalis	-0.0975188	0.142179	0.49	0.87	-0.0242036	0.136757	0.86	0.93
Stigmasterol	Staphylococcus SGB6340	-0.119598	0.185384	0.52	0.88	-0.504955	0.174867	0.004	0.04
Stigmasterol	Streptococcus parasanguinis	-0.480589	0.197105	0.01	0.32	0.530316	0.188617	0.005	0.05
Stigmasterol	Streptococcus salivarius	-0.375465	0.217792	0.08	0.54	0.0914314	0.211804	0.67	0.8
Stigmasterol	Streptococcus thermophilus	-0.15361	0.167653	0.36	0.78	-0.135714	0.161957	0.4	0.61
Stigmasterol	Sutterella wadsworthensis	0.120355	0.243318	0.62	0.94	0.167623	0.223074	0.45	0.63
Stigmasterol	Veillonella dispar	-0.225959	0.13865	0.1	0.56	0.241267	0.134408	0.07	0.19
Stigmasterol	Vescimonas SGB15087	-0.277366	0.173719	0.11	0.57	-0.285412	0.163773	0.08	0.21
Stigmasterol	Vescimonas coprocola	0.454649	0.273183	0.1	0.54	0.126937	0.260053	0.63	0.78
Stigmasterol	Victivallis lenta	0.0819806	0.143341	0.57	0.91	-0.215451	0.137186	0.12	0.27
Stigmasterol	Waltera intestinalis	0.381586	0.272507	0.16	0.71	-0.362513	0.260158	0.16	0.33
Associations between phytosterol intake and microbial speceis were estimated from linear mixed models, adjusting for age, body mass index, and intakes of total fiber and total energy. Associations between microbial species and T2D metabolomic score were estimated from linear mixed models, adjusting for age, and body mass index. All analyses were conducted within each substudy, and pooled using fi…

## Sheet: Table S5
Table S5. Association between phytosterol intake, microbial enzymes, and T2D metabolomic score
				Phytosterol-species association				Species-T2D metabolomic score association
Phytosterol	Species	EC Number	Enzyme name	Coef	StdErr	P	FDR	Coef	StdErr	P	FDR
Total phytosterol	Candidatus Cibionibacter quicibialis	EC1.1.1.100	3-oxoacyl-[acyl-carrier-protein] reductase	0.487241	0.235796	0.04	0.1	-0.259157	0.144738	0.07	0.09
Total phytosterol	Candidatus Cibionibacter quicibialis	EC1.1.1.133	dTDP-4-dehydrorhamnose reductase	0.452096	0.211397	0.03	0.09	-0.284329	0.128539	0.03	0.06
Total phytosterol	Candidatus Cibionibacter quicibialis	EC1.1.1.157	3-hydroxybutyryl-CoA dehydrogenase	0.503544	0.240863	0.04	0.09	-0.353121	0.146909	0.02	0.05
Total phytosterol	Candidatus Cibionibacter quicibialis	EC1.1.1.169	2-dehydropantoate 2-reductase	0.261527	0.1864	0.16	0.25	-0.120692	0.113782	0.29	0.3
Total phytosterol	Candidatus Cibionibacter quicibialis	EC1.1.1.22	UDP-glucose 6-dehydrogenase	0.624407	0.269989	0.02	0.08	-0.431962	0.165072	0.009	0.05
Total phytosterol	Candidatus Cibionibacter quicibialis	EC1.1.1.23	Histidinol dehydrogenase	0.40018	0.183411	0.03	0.09	-0.272446	0.111529	0.01	0.05
Total phytosterol	Candidatus Cibionibacter quicibialis	EC1.1.1.267	1-deoxy-D-xylulose-5-phosphate reductoisomerase	0.276342	0.185732	0.14	0.22	-0.200766	0.112809	0.08	0.09
Total phytosterol	Candidatus Cibionibacter quicibialis	EC1.1.1.3	Homoserine dehydrogenase	0.34917	0.164843	0.03	0.09	-0.239068	0.100443	0.02	0.05
Total phytosterol	Candidatus Cibionibacter quicibialis	EC1.1.1.38	Malate dehydrogenase (oxaloacetate-decarboxylating)	0.297139	0.168798	0.08	0.14	-0.18729	0.102814	0.07	0.09
Total phytosterol	Candidatus Cibionibacter quicibialis	EC1.1.1.58	Tagaturonate reductase	0.561643	0.250082	0.02	0.09	-0.353811	0.152162	0.02	0.05
Total phytosterol	Candidatus Cibionibacter quicibialis	EC1.1.1.69	Gluconate 5-dehydrogenase	0.64147	0.242099	0.008	0.08	-0.338383	0.147508	0.02	0.05
Total phytosterol	Candidatus Cibionibacter quicibialis	EC1.1.1.77	Lactaldehyde reductase	0.674312	0.260041	0.01	0.08	-0.394565	0.157938	0.01	0.05
Total phytosterol	Candidatus Cibionibacter quicibialis	EC1.1.1.85	3-isopropylmalate dehydrogenase	0.369343	0.20483	0.07	0.13	-0.239973	0.124409	0.05	0.08
Total phytosterol	Candidatus Cibionibacter quicibialis	EC1.1.1.86	Ketol-acid reductoisomerase (NADP(+))	0.534289	0.225043	0.02	0.08	-0.31844	0.136925	0.02	0.05
Total phytosterol	Candidatus Cibionibacter quicibialis	EC1.1.1.94	Glycerol-3-phosphate dehydrogenase (NAD(P)(+))	0.259417	0.164772	0.12	0.19	-0.233192	0.100542	0.02	0.05
Total phytosterol	Candidatus Cibionibacter quicibialis	EC1.1.1.95	Phosphoglycerate dehydrogenase	0.338626	0.178331	0.06	0.11	-0.178417	0.108692	0.1	0.12
Total phytosterol	Candidatus Cibionibacter quicibialis	EC1.11.1.1	NADH peroxidase	0.508631	0.205903	0.01	0.08	-0.267391	0.125879	0.03	0.06
Total phytosterol	Candidatus Cibionibacter quicibialis	EC1.17.1.8	4-hydroxy-tetrahydrodipicolinate reductase	0.320663	0.163866	0.05	0.11	-0.192159	0.0999194	0.05	0.08
Total phytosterol	Candidatus Cibionibacter quicibialis	EC1.17.99.6	Epoxyqueuosine reductase	0.296689	0.165634	0.07	0.14	-0.263415	0.100947	0.009	0.05
Total phytosterol	Candidatus Cibionibacter quicibialis	EC1.2.1.11	Aspartate-semialdehyde dehydrogenase	0.314239	0.164658	0.06	0.11	-0.182596	0.10041	0.07	0.09
Total phytosterol	Candidatus Cibionibacter quicibialis	EC1.2.1.24	Succinate-semialdehyde dehydrogenase (NAD(+))	0.471475	0.216013	0.03	0.09	-0.278044	0.131131	0.03	0.06
Total phytosterol	Candidatus Cibionibacter quicibialis	EC1.2.1.38	N-acetyl-gamma-glutamyl-phosphate reductase	0.381635	0.177349	0.03	0.09	-0.206955	0.108097	0.06	0.08
Total phytosterol	Candidatus Cibionibacter quicibialis	EC1.2.1.41	Glutamate-5-semialdehyde dehydrogenase	0.392152	0.172111	0.02	0.08	-0.237809	0.104718	0.02	0.05
Total phytosterol	Candidatus Cibionibacter quicibialis	EC1.3.1.108	NO_NAME	0.680474	0.260863	0.009	0.08	-0.428374	0.159297	0.007	0.04
Total phytosterol	Candidatus Cibionibacter quicibialis	EC1.3.1.14	Dihydroorotate dehydrogenase (NAD(+))	0.566649	0.267318	0.03	0.09	-0.358978	0.162791	0.03	0.06
Total phytosterol	Candidatus Cibionibacter quicibialis	EC1.3.1.95	Acryloyl-CoA reductase (NADH)	0.535833	0.21852	0.01	0.08	-0.289468	0.134964	0.03	0.06
Total phytosterol	Candidatus Cibionibacter quicibialis	EC1.3.8.1	Short-chain acyl-CoA dehydrogenase	0.639052	0.238177	0.007	0.08	-0.366413	0.144976	0.01	0.05
Total phytosterol	Candidatus Cibionibacter quicibialis	EC1.4.1.4	Glutamate dehydrogenase (NADP(+))	0.446984	0.236079	0.06	0.11	-0.367399	0.143423	0.01	0.05
Total phytosterol	Candidatus Cibionibacter quicibialis	EC1.5.1.2	Pyrroline-5-carboxylate reductase	0.450992	0.196267	0.02	0.08	-0.273913	0.120104	0.02	0.05
Total phytosterol	Candidatus Cibionibacter quicibialis	EC1.5.1.7	Saccharopine dehydrogenase (NAD(+), L-lysine-forming)	0.475396	0.212999	0.03	0.09	-0.323864	0.129841	0.01	0.05
Total phytosterol	Candidatus Cibionibacter quicibialis	EC1.8.1.19	Sulfide dehydrogenase	0.448797	0.209427	0.03	0.09	-0.270928	0.127479	0.03	0.06
Total phytosterol	Candidatus Cibionibacter quicibialis	EC1.8.1.2	Assimilatory sulfite reductase (NADPH)	0.334651	0.189213	0.08	0.14	-0.250982	0.114832	0.03	0.06
Total phytosterol	Candidatus Cibionibacter quicibialis	EC1.97.1.4	[Formate-C-acetyltransferase]-activating enzyme	0.346864	0.178954	0.05	0.11	-0.261562	0.109311	0.02	0.05
Total phytosterol	Candidatus Cibionibacter quicibialis	EC2.1.1.13	Methionine synthase	0.312028	0.15669	0.05	0.1	-0.16857	0.0958295	0.08	0.1
Total phytosterol	Candidatus Cibionibacter quicibialis	EC2.1.1.166	23S rRNA (uridine(2552)-2'-O)-methyltransferase	0.496512	0.201864	0.01	0.08	-0.374761	0.12266	0.002	0.03
Total phytosterol	Candidatus Cibionibacter quicibialis	EC2.1.1.170	16S rRNA (guanine(527)-N(7))-methyltransferase	0.228324	0.170797	0.18	0.28	-0.196787	0.103857	0.06	0.08
Total phytosterol	Candidatus Cibionibacter quicibialis	EC2.1.1.189	23S rRNA (uracil(747)-C(5))-methyltransferase	0.315121	0.186999	0.09	0.16	-0.222726	0.112995	0.05	0.07
Total phytosterol	Candidatus Cibionibacter quicibialis	EC2.1.1.195	Cobalt-precorrin-5B (C(1))-methyltransferase	0.259259	0.160837	0.11	0.18	-0.201538	0.0975435	0.04	0.06
Total phytosterol	Candidatus Cibionibacter quicibialis	EC2.1.1.197	Malonyl-[acyl-carrier protein] O-methyltransferase	0.488417	0.201597	0.02	0.08	-0.268578	0.123519	0.03	0.06
Total phytosterol	Candidatus Cibionibacter quicibialis	EC2.1.1.198	16S rRNA (cytidine(1402)-2'-O)-methyltransferase	0.397086	0.180107	0.03	0.09	-0.2007	0.110401	0.07	0.09
Total phytosterol	Candidatus Cibionibacter quicibialis	EC2.1.1.199	16S rRNA (cytosine(1402)-N(4))-methyltransferase	0.422583	0.174262	0.02	0.08	-0.237832	0.106556	0.03	0.05
Total phytosterol	Candidatus Cibionibacter quicibialis	EC2.1.1.297	Peptide chain release factor N(5)-glutamine methyltransferase	0.297267	0.180421	0.1	0.17	-0.215624	0.109935	0.05	0.07
Total phytosterol	Candidatus Cibionibacter quicibialis	EC2.1.1.33	tRNA (guanine(46)-N(7))-methyltransferase	0.398304	0.180652	0.03	0.09	-0.235165	0.109744	0.03	0.06
Total phytosterol	Candidatus Cibionibacter quicibialis	EC2.1.1.37	DNA (cytosine-5-)-methyltransferase	0.504832	0.264034	0.06	0.11	-0.459234	0.160039	0.004	0.04
Total phytosterol	Candidatus Cibionibacter quicibialis	EC2.1.1.63	Methylated-DNA--[protein]-cysteine S-methyltransferase	0.340976	0.168678	0.04	0.1	-0.279369	0.103245	0.007	0.04
Total phytosterol	Candidatus Cibionibacter quicibialis	EC2.1.1.64	3-demethylubiquinol 3-O-methyltransferase	0.370252	0.243199	0.13	0.21	-0.234388	0.148366	0.11	0.13
Total phytosterol	Candidatus Cibionibacter quicibialis	EC2.1.1.72	Site-specific DNA-methyltransferase (adenine-specific)	0.552221	0.313316	0.08	0.14	-0.293838	0.190586	0.12	0.14
Total phytosterol	Candidatus Cibionibacter quicibialis	EC2.1.3.1	Methylmalonyl-CoA carboxytransferase	0.643802	0.265733	0.02	0.08	-0.397021	0.161315	0.01	0.05
Total phytosterol	Candidatus Cibionibacter quicibialis	EC2.1.3.2	Aspartate carbamoyltransferase	0.341293	0.166288	0.04	0.1	-0.154999	0.10202	0.13	0.14
Total phytosterol	Candidatus Cibionibacter quicibialis	EC2.1.3.3	Ornithine carbamoyltransferase	0.416507	0.208128	0.05	0.1	-0.284651	0.126417	0.02	0.05
Total phytosterol	Candidatus Cibionibacter quicibialis	EC2.2.1.1	Transketolase	0.256046	0.233599	0.27	0.41	-0.154426	0.14249	0.28	0.29
Total phytosterol	Candidatus Cibionibacter quicibialis	EC2.2.1.2	Transaldolase	0.499059	0.226451	0.03	0.09	-0.344942	0.138117	0.01	0.05
Total phytosterol	Candidatus Cibionibacter quicibialis	EC2.2.1.6	Acetolactate synthase	0.334145	0.176039	0.06	0.11	-0.246865	0.106853	0.02	0.05
Total phytosterol	Candidatus Cibionibacter quicibialis	EC2.2.1.7	1-deoxy-D-xylulose-5-phosphate synthase	0.323842	0.164215	0.05	0.1	-0.227896	0.0999869	0.02	0.05
Total phytosterol	Candidatus Cibionibacter quicibialis	EC2.3.1.179	Beta-ketoacyl-[acyl-carrier-protein] synthase II	0.467027	0.247357	0.06	0.12	-0.322392	0.151287	0.03	0.06
Total phytosterol	Candidatus Cibionibacter quicibialis	EC2.3.1.30	Serine O-acetyltransferase	0.358985	0.190918	0.06	0.12	-0.222721	0.11637	0.06	0.08
Total phytosterol	Candidatus Cibionibacter quicibialis	EC2.3.1.31	Homoserine O-acetyltransferase	0.325085	0.193648	0.09	0.16	-0.222452	0.117792	0.06	0.08
Total phytosterol	Candidatus Cibionibacter quicibialis	EC2.3.1.39	[Acyl-carrier-protein] S-malonyltransferase	0.4647	0.234262	0.05	0.1	-0.287696	0.143144	0.04	0.07
Total phytosterol	Candidatus Cibionibacter quicibialis	EC2.3.1.51	1-acylglycerol-3-phosphate O-acyltransferase	0.278427	0.173382	0.11	0.18	-0.191679	0.105564	0.07	0.09
Total phytosterol	Candidatus Cibionibacter quicibialis	EC2.3.1.54	Formate C-acetyltransferase	0.453273	0.21203	0.03	0.09	-0.296274	0.129218	0.02	0.05
Total phytosterol	Candidatus Cibionibacter quicibialis	EC2.3.1.8	Phosphate acetyltransferase	0.381419	0.168811	0.02	0.08	-0.153553	0.10381	0.14	0.15
Total phytosterol	Candidatus Cibionibacter quicibialis	EC2.3.1.9	Acetyl-CoA C-acetyltransferase	0.623081	0.258417	0.02	0.08	-0.3781	0.156988	0.02	0.05
Total phytosterol	Candidatus Cibionibacter quicibialis	EC2.3.2.3	Lysyltransferase	0.413208	0.183821	0.02	0.09	-0.264195	0.111827	0.02	0.05
Total phytosterol	Candidatus Cibionibacter quicibialis	EC2.3.3.13	2-isopropylmalate synthase	0.511423	0.228127	0.02	0.09	-0.370866	0.139673	0.008	0.05
Total phytosterol	Candidatus Cibionibacter quicibialis	EC2.4.1.1	Glycogen phosphorylase	0.600097	0.281604	0.03	0.09	-0.380401	0.171871	0.03	0.06
Total phytosterol	Candidatus Cibionibacter quicibialis	EC2.4.1.117	Dolichyl-phosphate beta-glucosyltransferase	0.370821	0.191126	0.05	0.11	-0.174655	0.115874	0.13	0.15
Total phytosterol	Candidatus Cibionibacter quicibialis	EC2.4.1.18	1,4-alpha-glucan branching enzyme	0.48073	0.233018	0.04	0.1	-0.29842	0.141615	0.04	0.06
Total phytosterol	Candidatus Cibionibacter quicibialis	EC2.4.1.21	Starch synthase	0.61007	0.25119	0.02	0.08	-0.403486	0.153501	0.009	0.05
Total phytosterol	Candidatus Cibionibacter quicibialis	EC2.4.1.211	1,3-beta-galactosyl-N-acetylhexosamine phosphorylase	0.447902	0.276479	0.11	0.18	-0.388107	0.168017	0.02	0.05
Total phytosterol	Candidatus Cibionibacter quicibialis	EC2.4.1.25	4-alpha-glucanotransferase	0.497959	0.247011	0.04	0.1	-0.332673	0.149505	0.03	0.05
Total phytosterol	Candidatus Cibionibacter quicibialis	EC2.4.2.1	Purine-nucleoside phosphorylase	0.342678	0.181931	0.06	0.12	-0.222522	0.1107	0.04	0.07
Total phytosterol	Candidatus Cibionibacter quicibialis	EC2.4.2.10	Orotate phosphoribosyltransferase	0.526746	0.212951	0.01	0.08	-0.303122	0.12976	0.02	0.05
Total phytosterol	Candidatus Cibionibacter quicibialis	EC2.4.2.14	Amidophosphoribosyltransferase	0.344099	0.178959	0.05	0.11	-0.263164	0.108651	0.02	0.05
Total phytosterol	Candidatus Cibionibacter quicibialis	EC2.4.2.21	Nicotinate-nucleotide--dimethylbenzimidazole phosphoribosyltransferase	0.285705	0.162489	0.08	0.14	-0.217137	0.0988301	0.03	0.06
Total phytosterol	Candidatus Cibionibacter quicibialis	EC2.4.2.4	Thymidine phosphorylase	0.350386	0.162051	0.03	0.09	-0.192652	0.0991914	0.05	0.08
Total phytosterol	Candidatus Cibionibacter quicibialis	EC2.4.2.7	Adenine phosphoribosyltransferase	0.439132	0.215926	0.04	0.1	-0.26292	0.131247	0.05	0.07
Total phytosterol	Candidatus Cibionibacter quicibialis	EC2.4.2.8	Hypoxanthine phosphoribosyltransferase	0.352859	0.176397	0.05	0.1	-0.182356	0.107804	0.09	0.11
Total phytosterol	Candidatus Cibionibacter quicibialis	EC2.4.99.17	S-adenosylmethionine:tRNA ribosyltransferase-isomerase	0.248832	0.166406	0.13	0.22	-0.1638	0.101728	0.11	0.12
Total phytosterol	Candidatus Cibionibacter quicibialis	EC2.5.1.145	NO_NAME	0.327709	0.171791	0.06	0.11	-0.25109	0.104594	0.02	0.05
Total phytosterol	Candidatus Cibionibacter quicibialis	EC2.5.1.16	Spermidine synthase	0.604896	0.234867	0.01	0.08	-0.352333	0.142919	0.01	0.05
Total phytosterol	Candidatus Cibionibacter quicibialis	EC2.5.1.19	3-phosphoshikimate 1-carboxyvinyltransferase	0.376774	0.181114	0.04	0.09	-0.236358	0.110082	0.03	0.06
Total phytosterol	Candidatus Cibionibacter quicibialis	EC2.5.1.3	Thiamine-phosphate diphosphorylase	0.373487	0.188819	0.05	0.1	-0.23932	0.115693	0.04	0.06
Total phytosterol	Candidatus Cibionibacter quicibialis	EC2.5.1.47	Cysteine synthase	0.406395	0.175153	0.02	0.08	-0.234495	0.106781	0.03	0.06
Total phytosterol	Candidatus Cibionibacter quicibialis	EC2.5.1.49	O-acetylhomoserine aminocarboxypropyltransferase	0.435232	0.209567	0.04	0.1	-0.265297	0.127988	0.04	0.06
Total phytosterol	Candidatus Cibionibacter quicibialis	EC2.5.1.54	3-deoxy-7-phosphoheptulonate synthase	0.495638	0.217574	0.02	0.08	-0.316558	0.132212	0.02	0.05
Total phytosterol	Candidatus Cibionibacter quicibialis	EC2.5.1.57	N-acylneuraminate-9-phosphate synthase	0.359454	0.175808	0.04	0.1	-0.183714	0.107032	0.09	0.1
Total phytosterol	Candidatus Cibionibacter quicibialis	EC2.5.1.6	Methionine adenosyltransferase	0.41469	0.248735	0.1	0.17	-0.336202	0.15123	0.03	0.05
Total phytosterol	Candidatus Cibionibacter quicibialis	EC2.6.1.1	Aspartate transaminase	0.30585	0.162055	0.06	0.12	-0.201056	0.0988253	0.04	0.07
Total phytosterol	Candidatus Cibionibacter quicibialis	EC2.6.1.11	Acetylornithine transaminase	0.371606	0.187492	0.05	0.1	-0.257262	0.114263	0.02	0.05
Total phytosterol	Candidatus Cibionibacter quicibialis	EC2.6.1.16	Glutamine--fructose-6-phosphate transaminase (isomerizing)	0.391503	0.187484	0.04	0.09	-0.22431	0.113906	0.05	0.07
Total phytosterol	Candidatus Cibionibacter quicibialis	EC2.6.1.42	Branched-chain-amino-acid transaminase	0.422203	0.181658	0.02	0.08	-0.238446	0.111052	0.03	0.06
Total phytosterol	Candidatus Cibionibacter quicibialis	EC2.6.1.52	Phosphoserine transaminase	0.361403	0.178677	0.04	0.1	-0.251005	0.108689	0.02	0.05
Total phytosterol	Candidatus Cibionibacter quicibialis	EC2.6.1.59	dTDP-4-amino-4,6-dideoxygalactose transaminase	0.367845	0.175385	0.04	0.09	-0.315868	0.106732	0.003	0.04
Total phytosterol	Candidatus Cibionibacter quicibialis	EC2.6.1.83	LL-diaminopimelate aminotransferase	0.45884	0.208077	0.03	0.09	-0.265881	0.126627	0.04	0.06
Total phytosterol	Candidatus Cibionibacter quicibialis	EC2.6.1.9	Histidinol-phosphate transaminase	0.465863	0.207924	0.03	0.09	-0.267445	0.126186	0.03	0.06
Total phytosterol	Candidatus Cibionibacter quicibialis	EC2.7.1.11	6-phosphofructokinase	0.561971	0.253444	0.03	0.09	-0.34044	0.153795	0.03	0.06
Total phytosterol	Candidatus Cibionibacter quicibialis	EC2.7.1.162	N-acetylhexosamine 1-kinase	0.335717	0.230094	0.14	0.23	-0.340633	0.139699	0.01	0.05
Total phytosterol	Candidatus Cibionibacter quicibialis	EC2.7.1.17	Xylulokinase	0.45821	0.232587	0.05	0.1	-0.27816	0.141532	0.05	0.07
Total phytosterol	Candidatus Cibionibacter quicibialis	EC2.7.1.191	NO_NAME	0.451949	0.175061	0.01	0.08	-0.171948	0.106967	0.11	0.12
Total phytosterol	Candidatus Cibionibacter quicibialis	EC2.7.1.201	NO_NAME	0.281558	0.235288	0.23	0.35	-0.332917	0.142193	0.02	0.05
Total phytosterol	Candidatus Cibionibacter quicibialis	EC2.7.1.25	Adenylyl-sulfate kinase	0.50837	0.24516	0.04	0.1	-0.350366	0.149127	0.02	0.05
Total phytosterol	Candidatus Cibionibacter quicibialis	EC2.7.1.30	Glycerol kinase	0.717283	0.272388	0.008	0.08	-0.391195	0.165216	0.02	0.05
Total phytosterol	Candidatus Cibionibacter quicibialis	EC2.7.1.33	Pantothenate kinase	0.524277	0.221224	0.02	0.08	-0.301824	0.134966	0.03	0.05
Total phytosterol	Candidatus Cibionibacter quicibialis	EC2.7.1.39	Homoserine kinase	0.284553	0.174553	0.1	0.18	-0.225039	0.106673	0.03	0.06
Total phytosterol	Candidatus Cibionibacter quicibialis	EC2.7.1.40	Pyruvate kinase	0.302348	0.179093	0.09	0.16	-0.22345	0.108251	0.04	0.06
Total phytosterol	Candidatus Cibionibacter quicibialis	EC2.7.1.48	Uridine kinase	0.384735	0.171749	0.03	0.09	-0.181639	0.104969	0.08	0.1
Total phytosterol	Candidatus Cibionibacter quicibialis	EC2.7.1.5	Rhamnulokinase	0.386522	0.221692	0.08	0.15	-0.305288	0.133894	0.02	0.05
Total phytosterol	Candidatus Cibionibacter quicibialis	EC2.7.1.69	Protein-N(pi)-phosphohistidine--sugar phosphotransferase	0.281558	0.235288	0.23	0.35	-0.332917	0.142193	0.02	0.05
Total phytosterol	Candidatus Cibionibacter quicibialis	EC2.7.1.90	Diphosphate--fructose-6-phosphate 1-phosphotransferase	0.578064	0.267325	0.03	0.09	-0.367809	0.162198	0.02	0.05
Total phytosterol	Candidatus Cibionibacter quicibialis	EC2.7.1.92	5-dehydro-2-deoxygluconokinase	0.522787	0.194719	0.007	0.08	-0.324324	0.119028	0.006	0.04
Total phytosterol	Candidatus Cibionibacter quicibialis	EC2.7.11.1	Non-specific serine/threonine protein kinase	0.425559	0.210569	0.04	0.1	-0.278001	0.128077	0.03	0.06
Total phytosterol	Candidatus Cibionibacter quicibialis	EC2.7.13.3	Histidine kinase	0.520665	0.228118	0.02	0.08	-0.338917	0.138432	0.01	0.05
Total phytosterol	Candidatus Cibionibacter quicibialis	EC2.7.2.1	Acetate kinase	0.602451	0.247335	0.01	0.08	-0.381855	0.149716	0.01	0.05
Total phytosterol	Candidatus Cibionibacter quicibialis	EC2.7.2.11	Glutamate 5-kinase	0.293287	0.170972	0.09	0.15	-0.244809	0.103853	0.02	0.05
Total phytosterol	Candidatus Cibionibacter quicibialis	EC2.7.2.3	Phosphoglycerate kinase	0.599614	0.245189	0.01	0.08	-0.377192	0.148555	0.01	0.05
Total phytosterol	Candidatus Cibionibacter quicibialis	EC2.7.2.4	Aspartate kinase	0.36045	0.163226	0.03	0.09	-0.234681	0.0999018	0.02	0.05
Total phytosterol	Candidatus Cibionibacter quicibialis	EC2.7.3.9	Phosphoenolpyruvate--protein phosphotransferase	0.284937	0.179153	0.11	0.19	-0.261106	0.108775	0.02	0.05
Total phytosterol	Candidatus Cibionibacter quicibialis	EC2.7.4.1	Polyphosphate kinase	0.293555	0.17203	0.09	0.16	-0.256125	0.104228	0.01	0.05
Total phytosterol	Candidatus Cibionibacter quicibialis	EC2.7.6.5	GTP diphosphokinase	0.30637	0.180934	0.09	0.16	-0.196369	0.109904	0.07	0.09
Total phytosterol	Candidatus Cibionibacter quicibialis	EC2.7.7.12	UDP-glucose--hexose-1-phosphate uridylyltransferase	0.34285	0.178447	0.05	0.11	-0.232839	0.108684	0.03	0.06
Total phytosterol	Candidatus Cibionibacter quicibialis	EC2.7.7.18	Nicotinate-nucleotide adenylyltransferase	0.409547	0.189127	0.03	0.09	-0.247526	0.115254	0.03	0.06
Total phytosterol	Candidatus Cibionibacter quicibialis	EC2.7.7.24	Glucose-1-phosphate thymidylyltransferase	0.328833	0.183711	0.07	0.14	-0.267539	0.111721	0.02	0.05
Total phytosterol	Candidatus Cibionibacter quicibialis	EC2.7.7.33	Glucose-1-phosphate cytidylyltransferase	0.351885	0.188498	0.06	0.12	-0.26516	0.114773	0.02	0.05
Total phytosterol	Candidatus Cibionibacter quicibialis	EC2.7.7.38	3-deoxy-manno-octulosonate cytidylyltransferase	0.388497	0.176536	0.03	0.09	-0.226003	0.107395	0.04	0.06
Total phytosterol	Candidatus Cibionibacter quicibialis	EC2.7.7.6	DNA-directed RNA polymerase	0.528841	0.261905	0.04	0.1	-0.371213	0.159425	0.02	0.05
Total phytosterol	Candidatus Cibionibacter quicibialis	EC2.7.7.60	2-C-methyl-D-erythritol 4-phosphate cytidylyltransferase	0.319858	0.157608	0.04	0.1	-0.21594	0.0961762	0.02	0.05
Total phytosterol	Candidatus Cibionibacter quicibialis	EC2.7.7.7	DNA-directed DNA polymerase	0.476185	0.237254	0.04	0.1	-0.315837	0.143938	0.03	0.06
Total phytosterol	Candidatus Cibionibacter quicibialis	EC2.7.7.72	CCA tRNA nucleotidyltransferase	0.360623	0.169991	0.03	0.09	-0.208108	0.103666	0.04	0.07
Total phytosterol	Candidatus Cibionibacter quicibialis	EC2.7.7.8	Polyribonucleotide nucleotidyltransferase	0.569254	0.263918	0.03	0.09	-0.349501	0.160956	0.03	0.06
Total phytosterol	Candidatus Cibionibacter quicibialis	EC2.7.7.87	L-threonylcarbamoyladenylate synthase	0.334197	0.167137	0.05	0.1	-0.170506	0.101821	0.09	0.11
Total phytosterol	Candidatus Cibionibacter quicibialis	EC2.7.8.26	Adenosylcobinamide-GDP ribazoletransferase	0.405757	0.211846	0.06	0.11	-0.188434	0.128581	0.14	0.16
Total phytosterol	Candidatus Cibionibacter quicibialis	EC2.7.8.5	CDP-diacylglycerol--glycerol-3-phosphate 3-phosphatidyltransferase	0.340167	0.169047	0.04	0.1	-0.154356	0.103307	0.14	0.15
Total phytosterol	Candidatus Cibionibacter quicibialis	EC2.7.8.7	Holo-[acyl-carrier-protein] synthase	0.26795	0.168211	0.11	0.19	-0.23862	0.102619	0.02	0.05
Total phytosterol	Candidatus Cibionibacter quicibialis	EC2.8.1.13	tRNA-uridine 2-sulfurtransferase	0.390763	0.182362	0.03	0.09	-0.265905	0.111221	0.02	0.05
Total phytosterol	Candidatus Cibionibacter quicibialis	EC3.1.11.6	Exodeoxyribonuclease VII	0.445236	0.194934	0.02	0.08	-0.267978	0.1191	0.02	0.05
Total phytosterol	Candidatus Cibionibacter quicibialis	EC3.1.12.1	5' to 3' exodeoxyribonuclease (nucleoside 3'-phosphate-forming)	0.442708	0.164201	0.007	0.08	-0.206173	0.100826	0.04	0.07
Total phytosterol	Candidatus Cibionibacter quicibialis	EC3.1.13.1	Exoribonuclease II	0.386839	0.1825	0.03	0.09	-0.214184	0.110869	0.05	0.08
Total phytosterol	Candidatus Cibionibacter quicibialis	EC3.1.21.3	Type I site-specific deoxyribonuclease	0.596258	0.278865	0.03	0.09	-0.34569	0.169625	0.04	0.07
Total phytosterol	Candidatus Cibionibacter quicibialis	EC3.1.22.4	Crossover junction endodeoxyribonuclease	0.341518	0.187642	0.07	0.13	-0.252087	0.114485	0.03	0.06
Total phytosterol	Candidatus Cibionibacter quicibialis	EC3.1.26.11	Ribonuclease Z	0.436796	0.20344	0.03	0.09	-0.270408	0.123289	0.03	0.06
Total phytosterol	Candidatus Cibionibacter quicibialis	EC3.1.26.3	Ribonuclease III	0.387491	0.188252	0.04	0.1	-0.282701	0.11466	0.01	0.05
Total phytosterol	Candidatus Cibionibacter quicibialis	EC3.1.26.5	Ribonuclease P	0.456139	0.200165	0.02	0.08	-0.230237	0.121817	0.06	0.08
Total phytosterol	Candidatus Cibionibacter quicibialis	EC3.1.3.11	Fructose-bisphosphatase	0.873013	0.299441	0.004	0.08	-0.432107	0.182997	0.02	0.05
Total phytosterol	Candidatus Cibionibacter quicibialis	EC3.1.3.15	Histidinol-phosphatase	0.351156	0.19297	0.07	0.13	-0.241709	0.117664	0.04	0.06
Total phytosterol	Candidatus Cibionibacter quicibialis	EC3.2.1.156	Oligosaccharide reducing-end xylanase	0.51215	0.26246	0.05	0.11	-0.248048	0.159757	0.12	0.14
Total phytosterol	Candidatus Cibionibacter quicibialis	EC3.2.1.21	Beta-glucosidase	0.549713	0.25107	0.03	0.09	-0.321324	0.152234	0.03	0.06
Total phytosterol	Candidatus Cibionibacter quicibialis	EC3.2.1.23	Beta-galactosidase	0.498105	0.237553	0.04	0.09	-0.29482	0.143941	0.04	0.07
Total phytosterol	Candidatus Cibionibacter quicibialis	EC3.2.1.26	Beta-fructofuranosidase	0.397477	0.197097	0.04	0.1	-0.268729	0.119912	0.03	0.05
Total phytosterol	Candidatus Cibionibacter quicibialis	EC3.2.1.37	Xylan 1,4-beta-xylosidase	0.517893	0.214211	0.02	0.08	-0.298625	0.130615	0.02	0.05
Total phytosterol	Candidatus Cibionibacter quicibialis	EC3.2.1.40	Alpha-L-rhamnosidase	0.287203	0.164758	0.08	0.15	-0.201119	0.10019	0.04	0.07
Total phytosterol	Candidatus Cibionibacter quicibialis	EC3.2.1.52	Beta-N-acetylhexosaminidase	0.359719	0.176688	0.04	0.1	-0.262309	0.107753	0.01	0.05
Total phytosterol	Candidatus Cibionibacter quicibialis	EC3.2.1.86	6-phospho-beta-glucosidase	0.394178	0.171266	0.02	0.08	-0.168265	0.10466	0.11	0.12
Total phytosterol	Candidatus Cibionibacter quicibialis	EC3.2.1.93	Alpha,alpha-phosphotrehalase	0.402791	0.234085	0.09	0.15	-0.347363	0.141699	0.01	0.05
Total phytosterol	Candidatus Cibionibacter quicibialis	EC3.2.2.31	NO_NAME	0.249879	0.16119	0.12	0.2	-0.213327	0.098091	0.03	0.06
Total phytosterol	Candidatus Cibionibacter quicibialis	EC3.2.2.9	Adenosylhomocysteine nucleosidase	0.400829	0.172373	0.02	0.08	-0.207782	0.105114	0.05	0.07
Total phytosterol	Candidatus Cibionibacter quicibialis	EC3.2.2.n1	Cytokinin riboside 5'-monophosphate phosphoribohydrolase	0.484382	0.203125	0.02	0.08	-0.299812	0.123281	0.02	0.05
Total phytosterol	Candidatus Cibionibacter quicibialis	EC3.4.11.18	Methionyl aminopeptidase	0.336441	0.183403	0.07	0.13	-0.272379	0.111706	0.01	0.05
Total phytosterol	Candidatus Cibionibacter quicibialis	EC3.4.11.4	Tripeptide aminopeptidase	0.613355	0.25389	0.02	0.08	-0.389918	0.154847	0.01	0.05
Total phytosterol	Candidatus Cibionibacter quicibialis	EC3.4.13.19	Membrane dipeptidase	0.361719	0.193584	0.06	0.12	-0.269337	0.117859	0.02	0.05
Total phytosterol	Candidatus Cibionibacter quicibialis	EC3.4.13.21	Dipeptidase E	0.359891	0.149859	0.02	0.08	-0.233658	0.0928478	0.01	0.05
Total phytosterol	Candidatus Cibionibacter quicibialis	EC3.4.17.19	Carboxypeptidase Taq	0.456805	0.18928	0.02	0.08	-0.250602	0.114829	0.03	0.06
Total phytosterol	Candidatus Cibionibacter quicibialis	EC3.4.19.3	Pyroglutamyl-peptidase I	0.417746	0.253112	0.1	0.17	-0.381657	0.154363	0.01	0.05
Total phytosterol	Candidatus Cibionibacter quicibialis	EC3.4.21.89	Signal peptidase I	0.431069	0.23873	0.07	0.13	-0.252036	0.144964	0.08	0.1
Total phytosterol	Candidatus Cibionibacter quicibialis	EC3.5.1.2	Glutaminase	0.453828	0.202866	0.03	0.09	-0.291805	0.123343	0.02	0.05
Total phytosterol	Candidatus Cibionibacter quicibialis	EC3.5.1.25	N-acetylglucosamine-6-phosphate deacetylase	0.247238	0.16738	0.14	0.22	-0.248435	0.101327	0.01	0.05
Total phytosterol	Candidatus Cibionibacter quicibialis	EC3.5.1.88	Peptide deformylase	0.372223	0.209481	0.08	0.14	-0.250022	0.127325	0.05	0.07
Total phytosterol	Candidatus Cibionibacter quicibialis	EC3.5.2.3	Dihydroorotase	0.29245	0.17361	0.09	0.16	-0.192082	0.105919	0.07	0.09
Total phytosterol	Candidatus Cibionibacter quicibialis	EC3.5.2.9	5-oxoprolinase (ATP-hydrolyzing)	0.604722	0.270684	0.03	0.09	-0.365877	0.16478	0.03	0.05
Total phytosterol	Candidatus Cibionibacter quicibialis	EC3.5.3.11	Agmatinase	0.495786	0.244861	0.04	0.1	-0.316315	0.14975	0.03	0.06
Total phytosterol	Candidatus Cibionibacter quicibialis	EC3.5.4.33	tRNA(adenine(34)) deaminase	0.311865	0.171658	0.07	0.13	-0.150852	0.104995	0.15	0.16
Total phytosterol	Candidatus Cibionibacter quicibialis	EC3.5.4.5	Cytidine deaminase	0.31223	0.177406	0.08	0.14	-0.141242	0.108697	0.19	0.21
Total phytosterol	Candidatus Cibionibacter quicibialis	EC3.5.99.10	2-iminobutanoate/2-iminopropanoate deaminase	0.441497	0.208071	0.03	0.09	-0.263654	0.127358	0.04	0.06
Total phytosterol	Candidatus Cibionibacter quicibialis	EC3.5.99.6	Glucosamine-6-phosphate deaminase	0.350268	0.170942	0.04	0.1	-0.168406	0.104075	0.11	0.12
Total phytosterol	Candidatus Cibionibacter quicibialis	EC3.6.1.23	dUTP diphosphatase	0.278061	0.206374	0.18	0.28	-0.325511	0.124688	0.009	0.05
Total phytosterol	Candidatus Cibionibacter quicibialis	EC3.6.1.27	Undecaprenyl-diphosphate phosphatase	0.426212	0.210036	0.04	0.1	-0.289633	0.127974	0.02	0.05
Total phytosterol	Candidatus Cibionibacter quicibialis	EC3.6.1.3	Adenosinetriphosphatase	0.244945	0.155597	0.12	0.19	-0.198102	0.094972	0.04	0.06
Total phytosterol	Candidatus Cibionibacter quicibialis	EC3.6.1.31	Phosphoribosyl-ATP diphosphatase	0.681673	0.279932	0.01	0.08	-0.426329	0.170023	0.01	0.05
Total phytosterol	Candidatus Cibionibacter quicibialis	EC3.6.1.66	XTP/dITP diphosphatase	0.376486	0.192958	0.05	0.11	-0.210209	0.117901	0.07	0.09
Total phytosterol	Candidatus Cibionibacter quicibialis	EC3.6.1.9	Nucleotide diphosphatase	0.484121	0.22404	0.03	0.09	-0.306008	0.136054	0.02	0.05
Total phytosterol	Candidatus Cibionibacter quicibialis	EC3.6.3.14	H(+)-transporting two-sector ATPase	0.66991	0.257423	0.009	0.08	-0.389536	0.156442	0.01	0.05
Total phytosterol	Candidatus Cibionibacter quicibialis	EC3.6.3.17	Monosaccharide-transporting ATPase	0.694804	0.294019	0.02	0.08	-0.411379	0.178128	0.02	0.05
Total phytosterol	Candidatus Cibionibacter quicibialis	EC3.6.3.20	Glycerol-3-phosphate-transporting ATPase	0.603045	0.292741	0.04	0.1	-0.453196	0.177177	0.01	0.05
Total phytosterol	Candidatus Cibionibacter quicibialis	EC3.6.3.25	Sulfate-transporting ATPase	0.443542	0.193824	0.02	0.08	-0.323367	0.118656	0.006	0.04
Total phytosterol	Candidatus Cibionibacter quicibialis	EC3.6.3.28	Phosphonate-transporting ATPase	0.504654	0.249596	0.04	0.1	-0.300033	0.152298	0.05	0.07
Total phytosterol	Candidatus Cibionibacter quicibialis	EC3.6.3.31	Polyamine-transporting ATPase	0.326998	0.168206	0.05	0.11	-0.201356	0.102897	0.05	0.07
Total phytosterol	Candidatus Cibionibacter quicibialis	EC3.6.3.36	Taurine-transporting ATPase	0.241124	0.166886	0.15	0.24	-0.201622	0.101926	0.05	0.07
Total phytosterol	Candidatus Cibionibacter quicibialis	EC3.6.3.41	Heme-transporting ATPase	0.423093	0.18292	0.02	0.08	-0.248518	0.111006	0.03	0.05
Total phytosterol	Candidatus Cibionibacter quicibialis	EC3.6.3.44	Xenobiotic-transporting ATPase	0.472201	0.187057	0.01	0.08	-0.314034	0.114149	0.006	0.04
Total phytosterol	Candidatus Cibionibacter quicibialis	EC3.6.3.5	Zinc-exporting ATPase	0.338621	0.190704	0.08	0.14	-0.204047	0.115649	0.08	0.1
Total phytosterol	Candidatus Cibionibacter quicibialis	EC3.6.4.12	DNA helicase	0.706876	0.294923	0.02	0.08	-0.451392	0.179173	0.01	0.05
Total phytosterol	Candidatus Cibionibacter quicibialis	EC3.6.4.13	RNA helicase	0.465418	0.236157	0.05	0.1	-0.327328	0.14313	0.02	0.05
Total phytosterol	Candidatus Cibionibacter quicibialis	EC3.6.4.3	Microtubule-severing ATPase	0.370444	0.17033	0.03	0.09	-0.206317	0.103635	0.05	0.07
Total phytosterol	Candidatus Cibionibacter quicibialis	EC3.6.5.3	Protein-synthesizing GTPase	0.50924	0.235306	0.03	0.09	-0.355743	0.142981	0.01	0.05
Total phytosterol	Candidatus Cibionibacter quicibialis	EC4.1.1.19	Arginine decarboxylase	0.658478	0.251021	0.009	0.08	-0.393706	0.152869	0.01	0.05
Total phytosterol	Candidatus Cibionibacter quicibialis	EC4.1.1.3	Oxaloacetate decarboxylase	0.643802	0.265733	0.02	0.08	-0.397021	0.161315	0.01	0.05
Total phytosterol	Candidatus Cibionibacter quicibialis	EC4.1.1.36	Phosphopantothenoylcysteine decarboxylase	0.315682	0.160749	0.05	0.11	-0.234856	0.0977325	0.02	0.05
Total phytosterol	Candidatus Cibionibacter quicibialis	EC4.1.1.49	Phosphoenolpyruvate carboxykinase (ATP)	0.668447	0.275129	0.02	0.08	-0.402813	0.167868	0.02	0.05
Total phytosterol	Candidatus Cibionibacter quicibialis	EC4.1.2.13	Fructose-bisphosphate aldolase	0.478364	0.199751	0.02	0.08	-0.297942	0.121477	0.01	0.05
Total phytosterol	Candidatus Cibionibacter quicibialis	EC4.1.2.17	L-fuculose-phosphate aldolase	0.371178	0.243169	0.13	0.21	-0.344934	0.147776	0.02	0.05
Total phytosterol	Candidatus Cibionibacter quicibialis	EC4.1.2.19	Rhamnulose-1-phosphate aldolase	0.525984	0.241661	0.03	0.09	-0.358012	0.147738	0.02	0.05
Total phytosterol	Candidatus Cibionibacter quicibialis	EC4.1.2.4	Deoxyribose-phosphate aldolase	0.483996	0.248908	0.05	0.11	-0.286496	0.151341	0.06	0.08
Total phytosterol	Candidatus Cibionibacter quicibialis	EC4.1.2.9	Phosphoketolase	0.410255	0.214835	0.06	0.11	-0.285618	0.130961	0.03	0.06
Total phytosterol	Candidatus Cibionibacter quicibialis	EC4.2.1.10	3-dehydroquinate dehydratase	0.423829	0.213142	0.05	0.1	-0.27995	0.129481	0.03	0.06
Total phytosterol	Candidatus Cibionibacter quicibialis	EC4.2.1.11	Phosphopyruvate hydratase	0.342808	0.177597	0.05	0.11	-0.184256	0.10826	0.09	0.11
Total phytosterol	Candidatus Cibionibacter quicibialis	EC4.2.1.136	ADP-dependent NAD(P)H-hydrate dehydratase	0.354922	0.180067	0.05	0.1	-0.257316	0.109652	0.02	0.05
Total phytosterol	Candidatus Cibionibacter quicibialis	EC4.2.1.19	Imidazoleglycerol-phosphate dehydratase	0.258698	0.176586	0.14	0.23	-0.184369	0.10773	0.09	0.11
Total phytosterol	Candidatus Cibionibacter quicibialis	EC4.2.1.2	Fumarate hydratase	0.253503	0.176288	0.15	0.24	-0.262223	0.107498	0.01	0.05
Total phytosterol	Candidatus Cibionibacter quicibialis	EC4.2.1.33	3-isopropylmalate dehydratase	0.650984	0.285635	0.02	0.08	-0.373407	0.173672	0.03	0.06
Total phytosterol	Candidatus Cibionibacter quicibialis	EC4.2.1.46	dTDP-glucose 4,6-dehydratase	0.53295	0.234358	0.02	0.08	-0.359457	0.142282	0.01	0.05
Total phytosterol	Candidatus Cibionibacter quicibialis	EC4.2.1.47	GDP-mannose 4,6-dehydratase	0.442233	0.188399	0.02	0.08	-0.263614	0.114555	0.02	0.05
Total phytosterol	Candidatus Cibionibacter quicibialis	EC4.2.1.55	3-hydroxybutyryl-CoA dehydratase	0.591349	0.240722	0.01	0.08	-0.381377	0.146786	0.009	0.05
Total phytosterol	Candidatus Cibionibacter quicibialis	EC4.2.1.59	3-hydroxyacyl-[acyl-carrier-protein] dehydratase	0.374939	0.222778	0.09	0.16	-0.231598	0.136129	0.09	0.11
Total phytosterol	Candidatus Cibionibacter quicibialis	EC4.2.1.8	Mannonate dehydratase	0.625366	0.241727	0.01	0.08	-0.358497	0.14736	0.01	0.05
Total phytosterol	Candidatus Cibionibacter quicibialis	EC4.2.1.9	Dihydroxy-acid dehydratase	0.535507	0.230694	0.02	0.08	-0.375897	0.140146	0.007	0.04
Total phytosterol	Candidatus Cibionibacter quicibialis	EC4.2.3.3	Methylglyoxal synthase	0.480296	0.208611	0.02	0.08	-0.303458	0.127525	0.02	0.05
Total phytosterol	Candidatus Cibionibacter quicibialis	EC4.2.3.4	3-dehydroquinate synthase	0.387139	0.187399	0.04	0.1	-0.211823	0.11464	0.06	0.09
Total phytosterol	Candidatus Cibionibacter quicibialis	EC4.2.3.5	Chorismate synthase	0.383925	0.179502	0.03	0.09	-0.234766	0.109603	0.03	0.06
Total phytosterol	Candidatus Cibionibacter quicibialis	EC4.3.1.19	Threonine ammonia-lyase	0.412633	0.202413	0.04	0.1	-0.284478	0.122807	0.02	0.05
Total phytosterol	Candidatus Cibionibacter quicibialis	EC4.3.2.1	Argininosuccinate lyase	0.664563	0.284943	0.02	0.08	-0.366332	0.173948	0.04	0.06
Total phytosterol	Candidatus Cibionibacter quicibialis	EC4.3.2.10	NO_NAME	0.625656	0.300418	0.04	0.09	-0.355389	0.182369	0.05	0.07
Total phytosterol	Candidatus Cibionibacter quicibialis	EC4.3.2.2	Adenylosuccinate lyase	0.475881	0.21969	0.03	0.09	-0.321001	0.133438	0.02	0.05
Total phytosterol	Candidatus Cibionibacter quicibialis	EC4.3.3.7	4-hydroxy-tetrahydrodipicolinate synthase	0.335907	0.168806	0.05	0.1	-0.257854	0.102921	0.01	0.05
Total phytosterol	Candidatus Cibionibacter quicibialis	EC4.4.1.21	S-ribosylhomocysteine lyase	0.450098	0.197048	0.02	0.08	-0.21172	0.120917	0.08	0.1
Total phytosterol	Candidatus Cibionibacter quicibialis	EC5.1.1.1	Alanine racemase	0.341177	0.191361	0.07	0.14	-0.252117	0.115898	0.03	0.06
Total phytosterol	Candidatus Cibionibacter quicibialis	EC5.1.1.3	Glutamate racemase	0.288812	0.158938	0.07	0.13	-0.206977	0.0968198	0.03	0.06
Total phytosterol	Candidatus Cibionibacter quicibialis	EC5.1.1.7	Diaminopimelate epimerase	0.350425	0.180302	0.05	0.11	-0.231294	0.110364	0.04	0.06
Total phytosterol	Candidatus Cibionibacter quicibialis	EC5.1.3.1	Ribulose-phosphate 3-epimerase	0.379254	0.17473	0.03	0.09	-0.265852	0.106623	0.01	0.05
Total phytosterol	Candidatus Cibionibacter quicibialis	EC5.1.3.13	dTDP-4-dehydrorhamnose 3,5-epimerase	0.453531	0.192677	0.02	0.08	-0.257057	0.11781	0.03	0.06
Total phytosterol	Candidatus Cibionibacter quicibialis	EC5.1.3.14	UDP-N-acetylglucosamine 2-epimerase (non-hydrolyzing)	0.466106	0.214848	0.03	0.09	-0.258963	0.130095	0.05	0.07
Total phytosterol	Candidatus Cibionibacter quicibialis	EC5.1.3.2	UDP-glucose 4-epimerase	0.644138	0.259455	0.01	0.08	-0.40433	0.15781	0.01	0.05
Total phytosterol	Candidatus Cibionibacter quicibialis	EC5.1.3.3	Aldose 1-epimerase	0.499086	0.193046	0.01	0.08	-0.228352	0.117586	0.05	0.08
Total phytosterol	Candidatus Cibionibacter quicibialis	EC5.1.3.4	L-ribulose-5-phosphate 4-epimerase	0.445658	0.259889	0.09	0.15	-0.408665	0.157834	0.01	0.05
Total phytosterol	Candidatus Cibionibacter quicibialis	EC5.2.1.8	Peptidylprolyl isomerase	0.562195	0.276373	0.04	0.1	-0.313934	0.167437	0.06	0.08
Total phytosterol	Candidatus Cibionibacter quicibialis	EC5.3.1.1	Triose-phosphate isomerase	0.447986	0.236974	0.06	0.12	-0.307908	0.144661	0.03	0.06
Total phytosterol	Candidatus Cibionibacter quicibialis	EC5.3.1.12	Glucuronate isomerase	0.580501	0.232537	0.01	0.08	-0.411693	0.141597	0.004	0.04
Total phytosterol	Candidatus Cibionibacter quicibialis	EC5.3.1.16	isomerase	0.453907	0.255496	0.08	0.14	-0.28407	0.154233	0.07	0.09
Total phytosterol	Candidatus Cibionibacter quicibialis	EC5.3.1.17	5-dehydro-4-deoxy-D-glucuronate isomerase	0.312882	0.180116	0.08	0.15	-0.260676	0.10976	0.02	0.05
Total phytosterol	Candidatus Cibionibacter quicibialis	EC5.3.1.23	S-methyl-5-thioribose-1-phosphate isomerase	0.358985	0.190918	0.06	0.12	-0.222721	0.11637	0.06	0.08
Total phytosterol	Candidatus Cibionibacter quicibialis	EC5.3.1.25	L-fucose isomerase	0.513334	0.267699	0.06	0.11	-0.408749	0.163002	0.01	0.05
Total phytosterol	Candidatus Cibionibacter quicibialis	EC5.3.1.3	D-arabinose isomerase	0.513334	0.267699	0.06	0.11	-0.408749	0.163002	0.01	0.05
Total phytosterol	Candidatus Cibionibacter quicibialis	EC5.3.1.4	L-arabinose isomerase	0.438856	0.264536	0.1	0.17	-0.310173	0.160692	0.05	0.08
Total phytosterol	Candidatus Cibionibacter quicibialis	EC5.4.2.10	Phosphoglucosamine mutase	0.320383	0.189925	0.09	0.16	-0.267674	0.115172	0.02	0.05
Total phytosterol	Candidatus Cibionibacter quicibialis	EC5.4.2.2	Phosphoglucomutase (alpha-D-glucose-1,6-bisphosphate-dependent)	0.44539	0.252869	0.08	0.14	-0.561124	0.15333	<0.001	0.01
Total phytosterol	Candidatus Cibionibacter quicibialis	EC5.4.2.7	Phosphopentomutase	0.324321	0.163657	0.05	0.1	-0.223451	0.0996892	0.02	0.05
Total phytosterol	Candidatus Cibionibacter quicibialis	EC5.4.99.12	tRNA pseudouridine(38-40) synthase	0.420602	0.190903	0.03	0.09	-0.304172	0.115738	0.009	0.05
Total phytosterol	Candidatus Cibionibacter quicibialis	EC5.4.99.16	Maltose alpha-D-glucosyltransferase	0.492267	0.23087	0.03	0.09	-0.379118	0.141674	0.007	0.04
Total phytosterol	Candidatus Cibionibacter quicibialis	EC5.4.99.18	5-(carboxyamino)imidazole ribonucleotide mutase	0.351646	0.207651	0.09	0.16	-0.292261	0.126485	0.02	0.05
Total phytosterol	Candidatus Cibionibacter quicibialis	EC5.4.99.61	Precorrin-8X methylmutase	0.261403	0.184906	0.16	0.25	-0.251763	0.112651	0.03	0.05
Total phytosterol	Candidatus Cibionibacter quicibialis	EC5.4.99.9	UDP-galactopyranose mutase	0.296685	0.218336	0.17	0.27	-0.309171	0.132666	0.02	0.05
Total phytosterol	Candidatus Cibionibacter quicibialis	EC5.6.2.1	NO_NAME	0.616846	0.207098	0.003	0.08	-0.39883	0.12671	0.002	0.03
Total phytosterol	Candidatus Cibionibacter quicibialis	EC5.6.2.3	NO_NAME	0.699921	0.30182	0.02	0.08	-0.40738	0.182899	0.03	0.05
Total phytosterol	Candidatus Cibionibacter quicibialis	EC5.99.1.2	DNA topoisomerase	0.614355	0.203374	0.003	0.08	-0.402022	0.124433	0.001	0.03
Total phytosterol	Candidatus Cibionibacter quicibialis	EC6.1.1.10	Methionine--tRNA ligase	0.410857	0.183878	0.03	0.09	-0.28375	0.111796	0.01	0.05
Total phytosterol	Candidatus Cibionibacter quicibialis	EC6.1.1.11	Serine--tRNA ligase	0.51378	0.215627	0.02	0.08	-0.362078	0.131517	0.006	0.04
Total phytosterol	Candidatus Cibionibacter quicibialis	EC6.1.1.12	Aspartate--tRNA ligase	0.535313	0.231406	0.02	0.08	-0.341722	0.141315	0.02	0.05
Total phytosterol	Candidatus Cibionibacter quicibialis	EC6.1.1.14	Glycine--tRNA ligase	0.567609	0.262949	0.03	0.09	-0.406221	0.159461	0.01	0.05
Total phytosterol	Candidatus Cibionibacter quicibialis	EC6.1.1.15	Proline--tRNA ligase	0.445866	0.204311	0.03	0.09	-0.318185	0.124168	0.01	0.05
Total phytosterol	Candidatus Cibionibacter quicibialis	EC6.1.1.18	Glutamine--tRNA ligase	0.440233	0.182393	0.02	0.08	-0.242917	0.111865	0.03	0.06
Total phytosterol	Candidatus Cibionibacter quicibialis	EC6.1.1.22	Asparagine--tRNA ligase	0.725081	0.288856	0.01	0.08	-0.439476	0.176037	0.01	0.05
Total phytosterol	Candidatus Cibionibacter quicibialis	EC6.1.1.23	Aspartate--tRNA(Asn) ligase	0.589636	0.2447	0.02	0.08	-0.370766	0.149286	0.01	0.05
Total phytosterol	Candidatus Cibionibacter quicibialis	EC6.1.1.3	Threonine--tRNA ligase	0.682833	0.281986	0.02	0.08	-0.415427	0.171902	0.02	0.05
Total phytosterol	Candidatus Cibionibacter quicibialis	EC6.1.1.6	Lysine--tRNA ligase	0.680982	0.269214	0.01	0.08	-0.426198	0.16431	0.009	0.05
Total phytosterol	Candidatus Cibionibacter quicibialis	EC6.1.1.7	Alanine--tRNA ligase	0.509687	0.228574	0.03	0.09	-0.314667	0.138918	0.02	0.05
Total phytosterol	Candidatus Cibionibacter quicibialis	EC6.3.1.1	Aspartate--ammonia ligase	0.432396	0.186475	0.02	0.08	-0.269567	0.113725	0.02	0.05
Total phytosterol	Candidatus Cibionibacter quicibialis	EC6.3.1.2	Glutamate--ammonia ligase	0.597294	0.285833	0.04	0.09	-0.411828	0.173585	0.02	0.05
Total phytosterol	Candidatus Cibionibacter quicibialis	EC6.3.2.10	UDP-N-acetylmuramoyl-tripeptide--D-alanyl-D-alanine ligase	0.354431	0.185665	0.06	0.11	-0.19694	0.112897	0.08	0.1
Total phytosterol	Candidatus Cibionibacter quicibialis	EC6.3.2.13	UDP-N-acetylmuramoyl-L-alanyl-D-glutamate--2,6-diaminopimelate ligase	0.36744	0.190552	0.05	0.11	-0.2477	0.115782	0.03	0.06
Total phytosterol	Candidatus Cibionibacter quicibialis	EC6.3.2.2	Glutamate--cysteine ligase	0.3512	0.177648	0.05	0.1	-0.187473	0.10815	0.08	0.1
Total phytosterol	Candidatus Cibionibacter quicibialis	EC6.3.2.8	UDP-N-acetylmuramate--L-alanine ligase	0.382856	0.177544	0.03	0.09	-0.145489	0.108617	0.18	0.19
Total phytosterol	Candidatus Cibionibacter quicibialis	EC6.3.2.9	UDP-N-acetylmuramoyl-L-alanine--D-glutamate ligase	0.333584	0.177371	0.06	0.12	-0.206541	0.107938	0.06	0.08
Total phytosterol	Candidatus Cibionibacter quicibialis	EC6.3.3.1	Phosphoribosylformylglycinamidine cyclo-ligase	0.300875	0.171707	0.08	0.14	-0.219803	0.104844	0.04	0.06
Total phytosterol	Candidatus Cibionibacter quicibialis	EC6.3.4.13	Phosphoribosylamine--glycine ligase	0.638534	0.253673	0.01	0.08	-0.372519	0.154514	0.02	0.05
Total phytosterol	Candidatus Cibionibacter quicibialis	EC6.3.4.15	Biotin--[acetyl-CoA-carboxylase] ligase	0.291451	0.171186	0.09	0.16	-0.186154	0.104367	0.07	0.09
Total phytosterol	Candidatus Cibionibacter quicibialis	EC6.3.4.19	tRNA(Ile)-lysidine synthetase	0.318339	0.181549	0.08	0.14	-0.222223	0.110927	0.05	0.07
Total phytosterol	Candidatus Cibionibacter quicibialis	EC6.3.4.21	Nicotinate phosphoribosyltransferase	0.654814	0.259953	0.01	0.08	-0.390009	0.158676	0.01	0.05
Total phytosterol	Candidatus Cibionibacter quicibialis	EC6.3.4.3	Formate--tetrahydrofolate ligase	0.3508	0.190649	0.07	0.12	-0.199001	0.115644	0.09	0.1
Total phytosterol	Candidatus Cibionibacter quicibialis	EC6.3.4.4	Adenylosuccinate synthase	0.365017	0.187942	0.05	0.11	-0.223801	0.11405	0.05	0.07
Total phytosterol	Candidatus Cibionibacter quicibialis	EC6.3.4.5	Argininosuccinate synthase	0.485949	0.228246	0.03	0.09	-0.346141	0.139029	0.01	0.05
Total phytosterol	Candidatus Cibionibacter quicibialis	EC6.3.5.1	NAD(+) synthase (glutamine-hydrolyzing)	0.398451	0.170288	0.02	0.08	-0.24726	0.103626	0.02	0.05
Total phytosterol	Candidatus Cibionibacter quicibialis	EC6.3.5.2	GMP synthase (glutamine-hydrolyzing)	0.589537	0.250763	0.02	0.08	-0.354337	0.153671	0.02	0.05
Total phytosterol	Candidatus Cibionibacter quicibialis	EC6.3.5.3	Phosphoribosylformylglycinamidine synthase	0.357979	0.170687	0.04	0.09	-0.219798	0.103594	0.03	0.06
Total phytosterol	Candidatus Cibionibacter quicibialis	EC6.3.5.4	Asparagine synthase (glutamine-hydrolyzing)	0.562921	0.273763	0.04	0.1	-0.411152	0.166975	0.01	0.05
Total phytosterol	Candidatus Cibionibacter quicibialis	EC6.3.5.5	Carbamoyl-phosphate synthase (glutamine-hydrolyzing)	0.553712	0.271927	0.04	0.1	-0.364301	0.164834	0.03	0.06
Total phytosterol	Candidatus Cibionibacter quicibialis	EC6.4.1.1	Pyruvate carboxylase	0.643802	0.265733	0.02	0.08	-0.397021	0.161315	0.01	0.05
Total phytosterol	Candidatus Cibionibacter quicibialis	EC6.4.1.2	Acetyl-CoA carboxylase	0.409099	0.248232	0.1	0.17	-0.280342	0.152757	0.07	0.09
Total phytosterol	Candidatus Cibionibacter quicibialis	EC7.1.2.2	NO_NAME	0.66991	0.257423	0.009	0.08	-0.389536	0.156442	0.01	0.05
Total phytosterol	Candidatus Cibionibacter quicibialis	EC7.2.2.10	NO_NAME	0.294623	0.178031	0.1	0.17	-0.219996	0.108375	0.04	0.07
Total phytosterol	Candidatus Cibionibacter quicibialis	EC7.2.2.8	NO_NAME	0.302229	0.170899	0.08	0.14	-0.230765	0.103613	0.03	0.05
Total phytosterol	Candidatus Cibionibacter quicibialis	EC7.2.4.5	NO_NAME	0.637952	0.278987	0.02	0.08	-0.415197	0.169753	0.01	0.05
Total phytosterol	Candidatus Cibionibacter quicibialis	EC7.4.2.10	NO_NAME	0.564138	0.24754	0.02	0.08	-0.359999	0.150385	0.02	0.05
Total phytosterol	Candidatus Cibionibacter quicibialis	EC7.4.2.11	NO_NAME	0.331986	0.173891	0.06	0.11	-0.240052	0.106229	0.02	0.05
Total phytosterol	Candidatus Cibionibacter quicibialis	EC7.4.2.4	NO_NAME	0.313987	0.183211	0.09	0.15	-0.23731	0.110887	0.03	0.06
Total phytosterol	Candidatus Cibionibacter quicibialis	EC7.5.2.7	NO_NAME	0.383083	0.181026	0.03	0.09	-0.230568	0.109858	0.04	0.06
Total phytosterol	Candidatus Cibionibacter quicibialis	EC7.6.2.11	NO_NAME	0.326998	0.168206	0.05	0.11	-0.201356	0.102897	0.05	0.07
Total phytosterol	Candidatus Cibionibacter quicibialis	EC7.6.2.15	NO_NAME	0.57408	0.230532	0.01	0.08	-0.286017	0.140348	0.04	0.07
Total phytosterol	Faecalibacterium prausnitzii	EC1.1.1.1	Alcohol dehydrogenase	0.353705	0.185807	0.06	0.11	-0.193921	0.114563	0.09	0.11
Total phytosterol	Faecalibacterium prausnitzii	EC1.1.1.100	3-oxoacyl-[acyl-carrier-protein] reductase	0.370652	0.147019	0.01	0.08	-0.236087	0.0916379	0.01	0.05
Total phytosterol	Faecalibacterium prausnitzii	EC1.1.1.131	Mannuronate reductase	0.256616	0.170729	0.13	0.22	-0.211829	0.104887	0.04	0.07
Total phytosterol	Faecalibacterium prausnitzii	EC1.1.1.133	dTDP-4-dehydrorhamnose reductase	0.295749	0.140049	0.03	0.09	-0.209056	0.0874112	0.02	0.05
Total phytosterol	Faecalibacterium prausnitzii	EC1.1.1.14	L-iditol 2-dehydrogenase	0.366979	0.290625	0.21	0.32	-0.521828	0.177514	0.003	0.04
Total phytosterol	Faecalibacterium prausnitzii	EC1.1.1.157	3-hydroxybutyryl-CoA dehydrogenase	0.323365	0.137755	0.02	0.08	-0.2508	0.0863902	0.004	0.04
Total phytosterol	Faecalibacterium prausnitzii	EC1.1.1.169	2-dehydropantoate 2-reductase	0.38497	0.169346	0.02	0.08	-0.443568	0.104074	<0.001	0.002
Total phytosterol	Faecalibacterium prausnitzii	EC1.1.1.193	5-amino-6-(5-phosphoribosylamino)uracil reductase	0.210224	0.14088	0.14	0.22	-0.209808	0.0869722	0.02	0.05
Total phytosterol	Faecalibacterium prausnitzii	EC1.1.1.2	Alcohol dehydrogenase (NADP(+))	0.303703	0.137828	0.03	0.09	-0.215698	0.0849659	0.01	0.05
Total phytosterol	Faecalibacterium prausnitzii	EC1.1.1.205	IMP dehydrogenase	0.257786	0.139463	0.06	0.12	-0.203964	0.0872866	0.02	0.05
Total phytosterol	Faecalibacterium prausnitzii	EC1.1.1.22	UDP-glucose 6-dehydrogenase	0.594964	0.304046	0.05	0.11	-0.0270626	0.186417	0.88	0.89
Total phytosterol	Faecalibacterium prausnitzii	EC1.1.1.23	Histidinol dehydrogenase	0.36292	0.147904	0.01	0.08	-0.221016	0.0918024	0.02	0.05
Total phytosterol	Faecalibacterium prausnitzii	EC1.1.1.25	Shikimate dehydrogenase	0.306486	0.123416	0.01	0.08	-0.214589	0.0772318	0.005	0.04
Total phytosterol	Faecalibacterium prausnitzii	EC1.1.1.262	4-hydroxythreonine-4-phosphate dehydrogenase	0.285957	0.204002	0.16	0.25	-0.303919	0.124609	0.01	0.05
Total phytosterol	Faecalibacterium prausnitzii	EC1.1.1.267	1-deoxy-D-xylulose-5-phosphate reductoisomerase	0.254672	0.121079	0.04	0.09	-0.174376	0.0754578	0.02	0.05
Total phytosterol	Faecalibacterium prausnitzii	EC1.1.1.28	D-lactate dehydrogenase	0.491198	0.22208	0.03	0.09	-0.369415	0.135906	0.007	0.04
Total phytosterol	Faecalibacterium prausnitzii	EC1.1.1.290	4-phosphoerythronate dehydrogenase	0.303742	0.156686	0.05	0.11	-0.232705	0.0971161	0.02	0.05
Total phytosterol	Faecalibacterium prausnitzii	EC1.1.1.292	1,5-anhydro-D-fructose reductase (1,5-anhydro-D-mannitol-forming)	0.324586	0.136938	0.02	0.08	-0.236283	0.0850358	0.005	0.04
Total phytosterol	Faecalibacterium prausnitzii	EC1.1.1.3	Homoserine dehydrogenase	0.312054	0.128689	0.02	0.08	-0.196224	0.0800465	0.01	0.05
Total phytosterol	Faecalibacterium prausnitzii	EC1.1.1.30	3-hydroxybutyrate dehydrogenase	0.516185	0.20912	0.01	0.08	-0.115183	0.128384	0.37	0.38
Total phytosterol	Faecalibacterium prausnitzii	EC1.1.1.35	3-hydroxyacyl-CoA dehydrogenase	0.322066	0.137643	0.02	0.08	-0.254842	0.0862832	0.003	0.04
Total phytosterol	Faecalibacterium prausnitzii	EC1.1.1.38	Malate dehydrogenase (oxaloacetate-decarboxylating)	0.333872	0.151409	0.03	0.09	-0.27629	0.0943798	0.003	0.04
Total phytosterol	Faecalibacterium prausnitzii	EC1.1.1.40	Malate dehydrogenase (oxaloacetate-decarboxylating) (NADP(+))	0.394366	0.181078	0.03	0.09	-0.434597	0.112145	<0.001	0.006
Total phytosterol	Faecalibacterium prausnitzii	EC1.1.1.42	Isocitrate dehydrogenase (NADP(+))	0.483748	0.162569	0.003	0.08	-0.208378	0.100767	0.04	0.06
Total phytosterol	Faecalibacterium prausnitzii	EC1.1.1.58	Tagaturonate reductase	0.283233	0.135031	0.04	0.09	-0.280149	0.0840092	<0.001	0.02
Total phytosterol	Faecalibacterium prausnitzii	EC1.1.1.69	Gluconate 5-dehydrogenase	0.308748	0.134349	0.02	0.08	-0.158904	0.0841197	0.06	0.08
Total phytosterol	Faecalibacterium prausnitzii	EC1.1.1.77	Lactaldehyde reductase	0.294562	0.153454	0.05	0.11	-0.260014	0.0958446	0.007	0.04
Total phytosterol	Faecalibacterium prausnitzii	EC1.1.1.85	3-isopropylmalate dehydrogenase	0.408398	0.178127	0.02	0.08	-0.269091	0.10955	0.01	0.05
Total phytosterol	Faecalibacterium prausnitzii	EC1.1.1.86	Ketol-acid reductoisomerase (NADP(+))	0.257214	0.128632	0.05	0.1	-0.178324	0.0807429	0.03	0.06
Total phytosterol	Faecalibacterium prausnitzii	EC1.1.1.94	Glycerol-3-phosphate dehydrogenase (NAD(P)(+))	0.349315	0.13632	0.01	0.08	-0.198587	0.0849101	0.02	0.05
Total phytosterol	Faecalibacterium prausnitzii	EC1.1.1.95	Phosphoglycerate dehydrogenase	0.283944	0.138266	0.04	0.1	-0.256407	0.0857763	0.003	0.04
Total phytosterol	Faecalibacterium prausnitzii	EC1.1.2.3	L-lactate dehydrogenase (cytochrome)	0.400949	0.14613	0.006	0.08	-0.394846	0.0906536	<0.001	0.002
Total phytosterol	Faecalibacterium prausnitzii	EC1.1.99.28	Glucose-fructose oxidoreductase	0.44629	0.176075	0.01	0.08	-0.224515	0.108449	0.04	0.06
Total phytosterol	Faecalibacterium prausnitzii	EC1.11.1.1	NADH peroxidase	0.281257	0.136162	0.04	0.1	-0.242814	0.0848812	0.004	0.04
Total phytosterol	Faecalibacterium prausnitzii	EC1.12.7.2	Ferredoxin hydrogenase	0.283013	0.119731	0.02	0.08	-0.185679	0.075059	0.01	0.05
Total phytosterol	Faecalibacterium prausnitzii	EC1.13.12.16	Nitronate monooxygenase	0.268721	0.180644	0.14	0.22	-0.125154	0.110702	0.26	0.27
Total phytosterol	Faecalibacterium prausnitzii	EC1.15.1.2	Superoxide reductase	0.40956	0.15555	0.008	0.08	-0.276184	0.0961016	0.004	0.04
Total phytosterol	Faecalibacterium prausnitzii	EC1.16.3.2	Bacterial non-heme ferritin	0.170683	0.162668	0.29	0.44	-0.13583	0.100095	0.17	0.19
Total phytosterol	Faecalibacterium prausnitzii	EC1.17.1.4	Xanthine dehydrogenase	0.241556	0.210346	0.25	0.38	-0.440452	0.128936	<0.001	0.02
Total phytosterol	Faecalibacterium prausnitzii	EC1.17.1.8	4-hydroxy-tetrahydrodipicolinate reductase	0.45226	0.164523	0.006	0.08	-0.383388	0.102905	<0.001	0.009
Total phytosterol	Faecalibacterium prausnitzii	EC1.17.4.1	Ribonucleoside-diphosphate reductase	0.273277	0.141291	0.05	0.11	-0.239178	0.0876587	0.006	0.04
Total phytosterol	Faecalibacterium prausnitzii	EC1.17.4.2	Ribonucleoside-triphosphate reductase	0.323612	0.131079	0.01	0.08	-0.269701	0.0814588	<0.001	0.02
Total phytosterol	Faecalibacterium prausnitzii	EC1.17.99.6	Epoxyqueuosine reductase	0.32068	0.131802	0.01	0.08	-0.226811	0.0823401	0.006	0.04
Total phytosterol	Faecalibacterium prausnitzii	EC1.18.1.2	Ferredoxin--NADP(+) reductase	0.289815	0.12273	0.02	0.08	-0.218983	0.0768942	0.004	0.04
Total phytosterol	Faecalibacterium prausnitzii	EC1.2.1.11	Aspartate-semialdehyde dehydrogenase	0.267482	0.138795	0.05	0.11	-0.210604	0.0864833	0.01	0.05
Total phytosterol	Faecalibacterium prausnitzii	EC1.2.1.24	Succinate-semialdehyde dehydrogenase (NAD(+))	0.30433	0.126159	0.02	0.08	-0.207453	0.0788752	0.009	0.05
Total phytosterol	Faecalibacterium prausnitzii	EC1.2.1.38	N-acetyl-gamma-glutamyl-phosphate reductase	0.255043	0.121441	0.04	0.09	-0.177141	0.0756186	0.02	0.05
Total phytosterol	Faecalibacterium prausnitzii	EC1.2.1.41	Glutamate-5-semialdehyde dehydrogenase	0.335628	0.151659	0.03	0.09	-0.224395	0.0937186	0.02	0.05
Total phytosterol	Faecalibacterium prausnitzii	EC1.2.7.1	Pyruvate synthase	0.314255	0.128369	0.01	0.08	-0.275423	0.079941	<0.001	0.02
Total phytosterol	Faecalibacterium prausnitzii	EC1.3.1.108	NO_NAME	0.290862	0.128474	0.02	0.08	-0.201329	0.0806118	0.01	0.05
Total phytosterol	Faecalibacterium prausnitzii	EC1.3.1.14	Dihydroorotate dehydrogenase (NAD(+))	0.294568	0.119528	0.01	0.08	-0.205438	0.0751445	0.006	0.04
Total phytosterol	Faecalibacterium prausnitzii	EC1.3.1.43	Arogenate dehydrogenase	0.337844	0.124925	0.007	0.08	-0.189371	0.0780993	0.02	0.05
Total phytosterol	Faecalibacterium prausnitzii	EC1.3.1.54	Precorrin-6A reductase	0.39776	0.138922	0.004	0.08	-0.18419	0.0866551	0.03	0.06
Total phytosterol	Faecalibacterium prausnitzii	EC1.3.1.74	2-alkenal reductase (NAD(P)(+))	0.289746	0.142358	0.04	0.1	-0.200824	0.0881424	0.02	0.05
Total phytosterol	Faecalibacterium prausnitzii	EC1.3.1.95	Acryloyl-CoA reductase (NADH)	0.233034	0.122773	0.06	0.11	-0.19826	0.0770003	0.01	0.05
Total phytosterol	Faecalibacterium prausnitzii	EC1.3.7.9	4-hydroxybenzoyl-CoA reductase	0.427889	0.176218	0.02	0.08	-0.147463	0.108519	0.17	0.19
Total phytosterol	Faecalibacterium prausnitzii	EC1.3.8.1	Short-chain acyl-CoA dehydrogenase	0.244994	0.129733	0.06	0.12	-0.182914	0.0811401	0.02	0.05
Total phytosterol	Faecalibacterium prausnitzii	EC1.3.99.1	Deleted entry	0.514672	0.188614	0.006	0.08	-0.30533	0.116808	0.009	0.05
Total phytosterol	Faecalibacterium prausnitzii	EC1.3.99.4	3-oxosteroid 1-dehydrogenase	0.501147	0.175594	0.004	0.08	-0.257941	0.109814	0.02	0.05
Total phytosterol	Faecalibacterium prausnitzii	EC1.4.1.13	Glutamate synthase (NADPH)	0.261108	0.133497	0.05	0.11	-0.162259	0.083377	0.05	0.07
Total phytosterol	Faecalibacterium prausnitzii	EC1.4.1.14	Glutamate synthase (NADH)	0.271815	0.13813	0.05	0.11	-0.190043	0.0861776	0.03	0.06
Total phytosterol	Faecalibacterium prausnitzii	EC1.4.1.21	Aspartate dehydrogenase	0.474882	0.15984	0.003	0.08	-0.161155	0.0990238	0.1	0.12
Total phytosterol	Faecalibacterium prausnitzii	EC1.4.1.4	Glutamate dehydrogenase (NADP(+))	0.25143	0.137298	0.07	0.13	-0.257272	0.0855217	0.003	0.04
Total phytosterol	Faecalibacterium prausnitzii	EC1.4.4.2	Glycine dehydrogenase (aminomethyl-transferring)	0.693055	0.242414	0.004	0.08	-0.368887	0.147971	0.01	0.05
Total phytosterol	Faecalibacterium prausnitzii	EC1.4.7.1	Glutamate synthase (ferredoxin)	0.322844	0.152922	0.03	0.09	-0.212629	0.0948253	0.02	0.05
Total phytosterol	Faecalibacterium prausnitzii	EC1.5.1.2	Pyrroline-5-carboxylate reductase	0.284998	0.123626	0.02	0.08	-0.202157	0.077315	0.009	0.05
Total phytosterol	Faecalibacterium prausnitzii	EC1.5.1.20	Methylenetetrahydrofolate reductase (NAD(P)H)	0.308189	0.133955	0.02	0.08	-0.237574	0.0833121	0.004	0.04
Total phytosterol	Faecalibacterium prausnitzii	EC1.5.1.39	FMN reductase (NAD(P)H)	0.420958	0.254475	0.1	0.17	0.00682763	0.155032	0.96	0.97
Total phytosterol	Faecalibacterium prausnitzii	EC1.5.1.7	Saccharopine dehydrogenase (NAD(+), L-lysine-forming)	0.296992	0.116206	0.01	0.08	-0.197654	0.0732986	0.007	0.04
Total phytosterol	Faecalibacterium prausnitzii	EC1.6.5.3	NADH:ubiquinone reductase (H(+)-translocating)	0.271598	0.144272	0.06	0.12	-0.262869	0.0892748	0.003	0.04
Total phytosterol	Faecalibacterium prausnitzii	EC1.6.99.3	NADH dehydrogenase	0.356855	0.176828	0.04	0.1	-0.195083	0.108939	0.07	0.09
Total phytosterol	Faecalibacterium prausnitzii	EC1.7.99.1	Hydroxylamine reductase	0.405924	0.134821	0.003	0.08	-0.221244	0.0839796	0.008	0.05
Total phytosterol	Faecalibacterium prausnitzii	EC1.8.1.14	CoA-disulfide reductase	0.29198	0.177862	0.1	0.17	-0.331135	0.109358	0.002	0.03
Total phytosterol	Faecalibacterium prausnitzii	EC1.8.1.19	Sulfide dehydrogenase	0.2775	0.116804	0.02	0.08	-0.19176	0.0735517	0.009	0.05
Total phytosterol	Faecalibacterium prausnitzii	EC1.8.1.9	Thioredoxin-disulfide reductase	0.346194	0.123921	0.005	0.08	-0.201684	0.0778559	0.01	0.05
Total phytosterol	Faecalibacterium prausnitzii	EC1.97.1.4	[Formate-C-acetyltransferase]-activating enzyme	0.367591	0.135197	0.007	0.08	-0.246337	0.0846514	0.004	0.04
Total phytosterol	Faecalibacterium prausnitzii	EC2.1.1.10	Homocysteine S-methyltransferase	0.308189	0.133955	0.02	0.08	-0.237574	0.0833121	0.004	0.04
Total phytosterol	Faecalibacterium prausnitzii	EC2.1.1.13	Methionine synthase	0.335562	0.192497	0.08	0.15	-0.220987	0.118332	0.06	0.08
Total phytosterol	Faecalibacterium prausnitzii	EC2.1.1.130	Precorrin-2 C(20)-methyltransferase	0.259925	0.213718	0.22	0.34	-0.4235	0.133736	0.002	0.03
Total phytosterol	Faecalibacterium prausnitzii	EC2.1.1.132	Precorrin-6B C(5,15)-methyltransferase (decarboxylating)	0.390428	0.13708	0.004	0.08	-0.206218	0.0853454	0.02	0.05
Total phytosterol	Faecalibacterium prausnitzii	EC2.1.1.133	Precorrin-4 C(11)-methyltransferase	0.409349	0.144649	0.005	0.08	-0.389653	0.0896553	<0.001	0.002
Total phytosterol	Faecalibacterium prausnitzii	EC2.1.1.148	Thymidylate synthase (FAD)	0.272658	0.123085	0.03	0.09	-0.190798	0.0768444	0.01	0.05
Total phytosterol	Faecalibacterium prausnitzii	EC2.1.1.151	Cobalt-factor II C(20)-methyltransferase	0.381368	0.17545	0.03	0.09	-0.254003	0.107962	0.02	0.05
Total phytosterol	Faecalibacterium prausnitzii	EC2.1.1.166	23S rRNA (uridine(2552)-2'-O)-methyltransferase	0.343217	0.181576	0.06	0.12	-0.340965	0.111845	0.002	0.03
Total phytosterol	Faecalibacterium prausnitzii	EC2.1.1.170	16S rRNA (guanine(527)-N(7))-methyltransferase	0.304972	0.122374	0.01	0.08	-0.212979	0.0764342	0.005	0.04
Total phytosterol	Faecalibacterium prausnitzii	EC2.1.1.171	16S rRNA (guanine(966)-N(2))-methyltransferase	0.299371	0.222405	0.18	0.28	-0.392005	0.137754	0.004	0.04
Total phytosterol	Faecalibacterium prausnitzii	EC2.1.1.173	23S rRNA (guanine(2445)-N(2))-methyltransferase	0.594543	0.199265	0.003	0.08	-0.49144	0.121967	<0.001	0.004
Total phytosterol	Faecalibacterium prausnitzii	EC2.1.1.178	16S rRNA (cytosine(1407)-C(5))-methyltransferase	0.397079	0.182068	0.03	0.09	-0.0275908	0.11187	0.81	0.81
Total phytosterol	Faecalibacterium prausnitzii	EC2.1.1.187	23S rRNA (guanine(745)-N(1))-methyltransferase	0.521809	0.194225	0.007	0.08	-0.253126	0.119654	0.03	0.06
Total phytosterol	Faecalibacterium prausnitzii	EC2.1.1.189	23S rRNA (uracil(747)-C(5))-methyltransferase	0.566879	0.175825	0.001	0.08	-0.400207	0.108726	<0.001	0.01
Total phytosterol	Faecalibacterium prausnitzii	EC2.1.1.190	23S rRNA (uracil(1939)-C(5))-methyltransferase	0.209741	0.192509	0.28	0.41	-0.176451	0.11852	0.14	0.15
Total phytosterol	Faecalibacterium prausnitzii	EC2.1.1.191	23S rRNA (cytosine(1962)-C(5))-methyltransferase	0.270732	0.127134	0.03	0.09	-0.228097	0.0788824	0.004	0.04
Total phytosterol	Faecalibacterium prausnitzii	EC2.1.1.195	Cobalt-precorrin-5B (C(1))-methyltransferase	0.323714	0.142421	0.02	0.08	-0.167447	0.0887374	0.06	0.08
Total phytosterol	Faecalibacterium prausnitzii	EC2.1.1.197	Malonyl-[acyl-carrier protein] O-methyltransferase	0.481554	0.228965	0.04	0.09	-0.148844	0.14029	0.29	0.3
Total phytosterol	Faecalibacterium prausnitzii	EC2.1.1.198	16S rRNA (cytidine(1402)-2'-O)-methyltransferase	0.303662	0.117079	0.009	0.08	-0.197424	0.0733928	0.007	0.04
Total phytosterol	Faecalibacterium prausnitzii	EC2.1.1.199	16S rRNA (cytosine(1402)-N(4))-methyltransferase	0.306566	0.123133	0.01	0.08	-0.169437	0.0775605	0.03	0.06
Total phytosterol	Faecalibacterium prausnitzii	EC2.1.1.297	Peptide chain release factor N(5)-glutamine methyltransferase	0.534506	0.188994	0.005	0.08	-0.311956	0.116544	0.007	0.04
Total phytosterol	Faecalibacterium prausnitzii	EC2.1.1.33	tRNA (guanine(46)-N(7))-methyltransferase	0.287862	0.13831	0.04	0.09	-0.215404	0.0862664	0.01	0.05
Total phytosterol	Faecalibacterium prausnitzii	EC2.1.1.37	DNA (cytosine-5-)-methyltransferase	0.430213	0.140263	0.002	0.08	-0.326733	0.0871805	<0.001	0.009
Total phytosterol	Faecalibacterium prausnitzii	EC2.1.1.51	Transferred entry	0.383105	0.216067	0.08	0.14	-0.247713	0.133312	0.06	0.08
Total phytosterol	Faecalibacterium prausnitzii	EC2.1.1.63	Methylated-DNA--[protein]-cysteine S-methyltransferase	0.376277	0.137642	0.006	0.08	-0.151463	0.0861053	0.08	0.1
Total phytosterol	Faecalibacterium prausnitzii	EC2.1.1.64	3-demethylubiquinol 3-O-methyltransferase	0.258541	0.12074	0.03	0.09	-0.16235	0.075686	0.03	0.06
Total phytosterol	Faecalibacterium prausnitzii	EC2.1.1.72	Site-specific DNA-methyltransferase (adenine-specific)	0.32694	0.133248	0.01	0.08	-0.214736	0.0835933	0.01	0.05
Total phytosterol	Faecalibacterium prausnitzii	EC2.1.2.3	Phosphoribosylaminoimidazolecarboxamide formyltransferase	0.303185	0.116369	0.009	0.08	-0.160621	0.0729051	0.03	0.06
Total phytosterol	Faecalibacterium prausnitzii	EC2.1.3.1	Methylmalonyl-CoA carboxytransferase	0.305457	0.134464	0.02	0.08	-0.182739	0.0844988	0.03	0.06
Total phytosterol	Faecalibacterium prausnitzii	EC2.1.3.2	Aspartate carbamoyltransferase	0.32862	0.12951	0.01	0.08	-0.147085	0.0814152	0.07	0.09
Total phytosterol	Faecalibacterium prausnitzii	EC2.1.3.3	Ornithine carbamoyltransferase	0.315838	0.129379	0.01	0.08	-0.216079	0.0807236	0.007	0.04
Total phytosterol	Faecalibacterium prausnitzii	EC2.2.1.1	Transketolase	0.346912	0.125287	0.006	0.08	-0.195701	0.0785783	0.01	0.05
Total phytosterol	Faecalibacterium prausnitzii	EC2.2.1.2	Transaldolase	0.547984	0.245497	0.03	0.09	-0.617486	0.149248	<0.001	0.003
Total phytosterol	Faecalibacterium prausnitzii	EC2.2.1.6	Acetolactate synthase	0.33002	0.135463	0.01	0.08	-0.216106	0.0846453	0.01	0.05
Total phytosterol	Faecalibacterium prausnitzii	EC2.2.1.7	1-deoxy-D-xylulose-5-phosphate synthase	0.333625	0.133468	0.01	0.08	-0.19273	0.0831578	0.02	0.05
Total phytosterol	Faecalibacterium prausnitzii	EC2.3.1.129	Acyl-[acyl-carrier-protein]--UDP-N-acetylglucosamine O-acyltransferase	0.259529	0.204785	0.21	0.31	-0.213722	0.126475	0.09	0.11
Total phytosterol	Faecalibacterium prausnitzii	EC2.3.1.179	Beta-ketoacyl-[acyl-carrier-protein] synthase II	0.354651	0.125899	0.005	0.08	-0.24023	0.0787066	0.002	0.03
Total phytosterol	Faecalibacterium prausnitzii	EC2.3.1.18	Galactoside O-acetyltransferase	0.755696	0.275173	0.006	0.08	-0.0368207	0.169434	0.83	0.83
Total phytosterol	Faecalibacterium prausnitzii	EC2.3.1.180	Beta-ketoacyl-[acyl-carrier-protein] synthase III	0.351035	0.139531	0.01	0.08	-0.210905	0.0871867	0.02	0.05
Total phytosterol	Faecalibacterium prausnitzii	EC2.3.1.183	Phosphinothricin acetyltransferase	0.550478	0.202961	0.007	0.08	-0.205451	0.124923	0.1	0.12
Total phytosterol	Faecalibacterium prausnitzii	EC2.3.1.222	Phosphate propanoyltransferase	0.369167	0.22967	0.11	0.18	-0.32653	0.13953	0.02	0.05
Total phytosterol	Faecalibacterium prausnitzii	EC2.3.1.30	Serine O-acetyltransferase	0.316134	0.128773	0.01	0.08	-0.139689	0.0803113	0.08	0.1
Total phytosterol	Faecalibacterium prausnitzii	EC2.3.1.31	Homoserine O-acetyltransferase	0.288172	0.124129	0.02	0.08	-0.202862	0.0776563	0.009	0.05
Total phytosterol	Faecalibacterium prausnitzii	EC2.3.1.39	[Acyl-carrier-protein] S-malonyltransferase	0.306796	0.149857	0.04	0.1	-0.198566	0.0928141	0.03	0.06
Total phytosterol	Faecalibacterium prausnitzii	EC2.3.1.46	Homoserine O-succinyltransferase	0.512676	0.178712	0.004	0.08	-0.361496	0.110129	0.001	0.02
Total phytosterol	Faecalibacterium prausnitzii	EC2.3.1.51	1-acylglycerol-3-phosphate O-acyltransferase	0.307589	0.127614	0.02	0.08	-0.228629	0.080047	0.004	0.04
Total phytosterol	Faecalibacterium prausnitzii	EC2.3.1.54	Formate C-acetyltransferase	0.292126	0.133824	0.03	0.09	-0.192637	0.0838739	0.02	0.05
Total phytosterol	Faecalibacterium prausnitzii	EC2.3.1.57	Diamine N-acetyltransferase	0.510055	0.236241	0.03	0.09	-0.396549	0.145428	0.006	0.04
Total phytosterol	Faecalibacterium prausnitzii	EC2.3.1.79	Maltose O-acetyltransferase	0.385846	0.248572	0.12	0.2	-0.383611	0.152268	0.01	0.05
Total phytosterol	Faecalibacterium prausnitzii	EC2.3.1.8	Phosphate acetyltransferase	0.267947	0.129205	0.04	0.1	-0.215631	0.0807497	0.008	0.04
Total phytosterol	Faecalibacterium prausnitzii	EC2.3.1.81	Aminoglycoside N(3')-acetyltransferase	0.333621	0.246251	0.18	0.27	0.00518421	0.148766	0.97	0.97
Total phytosterol	Faecalibacterium prausnitzii	EC2.3.1.9	Acetyl-CoA C-acetyltransferase	0.28927	0.118791	0.01	0.08	-0.19668	0.0748791	0.009	0.05
Total phytosterol	Faecalibacterium prausnitzii	EC2.3.2.3	Lysyltransferase	0.333606	0.131841	0.01	0.08	-0.190633	0.0824587	0.02	0.05
Total phytosterol	Faecalibacterium prausnitzii	EC2.3.3.13	2-isopropylmalate synthase	0.264224	0.13251	0.05	0.1	-0.216183	0.0822648	0.009	0.05
Total phytosterol	Faecalibacterium prausnitzii	EC2.4.1.1	Glycogen phosphorylase	0.324819	0.15089	0.03	0.09	-0.198743	0.094234	0.03	0.06
Total phytosterol	Faecalibacterium prausnitzii	EC2.4.1.117	Dolichyl-phosphate beta-glucosyltransferase	0.300667	0.152927	0.05	0.11	-0.142444	0.0959819	0.14	0.15
Total phytosterol	Faecalibacterium prausnitzii	EC2.4.1.129	Peptidoglycan glycosyltransferase	0.390758	0.176482	0.03	0.09	-0.471598	0.108085	<0.001	0.002
Total phytosterol	Faecalibacterium prausnitzii	EC2.4.1.18	1,4-alpha-glucan branching enzyme	0.316339	0.142054	0.03	0.09	-0.231104	0.0881761	0.009	0.05
Total phytosterol	Faecalibacterium prausnitzii	EC2.4.1.20	Cellobiose phosphorylase	0.432923	0.146288	0.003	0.08	-0.222823	0.0910356	0.01	0.05
Total phytosterol	Faecalibacterium prausnitzii	EC2.4.1.21	Starch synthase	0.29119	0.125091	0.02	0.08	-0.178847	0.0785287	0.02	0.05
Total phytosterol	Faecalibacterium prausnitzii	EC2.4.1.211	1,3-beta-galactosyl-N-acetylhexosamine phosphorylase	0.294937	0.124009	0.02	0.08	-0.211465	0.0769956	0.006	0.04
Total phytosterol	Faecalibacterium prausnitzii	EC2.4.1.212	Hyaluronan synthase	0.700587	0.188262	<0.001	0.08	-0.465042	0.115634	<0.001	0.004
Total phytosterol	Faecalibacterium prausnitzii	EC2.4.1.25	4-alpha-glucanotransferase	0.317285	0.131968	0.02	0.08	-0.187399	0.0828614	0.02	0.05
Total phytosterol	Faecalibacterium prausnitzii	EC2.4.1.321	Cellobionic acid phosphorylase	0.455524	0.263565	0.08	0.15	-0.166535	0.162792	0.31	0.32
Total phytosterol	Faecalibacterium prausnitzii	EC2.4.1.57	Phosphatidylinositol alpha-mannosyltransferase	0.390013	0.206305	0.06	0.12	-0.00763453	0.125876	0.95	0.95
Total phytosterol	Faecalibacterium prausnitzii	EC2.4.1.64	Alpha,alpha-trehalose phosphorylase	0.377952	0.171777	0.03	0.09	-0.247564	0.10532	0.02	0.05
Total phytosterol	Faecalibacterium prausnitzii	EC2.4.2.1	Purine-nucleoside phosphorylase	0.268872	0.13252	0.04	0.1	-0.174873	0.0825919	0.03	0.06
Total phytosterol	Faecalibacterium prausnitzii	EC2.4.2.10	Orotate phosphoribosyltransferase	0.298615	0.11656	0.01	0.08	-0.19927	0.073347	0.007	0.04
Total phytosterol	Faecalibacterium prausnitzii	EC2.4.2.14	Amidophosphoribosyltransferase	0.268439	0.130412	0.04	0.1	-0.251876	0.0807891	0.002	0.03
Total phytosterol	Faecalibacterium prausnitzii	EC2.4.2.2	Pyrimidine-nucleoside phosphorylase	0.256568	0.136245	0.06	0.12	-0.193658	0.0847042	0.02	0.05
Total phytosterol	Faecalibacterium prausnitzii	EC2.4.2.21	Nicotinate-nucleotide--dimethylbenzimidazole phosphoribosyltransferase	0.351608	0.123301	0.004	0.08	-0.172892	0.0776419	0.03	0.05
Total phytosterol	Faecalibacterium prausnitzii	EC2.4.2.22	Xanthine phosphoribosyltransferase	0.264117	0.114248	0.02	0.08	-0.195487	0.0713842	0.006	0.04
Total phytosterol	Faecalibacterium prausnitzii	EC2.4.2.4	Thymidine phosphorylase	0.256568	0.136245	0.06	0.12	-0.193658	0.0847042	0.02	0.05
Total phytosterol	Faecalibacterium prausnitzii	EC2.4.2.7	Adenine phosphoribosyltransferase	0.313883	0.132554	0.02	0.08	-0.200986	0.0830239	0.02	0.05
Total phytosterol	Faecalibacterium prausnitzii	EC2.4.2.8	Hypoxanthine phosphoribosyltransferase	0.342979	0.134656	0.01	0.08	-0.253135	0.0842306	0.003	0.04
Total phytosterol	Faecalibacterium prausnitzii	EC2.4.99.17	S-adenosylmethionine:tRNA ribosyltransferase-isomerase	0.332494	0.139303	0.02	0.08	-0.238434	0.0869978	0.006	0.04
Total phytosterol	Faecalibacterium prausnitzii	EC2.5.1.145	NO_NAME	0.337729	0.122933	0.006	0.08	-0.195763	0.0770245	0.01	0.05
Total phytosterol	Faecalibacterium prausnitzii	EC2.5.1.16	Spermidine synthase	0.289531	0.127475	0.02	0.08	-0.184861	0.0800822	0.02	0.05
Total phytosterol	Faecalibacterium prausnitzii	EC2.5.1.17	Cob(I)yrinic acid a,c-diamide adenosyltransferase	0.427729	0.211794	0.04	0.1	-0.217356	0.13059	0.1	0.11
Total phytosterol	Faecalibacterium prausnitzii	EC2.5.1.19	3-phosphoshikimate 1-carboxyvinyltransferase	0.271627	0.125362	0.03	0.09	-0.209619	0.0778613	0.007	0.04
Total phytosterol	Faecalibacterium prausnitzii	EC2.5.1.29	Geranylgeranyl diphosphate synthase	0.219336	0.18797	0.24	0.37	-0.311862	0.116039	0.007	0.04
Total phytosterol	Faecalibacterium prausnitzii	EC2.5.1.3	Thiamine-phosphate diphosphorylase	0.299703	0.125837	0.02	0.08	-0.199027	0.0785508	0.01	0.05
Total phytosterol	Faecalibacterium prausnitzii	EC2.5.1.31	diphosphate specific)	0.319425	0.132662	0.02	0.08	-0.195222	0.0828166	0.02	0.05
Total phytosterol	Faecalibacterium prausnitzii	EC2.5.1.47	Cysteine synthase	0.397266	0.149609	0.008	0.08	-0.242658	0.092961	0.009	0.05
Total phytosterol	Faecalibacterium prausnitzii	EC2.5.1.49	O-acetylhomoserine aminocarboxypropyltransferase	0.24719	0.139647	0.08	0.14	-0.241524	0.0862596	0.005	0.04
Total phytosterol	Faecalibacterium prausnitzii	EC2.5.1.54	3-deoxy-7-phosphoheptulonate synthase	0.276145	0.131109	0.04	0.09	-0.200161	0.0817555	0.01	0.05
Total phytosterol	Faecalibacterium prausnitzii	EC2.5.1.6	Methionine adenosyltransferase	0.354939	0.129901	0.006	0.08	-0.230946	0.0817749	0.005	0.04
Total phytosterol	Faecalibacterium prausnitzii	EC2.5.1.72	Quinolinate synthase	0.291488	0.13323	0.03	0.09	-0.201618	0.0829769	0.02	0.05
Total phytosterol	Faecalibacterium prausnitzii	EC2.5.1.78	6,7-dimethyl-8-ribityllumazine synthase	0.21601	0.159418	0.18	0.27	-0.247902	0.0986057	0.01	0.05
Total phytosterol	Faecalibacterium prausnitzii	EC2.5.1.9	Riboflavin synthase	0.158267	0.145886	0.28	0.41	-0.187676	0.0904569	0.04	0.06
Total phytosterol	Faecalibacterium prausnitzii	EC2.6.1.1	Aspartate transaminase	0.316957	0.133253	0.02	0.08	-0.213554	0.0833416	0.01	0.05
Total phytosterol	Faecalibacterium prausnitzii	EC2.6.1.11	Acetylornithine transaminase	0.286752	0.12151	0.02	0.08	-0.191592	0.0757627	0.01	0.05
Total phytosterol	Faecalibacterium prausnitzii	EC2.6.1.16	Glutamine--fructose-6-phosphate transaminase (isomerizing)	0.286111	0.126178	0.02	0.08	-0.200601	0.0786169	0.01	0.05
Total phytosterol	Faecalibacterium prausnitzii	EC2.6.1.42	Branched-chain-amino-acid transaminase	0.301682	0.118892	0.01	0.08	-0.192418	0.0747566	0.01	0.05
Total phytosterol	Faecalibacterium prausnitzii	EC2.6.1.52	Phosphoserine transaminase	0.27923	0.114228	0.01	0.08	-0.187538	0.0716031	0.009	0.05
Total phytosterol	Faecalibacterium prausnitzii	EC2.6.1.83	LL-diaminopimelate aminotransferase	0.313071	0.115358	0.007	0.08	-0.186363	0.072495	0.01	0.05
Total phytosterol	Faecalibacterium prausnitzii	EC2.6.1.9	Histidinol-phosphate transaminase	0.390838	0.152584	0.01	0.08	-0.213505	0.0944548	0.02	0.05
Total phytosterol	Faecalibacterium prausnitzii	EC2.7.1.107	Diacylglycerol kinase (ATP)	0.223148	0.16201	0.17	0.26	-0.0346635	0.0993688	0.73	0.74
Total phytosterol	Faecalibacterium prausnitzii	EC2.7.1.11	6-phosphofructokinase	0.315758	0.155738	0.04	0.1	-0.247015	0.0970585	0.01	0.05
Total phytosterol	Faecalibacterium prausnitzii	EC2.7.1.156	Adenosylcobinamide kinase	0.361113	0.133953	0.007	0.08	-0.263557	0.0834126	0.002	0.03
Total phytosterol	Faecalibacterium prausnitzii	EC2.7.1.162	N-acetylhexosamine 1-kinase	0.333959	0.125867	0.008	0.08	-0.174736	0.0793352	0.03	0.06
Total phytosterol	Faecalibacterium prausnitzii	EC2.7.1.165	Glycerate 2-kinase	0.382931	0.20817	0.07	0.12	-0.416971	0.128691	0.001	0.03
Total phytosterol	Faecalibacterium prausnitzii	EC2.7.1.17	Xylulokinase	0.553382	0.250306	0.03	0.09	-0.330337	0.154324	0.03	0.06
Total phytosterol	Faecalibacterium prausnitzii	EC2.7.1.191	NO_NAME	0.341777	0.173981	0.05	0.11	-0.294834	0.107222	0.006	0.04
Total phytosterol	Faecalibacterium prausnitzii	EC2.7.1.192	NO_NAME	0.311535	0.217696	0.15	0.24	0.0394192	0.131271	0.76	0.77
Total phytosterol	Faecalibacterium prausnitzii	EC2.7.1.199	NO_NAME	0.364082	0.19666	0.06	0.12	-0.599729	0.119837	<0.001	<0.001
Total phytosterol	Faecalibacterium prausnitzii	EC2.7.1.2	Glucokinase	0.285215	0.144023	0.05	0.1	-0.213565	0.0895443	0.02	0.05
Total phytosterol	Faecalibacterium prausnitzii	EC2.7.1.201	NO_NAME	0.384868	0.273831	0.16	0.25	-0.523044	0.165406	0.002	0.03
Total phytosterol	Faecalibacterium prausnitzii	EC2.7.1.24	Dephospho-CoA kinase	0.341002	0.150369	0.02	0.08	-0.293194	0.093202	0.002	0.03
Total phytosterol	Faecalibacterium prausnitzii	EC2.7.1.25	Adenylyl-sulfate kinase	0.246621	0.118402	0.04	0.09	-0.206438	0.0742292	0.005	0.04
Total phytosterol	Faecalibacterium prausnitzii	EC2.7.1.30	Glycerol kinase	0.311552	0.154761	0.04	0.1	-0.213313	0.0958164	0.03	0.05
Total phytosterol	Faecalibacterium prausnitzii	EC2.7.1.33	Pantothenate kinase	0.356965	0.125504	0.004	0.08	-0.225402	0.0786998	0.004	0.04
Total phytosterol	Faecalibacterium prausnitzii	EC2.7.1.35	Pyridoxal kinase	0.378185	0.163729	0.02	0.08	-0.0913242	0.101117	0.37	0.38
Total phytosterol	Faecalibacterium prausnitzii	EC2.7.1.39	Homoserine kinase	0.323363	0.133899	0.02	0.08	-0.199591	0.0833102	0.02	0.05
Total phytosterol	Faecalibacterium prausnitzii	EC2.7.1.4	Fructokinase	0.311175	0.195713	0.11	0.19	-0.424103	0.119218	<0.001	0.01
Total phytosterol	Faecalibacterium prausnitzii	EC2.7.1.40	Pyruvate kinase	0.320852	0.12277	0.009	0.08	-0.188926	0.0768082	0.01	0.05
Total phytosterol	Faecalibacterium prausnitzii	EC2.7.1.48	Uridine kinase	0.350974	0.162507	0.03	0.09	-0.235135	0.100583	0.02	0.05
Total phytosterol	Faecalibacterium prausnitzii	EC2.7.1.5	Rhamnulokinase	0.461886	0.229498	0.04	0.1	-0.0510984	0.140794	0.72	0.73
Total phytosterol	Faecalibacterium prausnitzii	EC2.7.1.56	1-phosphofructokinase	0.349271	0.233952	0.14	0.22	-0.495064	0.143961	<0.001	0.02
Total phytosterol	Faecalibacterium prausnitzii	EC2.7.1.6	Galactokinase	0.304456	0.15051	0.04	0.1	-0.173601	0.0930981	0.06	0.08
Total phytosterol	Faecalibacterium prausnitzii	EC2.7.1.69	Protein-N(pi)-phosphohistidine--sugar phosphotransferase	0.363989	0.227592	0.11	0.18	-0.464896	0.139303	<0.001	0.02
Total phytosterol	Faecalibacterium prausnitzii	EC2.7.1.71	Shikimate kinase	0.299661	0.123049	0.01	0.08	-0.206064	0.0770565	0.007	0.04
Total phytosterol	Faecalibacterium prausnitzii	EC2.7.1.83	Pseudouridine kinase	0.440369	0.183122	0.02	0.08	-0.254011	0.112354	0.02	0.05
Total phytosterol	Faecalibacterium prausnitzii	EC2.7.1.85	Beta-glucoside kinase	0.428355	0.159524	0.007	0.08	-0.181126	0.0986238	0.07	0.09
Total phytosterol	Faecalibacterium prausnitzii	EC2.7.1.90	Diphosphate--fructose-6-phosphate 1-phosphotransferase	0.242853	0.118752	0.04	0.1	-0.158155	0.0743268	0.03	0.06
Total phytosterol	Faecalibacterium prausnitzii	EC2.7.1.92	5-dehydro-2-deoxygluconokinase	0.374877	0.139123	0.007	0.08	-0.198364	0.0871527	0.02	0.05
Total phytosterol	Faecalibacterium prausnitzii	EC2.7.10.2	Non-specific protein-tyrosine kinase	0.386581	0.165672	0.02	0.08	-0.0570253	0.102506	0.58	0.59
Total phytosterol	Faecalibacterium prausnitzii	EC2.7.11.1	Non-specific serine/threonine protein kinase	0.334423	0.149035	0.02	0.09	-0.159388	0.0932299	0.09	0.11
Total phytosterol	Faecalibacterium prausnitzii	EC2.7.11.25	Mitogen-activated protein kinase kinase kinase	0.0992653	0.211483	0.64	0.8	0.137375	0.126852	0.28	0.29
Total phytosterol	Faecalibacterium prausnitzii	EC2.7.13.3	Histidine kinase	0.279081	0.123789	0.02	0.09	-0.2057	0.0772937	0.008	0.05
Total phytosterol	Faecalibacterium prausnitzii	EC2.7.2.1	Acetate kinase	0.388191	0.133352	0.004	0.08	-0.29382	0.0838689	<0.001	0.02
Total phytosterol	Faecalibacterium prausnitzii	EC2.7.2.11	Glutamate 5-kinase	0.312207	0.138241	0.02	0.08	-0.227816	0.0859269	0.008	0.05
Total phytosterol	Faecalibacterium prausnitzii	EC2.7.2.3	Phosphoglycerate kinase	0.275817	0.128771	0.03	0.09	-0.181841	0.0806703	0.02	0.05
Total phytosterol	Faecalibacterium prausnitzii	EC2.7.2.4	Aspartate kinase	0.308808	0.134304	0.02	0.08	-0.238514	0.0839414	0.004	0.04
Total phytosterol	Faecalibacterium prausnitzii	EC2.7.3.9	Phosphoenolpyruvate--protein phosphotransferase	0.314713	0.14396	0.03	0.09	-0.222268	0.0898102	0.01	0.05
Total phytosterol	Faecalibacterium prausnitzii	EC2.7.4.1	Polyphosphate kinase	0.468879	0.160494	0.003	0.08	-0.428698	0.0990008	<0.001	0.002
Total phytosterol	Faecalibacterium prausnitzii	EC2.7.4.8	Guanylate kinase	0.333358	0.124582	0.007	0.08	-0.161321	0.078178	0.04	0.06
Total phytosterol	Faecalibacterium prausnitzii	EC2.7.6.1	Ribose-phosphate diphosphokinase	0.403369	0.148722	0.007	0.08	-0.161143	0.0921221	0.08	0.1
Total phytosterol	Faecalibacterium prausnitzii	EC2.7.6.2	Thiamine diphosphokinase	0.378026	0.132523	0.004	0.08	-0.226369	0.0828445	0.006	0.04
Total phytosterol	Faecalibacterium prausnitzii	EC2.7.6.5	GTP diphosphokinase	0.320308	0.15184	0.03	0.09	-0.267676	0.0937974	0.004	0.04
Total phytosterol	Faecalibacterium prausnitzii	EC2.7.7.12	UDP-glucose--hexose-1-phosphate uridylyltransferase	0.260842	0.113955	0.02	0.08	-0.14969	0.0713739	0.04	0.06
Total phytosterol	Faecalibacterium prausnitzii	EC2.7.7.18	Nicotinate-nucleotide adenylyltransferase	0.440825	0.167678	0.009	0.08	-0.242433	0.104072	0.02	0.05
Total phytosterol	Faecalibacterium prausnitzii	EC2.7.7.2	FAD synthetase	0.330064	0.151011	0.03	0.09	-0.228094	0.0938031	0.02	0.05
Total phytosterol	Faecalibacterium prausnitzii	EC2.7.7.21	Transferred entry	0.179311	0.167751	0.29	0.42	-0.106417	0.103599	0.3	0.32
Total phytosterol	Faecalibacterium prausnitzii	EC2.7.7.24	Glucose-1-phosphate thymidylyltransferase	0.256859	0.119884	0.03	0.09	-0.169011	0.0753019	0.02	0.05
Total phytosterol	Faecalibacterium prausnitzii	EC2.7.7.41	Phosphatidate cytidylyltransferase	0.309165	0.128049	0.02	0.08	-0.170466	0.0797464	0.03	0.06
Total phytosterol	Faecalibacterium prausnitzii	EC2.7.7.49	RNA-directed DNA polymerase	0.360745	0.236073	0.13	0.21	-0.494746	0.143113	<0.001	0.02
Total phytosterol	Faecalibacterium prausnitzii	EC2.7.7.6	DNA-directed RNA polymerase	0.31348	0.148788	0.04	0.09	-0.23618	0.0927927	0.01	0.05
Total phytosterol	Faecalibacterium prausnitzii	EC2.7.7.60	2-C-methyl-D-erythritol 4-phosphate cytidylyltransferase	0.279583	0.127918	0.03	0.09	-0.184383	0.0791501	0.02	0.05
Total phytosterol	Faecalibacterium prausnitzii	EC2.7.7.7	DNA-directed DNA polymerase	0.319677	0.133262	0.02	0.08	-0.197193	0.0837177	0.02	0.05
Total phytosterol	Faecalibacterium prausnitzii	EC2.7.7.72	CCA tRNA nucleotidyltransferase	0.451685	0.175544	0.01	0.08	-0.302042	0.109204	0.006	0.04
Total phytosterol	Faecalibacterium prausnitzii	EC2.7.7.73	Sulfur carrier protein ThiS adenylyltransferase	0.265813	0.128189	0.04	0.1	-0.190551	0.0798695	0.02	0.05
Total phytosterol	Faecalibacterium prausnitzii	EC2.7.7.8	Polyribonucleotide nucleotidyltransferase	0.288363	0.125097	0.02	0.08	-0.18372	0.0784116	0.02	0.05
Total phytosterol	Faecalibacterium prausnitzii	EC2.7.7.87	L-threonylcarbamoyladenylate synthase	0.291675	0.116034	0.01	0.08	-0.253808	0.0722362	<0.001	0.02
Total phytosterol	Faecalibacterium prausnitzii	EC2.7.7.9	UTP--glucose-1-phosphate uridylyltransferase	0.32873	0.128934	0.01	0.08	-0.192866	0.0805331	0.02	0.05
Total phytosterol	Faecalibacterium prausnitzii	EC2.7.8.26	Adenosylcobinamide-GDP ribazoletransferase	0.407891	0.137348	0.003	0.08	-0.211055	0.0860999	0.01	0.05
Total phytosterol	Faecalibacterium prausnitzii	EC2.7.8.5	CDP-diacylglycerol--glycerol-3-phosphate 3-phosphatidyltransferase	0.298479	0.126138	0.02	0.08	-0.175345	0.0793123	0.03	0.06
Total phytosterol	Faecalibacterium prausnitzii	EC2.7.8.7	Holo-[acyl-carrier-protein] synthase	0.303778	0.136213	0.03	0.09	-0.231716	0.0849697	0.006	0.04
Total phytosterol	Faecalibacterium prausnitzii	EC2.7.9.3	Selenide, water dikinase	0.325517	0.136482	0.02	0.08	-0.193923	0.0850899	0.02	0.05
Total phytosterol	Faecalibacterium prausnitzii	EC2.8.1.1	Thiosulfate sulfurtransferase	0.27716	0.22886	0.23	0.34	-0.0786613	0.140303	0.58	0.59
Total phytosterol	Faecalibacterium prausnitzii	EC2.8.1.13	tRNA-uridine 2-sulfurtransferase	0.288649	0.127315	0.02	0.08	-0.19479	0.0796778	0.01	0.05
Total phytosterol	Faecalibacterium prausnitzii	EC2.8.1.6	Biotin synthase	0.504339	0.317527	0.11	0.19	-0.0364536	0.19172	0.85	0.85
Total phytosterol	Faecalibacterium prausnitzii	EC2.8.3.16	Formyl-CoA transferase	0.267408	0.290096	0.36	0.52	-0.487687	0.17639	0.006	0.04
Total phytosterol	Faecalibacterium prausnitzii	EC3.1.1.1	Carboxylesterase	0.173983	0.168373	0.3	0.45	-0.22122	0.104282	0.03	0.06
Total phytosterol	Faecalibacterium prausnitzii	EC3.1.1.10	Tropinesterase	0.827231	0.230684	<0.001	0.08	-0.393494	0.141767	0.006	0.04
Total phytosterol	Faecalibacterium prausnitzii	EC3.1.1.11	Pectinesterase	0.311191	0.132654	0.02	0.08	-0.187911	0.0831302	0.02	0.05
Total phytosterol	Faecalibacterium prausnitzii	EC3.1.11.2	Exodeoxyribonuclease III	0.408383	0.136959	0.003	0.08	-0.201508	0.0860087	0.02	0.05
Total phytosterol	Faecalibacterium prausnitzii	EC3.1.11.5	Exodeoxyribonuclease V	0.235107	0.177635	0.19	0.29	-0.187154	0.110671	0.09	0.11
Total phytosterol	Faecalibacterium prausnitzii	EC3.1.11.6	Exodeoxyribonuclease VII	0.301711	0.148033	0.04	0.1	-0.215048	0.0917502	0.02	0.05
Total phytosterol	Faecalibacterium prausnitzii	EC3.1.12.1	5' to 3' exodeoxyribonuclease (nucleoside 3'-phosphate-forming)	0.281419	0.174433	0.11	0.18	-0.286755	0.108093	0.008	0.05
Total phytosterol	Faecalibacterium prausnitzii	EC3.1.13.1	Exoribonuclease II	0.325387	0.130756	0.01	0.08	-0.213729	0.0820002	0.009	0.05
Total phytosterol	Faecalibacterium prausnitzii	EC3.1.2.6	Hydroxyacylglutathione hydrolase	0.285977	0.150931	0.06	0.11	-0.138251	0.0941827	0.14	0.16
Total phytosterol	Faecalibacterium prausnitzii	EC3.1.21.2	Deoxyribonuclease IV	0.352634	0.156706	0.02	0.09	-0.210497	0.0966354	0.03	0.06
Total phytosterol	Faecalibacterium prausnitzii	EC3.1.21.3	Type I site-specific deoxyribonuclease	0.554373	0.204859	0.007	0.08	-0.39502	0.126928	0.002	0.03
Total phytosterol	Faecalibacterium prausnitzii	EC3.1.22.4	Crossover junction endodeoxyribonuclease	0.282423	0.124353	0.02	0.08	-0.210564	0.0779549	0.007	0.04
Total phytosterol	Faecalibacterium prausnitzii	EC3.1.26.11	Ribonuclease Z	0.307223	0.133581	0.02	0.08	-0.192642	0.0832514	0.02	0.05
Total phytosterol	Faecalibacterium prausnitzii	EC3.1.26.3	Ribonuclease III	0.308746	0.144812	0.03	0.09	-0.232904	0.0901308	0.01	0.05
Total phytosterol	Faecalibacterium prausnitzii	EC3.1.26.5	Ribonuclease P	0.450462	0.193238	0.02	0.08	-0.350037	0.117363	0.003	0.04
Total phytosterol	Faecalibacterium prausnitzii	EC3.1.26.8	Ribonuclease M5	0.340058	0.237172	0.15	0.24	-0.564708	0.145666	<0.001	0.006
Total phytosterol	Faecalibacterium prausnitzii	EC3.1.3.11	Fructose-bisphosphatase	0.305602	0.129303	0.02	0.08	-0.220199	0.080361	0.006	0.04
Total phytosterol	Faecalibacterium prausnitzii	EC3.1.3.15	Histidinol-phosphatase	0.296174	0.128947	0.02	0.08	-0.227849	0.0806733	0.005	0.04
Total phytosterol	Faecalibacterium prausnitzii	EC3.1.3.16	Protein-serine/threonine phosphatase	0.440553	0.167248	0.008	0.08	-0.1548	0.103614	0.14	0.15
Total phytosterol	Faecalibacterium prausnitzii	EC3.1.3.18	Phosphoglycolate phosphatase	0.31411	0.131268	0.02	0.08	-0.244577	0.081853	0.003	0.04
Total phytosterol	Faecalibacterium prausnitzii	EC3.1.3.3	Phosphoserine phosphatase	0.414338	0.210929	0.05	0.11	-0.170609	0.128824	0.19	0.2
Total phytosterol	Faecalibacterium prausnitzii	EC3.1.3.5	5'-nucleotidase	0.4228	0.204903	0.04	0.1	-0.288031	0.125423	0.02	0.05
Total phytosterol	Faecalibacterium prausnitzii	EC3.1.3.73	Adenosylcobalamin/alpha-ribazole phosphatase	0.312329	0.13099	0.02	0.08	-0.20454	0.0818324	0.01	0.05
Total phytosterol	Faecalibacterium prausnitzii	EC3.1.3.89	5'-deoxynucleotidase	0.247406	0.17979	0.17	0.26	-0.267603	0.110327	0.02	0.05
Total phytosterol	Faecalibacterium prausnitzii	EC3.1.4.46	Glycerophosphodiester phosphodiesterase	0.383451	0.180305	0.03	0.09	-0.0487738	0.110744	0.66	0.67
Total phytosterol	Faecalibacterium prausnitzii	EC3.1.4.52	Cyclic-guanylate-specific phosphodiesterase	0.479412	0.164746	0.004	0.08	-0.134336	0.10235	0.19	0.2
Total phytosterol	Faecalibacterium prausnitzii	EC3.1.4.53	3',5'-cyclic-AMP phosphodiesterase	0.446481	0.152704	0.003	0.08	-0.427267	0.0943951	<0.001	0.002
Total phytosterol	Faecalibacterium prausnitzii	EC3.1.5.1	dGTPase	0.227223	0.201496	0.26	0.39	-0.26617	0.123353	0.03	0.06
Total phytosterol	Faecalibacterium prausnitzii	EC3.2.1.122	Maltose-6'-phosphate glucosidase	0.387674	0.216836	0.07	0.14	-0.104478	0.133159	0.43	0.44
Total phytosterol	Faecalibacterium prausnitzii	EC3.2.1.135	Neopullulanase	0.165925	0.213854	0.44	0.62	0.204751	0.129095	0.11	0.13
Total phytosterol	Faecalibacterium prausnitzii	EC3.2.1.17	Lysozyme	0.529413	0.166692	0.001	0.08	-0.268908	0.103206	0.009	0.05
Total phytosterol	Faecalibacterium prausnitzii	EC3.2.1.21	Beta-glucosidase	0.346367	0.164852	0.04	0.09	-0.210613	0.102281	0.04	0.06
Total phytosterol	Faecalibacterium prausnitzii	EC3.2.1.23	Beta-galactosidase	0.35643	0.134252	0.008	0.08	-0.219234	0.0836587	0.009	0.05
Total phytosterol	Faecalibacterium prausnitzii	EC3.2.1.26	Beta-fructofuranosidase	0.594441	0.182527	0.001	0.08	-0.369612	0.11316	0.001	0.02
Total phytosterol	Faecalibacterium prausnitzii	EC3.2.1.31	Beta-glucuronidase	0.574016	0.239311	0.02	0.08	-0.337111	0.146512	0.02	0.05
Total phytosterol	Faecalibacterium prausnitzii	EC3.2.1.37	Xylan 1,4-beta-xylosidase	0.491242	0.18929	0.009	0.08	-0.305454	0.115723	0.008	0.05
Total phytosterol	Faecalibacterium prausnitzii	EC3.2.1.4	Cellulase	0.668725	0.199521	<0.001	0.08	-0.330621	0.123795	0.008	0.04
Total phytosterol	Faecalibacterium prausnitzii	EC3.2.1.41	Pullulanase	0.274484	0.13377	0.04	0.1	-0.181908	0.0827344	0.03	0.06
Total phytosterol	Faecalibacterium prausnitzii	EC3.2.1.54	Cyclomaltodextrinase	0.550443	0.183809	0.003	0.08	-0.367812	0.113621	0.001	0.03
Total phytosterol	Faecalibacterium prausnitzii	EC3.2.1.86	6-phospho-beta-glucosidase	0.372489	0.15711	0.02	0.08	-0.1958	0.0975277	0.04	0.07
Total phytosterol	Faecalibacterium prausnitzii	EC3.2.1.93	Alpha,alpha-phosphotrehalase	0.338652	0.242217	0.16	0.25	-0.339531	0.14762	0.02	0.05
Total phytosterol	Faecalibacterium prausnitzii	EC3.2.2.15	DNA-deoxyinosine glycosylase	0.415044	0.181534	0.02	0.08	-0.300637	0.111606	0.007	0.04
Total phytosterol	Faecalibacterium prausnitzii	EC3.2.2.21	DNA-3-methyladenine glycosylase II	0.284258	0.195778	0.15	0.23	-0.32635	0.120631	0.007	0.04
Total phytosterol	Faecalibacterium prausnitzii	EC3.2.2.24	ADP-ribosyl-[dinitrogen reductase] hydrolase	0.269953	0.135964	0.05	0.1	-0.288256	0.0838488	<0.001	0.02
Total phytosterol	Faecalibacterium prausnitzii	EC3.2.2.27	Uracil-DNA glycosylase	0.419801	0.222805	0.06	0.12	-0.424994	0.138856	0.002	0.03
Total phytosterol	Faecalibacterium prausnitzii	EC3.2.2.31	NO_NAME	0.32451	0.124568	0.009	0.08	-0.228441	0.0776814	0.003	0.04
Total phytosterol	Faecalibacterium prausnitzii	EC3.2.2.9	Adenosylhomocysteine nucleosidase	0.30566	0.124776	0.01	0.08	-0.209966	0.0779568	0.007	0.04
Total phytosterol	Faecalibacterium prausnitzii	EC3.2.2.n1	Cytokinin riboside 5'-monophosphate phosphoribohydrolase	0.356983	0.139774	0.01	0.08	-0.176026	0.0869103	0.04	0.07
Total phytosterol	Faecalibacterium prausnitzii	EC3.4.11.18	Methionyl aminopeptidase	0.299065	0.115121	0.009	0.08	-0.189644	0.0721853	0.009	0.05
Total phytosterol	Faecalibacterium prausnitzii	EC3.4.11.4	Tripeptide aminopeptidase	0.343876	0.14726	0.02	0.08	-0.227353	0.0915358	0.01	0.05
Total phytosterol	Faecalibacterium prausnitzii	EC3.4.11.5	Prolyl aminopeptidase	0.388603	0.172137	0.02	0.08	-0.427612	0.104641	<0.001	0.004
Total phytosterol	Faecalibacterium prausnitzii	EC3.4.11.9	Xaa-Pro aminopeptidase	0.286913	0.204133	0.16	0.25	-0.202702	0.125559	0.11	0.12
Total phytosterol	Faecalibacterium prausnitzii	EC3.4.13.19	Membrane dipeptidase	0.251379	0.171428	0.14	0.23	-0.242851	0.105442	0.02	0.05
Total phytosterol	Faecalibacterium prausnitzii	EC3.4.13.21	Dipeptidase E	0.526458	0.152393	<0.001	0.08	-0.334501	0.0950221	<0.001	0.02
Total phytosterol	Faecalibacterium prausnitzii	EC3.4.16.4	Serine-type D-Ala-D-Ala carboxypeptidase	0.334765	0.144183	0.02	0.08	-0.153034	0.0896998	0.09	0.11
Total phytosterol	Faecalibacterium prausnitzii	EC3.4.17.14	Zinc D-Ala-D-Ala carboxypeptidase	0.370647	0.199008	0.06	0.12	-0.156748	0.121689	0.2	0.21
Total phytosterol	Faecalibacterium prausnitzii	EC3.4.17.19	Carboxypeptidase Taq	0.371721	0.213258	0.08	0.15	-0.517654	0.131019	<0.001	0.006
Total phytosterol	Faecalibacterium prausnitzii	EC3.4.19.11	Gamma-D-glutamyl-meso-diaminopimelate peptidase	0.513975	0.217612	0.02	0.08	-0.647595	0.133034	<0.001	<0.001
Total phytosterol	Faecalibacterium prausnitzii	EC3.4.21.88	Repressor LexA	0.277759	0.136372	0.04	0.1	-0.189146	0.0852178	0.03	0.05
Total phytosterol	Faecalibacterium prausnitzii	EC3.4.21.89	Signal peptidase I	0.273419	0.126587	0.03	0.09	-0.18885	0.0791076	0.02	0.05
Total phytosterol	Faecalibacterium prausnitzii	EC3.4.23.36	Signal peptidase II	0.331296	0.127289	0.009	0.08	-0.153148	0.0797808	0.05	0.08
Total phytosterol	Faecalibacterium prausnitzii	EC3.4.24.75	Lysostaphin	0.523701	0.315845	0.1	0.17	0.0229105	0.190243	0.9	0.91
Total phytosterol	Faecalibacterium prausnitzii	EC3.4.25.2	HslU--HslV peptidase	0.318679	0.158013	0.04	0.1	-0.270412	0.0977077	0.006	0.04
Total phytosterol	Faecalibacterium prausnitzii	EC3.5.1.18	Succinyl-diaminopimelate desuccinylase	0.379631	0.167447	0.02	0.08	-0.17112	0.103689	0.1	0.12
Total phytosterol	Faecalibacterium prausnitzii	EC3.5.1.2	Glutaminase	0.441822	0.181659	0.02	0.08	-0.264443	0.112803	0.02	0.05
Total phytosterol	Faecalibacterium prausnitzii	EC3.5.1.25	N-acetylglucosamine-6-phosphate deacetylase	0.373628	0.173166	0.03	0.09	-0.300627	0.106085	0.005	0.04
Total phytosterol	Faecalibacterium prausnitzii	EC3.5.1.28	N-acetylmuramoyl-L-alanine amidase	0.406166	0.150931	0.007	0.08	-0.050668	0.0929652	0.59	0.6
Total phytosterol	Faecalibacterium prausnitzii	EC3.5.1.88	Peptide deformylase	0.261027	0.133989	0.05	0.11	-0.189469	0.0835797	0.02	0.05
Total phytosterol	Faecalibacterium prausnitzii	EC3.5.2.3	Dihydroorotase	0.351588	0.131467	0.007	0.08	-0.278642	0.0815945	<0.001	0.02
Total phytosterol	Faecalibacterium prausnitzii	EC3.5.2.6	Beta-lactamase	0.350235	0.197149	0.08	0.14	-0.472766	0.121188	<0.001	0.006
Total phytosterol	Faecalibacterium prausnitzii	EC3.5.3.11	Agmatinase	0.435715	0.165805	0.009	0.08	-0.236143	0.102708	0.02	0.05
Total phytosterol	Faecalibacterium prausnitzii	EC3.5.4.10	IMP cyclohydrolase	0.303185	0.116369	0.009	0.08	-0.160621	0.0729051	0.03	0.06
Total phytosterol	Faecalibacterium prausnitzii	EC3.5.4.12	dCMP deaminase	0.274473	0.124509	0.03	0.09	-0.23329	0.0774647	0.003	0.04
Total phytosterol	Faecalibacterium prausnitzii	EC3.5.4.2	Adenine deaminase	0.293184	0.123541	0.02	0.08	-0.167831	0.0770664	0.03	0.06
Total phytosterol	Faecalibacterium prausnitzii	EC3.5.4.33	tRNA(adenine(34)) deaminase	0.289982	0.136693	0.03	0.09	-0.287688	0.0848211	<0.001	0.02
Total phytosterol	Faecalibacterium prausnitzii	EC3.5.4.5	Cytidine deaminase	0.370601	0.153027	0.02	0.08	-0.175502	0.0956073	0.07	0.09
Total phytosterol	Faecalibacterium prausnitzii	EC3.5.4.9	Methenyltetrahydrofolate cyclohydrolase	0.299808	0.128883	0.02	0.08	-0.154802	0.080398	0.05	0.08
Total phytosterol	Faecalibacterium prausnitzii	EC3.5.99.10	2-iminobutanoate/2-iminopropanoate deaminase	0.53507	0.219125	0.01	0.08	-0.494099	0.13513	<0.001	0.01
Total phytosterol	Faecalibacterium prausnitzii	EC3.5.99.2	Aminopyrimidine aminohydrolase	0.269719	0.16217	0.1	0.17	-0.0552088	0.0998237	0.58	0.59
Total phytosterol	Faecalibacterium prausnitzii	EC3.5.99.6	Glucosamine-6-phosphate deaminase	0.26172	0.136282	0.05	0.11	-0.133199	0.08439	0.11	0.13
Total phytosterol	Faecalibacterium prausnitzii	EC3.6.1.1	Inorganic diphosphatase	0.253207	0.128771	0.05	0.11	-0.190674	0.079874	0.02	0.05
Total phytosterol	Faecalibacterium prausnitzii	EC3.6.1.13	ADP-ribose diphosphatase	0.413928	0.180195	0.02	0.08	-0.130263	0.111057	0.24	0.25
Total phytosterol	Faecalibacterium prausnitzii	EC3.6.1.22	NAD(+) diphosphatase	0.451519	0.161475	0.005	0.08	-0.16639	0.10035	0.1	0.12
Total phytosterol	Faecalibacterium prausnitzii	EC3.6.1.23	dUTP diphosphatase	0.339265	0.123986	0.006	0.08	-0.19943	0.0775052	0.01	0.05
Total phytosterol	Faecalibacterium prausnitzii	EC3.6.1.27	Undecaprenyl-diphosphate phosphatase	0.268446	0.130651	0.04	0.1	-0.186715	0.0814043	0.02	0.05
Total phytosterol	Faecalibacterium prausnitzii	EC3.6.1.3	Adenosinetriphosphatase	0.201591	0.128237	0.12	0.19	-0.11367	0.0798702	0.15	0.17
Total phytosterol	Faecalibacterium prausnitzii	EC3.6.1.31	Phosphoribosyl-ATP diphosphatase	0.281056	0.128852	0.03	0.09	-0.176177	0.0803175	0.03	0.06
Total phytosterol	Faecalibacterium prausnitzii	EC3.6.1.55	8-oxo-dGTP diphosphatase	0.520504	0.193579	0.007	0.08	-0.319244	0.119338	0.007	0.04
Total phytosterol	Faecalibacterium prausnitzii	EC3.6.1.66	XTP/dITP diphosphatase	0.331201	0.122581	0.007	0.08	-0.160737	0.0772697	0.04	0.06
Total phytosterol	Faecalibacterium prausnitzii	EC3.6.1.7	Acylphosphatase	0.315985	0.148856	0.03	0.09	-0.182872	0.092099	0.05	0.07
Total phytosterol	Faecalibacterium prausnitzii	EC3.6.1.8	ATP diphosphatase	0.299434	0.159286	0.06	0.12	-0.0140258	0.0977696	0.89	0.89
Total phytosterol	Faecalibacterium prausnitzii	EC3.6.1.9	Nucleotide diphosphatase	0.275692	0.127623	0.03	0.09	-0.192472	0.0796584	0.02	0.05
Total phytosterol	Faecalibacterium prausnitzii	EC3.6.3.14	H(+)-transporting two-sector ATPase	0.338736	0.148989	0.02	0.08	-0.236677	0.0927255	0.01	0.05
Total phytosterol	Faecalibacterium prausnitzii	EC3.6.3.17	Monosaccharide-transporting ATPase	0.301143	0.132283	0.02	0.08	-0.204355	0.0830139	0.01	0.05
Total phytosterol	Faecalibacterium prausnitzii	EC3.6.3.2	Magnesium-importing ATPase	-0.0507013	0.395741	0.9	0.95	-0.273698	0.238591	0.25	0.26
Total phytosterol	Faecalibacterium prausnitzii	EC3.6.3.20	Glycerol-3-phosphate-transporting ATPase	0.268543	0.118298	0.02	0.08	-0.16761	0.0744985	0.02	0.05
Total phytosterol	Faecalibacterium prausnitzii	EC3.6.3.21	Polar-amino-acid-transporting ATPase	0.537053	0.227433	0.02	0.08	-0.328527	0.140228	0.02	0.05
Total phytosterol	Faecalibacterium prausnitzii	EC3.6.3.25	Sulfate-transporting ATPase	0.492357	0.205905	0.02	0.08	-0.357793	0.126645	0.005	0.04
Total phytosterol	Faecalibacterium prausnitzii	EC3.6.3.28	Phosphonate-transporting ATPase	0.263242	0.15695	0.09	0.16	-0.315288	0.0964901	0.001	0.02
Total phytosterol	Faecalibacterium prausnitzii	EC3.6.3.29	Molybdate-transporting ATPase	0.493944	0.181728	0.007	0.08	-0.333339	0.111675	0.003	0.04
Total phytosterol	Faecalibacterium prausnitzii	EC3.6.3.3	Cadmium-exporting ATPase	0.345267	0.137566	0.01	0.08	-0.22216	0.0856651	0.01	0.05
Total phytosterol	Faecalibacterium prausnitzii	EC3.6.3.31	Polyamine-transporting ATPase	0.329076	0.145232	0.02	0.08	-0.199573	0.0904184	0.03	0.06
Total phytosterol	Faecalibacterium prausnitzii	EC3.6.3.34	Iron-chelate-transporting ATPase	0.338638	0.191039	0.08	0.14	-0.150913	0.117961	0.2	0.21
Total phytosterol	Faecalibacterium prausnitzii	EC3.6.3.4	Cu(2+)-exporting ATPase	0.358528	0.153184	0.02	0.08	-0.195612	0.0950365	0.04	0.06
Total phytosterol	Faecalibacterium prausnitzii	EC3.6.3.40	Teichoic-acid-transporting ATPase	0.337709	0.123383	0.006	0.08	-0.201128	0.0776346	0.01	0.05
Total phytosterol	Faecalibacterium prausnitzii	EC3.6.3.41	Heme-transporting ATPase	0.369809	0.155806	0.02	0.08	-0.328305	0.0968616	<0.001	0.02
Total phytosterol	Faecalibacterium prausnitzii	EC3.6.3.44	Xenobiotic-transporting ATPase	0.37485	0.138842	0.007	0.08	-0.239298	0.0866211	0.006	0.04
Total phytosterol	Faecalibacterium prausnitzii	EC3.6.3.5	Zinc-exporting ATPase	0.288889	0.197704	0.14	0.23	0.107754	0.119124	0.37	0.38
Total phytosterol	Faecalibacterium prausnitzii	EC3.6.4.12	DNA helicase	0.286171	0.1358	0.04	0.09	-0.210676	0.0847505	0.01	0.05
Total phytosterol	Faecalibacterium prausnitzii	EC3.6.4.13	RNA helicase	0.357065	0.139806	0.01	0.08	-0.276549	0.0873378	0.002	0.03
Total phytosterol	Faecalibacterium prausnitzii	EC3.6.4.3	Microtubule-severing ATPase	0.341989	0.147764	0.02	0.08	-0.253106	0.0921295	0.006	0.04
Total phytosterol	Faecalibacterium prausnitzii	EC3.6.5.3	Protein-synthesizing GTPase	0.296002	0.130706	0.02	0.08	-0.254218	0.0819642	0.002	0.03
Total phytosterol	Faecalibacterium prausnitzii	EC3.8.1.2	(S)-2-haloacid dehalogenase	0.516147	0.24224	0.03	0.09	-0.647975	0.147623	<0.001	0.002
Total phytosterol	Faecalibacterium prausnitzii	EC4.1.1.19	Arginine decarboxylase	0.317259	0.142869	0.03	0.09	-0.187235	0.0892864	0.04	0.06
Total phytosterol	Faecalibacterium prausnitzii	EC4.1.1.20	Diaminopimelate decarboxylase	0.26317	0.123296	0.03	0.09	-0.181936	0.0771247	0.02	0.05
Total phytosterol	Faecalibacterium prausnitzii	EC4.1.1.3	Oxaloacetate decarboxylase	0.314383	0.130312	0.02	0.08	-0.234943	0.0820024	0.004	0.04
Total phytosterol	Faecalibacterium prausnitzii	EC4.1.1.31	Phosphoenolpyruvate carboxylase	0.377959	0.254325	0.14	0.22	-0.398542	0.157228	0.01	0.05
Total phytosterol	Faecalibacterium prausnitzii	EC4.1.1.36	Phosphopantothenoylcysteine decarboxylase	0.33082	0.145324	0.02	0.08	-0.238601	0.0901298	0.008	0.05
Total phytosterol	Faecalibacterium prausnitzii	EC4.1.1.37	Uroporphyrinogen decarboxylase	0.246554	0.157889	0.12	0.19	-0.260527	0.0980639	0.008	0.05
Total phytosterol	Faecalibacterium prausnitzii	EC4.1.1.39	Ribulose-bisphosphate carboxylase	0.461536	0.189394	0.01	0.08	-0.327611	0.115239	0.004	0.04
Total phytosterol	Faecalibacterium prausnitzii	EC4.1.1.41	Methylmalonyl-CoA decarboxylase	0.408476	0.239815	0.09	0.16	-0.416587	0.147663	0.005	0.04
Total phytosterol	Faecalibacterium prausnitzii	EC4.1.1.49	Phosphoenolpyruvate carboxykinase (ATP)	0.325036	0.134355	0.02	0.08	-0.221363	0.0842942	0.009	0.05
Total phytosterol	Faecalibacterium prausnitzii	EC4.1.2.13	Fructose-bisphosphate aldolase	0.305688	0.127895	0.02	0.08	-0.229225	0.0799651	0.004	0.04
Total phytosterol	Faecalibacterium prausnitzii	EC4.1.2.19	Rhamnulose-1-phosphate aldolase	0.566245	0.279706	0.04	0.1	-0.166522	0.169933	0.33	0.34
Total phytosterol	Faecalibacterium prausnitzii	EC4.1.2.4	Deoxyribose-phosphate aldolase	0.337189	0.125859	0.007	0.08	-0.234453	0.0790465	0.003	0.04
Total phytosterol	Faecalibacterium prausnitzii	EC4.1.2.40	Tagatose-bisphosphate aldolase	0.439908	0.308003	0.15	0.24	-0.689648	0.186596	<0.001	0.01
Total phytosterol	Faecalibacterium prausnitzii	EC4.1.2.48	Low-specificity L-threonine aldolase	0.463689	0.199656	0.02	0.08	-0.119418	0.12213	0.33	0.34
Total phytosterol	Faecalibacterium prausnitzii	EC4.1.2.5	L-threonine aldolase	0.30784	0.204634	0.13	0.22	-0.40534	0.126204	0.001	0.03
Total phytosterol	Faecalibacterium prausnitzii	EC4.1.2.9	Phosphoketolase	0.381258	0.200491	0.06	0.11	-0.250241	0.122727	0.04	0.07
Total phytosterol	Faecalibacterium prausnitzii	EC4.1.3.16	4-hydroxy-2-oxoglutarate aldolase	0.296871	0.127273	0.02	0.08	-0.22027	0.0797099	0.006	0.04
Total phytosterol	Faecalibacterium prausnitzii	EC4.1.3.3	N-acetylneuraminate lyase	0.304013	0.115354	0.008	0.08	-0.217568	0.0721787	0.003	0.04
Total phytosterol	Faecalibacterium prausnitzii	EC4.1.3.6	Citrate (pro-3S)-lyase	0.302948	0.193135	0.12	0.19	-0.447717	0.118696	<0.001	0.009
Total phytosterol	Faecalibacterium prausnitzii	EC4.1.99.12	3,4-dihydroxy-2-butanone-4-phosphate synthase	0.382614	0.198262	0.05	0.11	-0.443968	0.122084	<0.001	0.01
Total phytosterol	Faecalibacterium prausnitzii	EC4.2.1.1	Carbonate dehydratase	0.293187	0.216441	0.18	0.27	-0.433405	0.132266	0.001	0.02
Total phytosterol	Faecalibacterium prausnitzii	EC4.2.1.10	3-dehydroquinate dehydratase	0.277194	0.139319	0.05	0.1	-0.187896	0.0866639	0.03	0.06
Total phytosterol	Faecalibacterium prausnitzii	EC4.2.1.11	Phosphopyruvate hydratase	0.327796	0.123084	0.008	0.08	-0.23703	0.0769836	0.002	0.03
Total phytosterol	Faecalibacterium prausnitzii	EC4.2.1.126	N-acetylmuramic acid 6-phosphate etherase	0.283217	0.212006	0.18	0.28	0.0307335	0.12845	0.81	0.82
Total phytosterol	Faecalibacterium prausnitzii	EC4.2.1.136	ADP-dependent NAD(P)H-hydrate dehydratase	0.270056	0.146811	0.07	0.12	-0.152733	0.0911717	0.09	0.11
Total phytosterol	Faecalibacterium prausnitzii	EC4.2.1.19	Imidazoleglycerol-phosphate dehydratase	0.43153	0.166047	0.009	0.08	-0.209386	0.103071	0.04	0.07
Total phytosterol	Faecalibacterium prausnitzii	EC4.2.1.2	Fumarate hydratase	0.318599	0.140649	0.02	0.08	-0.24341	0.0875084	0.005	0.04
Total phytosterol	Faecalibacterium prausnitzii	EC4.2.1.3	Aconitate hydratase	0.367429	0.182259	0.04	0.1	-0.215289	0.111512	0.05	0.08
Total phytosterol	Faecalibacterium prausnitzii	EC4.2.1.33	3-isopropylmalate dehydratase	0.331701	0.160237	0.04	0.1	-0.266418	0.0996774	0.008	0.04
Total phytosterol	Faecalibacterium prausnitzii	EC4.2.1.42	Galactarate dehydratase	0.278556	0.14268	0.05	0.11	-0.195421	0.0892217	0.03	0.06
Total phytosterol	Faecalibacterium prausnitzii	EC4.2.1.46	dTDP-glucose 4,6-dehydratase	0.443141	0.195028	0.02	0.08	-0.371873	0.11979	0.002	0.03
Total phytosterol	Faecalibacterium prausnitzii	EC4.2.1.51	Prephenate dehydratase	0.357384	0.152746	0.02	0.08	-0.399779	0.0944129	<0.001	0.003
Total phytosterol	Faecalibacterium prausnitzii	EC4.2.1.53	Oleate hydratase	0.310868	0.124319	0.01	0.08	-0.237904	0.0772542	0.002	0.03
Total phytosterol	Faecalibacterium prausnitzii	EC4.2.1.55	3-hydroxybutyryl-CoA dehydratase	0.324496	0.127331	0.01	0.08	-0.230164	0.0798453	0.004	0.04
Total phytosterol	Faecalibacterium prausnitzii	EC4.2.1.59	3-hydroxyacyl-[acyl-carrier-protein] dehydratase	0.272544	0.119693	0.02	0.08	-0.182489	0.0747495	0.01	0.05
Total phytosterol	Faecalibacterium prausnitzii	EC4.2.1.6	Galactonate dehydratase	0.619185	0.312443	0.05	0.1	-0.797805	0.189889	<0.001	0.003
Total phytosterol	Faecalibacterium prausnitzii	EC4.2.1.8	Mannonate dehydratase	0.544109	0.234275	0.02	0.08	-0.553215	0.143887	<0.001	0.007
Total phytosterol	Faecalibacterium prausnitzii	EC4.2.1.9	Dihydroxy-acid dehydratase	0.379365	0.182002	0.04	0.09	-0.26515	0.113292	0.02	0.05
Total phytosterol	Faecalibacterium prausnitzii	EC4.2.3.1	Threonine synthase	0.283461	0.127441	0.03	0.09	-0.200896	0.0790289	0.01	0.05
Total phytosterol	Faecalibacterium prausnitzii	EC4.2.3.3	Methylglyoxal synthase	0.276416	0.122844	0.02	0.09	-0.165733	0.0771771	0.03	0.06
Total phytosterol	Faecalibacterium prausnitzii	EC4.2.3.4	3-dehydroquinate synthase	0.321923	0.126095	0.01	0.08	-0.247412	0.0789357	0.002	0.03
Total phytosterol	Faecalibacterium prausnitzii	EC4.2.3.5	Chorismate synthase	0.25235	0.127662	0.05	0.1	-0.217885	0.0795943	0.006	0.04
Total phytosterol	Faecalibacterium prausnitzii	EC4.3.1.17	L-serine ammonia-lyase	0.341745	0.130812	0.009	0.08	-0.221019	0.0820248	0.007	0.04
Total phytosterol	Faecalibacterium prausnitzii	EC4.3.1.18	D-serine ammonia-lyase	0.25489	0.183309	0.16	0.26	0.0876734	0.111282	0.43	0.44
Total phytosterol	Faecalibacterium prausnitzii	EC4.3.1.19	Threonine ammonia-lyase	0.30351	0.122801	0.01	0.08	-0.201111	0.076974	0.009	0.05
Total phytosterol	Faecalibacterium prausnitzii	EC4.3.1.3	Histidine ammonia-lyase	0.373474	0.17795	0.04	0.09	-0.142284	0.109257	0.19	0.2
Total phytosterol	Faecalibacterium prausnitzii	EC4.3.2.1	Argininosuccinate lyase	0.274556	0.133294	0.04	0.1	-0.219849	0.082682	0.008	0.05
Total phytosterol	Faecalibacterium prausnitzii	EC4.3.2.10	NO_NAME	0.454378	0.175495	0.01	0.08	-0.254268	0.109061	0.02	0.05
Total phytosterol	Faecalibacterium prausnitzii	EC4.3.2.2	Adenylosuccinate lyase	0.291883	0.126102	0.02	0.08	-0.255982	0.0786688	0.001	0.02
Total phytosterol	Faecalibacterium prausnitzii	EC4.3.3.7	4-hydroxy-tetrahydrodipicolinate synthase	0.320823	0.14238	0.02	0.09	-0.22362	0.0889236	0.01	0.05
Total phytosterol	Faecalibacterium prausnitzii	EC4.4.1.1	Cystathionine gamma-lyase	0.301633	0.118861	0.01	0.08	-0.220345	0.0744138	0.003	0.04
Total phytosterol	Faecalibacterium prausnitzii	EC4.4.1.11	Methionine gamma-lyase	0.24719	0.139647	0.08	0.14	-0.241524	0.0862596	0.005	0.04
Total phytosterol	Faecalibacterium prausnitzii	EC4.4.1.21	S-ribosylhomocysteine lyase	0.342059	0.128965	0.008	0.08	-0.232536	0.0807157	0.004	0.04
Total phytosterol	Faecalibacterium prausnitzii	EC4.4.1.5	Lactoylglutathione lyase	0.357215	0.211001	0.09	0.16	-0.442857	0.129438	<0.001	0.02
Total phytosterol	Faecalibacterium prausnitzii	EC4.4.1.8	Cystathionine beta-lyase	0.540035	0.215274	0.01	0.08	-0.318552	0.131739	0.02	0.05
Total phytosterol	Faecalibacterium prausnitzii	EC4.99.1.3	Sirohydrochlorin cobaltochelatase	0.257563	0.155608	0.1	0.17	-0.159109	0.0964369	0.1	0.12
Total phytosterol	Faecalibacterium prausnitzii	EC5.1.1.1	Alanine racemase	0.34089	0.133996	0.01	0.08	-0.136951	0.0834933	0.1	0.12
Total phytosterol	Faecalibacterium prausnitzii	EC5.1.1.20	L-Ala-D/L-Glu epimerase	0.356092	0.157699	0.02	0.08	-0.428539	0.0976206	<0.001	0.002
Total phytosterol	Faecalibacterium prausnitzii	EC5.1.1.3	Glutamate racemase	0.301322	0.12276	0.01	0.08	-0.173069	0.0771021	0.02	0.05
Total phytosterol	Faecalibacterium prausnitzii	EC5.1.1.7	Diaminopimelate epimerase	0.354386	0.140878	0.01	0.08	-0.168637	0.0880311	0.06	0.08
Total phytosterol	Faecalibacterium prausnitzii	EC5.1.3.1	Ribulose-phosphate 3-epimerase	0.340429	0.130149	0.009	0.08	-0.224281	0.0815377	0.006	0.04
Total phytosterol	Faecalibacterium prausnitzii	EC5.1.3.13	dTDP-4-dehydrorhamnose 3,5-epimerase	0.325989	0.145494	0.03	0.09	-0.233836	0.0907551	0.01	0.05
Total phytosterol	Faecalibacterium prausnitzii	EC5.1.3.14	UDP-N-acetylglucosamine 2-epimerase (non-hydrolyzing)	0.492909	0.319903	0.12	0.2	0.0269056	0.194837	0.89	0.89
Total phytosterol	Faecalibacterium prausnitzii	EC5.1.3.2	UDP-glucose 4-epimerase	0.298489	0.132726	0.02	0.09	-0.188399	0.0828588	0.02	0.05
Total phytosterol	Faecalibacterium prausnitzii	EC5.1.3.3	Aldose 1-epimerase	0.319558	0.128444	0.01	0.08	-0.187582	0.08095	0.02	0.05
Total phytosterol	Faecalibacterium prausnitzii	EC5.1.3.32	L-rhamnose mutarotase	0.444628	0.252251	0.08	0.14	-0.0374687	0.152997	0.81	0.82
Total phytosterol	Faecalibacterium prausnitzii	EC5.1.3.9	N-acylglucosamine-6-phosphate 2-epimerase	0.271537	0.122194	0.03	0.09	-0.193577	0.0760941	0.01	0.05
Total phytosterol	Faecalibacterium prausnitzii	EC5.2.1.8	Peptidylprolyl isomerase	0.300005	0.13222	0.02	0.08	-0.20206	0.0825393	0.01	0.05
Total phytosterol	Faecalibacterium prausnitzii	EC5.3.1.1	Triose-phosphate isomerase	0.340009	0.128322	0.008	0.08	-0.245814	0.0805951	0.002	0.03
Total phytosterol	Faecalibacterium prausnitzii	EC5.3.1.12	Glucuronate isomerase	0.284903	0.14061	0.04	0.1	-0.246803	0.0877653	0.005	0.04
Total phytosterol	Faecalibacterium prausnitzii	EC5.3.1.14	L-rhamnose isomerase	0.286629	0.236089	0.22	0.34	0.00302741	0.143567	0.98	0.98
Total phytosterol	Faecalibacterium prausnitzii	EC5.3.1.16	isomerase	0.421596	0.160207	0.008	0.08	-0.238867	0.0993834	0.02	0.05
Total phytosterol	Faecalibacterium prausnitzii	EC5.3.1.17	5-dehydro-4-deoxy-D-glucuronate isomerase	0.301247	0.116376	0.01	0.08	-0.197037	0.0729785	0.007	0.04
Total phytosterol	Faecalibacterium prausnitzii	EC5.3.1.6	Ribose-5-phosphate isomerase	0.287962	0.117335	0.01	0.08	-0.226	0.0736378	0.002	0.03
Total phytosterol	Faecalibacterium prausnitzii	EC5.3.1.8	Mannose-6-phosphate isomerase	0.200006	0.296157	0.5	0.68	-0.324525	0.179126	0.07	0.09
Total phytosterol	Faecalibacterium prausnitzii	EC5.4.2.1	Transferred entry	0.343919	0.204824	0.09	0.16	-0.283965	0.126405	0.02	0.05
Total phytosterol	Faecalibacterium prausnitzii	EC5.4.2.10	Phosphoglucosamine mutase	0.369866	0.135726	0.006	0.08	-0.260927	0.0848959	0.002	0.03
Total phytosterol	Faecalibacterium prausnitzii	EC5.4.2.2	Phosphoglucomutase (alpha-D-glucose-1,6-bisphosphate-dependent)	0.357721	0.172715	0.04	0.1	-0.244989	0.10688	0.02	0.05
Total phytosterol	Faecalibacterium prausnitzii	EC5.4.2.7	Phosphopentomutase	0.300263	0.13035	0.02	0.08	-0.169718	0.0817145	0.04	0.06
Total phytosterol	Faecalibacterium prausnitzii	EC5.4.99.12	tRNA pseudouridine(38-40) synthase	0.29684	0.143498	0.04	0.1	-0.279099	0.0890193	0.002	0.03
Total phytosterol	Faecalibacterium prausnitzii	EC5.4.99.16	Maltose alpha-D-glucosyltransferase	0.531717	0.194953	0.006	0.08	-0.419509	0.120721	<0.001	0.02
Total phytosterol	Faecalibacterium prausnitzii	EC5.4.99.18	5-(carboxyamino)imidazole ribonucleotide mutase	0.318666	0.115046	0.006	0.08	-0.190589	0.0722277	0.008	0.05
Total phytosterol	Faecalibacterium prausnitzii	EC5.4.99.24	23S rRNA pseudouridine(955/2504/2580) synthase	0.257016	0.122454	0.04	0.09	-0.14686	0.0765471	0.06	0.08
Total phytosterol	Faecalibacterium prausnitzii	EC5.4.99.61	Precorrin-8X methylmutase	0.315434	0.135103	0.02	0.08	-0.150364	0.0850181	0.08	0.1
Total phytosterol	Faecalibacterium prausnitzii	EC5.4.99.9	UDP-galactopyranose mutase	0.257257	0.115233	0.03	0.09	-0.193592	0.0720186	0.007	0.04
Total phytosterol	Faecalibacterium prausnitzii	EC5.6.2.1	NO_NAME	0.327332	0.151363	0.03	0.09	-0.287713	0.0937456	0.002	0.03
Total phytosterol	Faecalibacterium prausnitzii	EC5.6.2.3	NO_NAME	0.269454	0.119599	0.02	0.09	-0.186212	0.0750155	0.01	0.05
Total phytosterol	Faecalibacterium prausnitzii	EC5.99.1.2	DNA topoisomerase	0.284416	0.131476	0.03	0.09	-0.185077	0.0820919	0.02	0.05
Total phytosterol	Faecalibacterium prausnitzii	EC6.1.1.10	Methionine--tRNA ligase	0.399312	0.13811	0.004	0.08	-0.29285	0.0870919	<0.001	0.02
Total phytosterol	Faecalibacterium prausnitzii	EC6.1.1.11	Serine--tRNA ligase	0.281764	0.125679	0.02	0.09	-0.211581	0.0785867	0.007	0.04
Total phytosterol	Faecalibacterium prausnitzii	EC6.1.1.12	Aspartate--tRNA ligase	0.315649	0.123927	0.01	0.08	-0.250784	0.0770717	0.001	0.02
Total phytosterol	Faecalibacterium prausnitzii	EC6.1.1.14	Glycine--tRNA ligase	0.26587	0.134382	0.05	0.1	-0.201217	0.0840774	0.02	0.05
Total phytosterol	Faecalibacterium prausnitzii	EC6.1.1.15	Proline--tRNA ligase	0.282425	0.144836	0.05	0.11	-0.273019	0.0908165	0.003	0.04
Total phytosterol	Faecalibacterium prausnitzii	EC6.1.1.18	Glutamine--tRNA ligase	0.35431	0.129439	0.006	0.08	-0.249598	0.0815727	0.002	0.03
Total phytosterol	Faecalibacterium prausnitzii	EC6.1.1.22	Asparagine--tRNA ligase	0.31386	0.133503	0.02	0.08	-0.204808	0.0835243	0.01	0.05
Total phytosterol	Faecalibacterium prausnitzii	EC6.1.1.3	Threonine--tRNA ligase	0.32848	0.151875	0.03	0.09	-0.232274	0.0943796	0.01	0.05
Total phytosterol	Faecalibacterium prausnitzii	EC6.1.1.6	Lysine--tRNA ligase	0.266586	0.122092	0.03	0.09	-0.157266	0.0764242	0.04	0.06
Total phytosterol	Faecalibacterium prausnitzii	EC6.1.1.7	Alanine--tRNA ligase	0.296076	0.128589	0.02	0.08	-0.219526	0.0798103	0.006	0.04
Total phytosterol	Faecalibacterium prausnitzii	EC6.2.1.12	4-coumarate--CoA ligase	0.426567	0.194737	0.03	0.09	-0.327663	0.118599	0.006	0.04
Total phytosterol	Faecalibacterium prausnitzii	EC6.2.1.22	[Citrate (pro-3S)-lyase] ligase	0.35295	0.228088	0.12	0.2	-0.521784	0.140025	<0.001	0.009
Total phytosterol	Faecalibacterium prausnitzii	EC6.2.1.3	Long-chain-fatty-acid--CoA ligase	0.416154	0.135168	0.002	0.08	-0.265067	0.0844002	0.002	0.03
Total phytosterol	Faecalibacterium prausnitzii	EC6.3.1.1	Aspartate--ammonia ligase	0.312612	0.119896	0.009	0.08	-0.200308	0.0748684	0.007	0.04
Total phytosterol	Faecalibacterium prausnitzii	EC6.3.1.2	Glutamate--ammonia ligase	0.309111	0.138342	0.03	0.09	-0.153307	0.0859739	0.07	0.09
Total phytosterol	Faecalibacterium prausnitzii	EC6.3.2.10	UDP-N-acetylmuramoyl-tripeptide--D-alanyl-D-alanine ligase	0.309011	0.122605	0.01	0.08	-0.190974	0.0766327	0.01	0.05
Total phytosterol	Faecalibacterium prausnitzii	EC6.3.2.13	UDP-N-acetylmuramoyl-L-alanyl-D-glutamate--2,6-diaminopimelate ligase	0.28182	0.125426	0.02	0.09	-0.227781	0.078357	0.004	0.04
Total phytosterol	Faecalibacterium prausnitzii	EC6.3.2.17	Tetrahydrofolate synthase	0.339047	0.129692	0.009	0.08	-0.197343	0.0805484	0.01	0.05
Total phytosterol	Faecalibacterium prausnitzii	EC6.3.2.8	UDP-N-acetylmuramate--L-alanine ligase	0.27408	0.126524	0.03	0.09	-0.220602	0.0785656	0.005	0.04
Total phytosterol	Faecalibacterium prausnitzii	EC6.3.2.9	UDP-N-acetylmuramoyl-L-alanine--D-glutamate ligase	0.294983	0.126109	0.02	0.08	-0.205383	0.078835	0.009	0.05
Total phytosterol	Faecalibacterium prausnitzii	EC6.3.3.1	Phosphoribosylformylglycinamidine cyclo-ligase	0.260754	0.136074	0.06	0.11	-0.20382	0.0843708	0.02	0.05
Total phytosterol	Faecalibacterium prausnitzii	EC6.3.3.2	5-formyltetrahydrofolate cyclo-ligase	0.361067	0.128531	0.005	0.08	-0.204434	0.080641	0.01	0.05
Total phytosterol	Faecalibacterium prausnitzii	EC6.3.4.13	Phosphoribosylamine--glycine ligase	0.34536	0.130488	0.008	0.08	-0.211144	0.0815705	0.01	0.05
Total phytosterol	Faecalibacterium prausnitzii	EC6.3.4.15	Biotin--[acetyl-CoA-carboxylase] ligase	0.314026	0.119588	0.009	0.08	-0.181548	0.0751366	0.02	0.05
Total phytosterol	Faecalibacterium prausnitzii	EC6.3.4.19	tRNA(Ile)-lysidine synthetase	0.368847	0.167712	0.03	0.09	-0.168692	0.104033	0.1	0.12
Total phytosterol	Faecalibacterium prausnitzii	EC6.3.4.21	Nicotinate phosphoribosyltransferase	0.304674	0.132041	0.02	0.08	-0.169607	0.0827182	0.04	0.07
Total phytosterol	Faecalibacterium prausnitzii	EC6.3.4.3	Formate--tetrahydrofolate ligase	0.298824	0.131095	0.02	0.08	-0.212329	0.081996	0.01	0.05
Total phytosterol	Faecalibacterium prausnitzii	EC6.3.4.4	Adenylosuccinate synthase	0.255126	0.118072	0.03	0.09	-0.169854	0.0745855	0.02	0.05
Total phytosterol	Faecalibacterium prausnitzii	EC6.3.4.5	Argininosuccinate synthase	0.275739	0.137705	0.05	0.1	-0.193865	0.0859554	0.02	0.05
Total phytosterol	Faecalibacterium prausnitzii	EC6.3.5.1	NAD(+) synthase (glutamine-hydrolyzing)	0.329101	0.161216	0.04	0.1	-0.214568	0.0996014	0.03	0.06
Total phytosterol	Faecalibacterium prausnitzii	EC6.3.5.11	Cobyrinate a,c-diamide synthase (glutamine-hydrolyzing)	0.239494	0.205045	0.24	0.37	-0.365374	0.126731	0.004	0.04
Total phytosterol	Faecalibacterium prausnitzii	EC6.3.5.2	GMP synthase (glutamine-hydrolyzing)	0.250766	0.128881	0.05	0.11	-0.228166	0.0801287	0.004	0.04
Total phytosterol	Faecalibacterium prausnitzii	EC6.3.5.3	Phosphoribosylformylglycinamidine synthase	0.323965	0.124633	0.009	0.08	-0.188848	0.0781692	0.02	0.05
Total phytosterol	Faecalibacterium prausnitzii	EC6.3.5.4	Asparagine synthase (glutamine-hydrolyzing)	0.312306	0.125255	0.01	0.08	-0.232493	0.0778858	0.003	0.04
Total phytosterol	Faecalibacterium prausnitzii	EC6.3.5.5	Carbamoyl-phosphate synthase (glutamine-hydrolyzing)	0.267039	0.13174	0.04	0.1	-0.2232	0.0822076	0.007	0.04
Total phytosterol	Faecalibacterium prausnitzii	EC6.3.5.9	Hydrogenobyrinic acid a,c-diamide synthase (glutamine-hydrolyzing)	0.28773	0.170621	0.09	0.16	0.0633572	0.104052	0.54	0.55
Total phytosterol	Faecalibacterium prausnitzii	EC6.4.1.1	Pyruvate carboxylase	0.314383	0.130312	0.02	0.08	-0.234943	0.0820024	0.004	0.04
Total phytosterol	Faecalibacterium prausnitzii	EC6.4.1.2	Acetyl-CoA carboxylase	0.367506	0.140372	0.009	0.08	-0.215475	0.0875841	0.01	0.05
Total phytosterol	Faecalibacterium prausnitzii	EC7.1.2.1	NO_NAME	0.260513	0.201406	0.2	0.3	-0.443041	0.122815	<0.001	0.01
Total phytosterol	Faecalibacterium prausnitzii	EC7.1.2.2	NO_NAME	0.367164	0.161378	0.02	0.08	-0.257789	0.100225	0.01	0.05
Total phytosterol	Faecalibacterium prausnitzii	EC7.2.2.14	NO_NAME	-0.0442367	0.362869	0.9	0.95	-0.260608	0.219289	0.23	0.25
Total phytosterol	Faecalibacterium prausnitzii	EC7.2.2.6	NO_NAME	0.634051	0.324111	0.05	0.11	-0.172065	0.197925	0.38	0.39
Total phytosterol	Faecalibacterium prausnitzii	EC7.2.2.8	NO_NAME	0.496983	0.188531	0.008	0.08	-0.274376	0.117224	0.02	0.05
Total phytosterol	Faecalibacterium prausnitzii	EC7.2.4.2	NO_NAME	0.351396	0.162304	0.03	0.09	-0.212335	0.100859	0.04	0.06
Total phytosterol	Faecalibacterium prausnitzii	EC7.2.4.5	NO_NAME	0.329987	0.131076	0.01	0.08	-0.205019	0.0822858	0.01	0.05
Total phytosterol	Faecalibacterium prausnitzii	EC7.4.2.10	NO_NAME	0.504339	0.317527	0.11	0.19	-0.0364536	0.19172	0.85	0.85
Total phytosterol	Faecalibacterium prausnitzii	EC7.4.2.11	NO_NAME	0.295018	0.123099	0.02	0.08	-0.209531	0.0767245	0.006	0.04
Total phytosterol	Faecalibacterium prausnitzii	EC7.5.2.3	NO_NAME	0.271586	0.208495	0.19	0.3	-0.444186	0.126714	<0.001	0.02
Total phytosterol	Faecalibacterium prausnitzii	EC7.5.2.6	NO_NAME	0.698684	0.263952	0.008	0.08	-0.464427	0.16228	0.004	0.04
Total phytosterol	Faecalibacterium prausnitzii	EC7.6.2.11	NO_NAME	0.347566	0.144742	0.02	0.08	-0.247842	0.0901115	0.006	0.04
Total phytosterol	Faecalibacterium prausnitzii	EC7.6.2.15	NO_NAME	0.298627	0.192551	0.12	0.2	-0.353457	0.119541	0.003	0.04
Total phytosterol	Faecalibacterium prausnitzii	EC7.6.2.2	NO_NAME	0.321002	0.286119	0.26	0.39	-0.426477	0.174147	0.01	0.05
Total phytosterol	Ruminococcus bicirculans	EC1.18.6.1	Nitrogenase	0.464656	0.276541	0.09	0.16	-0.411525	0.16751	0.01	0.05
Total phytosterol	Ruminococcus bicirculans	EC2.1.1.72	Site-specific DNA-methyltransferase (adenine-specific)	0.60611	0.385828	0.12	0.19	-0.563599	0.233655	0.02	0.05
Total phytosterol	Ruminococcus bicirculans	EC2.6.1.16	Glutamine--fructose-6-phosphate transaminase (isomerizing)	0.599741	0.319317	0.06	0.12	-0.527296	0.192369	0.006	0.04
Total phytosterol	Ruminococcus bicirculans	EC2.7.13.3	Histidine kinase	0.397114	0.244164	0.1	0.18	-0.368322	0.147754	0.01	0.05
Total phytosterol	Ruminococcus bicirculans	EC2.7.7.6	DNA-directed RNA polymerase	0.501423	0.309296	0.1	0.18	-0.43333	0.186902	0.02	0.05
Total phytosterol	Ruminococcus bicirculans	EC2.7.7.7	DNA-directed DNA polymerase	0.491482	0.302064	0.1	0.18	-0.445131	0.182702	0.01	0.05
Total phytosterol	Ruminococcus bicirculans	EC3.2.1.23	Beta-galactosidase	0.423521	0.321927	0.19	0.29	-0.439778	0.195519	0.02	0.05
Total phytosterol	Ruminococcus bicirculans	EC3.2.1.4	Cellulase	0.527733	0.31611	0.1	0.16	-0.468558	0.190941	0.01	0.05
Total phytosterol	Ruminococcus bicirculans	EC3.4.13.21	Dipeptidase E	0.352717	0.185689	0.06	0.11	-0.315728	0.112701	0.005	0.04
Total phytosterol	Ruminococcus bicirculans	EC3.4.16.4	Serine-type D-Ala-D-Ala carboxypeptidase	0.461235	0.291636	0.11	0.19	-0.409425	0.176183	0.02	0.05
Total phytosterol	Ruminococcus bicirculans	EC3.5.3.11	Agmatinase	0.351998	0.307885	0.25	0.38	-0.378253	0.186973	0.04	0.07
Total phytosterol	Ruminococcus bicirculans	EC3.6.3.14	H(+)-transporting two-sector ATPase	0.488092	0.321777	0.13	0.21	-0.490064	0.194714	0.01	0.05
Total phytosterol	Ruminococcus bicirculans	EC3.6.3.28	Phosphonate-transporting ATPase	0.488188	0.297175	0.1	0.17	-0.4501	0.179353	0.01	0.05
Total phytosterol	Ruminococcus bicirculans	EC3.6.4.12	DNA helicase	0.486829	0.327108	0.14	0.22	-0.48019	0.197893	0.02	0.05
Total phytosterol	Ruminococcus bicirculans	EC4.1.1.49	Phosphoenolpyruvate carboxykinase (ATP)	0.553616	0.334753	0.1	0.17	-0.490617	0.202283	0.02	0.05
Total phytosterol	Ruminococcus bicirculans	EC5.2.1.8	Peptidylprolyl isomerase	0.425782	0.271553	0.12	0.19	-0.376285	0.164447	0.02	0.05
Total phytosterol	Ruminococcus bicirculans	EC6.4.1.2	Acetyl-CoA carboxylase	0.452712	0.265706	0.09	0.16	-0.395148	0.16093	0.01	0.05
Total phytosterol	Ruminococcus bicirculans	EC7.1.2.2	NO_NAME	0.469263	0.293336	0.11	0.18	-0.444561	0.177477	0.01	0.05
β-Sitosterol	Anaerostipes hadrus	EC1.1.1.1	Alcohol dehydrogenase	0.238806	0.197602	0.23	0.32	-0.225601	0.118098	0.06	0.08
β-Sitosterol	Anaerostipes hadrus	EC1.1.1.100	3-oxoacyl-[acyl-carrier-protein] reductase	0.24913	0.205192	0.22	0.32	-0.262031	0.122659	0.03	0.06
β-Sitosterol	Anaerostipes hadrus	EC1.1.1.103	L-threonine 3-dehydrogenase	0.134173	0.236738	0.57	0.61	-0.282352	0.140285	0.04	0.07
β-Sitosterol	Anaerostipes hadrus	EC1.1.1.133	dTDP-4-dehydrorhamnose reductase	0.0941532	0.154172	0.54	0.59	-0.221834	0.0915612	0.02	0.05
β-Sitosterol	Anaerostipes hadrus	EC1.1.1.14	L-iditol 2-dehydrogenase	0.267202	0.194011	0.17	0.25	-0.243933	0.114635	0.03	0.06
β-Sitosterol	Anaerostipes hadrus	EC1.1.1.157	3-hydroxybutyryl-CoA dehydrogenase	-0.0104877	0.150369	0.94	0.95	-0.146734	0.0900307	0.1	0.12
β-Sitosterol	Anaerostipes hadrus	EC1.1.1.169	2-dehydropantoate 2-reductase	0.210363	0.188874	0.27	0.36	-0.1845	0.112863	0.1	0.12
β-Sitosterol	Anaerostipes hadrus	EC1.1.1.17	Mannitol-1-phosphate 5-dehydrogenase	0.385062	0.232992	0.1	0.16	-0.266062	0.140075	0.06	0.08
β-Sitosterol	Anaerostipes hadrus	EC1.1.1.18	Inositol 2-dehydrogenase	0.164454	0.236498	0.49	0.54	-0.312073	0.139913	0.03	0.05
β-Sitosterol	Anaerostipes hadrus	EC1.1.1.193	5-amino-6-(5-phosphoribosylamino)uracil reductase	0.119792	0.159374	0.45	0.51	-0.129001	0.0943865	0.17	0.18
β-Sitosterol	Anaerostipes hadrus	EC1.1.1.2	Alcohol dehydrogenase (NADP(+))	0.174266	0.162872	0.28	0.37	-0.242439	0.0968716	0.01	0.05
β-Sitosterol	Anaerostipes hadrus	EC1.1.1.202	1,3-propanediol dehydrogenase	0.127083	0.143005	0.37	0.46	-0.159537	0.0851505	0.06	0.08
β-Sitosterol	Anaerostipes hadrus	EC1.1.1.205	IMP dehydrogenase	0.108611	0.151278	0.47	0.53	-0.226477	0.0900415	0.01	0.05
β-Sitosterol	Anaerostipes hadrus	EC1.1.1.23	Histidinol dehydrogenase	0.120084	0.165668	0.47	0.53	-0.150948	0.0987103	0.13	0.14
β-Sitosterol	Anaerostipes hadrus	EC1.1.1.25	Shikimate dehydrogenase	0.204816	0.183449	0.26	0.36	-0.154242	0.109674	0.16	0.17
β-Sitosterol	Anaerostipes hadrus	EC1.1.1.261	sn-glycerol-1-phosphate dehydrogenase	0.150863	0.192252	0.43	0.5	-0.193609	0.115353	0.09	0.11
β-Sitosterol	Anaerostipes hadrus	EC1.1.1.267	1-deoxy-D-xylulose-5-phosphate reductoisomerase	0.143227	0.162738	0.38	0.46	-0.166629	0.097049	0.09	0.1
β-Sitosterol	Anaerostipes hadrus	EC1.1.1.27	L-lactate dehydrogenase	0.166696	0.224579	0.46	0.52	-0.256844	0.131829	0.05	0.07
β-Sitosterol	Anaerostipes hadrus	EC1.1.1.29	Glycerate dehydrogenase	0.0886187	0.199894	0.66	0.69	-0.164657	0.118554	0.16	0.18
β-Sitosterol	Anaerostipes hadrus	EC1.1.1.292	1,5-anhydro-D-fructose reductase (1,5-anhydro-D-mannitol-forming)	0.192369	0.22739	0.4	0.47	-0.269978	0.133424	0.04	0.07
β-Sitosterol	Anaerostipes hadrus	EC1.1.1.3	Homoserine dehydrogenase	0.112171	0.162708	0.49	0.54	-0.219639	0.0967291	0.02	0.05
β-Sitosterol	Anaerostipes hadrus	EC1.1.1.35	3-hydroxyacyl-CoA dehydrogenase	-0.0104877	0.150369	0.94	0.95	-0.146734	0.0900307	0.1	0.12
β-Sitosterol	Anaerostipes hadrus	EC1.1.1.38	Malate dehydrogenase (oxaloacetate-decarboxylating)	0.145798	0.158764	0.36	0.44	-0.178296	0.0948441	0.06	0.08
β-Sitosterol	Anaerostipes hadrus	EC1.1.1.40	Malate dehydrogenase (oxaloacetate-decarboxylating) (NADP(+))	0.145798	0.158764	0.36	0.44	-0.178296	0.0948441	0.06	0.08
β-Sitosterol	Anaerostipes hadrus	EC1.1.1.42	Isocitrate dehydrogenase (NADP(+))	0.222338	0.175886	0.21	0.29	-0.150017	0.105583	0.16	0.17
β-Sitosterol	Anaerostipes hadrus	EC1.1.1.6	Glycerol dehydrogenase	0.300921	0.19759	0.13	0.2	-0.232199	0.117161	0.05	0.07
β-Sitosterol	Anaerostipes hadrus	EC1.1.1.77	Lactaldehyde reductase	0.234906	0.210668	0.26	0.36	-0.198898	0.126626	0.12	0.13
β-Sitosterol	Anaerostipes hadrus	EC1.1.1.85	3-isopropylmalate dehydrogenase	0.0704143	0.184514	0.7	0.73	-0.223637	0.109438	0.04	0.07
β-Sitosterol	Anaerostipes hadrus	EC1.1.1.86	Ketol-acid reductoisomerase (NADP(+))	0.0988771	0.154442	0.52	0.57	-0.169268	0.0926257	0.07	0.09
β-Sitosterol	Anaerostipes hadrus	EC1.1.1.94	Glycerol-3-phosphate dehydrogenase (NAD(P)(+))	0.323861	0.223784	0.15	0.23	-0.31234	0.13272	0.02	0.05
β-Sitosterol	Anaerostipes hadrus	EC1.1.1.95	Phosphoglycerate dehydrogenase	0.129268	0.176076	0.46	0.52	-0.182774	0.105133	0.08	0.1
β-Sitosterol	Anaerostipes hadrus	EC1.11.1.1	NADH peroxidase	0.363985	0.214135	0.09	0.15	-0.318838	0.128258	0.01	0.05
β-Sitosterol	Anaerostipes hadrus	EC1.12.7.2	Ferredoxin hydrogenase	0.189628	0.191151	0.32	0.41	-0.234505	0.113272	0.04	0.06
β-Sitosterol	Anaerostipes hadrus	EC1.17.1.4	Xanthine dehydrogenase	0.178707	0.161908	0.27	0.36	-0.185193	0.0971662	0.06	0.08
β-Sitosterol	Anaerostipes hadrus	EC1.17.1.8	4-hydroxy-tetrahydrodipicolinate reductase	0.0795664	0.171534	0.64	0.68	-0.129057	0.101917	0.21	0.22
β-Sitosterol	Anaerostipes hadrus	EC1.17.4.2	Ribonucleoside-triphosphate reductase	0.264887	0.206165	0.2	0.29	-0.252453	0.123362	0.04	0.07
β-Sitosterol	Anaerostipes hadrus	EC1.18.1.2	Ferredoxin--NADP(+) reductase	0.0918849	0.161294	0.57	0.61	-0.174892	0.0959012	0.07	0.09
β-Sitosterol	Anaerostipes hadrus	EC1.2.1.11	Aspartate-semialdehyde dehydrogenase	0.122585	0.163279	0.45	0.51	-0.121441	0.0973854	0.21	0.22
β-Sitosterol	Anaerostipes hadrus	EC1.2.1.38	N-acetyl-gamma-glutamyl-phosphate reductase	0.0193074	0.167915	0.91	0.92	-0.273988	0.100291	0.006	0.04
β-Sitosterol	Anaerostipes hadrus	EC1.2.1.41	Glutamate-5-semialdehyde dehydrogenase	0.0474284	0.148859	0.75	0.77	-0.120563	0.0888442	0.17	0.19
β-Sitosterol	Anaerostipes hadrus	EC1.2.7.1	Pyruvate synthase	0.240847	0.210923	0.25	0.35	-0.261933	0.12546	0.04	0.06
β-Sitosterol	Anaerostipes hadrus	EC1.3.1.108	NO_NAME	0.271403	0.243133	0.26	0.36	-0.320876	0.144518	0.03	0.05
β-Sitosterol	Anaerostipes hadrus	EC1.3.1.14	Dihydroorotate dehydrogenase (NAD(+))	0.195624	0.209556	0.35	0.44	-0.267499	0.123237	0.03	0.06
β-Sitosterol	Anaerostipes hadrus	EC1.3.1.43	Arogenate dehydrogenase	0.152248	0.167454	0.36	0.45	-0.224043	0.099687	0.02	0.05
β-Sitosterol	Anaerostipes hadrus	EC1.3.1.44	Trans-2-enoyl-CoA reductase (NAD(+))	0.15455	0.161898	0.34	0.43	-0.181516	0.0965005	0.06	0.08
β-Sitosterol	Anaerostipes hadrus	EC1.3.1.95	Acryloyl-CoA reductase (NADH)	0.0531055	0.15228	0.73	0.75	-0.187235	0.0908265	0.04	0.06
β-Sitosterol	Anaerostipes hadrus	EC1.3.7.8	Benzoyl-CoA reductase	0.222659	0.183645	0.23	0.32	-0.219062	0.109066	0.04	0.07
β-Sitosterol	Anaerostipes hadrus	EC1.3.7.9	4-hydroxybenzoyl-CoA reductase	0.269058	0.188333	0.15	0.24	-0.221571	0.11294	0.05	0.07
β-Sitosterol	Anaerostipes hadrus	EC1.3.8.1	Short-chain acyl-CoA dehydrogenase	0.234465	0.211244	0.27	0.36	-0.308196	0.125735	0.01	0.05
β-Sitosterol	Anaerostipes hadrus	EC1.3.99.1	Deleted entry	0.273594	0.163751	0.09	0.16	-0.230195	0.0981792	0.02	0.05
β-Sitosterol	Anaerostipes hadrus	EC1.3.99.2	Transferred entry	0.223399	0.205196	0.28	0.37	-0.290556	0.122584	0.02	0.05
β-Sitosterol	Anaerostipes hadrus	EC1.4.1.13	Glutamate synthase (NADPH)	0.180458	0.192505	0.35	0.43	-0.214385	0.114675	0.06	0.08
β-Sitosterol	Anaerostipes hadrus	EC1.4.1.14	Glutamate synthase (NADH)	0.0944221	0.172713	0.58	0.62	-0.180638	0.102642	0.08	0.1
β-Sitosterol	Anaerostipes hadrus	EC1.4.1.16	Diaminopimelate dehydrogenase	0.0261307	0.142274	0.85	0.87	-0.0686602	0.0854974	0.42	0.43
β-Sitosterol	Anaerostipes hadrus	EC1.4.1.4	Glutamate dehydrogenase (NADP(+))	0.242342	0.192631	0.21	0.3	-0.278683	0.115484	0.02	0.05
β-Sitosterol	Anaerostipes hadrus	EC1.4.3.16	L-aspartate oxidase	0.307815	0.225046	0.17	0.26	-0.286165	0.133674	0.03	0.06
β-Sitosterol	Anaerostipes hadrus	EC1.4.7.1	Glutamate synthase (ferredoxin)	0.179896	0.170293	0.29	0.38	-0.19527	0.101382	0.05	0.08
β-Sitosterol	Anaerostipes hadrus	EC1.5.1.2	Pyrroline-5-carboxylate reductase	0.0586579	0.155631	0.71	0.74	-0.120337	0.0929429	0.2	0.21
β-Sitosterol	Anaerostipes hadrus	EC1.5.1.20	Methylenetetrahydrofolate reductase (NAD(P)H)	0.0748004	0.165535	0.65	0.69	-0.188145	0.0990658	0.06	0.08
β-Sitosterol	Anaerostipes hadrus	EC1.7.99.1	Hydroxylamine reductase	0.239045	0.207131	0.25	0.34	-0.24878	0.123919	0.04	0.07
β-Sitosterol	Anaerostipes hadrus	EC1.8.1.19	Sulfide dehydrogenase	0.177177	0.181293	0.33	0.42	-0.197547	0.107745	0.07	0.09
β-Sitosterol	Anaerostipes hadrus	EC1.8.1.9	Thioredoxin-disulfide reductase	0.111373	0.15296	0.47	0.52	-0.157601	0.0908027	0.08	0.1
β-Sitosterol	Anaerostipes hadrus	EC1.8.7.1	Assimilatory sulfite reductase (ferredoxin)	-0.0328323	0.136801	0.81	0.83	-0.146944	0.0814055	0.07	0.09
β-Sitosterol	Anaerostipes hadrus	EC1.97.1.4	[Formate-C-acetyltransferase]-activating enzyme	0.132862	0.172117	0.44	0.51	-0.166456	0.103355	0.11	0.12
β-Sitosterol	Anaerostipes hadrus	EC2.1.1.10	Homocysteine S-methyltransferase	-0.0382183	0.178462	0.83	0.85	-0.258807	0.105447	0.01	0.05
β-Sitosterol	Anaerostipes hadrus	EC2.1.1.13	Methionine synthase	0.00347039	0.148493	0.98	0.98	-0.233245	0.0881113	0.008	0.05
β-Sitosterol	Anaerostipes hadrus	EC2.1.1.14	5-methyltetrahydropteroyltriglutamate--homocysteine S-methyltransferase	0.332521	0.233701	0.15	0.24	-0.226088	0.13814	0.1	0.12
β-Sitosterol	Anaerostipes hadrus	EC2.1.1.148	Thymidylate synthase (FAD)	0.293785	0.212209	0.17	0.25	0.0470423	0.12797	0.71	0.72
β-Sitosterol	Anaerostipes hadrus	EC2.1.1.170	16S rRNA (guanine(527)-N(7))-methyltransferase	0.185692	0.161299	0.25	0.34	-0.19449	0.0959477	0.04	0.07
β-Sitosterol	Anaerostipes hadrus	EC2.1.1.171	16S rRNA (guanine(966)-N(2))-methyltransferase	0.143644	0.158207	0.36	0.45	-0.16881	0.0948452	0.08	0.09
β-Sitosterol	Anaerostipes hadrus	EC2.1.1.173	23S rRNA (guanine(2445)-N(2))-methyltransferase	0.202185	0.195415	0.3	0.39	-0.207857	0.116596	0.07	0.09
β-Sitosterol	Anaerostipes hadrus	EC2.1.1.178	16S rRNA (cytosine(1407)-C(5))-methyltransferase	-0.00598581	0.145011	0.97	0.97	-0.142273	0.0864076	0.1	0.12
β-Sitosterol	Anaerostipes hadrus	EC2.1.1.189	23S rRNA (uracil(747)-C(5))-methyltransferase	0.219083	0.185887	0.24	0.33	-0.226154	0.110668	0.04	0.07
β-Sitosterol	Anaerostipes hadrus	EC2.1.1.197	Malonyl-[acyl-carrier protein] O-methyltransferase	0.089443	0.157533	0.57	0.61	-0.190372	0.0944145	0.04	0.07
β-Sitosterol	Anaerostipes hadrus	EC2.1.1.198	16S rRNA (cytidine(1402)-2'-O)-methyltransferase	0.227147	0.176585	0.2	0.29	-0.135098	0.104978	0.2	0.21
β-Sitosterol	Anaerostipes hadrus	EC2.1.1.199	16S rRNA (cytosine(1402)-N(4))-methyltransferase	0.141982	0.167545	0.4	0.47	-0.156963	0.0997876	0.12	0.13
β-Sitosterol	Anaerostipes hadrus	EC2.1.1.223	tRNA(1)(Val) (adenine(37)-N(6))-methyltransferase	0.126128	0.157492	0.42	0.49	-0.197397	0.0940575	0.04	0.06
β-Sitosterol	Anaerostipes hadrus	EC2.1.1.297	Peptide chain release factor N(5)-glutamine methyltransferase	0.124572	0.163659	0.45	0.51	-0.201406	0.0979854	0.04	0.06
β-Sitosterol	Anaerostipes hadrus	EC2.1.1.33	tRNA (guanine(46)-N(7))-methyltransferase	0.148656	0.174219	0.39	0.47	-0.208902	0.102819	0.04	0.07
β-Sitosterol	Anaerostipes hadrus	EC2.1.1.37	DNA (cytosine-5-)-methyltransferase	0.30059	0.227699	0.19	0.27	-0.214021	0.136499	0.12	0.13
β-Sitosterol	Anaerostipes hadrus	EC2.1.1.45	Thymidylate synthase	0.125649	0.172199	0.47	0.52	-0.158016	0.101689	0.12	0.14
β-Sitosterol	Anaerostipes hadrus	EC2.1.1.63	Methylated-DNA--[protein]-cysteine S-methyltransferase	0.1197	0.180655	0.51	0.56	-0.204806	0.107683	0.06	0.08
β-Sitosterol	Anaerostipes hadrus	EC2.1.1.72	Site-specific DNA-methyltransferase (adenine-specific)	0.26166	0.297232	0.38	0.46	-0.405639	0.176202	0.02	0.05
β-Sitosterol	Anaerostipes hadrus	EC2.1.2.3	Phosphoribosylaminoimidazolecarboxamide formyltransferase	0.131341	0.160229	0.41	0.48	-0.15137	0.0966217	0.12	0.13
β-Sitosterol	Anaerostipes hadrus	EC2.1.3.2	Aspartate carbamoyltransferase	0.129371	0.164985	0.43	0.5	-0.183705	0.0975233	0.06	0.08
β-Sitosterol	Anaerostipes hadrus	EC2.1.3.3	Ornithine carbamoyltransferase	0.182179	0.16406	0.27	0.36	-0.250394	0.0975523	0.01	0.05
β-Sitosterol	Anaerostipes hadrus	EC2.2.1.1	Transketolase	0.179698	0.18792	0.34	0.43	-0.245631	0.111676	0.03	0.06
β-Sitosterol	Anaerostipes hadrus	EC2.2.1.2	Transaldolase	0.176501	0.177903	0.32	0.41	-0.24636	0.105837	0.02	0.05
β-Sitosterol	Anaerostipes hadrus	EC2.2.1.6	Acetolactate synthase	0.165462	0.200289	0.41	0.48	-0.251968	0.11916	0.03	0.06
β-Sitosterol	Anaerostipes hadrus	EC2.2.1.7	1-deoxy-D-xylulose-5-phosphate synthase	0.227408	0.192729	0.24	0.33	-0.25358	0.11476	0.03	0.06
β-Sitosterol	Anaerostipes hadrus	EC2.3.1.16	Acetyl-CoA C-acyltransferase	0.165544	0.162455	0.31	0.4	-0.20702	0.0967262	0.03	0.06
β-Sitosterol	Anaerostipes hadrus	EC2.3.1.179	Beta-ketoacyl-[acyl-carrier-protein] synthase II	0.165544	0.162455	0.31	0.4	-0.20702	0.0967262	0.03	0.06
β-Sitosterol	Anaerostipes hadrus	EC2.3.1.180	Beta-ketoacyl-[acyl-carrier-protein] synthase III	0.148408	0.163573	0.36	0.45	-0.203016	0.0972844	0.04	0.06
β-Sitosterol	Anaerostipes hadrus	EC2.3.1.183	Phosphinothricin acetyltransferase	-0.0541693	0.186856	0.77	0.79	-0.207277	0.111301	0.06	0.08
β-Sitosterol	Anaerostipes hadrus	EC2.3.1.28	Chloramphenicol O-acetyltransferase	0.184363	0.168211	0.27	0.36	-0.181678	0.100308	0.07	0.09
β-Sitosterol	Anaerostipes hadrus	EC2.3.1.30	Serine O-acetyltransferase	0.00147997	0.173683	0.99	0.99	-0.154734	0.103696	0.14	0.15
β-Sitosterol	Anaerostipes hadrus	EC2.3.1.31	Homoserine O-acetyltransferase	0.200306	0.172412	0.25	0.34	-0.168192	0.10269	0.1	0.12
β-Sitosterol	Anaerostipes hadrus	EC2.3.1.39	[Acyl-carrier-protein] S-malonyltransferase	0.22812	0.174849	0.19	0.28	-0.189384	0.104481	0.07	0.09
β-Sitosterol	Anaerostipes hadrus	EC2.3.1.51	1-acylglycerol-3-phosphate O-acyltransferase	0.0888762	0.156713	0.57	0.61	-0.177118	0.0938489	0.06	0.08
β-Sitosterol	Anaerostipes hadrus	EC2.3.1.54	Formate C-acetyltransferase	0.160602	0.228007	0.48	0.54	-0.254867	0.134204	0.06	0.08
β-Sitosterol	Anaerostipes hadrus	EC2.3.1.8	Phosphate acetyltransferase	0.226075	0.16678	0.18	0.26	-0.136687	0.0999569	0.17	0.18
β-Sitosterol	Anaerostipes hadrus	EC2.3.1.9	Acetyl-CoA C-acetyltransferase	0.145263	0.165179	0.38	0.46	-0.208305	0.0979517	0.03	0.06
β-Sitosterol	Anaerostipes hadrus	EC2.3.2.3	Lysyltransferase	0.0672572	0.148151	0.65	0.68	-0.176262	0.0881945	0.05	0.07
β-Sitosterol	Anaerostipes hadrus	EC2.3.3.13	2-isopropylmalate synthase	0.0945243	0.175552	0.59	0.63	-0.185093	0.1051	0.08	0.1
β-Sitosterol	Anaerostipes hadrus	EC2.4.1.1	Glycogen phosphorylase	0.23628	0.194875	0.23	0.32	-0.201391	0.116498	0.08	0.1
β-Sitosterol	Anaerostipes hadrus	EC2.4.1.129	Peptidoglycan glycosyltransferase	0.384557	0.245323	0.12	0.19	-0.272481	0.146624	0.06	0.08
β-Sitosterol	Anaerostipes hadrus	EC2.4.1.18	1,4-alpha-glucan branching enzyme	0.213395	0.189441	0.26	0.35	-0.237473	0.112563	0.03	0.06
β-Sitosterol	Anaerostipes hadrus	EC2.4.1.21	Starch synthase	0.396552	0.239274	0.1	0.16	-0.275879	0.142514	0.05	0.08
β-Sitosterol	Anaerostipes hadrus	EC2.4.1.25	4-alpha-glucanotransferase	0.139611	0.161839	0.39	0.47	-0.198293	0.096475	0.04	0.06
β-Sitosterol	Anaerostipes hadrus	EC2.4.2.1	Purine-nucleoside phosphorylase	0.232106	0.216903	0.28	0.37	-0.212083	0.12877	0.1	0.12
β-Sitosterol	Anaerostipes hadrus	EC2.4.2.10	Orotate phosphoribosyltransferase	0.218775	0.203773	0.28	0.37	-0.173425	0.121635	0.15	0.17
β-Sitosterol	Anaerostipes hadrus	EC2.4.2.14	Amidophosphoribosyltransferase	0.187408	0.162943	0.25	0.34	-0.180721	0.0975204	0.06	0.08
β-Sitosterol	Anaerostipes hadrus	EC2.4.2.18	Anthranilate phosphoribosyltransferase	0.165161	0.160719	0.3	0.39	-0.229329	0.0957332	0.02	0.05
β-Sitosterol	Anaerostipes hadrus	EC2.4.2.19	Nicotinate-nucleotide diphosphorylase (carboxylating)	0.105851	0.163517	0.52	0.57	-0.148366	0.0975328	0.13	0.14
β-Sitosterol	Anaerostipes hadrus	EC2.4.2.22	Xanthine phosphoribosyltransferase	0.100917	0.170521	0.55	0.6	-0.150843	0.101981	0.14	0.15
β-Sitosterol	Anaerostipes hadrus	EC2.4.2.4	Thymidine phosphorylase	0.0983083	0.155825	0.53	0.58	-0.153339	0.0929441	0.1	0.12
β-Sitosterol	Anaerostipes hadrus	EC2.4.2.8	Hypoxanthine phosphoribosyltransferase	0.216736	0.181157	0.23	0.32	-0.181527	0.107861	0.09	0.11
β-Sitosterol	Anaerostipes hadrus	EC2.4.99.17	S-adenosylmethionine:tRNA ribosyltransferase-isomerase	0.0675976	0.156477	0.67	0.7	-0.175399	0.0935534	0.06	0.08
β-Sitosterol	Anaerostipes hadrus	EC2.5.1.129	NO_NAME	0.119507	0.156008	0.44	0.51	-0.137726	0.0929839	0.14	0.15
β-Sitosterol	Anaerostipes hadrus	EC2.5.1.145	NO_NAME	0.0383682	0.182413	0.83	0.85	-0.24622	0.107587	0.02	0.05
β-Sitosterol	Anaerostipes hadrus	EC2.5.1.15	Dihydropteroate synthase	0.111403	0.152283	0.46	0.52	-0.191094	0.0911971	0.04	0.06
β-Sitosterol	Anaerostipes hadrus	EC2.5.1.17	Cob(I)yrinic acid a,c-diamide adenosyltransferase	0.021979	0.142761	0.88	0.89	-0.196501	0.0852804	0.02	0.05
β-Sitosterol	Anaerostipes hadrus	EC2.5.1.19	3-phosphoshikimate 1-carboxyvinyltransferase	0.138379	0.160866	0.39	0.47	-0.189259	0.0954329	0.05	0.07
β-Sitosterol	Anaerostipes hadrus	EC2.5.1.3	Thiamine-phosphate diphosphorylase	0.185562	0.178767	0.3	0.39	-0.188806	0.106921	0.08	0.1
β-Sitosterol	Anaerostipes hadrus	EC2.5.1.31	diphosphate specific)	-0.0348947	0.159127	0.83	0.84	-0.174548	0.0946002	0.07	0.09
β-Sitosterol	Anaerostipes hadrus	EC2.5.1.47	Cysteine synthase	0.233624	0.204552	0.25	0.35	-0.268412	0.121062	0.03	0.05
β-Sitosterol	Anaerostipes hadrus	EC2.5.1.48	Cystathionine gamma-synthase	0.190554	0.19343	0.32	0.41	-0.239785	0.114767	0.04	0.06
β-Sitosterol	Anaerostipes hadrus	EC2.5.1.49	O-acetylhomoserine aminocarboxypropyltransferase	0.199596	0.231068	0.39	0.47	-0.238742	0.137664	0.08	0.1
β-Sitosterol	Anaerostipes hadrus	EC2.5.1.54	3-deoxy-7-phosphoheptulonate synthase	0.213129	0.193031	0.27	0.36	-0.231886	0.115131	0.04	0.07
β-Sitosterol	Anaerostipes hadrus	EC2.5.1.6	Methionine adenosyltransferase	0.291207	0.222264	0.19	0.28	-0.273206	0.13276	0.04	0.06
β-Sitosterol	Anaerostipes hadrus	EC2.5.1.61	Hydroxymethylbilane synthase	0.0428356	0.138927	0.76	0.78	-0.0977267	0.0832291	0.24	0.25
β-Sitosterol	Anaerostipes hadrus	EC2.5.1.72	Quinolinate synthase	0.088694	0.166328	0.59	0.63	-0.19572	0.098959	0.05	0.07
β-Sitosterol	Anaerostipes hadrus	EC2.5.1.78	6,7-dimethyl-8-ribityllumazine synthase	0.224004	0.200084	0.26	0.36	-0.233898	0.119252	0.05	0.07
β-Sitosterol	Anaerostipes hadrus	EC2.5.1.9	Riboflavin synthase	0.108442	0.181403	0.55	0.59	-0.0484039	0.107215	0.65	0.66
β-Sitosterol	Anaerostipes hadrus	EC2.6.1.1	Aspartate transaminase	0.158074	0.196178	0.42	0.49	-0.192118	0.117222	0.1	0.12
β-Sitosterol	Anaerostipes hadrus	EC2.6.1.11	Acetylornithine transaminase	0.105177	0.172923	0.54	0.59	-0.173679	0.103041	0.09	0.11
β-Sitosterol	Anaerostipes hadrus	EC2.6.1.16	Glutamine--fructose-6-phosphate transaminase (isomerizing)	0.0955873	0.170643	0.58	0.62	-0.195127	0.1005	0.05	0.08
β-Sitosterol	Anaerostipes hadrus	EC2.6.1.17	Succinyldiaminopimelate transaminase	0.101137	0.144399	0.48	0.54	-0.121476	0.0863411	0.16	0.17
β-Sitosterol	Anaerostipes hadrus	EC2.6.1.2	Alanine transaminase	0.0940913	0.185063	0.61	0.65	-0.183847	0.109726	0.09	0.11
β-Sitosterol	Anaerostipes hadrus	EC2.6.1.42	Branched-chain-amino-acid transaminase	0.214162	0.168419	0.2	0.29	-0.194695	0.100273	0.05	0.08
β-Sitosterol	Anaerostipes hadrus	EC2.6.1.52	Phosphoserine transaminase	0.177811	0.16551	0.28	0.37	-0.199807	0.0984054	0.04	0.07
β-Sitosterol	Anaerostipes hadrus	EC2.6.1.83	LL-diaminopimelate aminotransferase	0.15794	0.161796	0.33	0.42	-0.155419	0.0975199	0.11	0.13
β-Sitosterol	Anaerostipes hadrus	EC2.6.1.87	UDP-4-amino-4-deoxy-L-arabinose aminotransferase	-0.116773	0.187903	0.53	0.58	-0.335648	0.11206	0.003	0.04
β-Sitosterol	Anaerostipes hadrus	EC2.6.1.9	Histidinol-phosphate transaminase	0.132936	0.200763	0.51	0.56	-0.240739	0.119364	0.04	0.07
β-Sitosterol	Anaerostipes hadrus	EC2.7.1.107	Diacylglycerol kinase (ATP)	0.148864	0.155052	0.34	0.42	-0.163907	0.0922442	0.08	0.1
β-Sitosterol	Anaerostipes hadrus	EC2.7.1.11	6-phosphofructokinase	0.245887	0.184871	0.18	0.27	-0.216238	0.110205	0.05	0.07
β-Sitosterol	Anaerostipes hadrus	EC2.7.1.15	Ribokinase	0.337741	0.232212	0.15	0.23	-0.220398	0.13863	0.11	0.13
β-Sitosterol	Anaerostipes hadrus	EC2.7.1.17	Xylulokinase	0.16571	0.176553	0.35	0.43	-0.24965	0.104895	0.02	0.05
β-Sitosterol	Anaerostipes hadrus	EC2.7.1.191	NO_NAME	0.266825	0.203854	0.19	0.28	-0.263394	0.120636	0.03	0.06
β-Sitosterol	Anaerostipes hadrus	EC2.7.1.197	NO_NAME	0.392802	0.173958	0.02	0.09	-0.190565	0.104448	0.07	0.09
β-Sitosterol	Anaerostipes hadrus	EC2.7.1.199	NO_NAME	0.0620322	0.170895	0.72	0.74	-0.190299	0.101818	0.06	0.08
β-Sitosterol	Anaerostipes hadrus	EC2.7.1.2	Glucokinase	0.313014	0.215211	0.15	0.23	-0.211866	0.127431	0.1	0.11
β-Sitosterol	Anaerostipes hadrus	EC2.7.1.24	Dephospho-CoA kinase	-0.0280548	0.165623	0.87	0.88	-0.16822	0.0986269	0.09	0.11
β-Sitosterol	Anaerostipes hadrus	EC2.7.1.25	Adenylyl-sulfate kinase	0.191824	0.162464	0.24	0.33	-0.206002	0.0967285	0.03	0.06
β-Sitosterol	Anaerostipes hadrus	EC2.7.1.30	Glycerol kinase	0.279801	0.243518	0.25	0.34	-0.329051	0.144091	0.02	0.05
β-Sitosterol	Anaerostipes hadrus	EC2.7.1.33	Pantothenate kinase	0.228838	0.20787	0.27	0.36	-0.244301	0.122854	0.05	0.07
β-Sitosterol	Anaerostipes hadrus	EC2.7.1.35	Pyridoxal kinase	0.156608	0.188514	0.41	0.48	-0.167321	0.11213	0.14	0.15
β-Sitosterol	Anaerostipes hadrus	EC2.7.1.4	Fructokinase	0.152086	0.165465	0.36	0.44	-0.228236	0.0984378	0.02	0.05
β-Sitosterol	Anaerostipes hadrus	EC2.7.1.40	Pyruvate kinase	0.159236	0.180114	0.38	0.46	-0.237155	0.10668	0.03	0.05
β-Sitosterol	Anaerostipes hadrus	EC2.7.1.48	Uridine kinase	0.232312	0.228027	0.31	0.4	-0.253173	0.135734	0.06	0.08
β-Sitosterol	Anaerostipes hadrus	EC2.7.1.6	Galactokinase	0.0060178	0.157624	0.97	0.97	-0.174771	0.0939355	0.06	0.08
β-Sitosterol	Anaerostipes hadrus	EC2.7.1.69	Protein-N(pi)-phosphohistidine--sugar phosphotransferase	0.265201	0.203931	0.19	0.28	-0.283971	0.120937	0.02	0.05
β-Sitosterol	Anaerostipes hadrus	EC2.7.1.71	Shikimate kinase	0.191669	0.198873	0.34	0.42	-0.269913	0.117766	0.02	0.05
β-Sitosterol	Anaerostipes hadrus	EC2.7.1.90	Diphosphate--fructose-6-phosphate 1-phosphotransferase	0.0411651	0.15473	0.79	0.81	-0.104188	0.0925652	0.26	0.27
β-Sitosterol	Anaerostipes hadrus	EC2.7.1.92	5-dehydro-2-deoxygluconokinase	0.150718	0.179121	0.4	0.47	-0.243215	0.10641	0.02	0.05
β-Sitosterol	Anaerostipes hadrus	EC2.7.10.2	Non-specific protein-tyrosine kinase	0.172892	0.200921	0.39	0.47	-0.260342	0.119704	0.03	0.06
β-Sitosterol	Anaerostipes hadrus	EC2.7.11.1	Non-specific serine/threonine protein kinase	0.206339	0.21204	0.33	0.42	-0.233356	0.126366	0.06	0.09
β-Sitosterol	Anaerostipes hadrus	EC2.7.13.3	Histidine kinase	0.275221	0.183091	0.13	0.21	-0.216931	0.109322	0.05	0.07
β-Sitosterol	Anaerostipes hadrus	EC2.7.2.1	Acetate kinase	0.169742	0.152915	0.27	0.36	-0.203703	0.091718	0.03	0.05
β-Sitosterol	Anaerostipes hadrus	EC2.7.2.3	Phosphoglycerate kinase	0.0783097	0.157381	0.62	0.65	-0.145555	0.0938775	0.12	0.14
β-Sitosterol	Anaerostipes hadrus	EC2.7.2.4	Aspartate kinase	0.165521	0.185564	0.37	0.45	-0.200971	0.111279	0.07	0.09
β-Sitosterol	Anaerostipes hadrus	EC2.7.3.9	Phosphoenolpyruvate--protein phosphotransferase	0.253843	0.187443	0.18	0.26	-0.226112	0.111607	0.04	0.07
β-Sitosterol	Anaerostipes hadrus	EC2.7.4.1	Polyphosphate kinase	0.283788	0.213467	0.18	0.27	-0.257687	0.127159	0.04	0.07
β-Sitosterol	Anaerostipes hadrus	EC2.7.4.14	UMP/CMP kinase	0.034462	0.208756	0.87	0.88	-0.212332	0.1236	0.09	0.1
β-Sitosterol	Anaerostipes hadrus	EC2.7.4.8	Guanylate kinase	0.119241	0.169233	0.48	0.54	-0.166531	0.100189	0.1	0.11
β-Sitosterol	Anaerostipes hadrus	EC2.7.6.1	Ribose-phosphate diphosphokinase	0.189134	0.16846	0.26	0.35	-0.177441	0.100571	0.08	0.1
β-Sitosterol	Anaerostipes hadrus	EC2.7.6.2	Thiamine diphosphokinase	0.142409	0.149844	0.34	0.43	-0.185487	0.0896533	0.04	0.06
β-Sitosterol	Anaerostipes hadrus	EC2.7.6.5	GTP diphosphokinase	0.263285	0.198582	0.18	0.27	-0.216846	0.118215	0.07	0.09
β-Sitosterol	Anaerostipes hadrus	EC2.7.7.12	UDP-glucose--hexose-1-phosphate uridylyltransferase	0.251976	0.251291	0.32	0.41	-0.237601	0.149408	0.11	0.13
β-Sitosterol	Anaerostipes hadrus	EC2.7.7.18	Nicotinate-nucleotide adenylyltransferase	0.0588414	0.142337	0.68	0.71	-0.0773875	0.0851296	0.36	0.37
β-Sitosterol	Anaerostipes hadrus	EC2.7.7.24	Glucose-1-phosphate thymidylyltransferase	0.187897	0.151794	0.22	0.31	-0.153217	0.0907343	0.09	0.11
β-Sitosterol	Anaerostipes hadrus	EC2.7.7.39	Glycerol-3-phosphate cytidylyltransferase	-0.0695638	0.167266	0.68	0.71	-0.185756	0.0993487	0.06	0.08
β-Sitosterol	Anaerostipes hadrus	EC2.7.7.4	Sulfate adenylyltransferase	0.378836	0.24995	0.13	0.2	-0.306302	0.148493	0.04	0.06
β-Sitosterol	Anaerostipes hadrus	EC2.7.7.41	Phosphatidate cytidylyltransferase	0.0347156	0.185956	0.85	0.87	-0.230192	0.1093	0.04	0.06
β-Sitosterol	Anaerostipes hadrus	EC2.7.7.49	RNA-directed DNA polymerase	0.367117	0.223773	0.1	0.17	-0.203983	0.135084	0.13	0.15
β-Sitosterol	Anaerostipes hadrus	EC2.7.7.6	DNA-directed RNA polymerase	0.236301	0.212643	0.27	0.36	-0.268261	0.12651	0.03	0.06
β-Sitosterol	Anaerostipes hadrus	EC2.7.7.60	2-C-methyl-D-erythritol 4-phosphate cytidylyltransferase	0.11336	0.205924	0.58	0.62	-0.23056	0.121606	0.06	0.08
β-Sitosterol	Anaerostipes hadrus	EC2.7.7.7	DNA-directed DNA polymerase	0.331411	0.240417	0.17	0.25	-0.302594	0.141918	0.03	0.06
β-Sitosterol	Anaerostipes hadrus	EC2.7.7.72	CCA tRNA nucleotidyltransferase	0.109744	0.16237	0.5	0.55	-0.202268	0.0961427	0.04	0.06
β-Sitosterol	Anaerostipes hadrus	EC2.7.7.8	Polyribonucleotide nucleotidyltransferase	0.197448	0.174197	0.26	0.35	-0.229133	0.103872	0.03	0.06
β-Sitosterol	Anaerostipes hadrus	EC2.7.7.87	L-threonylcarbamoyladenylate synthase	0.20379	0.162826	0.21	0.3	-0.202662	0.0977998	0.04	0.06
β-Sitosterol	Anaerostipes hadrus	EC2.7.7.9	UTP--glucose-1-phosphate uridylyltransferase	0.187897	0.151794	0.22	0.31	-0.153217	0.0907343	0.09	0.11
β-Sitosterol	Anaerostipes hadrus	EC2.7.8.12	CDP-glycerol glycerophosphotransferase	0.172261	0.195349	0.38	0.46	-0.217877	0.115951	0.06	0.08
β-Sitosterol	Anaerostipes hadrus	EC2.7.8.5	CDP-diacylglycerol--glycerol-3-phosphate 3-phosphatidyltransferase	0.284721	0.156712	0.07	0.12	-0.150837	0.0942126	0.11	0.13
β-Sitosterol	Anaerostipes hadrus	EC2.7.8.8	CDP-diacylglycerol--serine O-phosphatidyltransferase	0.174719	0.151042	0.25	0.34	-0.225676	0.0900252	0.01	0.05
β-Sitosterol	Anaerostipes hadrus	EC2.7.9.3	Selenide, water dikinase	0.084264	0.14068	0.55	0.59	-0.100644	0.084205	0.23	0.24
β-Sitosterol	Anaerostipes hadrus	EC2.8.1.10	Thiazole synthase	0.105647	0.163789	0.52	0.57	-0.204445	0.0976465	0.04	0.06
β-Sitosterol	Anaerostipes hadrus	EC2.8.1.13	tRNA-uridine 2-sulfurtransferase	0.139529	0.156819	0.37	0.46	-0.186257	0.0935923	0.05	0.07
β-Sitosterol	Anaerostipes hadrus	EC2.8.1.6	Biotin synthase	0.144787	0.189346	0.44	0.51	-0.222068	0.112642	0.05	0.07
β-Sitosterol	Anaerostipes hadrus	EC2.8.3.16	Formyl-CoA transferase	0.0898475	0.159419	0.57	0.61	-0.209146	0.095079	0.03	0.06
β-Sitosterol	Anaerostipes hadrus	EC2.8.3.8	Acetate CoA-transferase	0.168421	0.196316	0.39	0.47	-0.194647	0.117072	0.1	0.11
β-Sitosterol	Anaerostipes hadrus	EC3.1.1.3	Triacylglycerol lipase	0.354393	0.235031	0.13	0.21	-0.210156	0.140946	0.14	0.15
β-Sitosterol	Anaerostipes hadrus	EC3.1.11.6	Exodeoxyribonuclease VII	0.0869531	0.166996	0.6	0.64	-0.135298	0.100366	0.18	0.19
β-Sitosterol	Anaerostipes hadrus	EC3.1.13.1	Exoribonuclease II	0.14947	0.156797	0.34	0.43	-0.190622	0.0930096	0.04	0.07
β-Sitosterol	Anaerostipes hadrus	EC3.1.22.4	Crossover junction endodeoxyribonuclease	0.0605176	0.165594	0.71	0.74	-0.12368	0.0988148	0.21	0.22
β-Sitosterol	Anaerostipes hadrus	EC3.1.26.11	Ribonuclease Z	0.243181	0.187541	0.19	0.28	-0.272142	0.111078	0.01	0.05
β-Sitosterol	Anaerostipes hadrus	EC3.1.26.3	Ribonuclease III	0.0964601	0.182215	0.6	0.63	-0.227997	0.107351	0.03	0.06
β-Sitosterol	Anaerostipes hadrus	EC3.1.26.5	Ribonuclease P	0.0853779	0.195143	0.66	0.69	-0.182572	0.116752	0.12	0.13
β-Sitosterol	Anaerostipes hadrus	EC3.1.3.11	Fructose-bisphosphatase	0.125343	0.167354	0.45	0.51	-0.153304	0.0999345	0.13	0.14
β-Sitosterol	Anaerostipes hadrus	EC3.1.3.15	Histidinol-phosphatase	0.0836653	0.192348	0.66	0.7	-0.202681	0.114191	0.08	0.1
β-Sitosterol	Anaerostipes hadrus	EC3.1.3.16	Protein-serine/threonine phosphatase	0.221974	0.196692	0.26	0.35	-0.251136	0.116932	0.03	0.06
β-Sitosterol	Anaerostipes hadrus	EC3.1.3.18	Phosphoglycolate phosphatase	0.0902521	0.188364	0.63	0.67	-0.170953	0.112336	0.13	0.14
β-Sitosterol	Anaerostipes hadrus	EC3.1.4.46	Glycerophosphodiester phosphodiesterase	0.156379	0.240145	0.51	0.57	-0.21178	0.143251	0.14	0.15
β-Sitosterol	Anaerostipes hadrus	EC3.1.4.52	Cyclic-guanylate-specific phosphodiesterase	0.413349	0.225138	0.07	0.12	-0.274147	0.134288	0.04	0.07
β-Sitosterol	Anaerostipes hadrus	EC3.2.1.10	Oligo-1,6-glucosidase	0.162094	0.164575	0.32	0.41	-0.171029	0.0979739	0.08	0.1
β-Sitosterol	Anaerostipes hadrus	EC3.2.1.122	Maltose-6'-phosphate glucosidase	0.162968	0.241795	0.5	0.55	-0.36909	0.141924	0.009	0.05
β-Sitosterol	Anaerostipes hadrus	EC3.2.1.135	Neopullulanase	0.172283	0.185843	0.35	0.44	-0.170493	0.110101	0.12	0.14
β-Sitosterol	Anaerostipes hadrus	EC3.2.1.17	Lysozyme	0.118548	0.194348	0.54	0.59	-0.265638	0.115465	0.02	0.05
β-Sitosterol	Anaerostipes hadrus	EC3.2.1.21	Beta-glucosidase	0.220614	0.172517	0.2	0.29	-0.119582	0.103362	0.25	0.26
β-Sitosterol	Anaerostipes hadrus	EC3.2.1.23	Beta-galactosidase	0.371462	0.277267	0.18	0.27	-0.287723	0.165525	0.08	0.1
β-Sitosterol	Anaerostipes hadrus	EC3.2.1.26	Beta-fructofuranosidase	0.288423	0.205685	0.16	0.25	-0.207827	0.122644	0.09	0.11
β-Sitosterol	Anaerostipes hadrus	EC3.2.1.41	Pullulanase	0.0774556	0.155537	0.62	0.65	-0.234412	0.0925389	0.01	0.05
β-Sitosterol	Anaerostipes hadrus	EC3.2.1.52	Beta-N-acetylhexosaminidase	0.164711	0.163686	0.31	0.4	-0.15451	0.0979579	0.11	0.13
β-Sitosterol	Anaerostipes hadrus	EC3.2.1.80	Fructan beta-fructosidase	0.097897	0.153966	0.52	0.57	-0.15245	0.0922282	0.1	0.12
β-Sitosterol	Anaerostipes hadrus	EC3.2.1.86	6-phospho-beta-glucosidase	0.406519	0.275734	0.14	0.22	-0.314714	0.165559	0.06	0.08
β-Sitosterol	Anaerostipes hadrus	EC3.2.1.96	Mannosyl-glycoprotein endo-beta-N-acetylglucosaminidase	0.212217	0.168449	0.21	0.3	-0.215664	0.100487	0.03	0.06
β-Sitosterol	Anaerostipes hadrus	EC3.2.2.27	Uracil-DNA glycosylase	0.0457348	0.158918	0.77	0.79	-0.178616	0.0949564	0.06	0.08
β-Sitosterol	Anaerostipes hadrus	EC3.2.2.31	NO_NAME	0.214028	0.180269	0.24	0.33	-0.159889	0.107209	0.14	0.15
β-Sitosterol	Anaerostipes hadrus	EC3.2.2.9	Adenosylhomocysteine nucleosidase	0.26527	0.194476	0.17	0.26	-0.219964	0.116418	0.06	0.08
β-Sitosterol	Anaerostipes hadrus	EC3.4.11.18	Methionyl aminopeptidase	0.239995	0.218102	0.27	0.36	-0.232755	0.130705	0.07	0.09
β-Sitosterol	Anaerostipes hadrus	EC3.4.11.4	Tripeptide aminopeptidase	0.0280834	0.208791	0.89	0.9	-0.182267	0.125962	0.15	0.16
β-Sitosterol	Anaerostipes hadrus	EC3.4.11.9	Xaa-Pro aminopeptidase	0.110914	0.169416	0.51	0.56	-0.0997651	0.102675	0.33	0.34
β-Sitosterol	Anaerostipes hadrus	EC3.4.13.18	Cytosol nonspecific dipeptidase	-0.0249966	0.230117	0.91	0.92	-0.0961985	0.137997	0.49	0.5
β-Sitosterol	Anaerostipes hadrus	EC3.4.16.4	Serine-type D-Ala-D-Ala carboxypeptidase	0.203565	0.211482	0.34	0.42	-0.232254	0.125851	0.06	0.09
β-Sitosterol	Anaerostipes hadrus	EC3.4.21.105	Rhomboid protease	0.314915	0.223103	0.16	0.24	-0.353061	0.131067	0.007	0.04
β-Sitosterol	Anaerostipes hadrus	EC3.4.21.88	Repressor LexA	0.101697	0.184428	0.58	0.62	-0.145778	0.110005	0.19	0.2
β-Sitosterol	Anaerostipes hadrus	EC3.4.21.89	Signal peptidase I	0.15738	0.206726	0.45	0.51	-0.273904	0.122844	0.03	0.05
β-Sitosterol	Anaerostipes hadrus	EC3.4.22.71	Sortase B	0.108647	0.194465	0.58	0.62	-0.238277	0.115325	0.04	0.06
β-Sitosterol	Anaerostipes hadrus	EC3.4.23.36	Signal peptidase II	0.158502	0.192683	0.41	0.48	-0.182632	0.114233	0.11	0.13
β-Sitosterol	Anaerostipes hadrus	EC3.5.1.14	N-acyl-aliphatic-L-amino acid amidohydrolase	0.136893	0.176093	0.44	0.5	-0.218412	0.104612	0.04	0.06
β-Sitosterol	Anaerostipes hadrus	EC3.5.1.2	Glutaminase	0.145044	0.191256	0.45	0.51	-0.209064	0.113832	0.07	0.09
β-Sitosterol	Anaerostipes hadrus	EC3.5.1.24	Choloylglycine hydrolase	0.32384	0.235383	0.17	0.25	-0.209016	0.140172	0.14	0.15
β-Sitosterol	Anaerostipes hadrus	EC3.5.1.25	N-acetylglucosamine-6-phosphate deacetylase	0.126501	0.174543	0.47	0.53	-0.180966	0.103675	0.08	0.1
β-Sitosterol	Anaerostipes hadrus	EC3.5.1.28	N-acetylmuramoyl-L-alanine amidase	0.346707	0.231997	0.14	0.21	-0.28151	0.137339	0.04	0.07
β-Sitosterol	Anaerostipes hadrus	EC3.5.1.32	Hippurate hydrolase	0.136893	0.176093	0.44	0.5	-0.218412	0.104612	0.04	0.06
β-Sitosterol	Anaerostipes hadrus	EC3.5.1.87	N-carbamoyl-L-amino-acid hydrolase	0.0380158	0.16119	0.81	0.83	-0.155312	0.0961605	0.11	0.12
β-Sitosterol	Anaerostipes hadrus	EC3.5.1.88	Peptide deformylase	0.287029	0.225645	0.2	0.29	-0.20164	0.134827	0.13	0.15
β-Sitosterol	Anaerostipes hadrus	EC3.5.2.2	Dihydropyrimidinase	0.0757565	0.15141	0.62	0.65	-0.143298	0.0905444	0.11	0.13
β-Sitosterol	Anaerostipes hadrus	EC3.5.2.3	Dihydroorotase	0.212011	0.180843	0.24	0.33	-0.191868	0.10832	0.08	0.1
β-Sitosterol	Anaerostipes hadrus	EC3.5.2.9	5-oxoprolinase (ATP-hydrolyzing)	0.0031666	0.163616	0.98	0.99	-0.187932	0.0974494	0.05	0.08
β-Sitosterol	Anaerostipes hadrus	EC3.5.4.10	IMP cyclohydrolase	0.131341	0.160229	0.41	0.48	-0.15137	0.0966217	0.12	0.13
β-Sitosterol	Anaerostipes hadrus	EC3.5.4.12	dCMP deaminase	0.0586322	0.177862	0.74	0.77	-0.102544	0.106964	0.34	0.35
β-Sitosterol	Anaerostipes hadrus	EC3.5.4.16	GTP cyclohydrolase I	0.10457	0.159075	0.51	0.56	-0.193466	0.0948154	0.04	0.07
β-Sitosterol	Anaerostipes hadrus	EC3.5.4.2	Adenine deaminase	0.158037	0.159744	0.32	0.41	-0.222511	0.0948974	0.02	0.05
β-Sitosterol	Anaerostipes hadrus	EC3.5.4.28	S-adenosylhomocysteine deaminase	0.160868	0.179038	0.37	0.45	-0.17704	0.106829	0.1	0.12
β-Sitosterol	Anaerostipes hadrus	EC3.5.4.33	tRNA(adenine(34)) deaminase	0.228404	0.196605	0.25	0.34	-0.196413	0.118039	0.1	0.11
β-Sitosterol	Anaerostipes hadrus	EC3.5.4.5	Cytidine deaminase	0.18022	0.166766	0.28	0.37	-0.140148	0.0990691	0.16	0.17
β-Sitosterol	Anaerostipes hadrus	EC3.5.4.9	Methenyltetrahydrofolate cyclohydrolase	0.0557897	0.149714	0.71	0.74	-0.167137	0.0894197	0.06	0.08
[truncated: 947 more rows]

## Sheet: Table S6
Table S6. Association between F. prausnitzii-encoded EC1.3.99.4 and metabolites
[truncated: 225 more rows]
